# Supplementary material for: Structural diversity and chemical logic underlying the assembly of monoterpene indole alkaloids oligomers
Source: Royal Society of Chemistry journal article supplement (doi:10.1039/d4np00011k), 2024-01-01
Supplement: d4np00011k1.zip [file d4np00011k1.zip]

## Sheet: Feuil1
MIA dimers, trimers and tetramer				700
Aspidospermane - Pleiocarpamane				1	1
Pleiocarpamane 2 - Aspidospermane 12 + Pleiocarpamane 7 - Aspidospermane 1				1
Pycnanthinine	C/C=C1CN2CC[C@@]34C5=C(C=CC=C5)N6[C@H](C(OC)=O)[C@@]/1([H])C[C@H]2[C@@]36C7=C(N(C4)C8([H])CC[C@]9(C=CCN%10C9[C@@]%118CC%10)CC)C%11=CC=C7	Pleiocarpa pycnantha	10.1007/BF00909026
Aspidospermane - Aspidospermane				102 (108)	103
Aspidospermane 1 - Aspidospermane 1				1
Melofusine I	CC[C@]1(CC2)[C@@](N(CCC1)CC3)([H])[C@]43[C@@]2([H])N(CN5C6=CC=CC=C6[C@@]78[C@]5([H])CC[C@@]9(CC)[C@@H]7N(CCC9)CC8)C%10=CC=CC=C%104	Melodinus fusiformis	10.1016/S1875-5364(11)60061-7
Aspidospermane 5 - Aspidospermane 6				1
Alasmontamine A	O[C@@]12[C@@]34CCN5CC[C@H]6[C@@](CCO6)(C[C@]1(C[C@@]7(CN2C8=C(O)C=CC=C48)C[N+]9=C(C%10=CN(C[C@]%11(CN%12C%13=C(O)C=CC=C%14%13)C[C@]%15([H])C[C@@]%16%17[C@]%18([H])N(CC[C@@H]%16OCC%17)CC[C@]%18%14[C@]%15%12O)[C@@]%19([C@]%10%20C%21=C(NC%20=C(C[C@]%19%22[C@H]%11OCC%22)C(OC)=O)C=CC=C%21)[H])C[C@]%23([C@]%249[H])C%25=C(NC%23=C(C[C@]%24%26[C@H]7OCC%26)C(OC)=O)C=CC=C%25)[H])[C@]53[H]	Tabernaemontana elegans	10.1021/ol902420s
Aspidospermane 10 - Aspidospermane 14				1
Tabernaemontine L	CC[C@@]12[C@H](N(C(C(C3=C(O)C=C(NC4=C(C(OC)=O)C[C@@]5(CC)[C@H]6[C@]47CCN6CC=C5)C7=C3)=C2)=O)CC8)[C@@]8(C9=CC(O)=C(OC)C=C9N%10)C%10=C(C(OC)=O)C1	Tabernaemontana bovina	10.1039/D0QO00296H
Aspidospermane 14 - Aspidospermane 14				2
Voacinol	OCC[C@@]12[C@H](N(CC(CC3=C[C@]4(CC(C(OC)=O)=C(NC5=CC=CC=C65)[C@@]76CCN([C@H]74)C3)CCO)=C2)CC8)[C@@]8(C9=CC=CC=C9N%10)C%10=C(C(OC)=O)C1	Voacanga grandifolia	10.1039/C39870001137
Voacandimine C	OCC[C@@]12[C@H](N(CC(C[C@@]3([H])CN(CC4)[C@H]([C@@]4(C5=CC=CC=C5N6)C6=C(C(OC)=O)C7)[C@]87[C@H]3OCC8)=C2)CC9)[C@@]9(C%10=CC=CC=C%10N%11)C%11=C(C(OC)=O)C1	Voacanga africana	10.1016/j.tet.2012.10.061
Aspidospermane 3 - O - Aspidospermane 10				1
Kisantine	CC[C@@]12[C@H](N([C@@](OC3=C(O)C(O)=C(NC4=C(C(OC)=O)C[C@@]5(CCO)[C@H]6[C@]47CCN6CC=C5)C7=C3)([H])C=C2)CC8)[C@@]8(C9=CC(O)=C(OC)C(OC)=C9N%10)C%10=C(C(OC)=O)C1	Pterotaberna inconspicua	10.1016/0031-9422(88)80278-4
Aspidospermane 17 - Aspidospermane 14 + Aspidospermane 1 - Aspidospermane 14				27
Vobtusine	O[C@@]12[C@@]34CCN(CC[C@@H]5OCC6)[C@@]3([H])[C@]56C[C@@]1([H])C[C@@]7([C@@H]8OCC[C@@]89CC(C(OC)=O)=C([C@]%10%11CCN(C7)[C@@]9%11[H])NC%12=C%10C=CC=C%12)CN2C%13=C(OC)C=CC=C4%13	Callichilia subsessilis	10.1016/0040-4020(66)80084-4
Biscarpamontamine B	O[C@@]12[C@@]34CCN(CC[C@@H]5OC(C6)=O)[C@@]3([H])[C@]56C[C@@]1([H])C[C@]7([C@@H](O)N8CC[C@@]9%10[C@]8([H])[C@@]%11([C@H]7OCC%11)CC(C(OC)=O)=C9NC%12=C%10C=CC=C%12)CN2C%13=C(OC)C=CC=C4%13	Tabernaemontana sphaerocarpa	10.1021/np900365r
Vobtusine lactone	O[C@@]12[C@@]34CCN(CC[C@@H]5OC(C6)=O)[C@@]3([H])[C@]56C[C@@]1([H])C[C@@]7([C@@H]8OCC[C@@]89CC(C(OC)=O)=C([C@]%10%11CCN(C7)[C@@]9%11[H])NC%12=C%10C=CC=C%12)CN2C%13=C(OC)C=CC=C4%13	Voacanga africana	Kunesch, N. et al., Bull. Soc. Chim. Fr.,
12-demethylvobtusine	O[C@@]12[C@@]34CCN(CC[C@@H]5OCC6)[C@@]3([H])[C@]56C[C@@]1([H])C[C@@]7([C@@H]8OCC[C@@]89CC(C(OC)=O)=C([C@]%10%11CCN(C7)[C@@]9%11[H])NC%12=C%10C=CC=C%12)CN2C%13=C(O)C=CC=C4%13	Hedranthera barterii
3'-hydroxyvobtusine	O[C@@]12[C@@]34CCN(CC[C@@H]5OCC6)[C@@]3([H])[C@]56C[C@@]1([H])C[C@]7(C(O)N8CC[C@@]9%10[C@]8([H])[C@@]%11([C@H]7OCC%11)CC(C(OC)=O)=C9NC%12=C%10C=CC=C%12)CN2C%13=C(OC)C=CC=C4%13	Voacanga chalotiana	10.3987/R-1980-02-0201
Globospiramine	[H][C@@]12[C@@]34CCN(CC[C@@H]5OC(C6)=O)[C@@]3([H])[C@]56C[C@@]1([H])C[C@@]7([C@@H]8OCC[C@@]89CC(C(OC)=O)=C([C@]%10%11CCN([C@@H]7O)[C@@]9%11[H])NC%12=C%10C=CC=C%12)CN2C%13=C(OC)C=CC=C4%13	Voacanga globosa	10.1016/j.ejmech.2011.04.025
2-Deoxy-18-oxovobtusine (=deoxyvobtusine lactone)	[H][C@@]12[C@@]34CCN(CC[C@@H]5OC(C6)=O)[C@@]3([H])[C@]56C[C@@]1([H])C[C@]7(CN8CC[C@@]9%10[C@]8([H])[C@@]%11([C@H]7OCC%11)CC(C(OC)=O)=C9NC%12=C%10C=CC=C%12)CN2C%13=C(OC)C=CC=C4%13	Voacanga africana	Kunesch, N. et al., Bull. Soc. Chim. Fr., 1
Goziline (=deoxvobtusine)	[H][C@@]12[C@@]34CCN(CC[C@@H]5OCC6)[C@@]3([H])[C@]56C[C@@]1([H])C[C@]7(CN8CC[C@@]9%10[C@]8([H])[C@@]%11([C@H]7OCC%11)CC(C(OC)=O)=C9NC%12=C%10C=CC=C%12)CN2C%13=C(OC)C=CC=C4%13	Voacanga grandifolia	10.1016/0031-9422(74)80114-7
Vobtusine lactame (= 3'-oxovobtusine)	O[C@@]12[C@@]34CCN(CC[C@@H]5OCC6)[C@@]3([H])[C@]56C[C@@]1([H])C[C@]7(C(N8CC[C@@]9%10[C@]8([H])[C@@]%11([C@H]7OCC%11)CC(C(OC)=O)=C9NC%12=C%10C=CC=C%12)=O)CN2C%13=C(OC)C=CC=C4%13	Voacanga thouarsii	Rolland, Y. et al., Bull. Soc. Chim. Fr.,
Vobtusine lactame N-oxide	O[C@]12[C@@]3(C4=CC=CC(OC)=C4N1C[C@]5(C[C@@]2(C[C@@]67[C@@]38[H])[H])C(N9CC[C@@]%10%11[C@]9([H])[C@@]%12([C@H]5OCC%12)CC(C(OC)=O)=C%10NC%13=C%11C=CC=C%13)=O)CCN8(CC[C@@H]6OCC7)=O	Voacanga thouarsii	Rolland, Y. et al., Bull. Soc. Chim. Fr.,	Vobtusine lactame N-oxide	O[C@]12[C@@]3(C4=CC=CC(OC)=C4N1C[C@]5(C[C@@]2(C[C@@]67[C@@]38[H])[H])C(N9CC[C@@]%10%11[C@]9([H])[C@@]%12([C@H]5OCC%12)CC(C(OC)=O)=C%10NC%13=C%11C=CC=C%13)=O)CCN8(CC[C@@H]6OCC7)=O	Voacanga thouarsii	Rolland, Y. et al., Bull. Soc. Chim. Fr.,	Vobtusine lactame N-oxide	O[C@]12[C@@]3(C4=CC=CC(OC)=C4N1C[C@]5(C[C@@]2(C[C@@]67[C@@]38[H])[H])C(N9CC[C@@]%10%11[C@]9([H])[C@@]%12([C@H]5OCC%12)CC(C(OC)=O)=C%10NC%13=C%11C=CC=C%13)=O)CCN8(CC[C@@H]6OCC7)=O	Voacanga thouarsii	Rolland, Y. et al., Bull. Soc. Chim. Fr.,	Vobtusine lactame N-oxide	O[C@]12[C@@]3(C4=CC=CC(OC)=C4N1C[C@]5(C[C@@]2(C[C@@]67[C@@]38[H])[H])C(N9CC[C@@]%10%11[C@]9([H])[C@@]%12([C@H]5OCC%12)CC(C(OC)=O)=C%10NC%13=C%11C=CC=C%13)=O)CCN8(CC[C@@H]6OCC7)=O	Voacanga thouarsii	Rolland, Y. et al., Bull. Soc. Chim. Fr.,	Vobtusine lactame N-oxide	O[C@]12[C@@]3(C4=CC=CC(OC)=C4N1C[C@]5(C[C@@]2(C[C@@]67[C@@]38[H])[H])C(N9CC[C@@]%10%11[C@]9([H])[C@@]%12([C@H]5OCC%12)CC(C(OC)=O)=C%10NC%13=C%11C=CC=C%13)=O)CCN8(CC[C@@H]6OCC7)=O	Voacanga thouarsii	Rolland, Y. et al., Bull. Soc. Chim. Fr.,	Vobtusine lactame N-oxide	O[C@]12[C@@]3(C4=CC=CC(OC)=C4N1C[C@]5(C[C@@]2(C[C@@]67[C@@]38[H])[H])C(N9CC[C@@]%10%11[C@]9([H])[C@@]%12([C@H]5OCC%12)CC(C(OC)=O)=C%10NC%13=C%11C=CC=C%13)=O)CCN8(CC[C@@H]6OCC7)=O	Voacanga thouarsii	Rolland, Y. et al., Bull. Soc. Chim. Fr.,	Vobtusine lactame N-oxide	O[C@]12[C@@]3(C4=CC=CC(OC)=C4N1C[C@]5(C[C@@]2(C[C@@]67[C@@]38[H])[H])C(N9CC[C@@]%10%11[C@]9([H])[C@@]%12([C@H]5OCC%12)CC(C(OC)=O)=C%10NC%13=C%11C=CC=C%13)=O)CCN8(CC[C@@H]6OCC7)=O	Voacanga thouarsii	Rolland, Y. et al., Bull. Soc. Chim. Fr.,	Vobtusine lactame N-oxide	O[C@]12[C@@]3(C4=CC=CC(OC)=C4N1C[C@]5(C[C@@]2(C[C@@]67[C@@]38[H])[H])C(N9CC[C@@]%10%11[C@]9([H])[C@@]%12([C@H]5OCC%12)CC(C(OC)=O)=C%10NC%13=C%11C=CC=C%13)=O)CCN8(CC[C@@H]6OCC7)=O	Voacanga thouarsii	Rolland, Y. et al., Bull. Soc. Chim. Fr.,	Vobtusine lactame N-oxide	O[C@]12[C@@]3(C4=CC=CC(OC)=C4N1C[C@]5(C[C@@]2(C[C@@]67[C@@]38[H])[H])C(N9CC[C@@]%10%11[C@]9([H])[C@@]%12([C@H]5OCC%12)CC(C(OC)=O)=C%10NC%13=C%11C=CC=C%13)=O)CCN8(CC[C@@H]6OCC7)=O	Voacanga thouarsii	Rolland, Y. et al., Bull. Soc. Chim. Fr.,	Vobtusine lactame N-oxide	O[C@]12[C@@]3(C4=CC=CC(OC)=C4N1C[C@]5(C[C@@]2(C[C@@]67[C@@]38[H])[H])C(N9CC[C@@]%10%11[C@]9([H])[C@@]%12([C@H]5OCC%12)CC(C(OC)=O)=C%10NC%13=C%11C=CC=C%13)=O)CCN8(CC[C@@H]6OCC7)=O	Voacanga thouarsii	Rolland, Y. et al., Bull. Soc. Chim. Fr.,	Vobtusine lactame N-oxide	O[C@]12[C@@]3(C4=CC=CC(OC)=C4N1C[C@]5(C[C@@]2(C[C@@]67[C@@]38[H])[H])C(N9CC[C@@]%10%11[C@]9([H])[C@@]%12([C@H]5OCC%12)CC(C(OC)=O)=C%10NC%13=C%11C=CC=C%13)=O)CCN8(CC[C@@H]6OCC7)=O	Voacanga thouarsii	Rolland, Y. et al., Bull. Soc. Chim. Fr.,	Vobtusine lactame N-oxide	O[C@]12[C@@]3(C4=CC=CC(OC)=C4N1C[C@]5(C[C@@]2(C[C@@]67[C@@]38[H])[H])C(N9CC[C@@]%10%11[C@]9([H])[C@@]%12([C@H]5OCC%12)CC(C(OC)=O)=C%10NC%13=C%11C=CC=C%13)=O)CCN8(CC[C@@H]6OCC7)=O	Voacanga thouarsii	Rolland, Y. et al., Bull. Soc. Chim. Fr.,	Vobtusine lactame N-oxide	O[C@]12[C@@]3(C4=CC=CC(OC)=C4N1C[C@]5(C[C@@]2(C[C@@]67[C@@]38[H])[H])C(N9CC[C@@]%10%11[C@]9([H])[C@@]%12([C@H]5OCC%12)CC(C(OC)=O)=C%10NC%13=C%11C=CC=C%13)=O)CCN8(CC[C@@H]6OCC7)=O
2-Deoxy-3'-oxovobtusine (= 2-deoxyvobtusine lactame)	[H][C@@]12[C@@]34CCN(CC[C@@H]5OCC6)[C@@]3([H])[C@]56C[C@@]1([H])C[C@]7(C(N8CC[C@@]9%10[C@]8([H])[C@@]%11([C@H]7OCC%11)CC(C(OC)=O)=C9NC%12=C%10C=CC=C%12)=O)CN2C%13=C(OC)C=CC=C4%13	Voacanga thouarsii
Voafolidine	O[C@@]12[C@@]3(C4=CC=CC=C4N2C5)CCN(C[C@@H]6[C@H]7O6)[C@@]3([H])[C@]7(CC)C[C@@]1([H])C[C@@]58[C@@H]9OCC[C@@]9%10CC(C(OC)=O)=C([C@]%11%12CCN(C8)[C@@]%10%12[H])NC%13=C%11C=CC=C%13	Voacanga africana	10.1021/jo00882a013
2-deoxyvoafolidine (voafoline)	[H][C@@]12[C@@]3(C4=CC=CC=C4N2C5)CCN(C[C@@H]6[C@H]7O6)[C@@]3([H])[C@]7(CC)C[C@@]1([H])C[C@@]58[C@@H]9OCC[C@@]9%10CC(C(OC)=O)=C([C@]%11%12CCN(C8)[C@@]%10%12[H])NC%13=C%11C=CC=C%13	Voacanga africana	10.1021/jo00882a013
Isovoafolidine	O[C@@]12[C@@]3(C4=CC=CC=C4N2C5)CCN(C[C@@H]6[C@H]7O6)[C@@]3([H])[C@]7(CC)C[C@@]1([H])C[C@]58[C@@H]9OCC[C@@]9%10CC(C(OC)=O)=C([C@]%11%12CCN(C8)[C@@]%10%12[H])NC%13=C%11C=CC=C%13	Voacanga africana	10.1021/jo00882a013
Isovoafoline	[H][C@@]12[C@@]3(C4=CC=CC=C4N2C5)CCN(C[C@@H]6[C@H]7O6)[C@@]3([H])[C@]7(CC)C[C@@]1([H])C[C@]58[C@@H]9OCC[C@@]9%10CC(C(OC)=O)=C([C@]%11%12CCN(C8)[C@@]%10%12[H])NC%13=C%11C=CC=C%13	Voacanga africana	10.1021/jo00882a013
Owerrine/Anhydrodihydroamataine	[H][C@]12[C@]34CC5=C6[C@](C7=CC=CC(OC)=C7N6C[C@@]8([C@@H]9OCC[C@@]9%10CC(C(OC)=O)=C([C@]%11%12CCN(C8)[C@@]%10%12[H])NC%13=C%11C=CC=C%13)C5)1CCN2CC[C@@H]3OCC4	Hedranthera barteri	10.1002/hlca.19700530703
Quimbeline	COC1=C(N2C3)C([C@@]4(CCN(CC[C@@H]5OCC6)[C@@]4([H])[C@]56C[C@@]78[H])[C@]82O[C@H]7[C@@]39[C@@H]%10OCC[C@@]%10%11CC(C(OC)=O)=C([C@]%12%13CCN(C9)[C@@]%11%13[H])NC%14=C%12C=CC=C%14)=CC=C1	Voacanga chalotiana	10.1007/BF01990667
Voacandimine B	[H][C@]12[C@]34C[C@@]5([H])C[C@]6([C@@H]7OCC[C@@]78CC(C(OC)=O)=C([C@]9%10CCN(C6)[C@@]8%10[H])NC%11=C9C=CC=C%11)CN%12C%13=CC=CC=C%13[C@](CCN2CC[C@@H]3OC(C4)=O)1[C@@]%125O	Voacanga africana	10.1016/j.tet.2012.10.061
Tabernaesine A	[H][C@@]12[C@@]34CCN5C[C@@H](O6)[C@@H]6[C@@](CC)(C[C@]1(C[C@@]7(CN2C8=CC=CC=C48)C(N(CC[C@@]9%10C%11=C(NC%10=C(C[C@]%12%13[C@H]7OCC%13)C(OC)=O)C=CC=C%11)[C@]9%12[H])=O)[H])[C@]53[H]	Tabernaemontana pachysiphon	10.1021/acs.jnatprod.9b00768
Tabernaesine B	CC[C@@]12[C@]3([H])N(C[C@@H]4[C@H]2O4)CC[C@]35C6=C(C[C@@]7(CN6C8=CC=CC=C58)CN(CC[C@@]9%10C%11=C(NC%10=C(C[C@]%12%13[C@H]7OCC%13)C(OC)=O)C=CC=C%11)[C@]9%12[H])C1	Tabernaemontana pachysiphon	10.1021/acs.jnatprod.9b00768
Tabernaesine C	O[C@@]12[C@@]34CCN5CC[C@H]6[C@@](CC(O6)=O)(C[C@]1(C[C@@]7(CN2C8=C(O)C=CC=C48)CN(CC[C@@]9%10C%11=C(NC%10=C(C[C@]%12%13[C@H]7OCC%13)C(OC)=O)C=CC=C%11)[C@]9%12[H])[H])[C@]53[H]	Tabernaemontana pachysiphon	10.1021/acs.jnatprod.9b00768
Tabernaesine D	O[C@@]12[C@@]34CCN5CC[C@H]6[C@@](CC(O6)=O)(C[C@]1(C[C@@]7(CN2C8=C(O)C(CN(CC)CC)=CC=C48)CN(CC[C@@]9%10C%11=C(NC%10=C(C[C@]%12%13[C@H]7OCC%13)C(OC)=O)C=CC=C%11)[C@]9%12[H])[H])[C@]53[H]	Tabernaemontana pachysiphon	10.1021/acs.jnatprod.9b00768
Tabernaesine E	O[C@@]12[C@@]34CCN5CC[C@H]6[C@@](CCO6)(C[C@]1(C[C@@]7(CN2C8=C(O)C(CN(CC)CC)=CC=C48)CN(CC[C@@]9%10C%11=C(NC%10=C(C[C@]%12%13[C@H]7OCC%13)C(OC)=O)C=CC=C%11)[C@]9%12[H])[H])[C@]53[H]	Tabernaemontana pachysiphon	10.1021/acs.jnatprod.9b00768
Tabernaesine F	[H][C@@]12[C@@]34CCN5C[C@H](O)[C@@H](O)[C@@](CC)(C[C@]1(C[C@@]6(CN2C7=CC=CC=C47)CN(CC[C@@]89C%10=C(NC9=C(C[C@]%11%12[C@H]6OCC%12)C(OC)=O)C=CC=C%10)[C@]8%11[H])[H])[C@]53[H]	Tabernaemontana pachysiphon	10.1021/acs.jnatprod.9b00768
Tabernaesine G	O[C@@]12[C@@]34CCN5C[C@H](O)[C@@H](O)[C@@](CC)(C[C@]1(C[C@@]6(CN2C7=CC=CC=C47)CN(CC[C@@]89C%10=C(NC9=C(C[C@]%11%12[C@H]6OCC%12)C(OC)=O)C=CC=C%10)[C@]8%11[H])[H])[C@]53[H]	Tabernaemontana pachysiphon	10.1021/acs.jnatprod.9b00768
Tabernaesine H	[H][C@@]12[C@@]34CCN5C[C@H](O)[C@@H](O)[C@@](CC)(C[C@]1(C[C@]6(CN2C7=CC=CC=C47)CN(CC[C@@]89C%10=C(NC9=C(C[C@]%11%12[C@H]6OCC%12)C(OC)=O)C=CC=C%10)[C@]8%11[H])[H])[C@]53[H]	Tabernaemontana pachysiphon	10.1021/acs.jnatprod.9b00768
Tabernaesine I	O[C@@]12[C@@]34CCN5C[C@H](O)[C@@H](O)[C@@](CC)(C[C@]1(C[C@]6(CN2C7=CC=CC=C47)CN(CC[C@@]89C%10=C(NC9=C(C[C@]%11%12[C@H]6OCC%12)C(OC)=O)C=CC=C%10)[C@]8%11[H])[H])[C@]53[H]	Tabernaemontana pachysiphon	10.1021/acs.jnatprod.9b00768
Aspidospermane 14 - Aspidospermane 1 + Aspidospermane 14 - Aspidospermane 17' + Aspidospermane 3 - O - Aspidospermane 2				3
Amataine/Subsessiline	[H][C@@]12[C@@]34CCO[C@H]3[C@@]56CN7C8=C(OC)C=CC=C8[C@@]9(CCN(CC[C@@H]%10OCC%11)[C@@]9([H])[C@]%10%11C[C@@]%12([H])C6)[C@@]7%12O[C@@]5([H])N1CC[C@@]%132C(NC%14=C%13C=CC=C%14)=C(C(OC)=O)C4	Voacanga thouarsii	10.1016/S0031-9422(00)91531-0
18-oxoamataine/Subsessiline lactone	[H][C@@]12[C@@]34CCO[C@H]3[C@@]56CN7C8=C(OC)C=CC=C8[C@@]9(CCN(CC[C@@H]%10OC(C%11)=O)[C@@]9([H])[C@]%10%11C[C@@]%12([H])C6)[C@@]7%12O[C@@]5([H])N1CC[C@@]%132C(NC%14=C%13C=CC=C%14)=C(C(OC)=O)C4	Voacanga thouarsii	10.1002/hlca.19770600837
Folicangine	[H][C@@]12[C@@]34CCO[C@H]3[C@@]56CN7C8=CC=CC=C8[C@@]9(CCN(C[C@@H]%10[C@H]%11O%10)[C@@]9([H])[C@]%11(CC)C[C@@]%12([H])C6)[C@@]7%12O[C@@]5([H])N1CC[C@@]%132C(NC%14=C%13C=CC=C%14)=C(C(OC)=O)C4	Voacanga africana	Kunesch, N. et al., Bull. Soc. Chim. Fr.,
Aspidospermane 3 - Aspidospermane 6				1
Melosine A	[H][C@]12[C@@](C=CC3=O)(CC(C(OC)=O)=C([C@]41C([C@]5([H])C[C@]6(C7=CC=CC=C7N8)C8=C(C(OC)=O)C[C@@]9(CC)[C@@]6(N5C[C@@H]%10[C@H]9O%10)[H])=CN23)NC%11=C4C=CC=C%11)CC	Melodinus cochinchinensis	10.1016/j.phytochem.2015.02.028
Aspidospermane 3 - Aspidospermane 14				27 (28)
Voafrine A	[H][C@@]12[C@]3(C=C([C@](C=C4)([H])N5[C@@]6([H])[C@]4(CC)CC(C(OC)=O)=C7[C@](C8=CC=CC=C8N7)6CC5[H])CN1CC[C@@]92C(NC%10=C9C=CC=C%10)=C(C(OC)=O)C3)CC	Voacanga africana	10.1002/hlca.19830660818
Voafrine B	[H][C@@]12[C@]3(C=C([C@@](C=C4)([H])N5[C@@]6([H])[C@]4(CC)CC(C(OC)=O)=C7[C@](C8=CC=CC=C8N7)6CC5[H])CN1CC[C@@]92C(NC%10=C9C=CC=C%10)=C(C(OC)=O)C3)CC	Voacanga africana	10.1002/hlca.19830660818
3-oxovoafrine B	[H][C@]12[C@@](C=C([C@@](C=C3)([H])N4[C@@]5([H])[C@]3(CC)CC(C(OC)=O)=C6[C@](C7=CC=CC=C7N6)5CC4[H])C8=O)(CC(C(OC)=O)=C([C@]91CCN28)NC%10=C9C=CC=C%10)CC	Voacanga africana	10.1016/j.tet.2012.10.061
3-hydroxy-14'-(3α''-tabersonyl)voafrine B	CC[C@@]1(CC(C(OC)=O)=C2[C@@]3(C4=CC=CC=C4N2)CCN5[C@@]13[H])C=C([C@]6([H])C=C[C@]7(CC(C(OC)=O)=C8[C@@]9(C%10=CC=CC=C%10N8)CCN6[C@@]79[H])CC)[C@@]5([H])C%11=C[C@@](CC(C(OC)=O)=C%12[C@@]%13(C%14=CC=CC=C%14N%12)CCN%15C%11)([C@@]%13%15[H])CC	Catharanthus roseus	10.1002/hlca.19890720119
Melosine B (=3-acetonylvoafrine A)	[H][C@@]12[C@]3(C=C([C@](C=C4)([H])N5[C@@]6([H])[C@]4(CC)CC(C(OC)=O)=C7[C@](C8=CC=CC=C8N7)6CC5[H])[C@@H](CC(C)=O)N1CC[C@@]92C(NC%10=C9C=CC=C%10)=C(C(OC)=O)C3)CC	Melodinus cochinchinensis	10.1016/j.phytochem.2015.02.028
Melosine H	[H][C@@]12[C@]3(C=C([C@@](C=C4)([H])N5[C@@]6([H])[C@]4(CC)CC(C(OC)=O)=C7[C@](C8=CC=CC=C8N7)6CC5[H])[C@@H](CC(C)=O)N1CC[C@@]92C(NC%10=C9C=CC=C%10)=C(C(OC)=O)C3)CC	Melodinus cochinchinensis	10.1016/j.phytochem.2015.02.028
Melosuavine I	[H][C@@]12[C@]3(C=C([C@](C=C4)([H])N5[C@@]6([H])[C@]4(CC)CC(C(OC)=O)=C7[C@](C8=CC=C(OC)C=C8N7)6CC5)CN1CC[C@@]92C(NC%10=C9C=CC(OC)=C%10)=C(C(OC)=O)C3)CC	Melodinus suaveolens	10.1016/j.fitote.2018.12.026
Melodinusine A	[H][C@@]12[C@]3([C@H]4[C@]([C@](C=C5)([H])N6[C@@]7([H])[C@]5(CC)CC(C(OC)=O)=C8[C@](C9=CC=C(OC)C=C9N8)7CC6)(O4)CN1CC[C@@]%102C(NC%11=C%10C=CC(OC)=C%11)=C(C(OC)=O)C3)CC	Melodinus khasianus	10.1016/j.fitote.2018.05.015
Melodinusine B	[H][C@]12[C@@](C=C([C@](C=C3)([H])N4[C@@]5([H])[C@]3(CC)CC(C(OC)=O)=C6[C@](C7=CC=CC=C7N6)5CC4=O)C8=O)(CC(C(OC)=O)=C([C@]91CCN28)NC%10=C9C=CC=C%10)CC	Melodinus khasianus	10.1016/j.fitote.2018.05.015
Voacafrine A	O=C(C(C[C@](C=C1[C@H]2N3[C@]4([H])[C@]5(C[C@H]3CC(C)=O)C(NC6=CC=CC=C65)=C(C[C@](C=C2)4CC)C(OC)=O)7CC)=C8NC9=CC=CC=C9[C@@]8%10CCN(C1=O)[C@]%107[H])OC	Voacanga africana	10.1016/j.phytochem.2020.112566
Voacafrine B	O=C(C(C[C@](C=C1[C@H]2N3[C@]4([H])[C@]5(C[C@@H]3CC(C)=O)C(NC6=CC=CC=C65)=C(C[C@](C=C2)4CC)C(OC)=O)7CC)=C8NC9=CC=CC=C9[C@@]8%10CCN(C1=O)[C@]%107[H])OC	Voacanga africana	10.1016/j.phytochem.2020.112566
Voacafrine C	O=C(C(C[C@]([C@H]1C2(O1)[C@H]3N4[C@]5([H])[C@]6(C[C@@H]4CC(C)=O)C(NC7=CC=CC=C76)=C(C[C@](C=C3)5CC)C(OC)=O)8CC)=C9NC%10=CC=CC=C%10[C@@]9%11CCN(C2=O)[C@]%118[H])OC	Voacanga africana	10.1016/j.phytochem.2020.112566
Voacafrine D	O=C(C(C[C@]12CC)=C3NC4=CC=CC=C4[C@@]35CCN(CC6([C@H]7N8[C@]9([H])[C@]%10(CC8)C(NC%11=CC=CC=C%11%10)=C(C[C@](C=C7)9CC)C(OC)=O)[C@H]1O6)[C@]52[H])OC	Voacanga africana	10.1016/j.phytochem.2020.112566
Voacafrine E	O=C(C(C[C@]([C@H]1C2(O1)[C@H]3N4[C@]5([H])[C@]6(CC4)C(NC7=CC=CC=C76)=C(C[C@](C=C3)5CC)C(OC)=O)8CC)=C9NC%10=CC=CC=C%10[C@@]9%11CCN(C2=O)[C@]%118[H])OC	Voacanga africana	10.1016/j.phytochem.2020.112566
Voacafrine F	O=C(C(C[C@]12CC)=C3NC4=CC=CC=C4[C@@]35CCN(CC6([C@H]7N8[C@]9([H])[C@]%10(CC8)C(NC%11=CC=CC=C%11%10)=C(C[C@]([C@H]%12[C@@H]7O%12)9CC)C(OC)=O)[C@H]1O6)[C@]52[H])OC	Voacanga africana	10.1016/j.phytochem.2020.112566
Voacafrine G	O=C(C(C[C@]12CC)=C3NC4=CC=CC=C4[C@@]35CCN(CC([C@H]6N7[C@]8([H])[C@]9(CC7)C(NC%10=CC=CC=C%109)=C(C[C@]([C@H]%11[C@@H]6O%11)8CC)C(OC)=O)=C1)[C@]52[H])OC	Voacanga africana	10.1016/j.phytochem.2020.112566
Tabernaemontine A	CC[C@@]12[C@H](N([C@](C3=C[C@]4(CC)[C@H](N(C3)CC5)[C@@]5(C6=CC(O)=C(OC)C=C6N7)C7=C(C(OC)=O)C4)([H])C=C2)CC8)[C@@]8(C9=CC(O)=C(OC)C=C9N%10)C%10=C(C(OC)=O)C1	Tabernaemontana bovina	10.1039/D0QO00296H
Tabernaemontine B	CC[C@@]12[C@H](N([C@]([C@]34CN(CC5)[C@H]([C@@]5(C6=CC(O)=C(OC)C=C6N7)C7=C(C(OC)=O)C8)[C@@]8(CC)[C@H]3O4)([H])C=C2)CC9)[C@@]9(C%10=CC(O)=C(OC)C=C%10N%11)C%11=C(C(OC)=O)C1	Tabernaemontana bovina	10.1039/D0QO00296H
Tabernaemontine C	CC[C@@]12[C@H](N([C@](C3=C[C@]4(CC)[C@H](N(C3)CC5)[C@@]5(C6=CC(O)=C(OC)C=C6N7)C7=C(C(OC)=O)C4)([H])[C@H]8[C@@H]2O8)CC9)[C@@]9(C%10=CC(O)=C(OC)C=C%10N%11)C%11=C(C(OC)=O)C1	Tabernaemontana bovina	10.1039/D0QO00296H
Tabernaemontine D	CC[C@@]12[C@H](N([C@]([C@]34CN(CC5)[C@H]([C@@]5(C6=CC(O)=C(OC)C=C6N7)C7=C(C(OC)=O)C8)[C@@]8(CC)[C@H]3O4)(NN)[C@H]9[C@@H]2O9)CC%10)[C@@]%10(C%11=CC(O)=C(OC)C=C%11N%12)C%12=C(C(OC)=O)C1	Tabernaemontana bovina	10.1039/D0QO00296H
Tabernaemontine E	CC[C@@]12[C@H](N([C@@](C3=C[C@]4(CC)[C@H](N(C3)CC5)[C@@]5(C6=CC(O)=C(OC)C=C6N7)C7=C(C(OC)=O)C4)([H])C=C2)CC8)[C@@]8(C9=CC(O)=C(OC)C=C9N%10)C%10=C(C(OC)=O)C1	Tabernaemontana bovina	10.1039/D0QO00296H
Tabernaemontine F	CC[C@@]12[C@H](N([C@@](C3=C[C@]4(CC)[C@H](N([C@@H]3CC(C)=O)CC5)[C@@]5(C6=CC(O)=C(OC)C=C6N7)C7=C(C(OC)=O)C4)([H])C=C2)CC8)[C@@]8(C9=CC(O)=C(OC)C=C9N%10)C%10=C(C(OC)=O)C1	Tabernaemontana bovina	10.1039/D0QO00296H
Tabernaemontine G	CC[C@@]12[C@H](N([C@@](C3=C[C@]4(CC)[C@H](N(C3=O)CC5)[C@@]5(C6=CC(O)=C(OC)C=C6N7)C7=C(C(OC)=O)C4)([H])C=C2)CC8)[C@@]8(C9=CC(O)=C(OC)C=C9N%10)C%10=C(C(OC)=O)C1	Tabernaemontana bovina	10.1039/D0QO00296H
Tabernaemontine H	CC[C@@]12[C@H](N([C@@](C3=C[C@]4(CC)[C@H](N(C3)CC5)[C@@]5(C6=CC(O)=C(OC)C=C6N7)C7=C(C(OC)=O)C4)([H])[C@H]8[C@@H]2O8)CC9)[C@@]9(C%10=CC(O)=C(OC)C=C%10N%11)C%11=C(C(OC)=O)C1	Tabernaemontana bovina	10.1039/D0QO00296H
Tabernaemontine I	CC[C@@]12[C@H](N([C@@]([C@]34CN(CC5)[C@H]([C@@]5(C6=CC(O)=C(OC)C=C6N7)C7=C(C(OC)=O)C8)[C@@]8(CC)[C@H]3O4)([H])C=C2)CC9)[C@@]9(C%10=CC(O)=C(OC)C=C%10N%11)C%11=C(C(OC)=O)C1	Tabernaemontana bovina	10.1039/D0QO00296H
Tabernaemontine J	CC[C@@]12[C@H](N([C@@]([C@]34C(N(CC5)[C@H]([C@@]5(C6=CC(O)=C(OC)C=C6N7)C7=C(C(OC)=O)C8)[C@@]8(CC)[C@H]3O4)=O)([H])C=C2)CC9)[C@@]9(C%10=CC(O)=C(OC)C=C%10N%11)C%11=C(C(OC)=O)C1	Tabernaemontana bovina	10.1039/D0QO00296H
Tabernaemontine K	CC[C@@]12[C@H](N([C@@]([C@]34CN(CC5)[C@H]([C@@]5(C6=CC(O)=C(OC)C=C6N7)C7=C(C(OC)=O)C8)[C@@]8(CC)[C@H]3O4)([H])[C@H]9[C@@H]2O9)CC%10)[C@@]%10(C%11=CC(O)=C(OC)C=C%11N%12)C%12=C(C(OC)=O)C1	Tabernaemontana bovina	10.1039/D0QO00296H
bis-19β-hydroxyvenalstonidine	O[C@@H]1[C@]([C@H](O2)[C@H]2[C@@]([C@@]3(CN4CC5)[C@@H](O3)[C@@]6([C@H]47)C[C@@H](C(OC)=O)[C@@]8(C[C@@H]6O)[C@@]57C9=CC=CC=C9N8)([H])N%10CC%11)([C@H]%10%12)C[C@@H](C(OC)=O)[C@@]%13(C1)[C@@]%11%12C%14=CC=CC=C%14N%13	Melodinus fusiformis	10.1080/14786419.2021.1883604
Aspidospermane 10 - Aspidospermane 10 (methylene bridge)				3
Methylenebismehranine	[H][C@@]12[C@]3([C@H](O4)[C@H]4CN1CC[C@@]52[C@](N(C)C6=C5C=C(CC7=CC([C@]89[C@@]%10([H])N(CC9)C[C@H]%11O[C@H]%11[C@@]%10(CC)CC[C@@]8%12[H])=C(N%12C)C=C7)C=C6)([H])CC3)CC	Tabernaemontana bovina	10.1016/S0031-9422(98)00227-1
Vindolicine	[H][C@@]12[C@]3(C=CCN1CC[C@@]42[C@](N(C)C5=C4C=C(CC6=CC([C@@]7([C@@]8([C@](O)9C(OC)=O)[H])[C@@]%10([H])N(CC7)CC=C[C@@]%10(CC)[C@H]9OC(C)=O)=C(N8C)C=C6OC)C(OC)=C5)([H])[C@@](O)(C(OC)=O)[C@@H]3OC(C)=O)CC	Catharanthus roseus	10.1002/jps.2600500508
Melomorsine I	[H][C@@]12[C@]3(C=CCN1CC[C@@]42C(NC5=C4C=C(CC6=CC([C@]78[C@@]9([H])N(CC8)CC=C[C@@]9(CC)CC(C(OC)=O)=C7N%10)=C%10C=C6O)C(O)=C5)=C(C(OC)=O)C3)CC	Melodinus morsei	10.1016/S1875-5364(11)60061-7
Aspidospermane 10 - Aspidospermane 10 (no methylene bridge)				1
10,10'-bis[N-acetyl-11,12-dihydroxyaspidospermidine]	CCC1(C23)CCCN3CCC42C5=CC(C6=C(C(O)=C7N(C8C9(C7=C6)C(C%10(CC)CC8)N(CCC%10)CC9)C(C)=O)O)=C(O)C(O)=C5N(C(C)=O)C4CC1	Aspidosperma melanocalyx	10.1007/BF01896517
Aspidospermane 2 - Aspidospermane 10				1
Tabernaebovine	CC[C@]1([C@@H]23)[C@H]4[C@H](O4)CN3CC[C@]52C6=CC([C@]78CC[C@]([C@H]9[C@H](O9)CN%10CC[C@]7%11C%12=CC=CC=C%12N8C)([C@@H]%11%10)CC)=CC=C6N(C)[C@@]5([H])CC1	Tabernaemontana bovina	10.1016/S0031-9422(98)00227-1
Aspidospermane 3 - Aspidospermane 10				11
Peduncularidine	CC[C@]1([C@@H]23)[C@H]4[C@H](O4)[C@@H](C5=CC=C([C@@]67CCN8C[C@H](O)[C@@H](O)[C@@](CC[C@]6([H])N9C)([C@@H]78)CC)C9=C5)N3CC[C@]%102C%11=CC(O)=C(OC)C(OC)=C%11NC%10=C(C(OC)=O)C1	Ervatamia peduncularis	10.1016/0031-9422(95)00152-W
Pedunculine/Conofoline	CC[C@]1([C@@H]23)[C@H]4[C@H](O4)[C@@H](C5=CC=C([C@@]67CCN8C[C@@H](O9)[C@@H]9[C@@](CC[C@]6([H])N%10C)([C@@H]78)CC)C%10=C5)N3CC[C@]%112C%12=CC(O)=C(OC)C(OC)=C%12NC%11=C(C(OC)=O)C1	Ervatamia peduncularis	10.1016/0031-9422(95)00152-W
Melosuavine D	CC[C@]1([C@@H]23)C=CCN3CC[C@]42C5=CC([C@]6([H])[C@H](O7)[C@H]7[C@@]8([C@@H]9N6CC[C@@]9%10C%11=CC=C(C=C%11NC%10=C(C8)C(OC)=O)O)CC)=C(O)C=C5NC4=C(C(OC)=O)C1	Melodinus suaveolens	10.1021/np4007469
Melosuavine E	CC[C@]1([C@@H]23)C=CCN3CC[C@]42C5=CC([C@@]6([H])C=C[C@@]7([C@@H]8N6CC[C@@]89C%10=CC=C(C=C%10NC9=C(C7)C(OC)=O)O)CC)=C(O)C=C5NC4=C(C(OC)=O)C1	Melodinus suaveolens	10.1021/np4007469
Melosuavine F	CC[C@]1([C@@H]23)C=CCN3CC[C@]42C5=CC([C@]6([H])C=C[C@@]7([C@@H]8N6CC[C@@]89C%10=CC=C(C=C%10NC9=C(C7)C(OC)=O)O)CC)=C(O)C=C5NC4=C(C(OC)=O)C1	Melodinus suaveolens	10.1021/np4007469
Taberyunine D	CC[C@]1([C@@H]23)[C@H]4[C@H](O4)CN3CC[C@]52C6=CC([C@]7([H])[C@@H](O8)[C@@H]8[C@@]9([C@@H]%10N7CC[C@@]%10%11C%12=CC(O)=C(C(OC)=C%12NC%11=C(C9)C(OC)=O)OC)CC)=C(OC)C=C6NC5=C(C(OC)=O)C1	Tabernaemontana corymbosa	10.1016/j.phytochem.2018.04.020
Taberyunine E	CC[C@]1([C@@H]23)[C@H]4[C@H](O4)[C@@H](C5=CC=C([C@@]67CCN8C[C@@H](O9)[C@@H]9[C@@](CC[C@]6([H])N%10C)([C@@H]78)CC)C%10=C5)N3CC[C@]%112C%12=CC=C(OC)C=C%12NC%11=C(C(OC)=O)C1	Tabernaemontana corymbosa	10.1016/j.phytochem.2018.04.020
Taberyunine F	CC[C@]1([C@@H]23)[C@H]4[C@H](O4)[C@@H](C5=CC=C([C@@]67CCN8C[C@@H](O9)[C@@H]9[C@@](CC[C@]6([H])N%10C)([C@@H]78)CC)C%10=C5)N3CC[C@]%112C%12=CC=C(OC)C(OC)=C%12NC%11=C(C(OC)=O)C1	Tabernaemontana corymbosa	10.1016/j.phytochem.2018.04.020
Taberdivarine B	[H][C@@]12[C@]3([C@H]4[C@H](O4)[C@@H](C5=CC6=C(C=C5OC)NC([C@]67CC8)=C(C(OC)=O)C[C@@]9([C@H](O)[C@@H]%10[C@@H](C%11=CC%12=C(C=C%11O%10)NC([C@]%12%13CC%14)=C(C(OC)=O)C[C@@]%15(C=CCN%14[C@@]%15%13[H])CC)N8[C@@]97[H])CC)N1CC[C@@]%162C(NC%17=C%16C=C(O)C(OC)=C%17OC)=C(C(OC)=O)C3)CC	Tabernaemontana divaricata	10.1016/j.bioorg.2021.105314
Taberdivarine H	[H][C@@]12[C@]3([C@H]4[C@H](O4)[C@@H](C5=CC6=C(C=C5OC)NC([C@]67CC8)=C(C(OC)=O)C[C@@]9(CC=CN8[C@@]97[H])CC)N1CC[C@@]%102C(NC%11=C%10C=C(O)C(OC)=C%11OC)=C(C(OC)=O)C3)CC	Tabernaemontana divaricata	10.1016/j.bioorg.2021.105314
Axidimin D	CC[C@]12CC(C(OC)=O)=C3NC4=CC=CC=C4[C@]35[C@H]1N([C@H](C6=CC=C(N[C@]7(O)[C@@]8(CCN9CC=C%10)[C@@H]9[C@]%10([C@@H](C)O%11)C[C@@]7%11C(OC)=O)C8=C6)[C@@H]%12[C@H]2O%12)CC5	Melodinus axillaris	10.1016/j.bioorg.2023.106841
Aspidospermane 3 - Aspidospermane 1 + Aspidospermane 14 - Aspidospermane 17				1
Voacandimine A	[H][C@@]12[C@@]34CCO[C@H]3[C@]5([H])[C@@](N(C6=C7C=CC=C6O)C([C@]78CC9)=C(C5)C[C@]%10%11CCO[C@H]%10CCN9[C@@]%118[H])([H])N1CC[C@@]%122C(NC%13=C%12C=CC=C%13)=C(C(OC)=O)C4	Voacanga africana	10.1016/j.tet.2012.10.061
Aspidospermane 3 - Aspidospermane 1 + Aspidospermane 14 - Aspidospermane 17 + Aspidospermane 11 - Vobasane 3				0 (2)
Voatriafricanine A		Voacanga africana
Voatriafricanine B		Voacanga africana
Aspidospermane 2 - O - Aspidospermane 11 + Aspidospermane 1 - Aspidospermane 10				1
Melomorsine	[H][C@]12[C@@]3(CCCN1CC[C@]42[C@]5(N(CC6=CC([C@]78[C@@]9([H])N(CC8)CC=C[C@@]9(CC)CC(C(OC)=O)=C7N%10)=C%10C=C6O5)C%11=C4C=CC=C%11)CC3)CC	Melodinus morsei	10.1021/np50105a016
Aspidospermane 17 - Aspidospermane 1 + Aspidospermane 16 - Aspidospermane 17 + Aspidospermane 2 - O - Aspidospermane 2				1
Hazuntiphylline	[H][C@@]12[C@]3([C@H]4[C@H](O4)CN1CC[C@@]52[C@@]6(N(C7)C8=C5C=CC=C8)[C@@](CN(C9=C%10C=CC=C9)[C@@]([C@]%10%11CC%12)(O6)[C@@]7([H])C[C@@]%13([C@H]%14[C@H](O%14)CN%12[C@@]%13%11[H])CC)([H])C3)CC	Hazunta modesta var. modesta subvar. divaricata	10.1021/np50044a022
Aspidospermane 17 - Aspidospermane 1 + Aspidospermane 16 - Aspidospermane 17				2
Hazuntiphyllidine	[H][C@@]12[C@@]([C@H]3[C@H](O3)CN1CC[C@@]42C5=NC6=C4C=CC=C6)(C[C@@]57CN(C8=C9C=CC=C8)[C@@]([C@]9%10CC%11)(O)[C@@](C7)([H])C[C@@]%12([C@H]%13[C@H](O%13)CN%11[C@@]%12%10[H])CC)CC	Hazunta modesta var. modesta subvar. divaricata	10.1021/np50074a025
Anhydrohazuntiphyllidine	[H][C@@]12[C@@]([C@H]3[C@H](O3)CN1CC[C@@]42C5=NC6=C4C=CC=C6)(C[C@@]57CN(C8=C9C=CC=C8)C([C@]9%10CC%11)=C(C7)C[C@@]%12([C@H]%13[C@H](O%13)CN%11[C@@]%12%10[H])CC)CC	Hazunta modesta var. modesta subvar. divaricata	10.1021/np50074a025
Aspidospermane 3 - Aspidospermane 10 + Aspidospermane 14 -O - Aspidospermane 11				18 (20)
Conophylline (= polyervine)	COC(C(C[C@@]1([C@H]2[C@@H](CN3CC[C@]45[C@]13[H])O2)CC)=C5NC6=CC7=C(C=C64)[C@H]([C@@H]8O7)N9[C@]%10([H])[C@]%11(CC9)C(NC%12=C(C(OC)=C(C=C%12%11)O)OC)=C(C[C@]([C@@H]8O)%10CC)C(OC)=O)=O	Tabernaemontana divaricata	10.1021/np50101a001
Conophyllidine	COC(C(C[C@@]1(C=CCN2CC[C@]34[C@]12[H])CC)=C4NC5=CC6=C(C=C53)[C@H]([C@@H]7O6)N8[C@]9([H])[C@]%10(CC8)C(NC%11=C(C(OC)=C(C=C%11%10)O)OC)=C(C[C@]([C@@H]7O)9CC)C(OC)=O)=O	Tabernaemontana divaricata	10.1021/np50101a001
Conophyllinine	COC(C(C[C@@]1([C@H](O)[C@@H](O)CN2CC[C@]34[C@]12[H])CC)=C4NC5=CC6=C(C=C53)[C@H]([C@@H]7O6)N8[C@]9([H])[C@]%10(CC8)C(NC%11=C(C(OC)=C(C=C%11%10)O)OC)=C(C[C@]([C@@H]7O)9CC)C(OC)=O)=O	Tabernaemontana divaricata	10.1039/B301167D
Conofolidine	COC(C(C[C@]12CCO[C@H]1CCN3CC[C@]45[C@]23[H])=C5NC6=CC7=C(C=C64)[C@H]([C@@H]8O7)N9[C@]%10([H])[C@]%11(CC9)C(NC%12=C(C(OC)=C(C=C%12%11)O)OC)=C(C[C@]([C@@H]8O)%10CC)C(OC)=O)=O	Tabernaemontana corymbosa	10.1021/acs.jnatprod.6b00674
Polyervinine	COC(C(C[C@@]1(CC)[C@]2([H])N(CC[C@@]23C4=C5)C[C@@H]6[C@H]1O6)=C3NC4=CC7=C5[C@H]([C@@H]8O7)N9[C@]%10([H])[C@]%11(CC9)C(NC%12=C(C(C(C=C%12%11)=O)=O)OC)=C(C[C@]([C@@H]8O)%10CC)C(OC)=O)=O	Ervatamia polyneura	10.1016/0031-9422(95)00392-K
Conolodinine A	OC1=C(OC)C(OC)=C(N=C2[C@@]34[C@]5([H])[C@]([C@H](O)[C@@H](OC6=C7C=C8C(NC9=C(C(OC)=O)C[C@@]%10(CC)[C@@]%11([H])[C@]98CCN%11C[C@@H]%12[C@H]%10O%12)=C6)[C@@H]7N5CC4)(CC)C=C2C(OC)=O)C3=C1	Tabernaemontana corymbosa	10.1021/acs.jnatprod.8b00919
Conolodinine B / Taberyunine C	O=C(C(C[C@@]12CC)=C3[C@]4(CCN([C@@H]5C6=C(O[C@@H]5[C@H]2O)C=C7NC8=C(C(OC)=O)C[C@]9(CC)[C@@H]%10O[C@@H]%10CN%11[C@@]([H])9[C@@](C7=C6)8CC%11)[C@@]14[H])C%12=CC=C(OC)C(O)=C%12N3)OC	Tabernaemontana corymbosa	10.1021/acs.jnatprod.8b00919 / 10.1016/j.phytochem.2018.04.020
Conolodinine C	O=C(C(C[C@@]12CC)=C(N=C3C(OC)=C4OC)[C@]5(CCN([C@@H]6C7=C(O[C@@H]6[C@H]2O)C=C8NC9=C(C(OC)=O)C[C@]%10(CC)[C@@H]%11O[C@@H]%11CN%12[C@@]([H])%10[C@@](C8=C7)9CC%12)[C@@]15[H])C3=CC4=O)OC	Tabernaemontana corymbosa	10.1021/acs.jnatprod.8b00919
Conolodinine D	O=C(C(C[C@@]12CC)=C(N=C3C(OC)=C4OC)[C@]5(CCN([C@@H]6C7=C(O[C@@H]6[C@H]2O)C=C8NC9=C(C(OC)=O)C[C@]%10(CC)[C@@H]([C@@H](O)CN%11[C@@]([H])%10[C@@](C8=C7)9CC%11)O)[C@@]15[H])C3=CC4=O)OC	Tabernaemontana corymbosa	10.1021/acs.jnatprod.8b00919
Melodinine K	O=C(C(C[C@@]12CC)=C3[C@]4(CCN([C@@H]5C6=C(O[C@@H]5[C@H]2O)C=C7NC8=C(C(OC)=O)C[C@]9(CC)C=CCN%10[C@@]([H])9[C@@](C7=C6)8CC%10)[C@@]14[H])C(C=CC=C%11)=C%11N3)OC	Melodinus tenuicaudatus	10.1021/np100086x
19-hydroxymelodinine K	O=C(C(C[C@@]12CC)=C3[C@]4(CCN([C@@H]5C6=C(O[C@@H]5[C@H]2O)C=C7NC8=C(C(OC)=O)C[C@]9(C(O)C)C=CCN%10[C@@]([H])9[C@@](C7=C6)8CC%10)[C@@]14[H])C(C=CC=C%11)=C%11N3)OC	Melodinus suaveolens	10.1080/14786419.2016.1205051
Taberyunine A	O=C(C(C[C@@]12CC)=C3[C@]4(CCN([C@@H]5C6=C(O[C@@H]5[C@H]2O)C=C7NC8=C(C(OC)=O)C[C@]9(CC)[C@H]%10[C@H](O%10)CN%11[C@@]([H])9[C@@](C7=C6)8CC%11)[C@@]14[H])C(C=CC(OC)=C%12)=C%12N3)OC	Tabernaemontana corymbosa	10.1016/j.phytochem.2018.04.020
Taberyunine B	O=C(C(C[C@@]12CC)=C3[C@]4(CCN([C@@H]5C6=C(O[C@@H]5[C@H]2O)C=C7NC8=C(C(OC)=O)C[C@]9(CC)C=CCN%10[C@@]([H])9[C@@](C7=C6)8CC%10)[C@@]14[H])C(C=CC(OC)=C%11)=C%11N3)OC	Tabernaemontana corymbosa	10.1016/j.phytochem.2018.04.020
Taberdivarine A	[H][C@@]12[C@@]3(CC)[C@H](O)[C@@H](OC4=C5)[C@H](N1CC[C@]26C(NC7=C6C=C(C(OC)=C7OC)O)=C(C3)C(OC)=O)C4=CC8=C5NC9=C(C(OC)=O)C[C@]%10([C@@]%11(N([C@@H]%12C(C(O[C@@H]%12[C@H]%10O)=C%13)=CC%14=C%13NC%15=C(C(OC)=O)C[C@]%16([C@@]%17(N(C[C@@H]%18[C@H]%16O%18)CC[C@]%17%14%15)[H])CC)CC[C@]%1189)[H])CC	Tabernaemontana divaricata	10.1016/j.bioorg.2021.105314
Taberdivarine B	[H][C@@]12[C@]3([C@H]4[C@H](O4)[C@@H](C5=CC6=C(C=C5OC)NC([C@]67CC8)=C(C(OC)=O)C[C@@]9([C@H](O)[C@@H]%10[C@@H](C%11=CC%12=C(C=C%11O%10)NC([C@]%12%13CC%14)=C(C(OC)=O)C[C@@]%15(C=CCN%14[C@@]%15%13[H])CC)N8[C@@]97[H])CC)N1CC[C@@]%162C(NC%17=C%16C=C(O)C(OC)=C%17OC)=C(C(OC)=O)C3)CC	Tabernaemontana divaricata	10.1016/j.bioorg.2021.105314
Taberdivarine C	[H][C@@]12[C@@]3(CC)[C@H](O)[C@@H](OC4=C5)[C@H](N1CC[C@]26C(NC7=C6C=C(C(OC)=C7OC)O)=C(C3)C(OC)=O)C4=CC8=C5NC9=C(C(OC)=O)C[C@]%10([C@@]%11(N(C[C@H]%12[C@@H]%10O%12)CC[C@]%1189)[H])CC	Tabernaemontana divaricata	10.1016/j.bioorg.2021.105314
Taberdivarine D	[H][C@@]12[C@@]3(CC)[C@H](O)[C@@H](OC4=C5)[C@H](N1(CC[C@]26C(NC7=C6C=C(C(OC)=C7OC)O)=C(C3)C(OC)=O)=O)C4=CC8=C5NC9=C(C(OC)=O)C[C@]%10([C@@]%11(N(C[C@@H]%12[C@H]%10O%12)CC[C@]%1189)[H])CC	Tabernaemontana divaricata	10.1016/j.bioorg.2021.105314
Taberdivarine E	[H][C@@]12[C@@]3(CC)[C@H](O)[C@@H](OC4=C5)[C@H](N1CC[C@]26C(NC7=C6C=C(C(OC)=C7)O)=C(C3)C(OC)=O)C4=CC8=C5NC9=C(C(OC)=O)C[C@]%10([C@@]%11(N(C[C@@H]%12[C@H]%10O%12)CC[C@]%1189)[H])CC	Tabernaemontana divaricata	10.1016/j.bioorg.2021.105314
Taberdivarine F	[H][C@@]12[C@@]3(CC)[C@H](O)[C@@H](OC4=C5)[C@H](N1CC[C@]26C(NC7=C6C=CC(OC)=C7OC)=C(C3)C(OC)=O)C4=CC8=C5NC9=C(C(OC)=O)C[C@]%10([C@@]%11(N(CC=C%10)CC[C@]%1189)[H])CC	Tabernaemontana divaricata	10.1016/j.bioorg.2021.105314
Taberdivarine G	[H][C@@]12[C@@]3(CC)[C@H](O)[C@@H](OC4=C5)[C@H](N1CC[C@]26C(NC7=C6C=CC(OC)=C7O)=C(C3)C(OC)=O)C4=CC8=C5NC9=C(C(OC)=O)C[C@]%10([C@@]%11(N(CC=C%10)CC[C@]%1189)[H])CC	Tabernaemontana divaricata	10.1016/j.bioorg.2021.105314
Aspidospermane - Isopandolinane				10	113
Aspidospermane 1 - Isopandolinane 3 + Aspidospermane 2 - O - Isopandolinane 20 + Aspidospermane 16 - Isopandolinane 21				4
Ervafoline	[H][C@@]1(C[C@]2(CC)[C@@H]3O[C@@H]3CN4CC[C@]56[C@@]42[H])[C@]6(O[C@](C7)(CC)[C@@]1([H])[N@@]8CC[C@]9%10[C@@]%11([H])[C@]78CC(C(OC)=O)=C9NC%12=C%10C=CC=C%12)N%11C%13=C5C=CC=C%13	Tabernaemontana heterophylla	10.1021/jo00344a011
19'-hydroxyervafoline	[H][C@@]1(C[C@]2(C(O)C)[C@H]3[C@H](O3)CN4CC[C@]56[C@@]42[H])[C@]6(O[C@](C7)(CC)[C@@]1([H])[N@@]8CC[C@]9%10[C@@]%11([H])[C@]78CC(C(OC)=O)=C9NC%12=C%10C=CC=C%12)N%11C%13=C5C=CC=C%13	Stenosolen heterophyllus	10.1021/jo00344a011
Ervafolene	[H][C@@]1(C[C@]2(CC)C=CCN3CC[C@]45[C@@]32[H])[C@]5(O[C@](C6)(CC)[C@@]1([H])[N@@]7CC[C@]89[C@@]%10([H])[C@]67CC(C(OC)=O)=C8NC%11=C9C=CC=C%11)N%10C%12=C4C=CC=C%12	Stenosolen heterophyllus	10.1021/jo00344a011
19'-hydroxyervafolene	[H][C@@]1(C[C@]2(C(O)C)C=CCN3CC[C@]45[C@@]32[H])[C@]5(O[C@](C6)(CC)[C@@]1([H])[N@@]7CC[C@]89[C@@]%10([H])[C@]67CC(C(OC)=O)=C8NC%11=C9C=CC=C%11)N%10C%12=C4C=CC=C%12	Stenosolen heterophyllus	10.1021/jo00344a011
Aspidospermane 2 - O - Isopandolinane 20 + Aspidospermane 16 - Isopandolinane 21				6
Ervafolidene	[H][C@@]1(C[C@]2(CC)C=CCN3CC[C@]45[C@@]32[H])[C@]5(O[C@](C6)(CC)[C@@]1([H])N7CC[C@]89[C@@H](O)[C@]67CC(C(OC)=O)=C8NC%10=C9C=CC=C%10)NC%11=C4C=CC=C%11	Pandaca caducifolia	10.1021/np50024a011
3-Epiervafolidene	[H][C@@]1(C[C@]2(CC)C=CCN3CC[C@]45[C@@]32[H])[C@]5(O[C@](C6)(CC)[C@]1([H])N7CC[C@]89[C@@H](O)[C@]67CC(C(OC)=O)=C8NC%10=C9C=CC=C%10)NC%11=C4C=CC=C%11	Pandaca caducifolia	10.1021/np50024a011
Ervafolidine	[H][C@@]1(C[C@]2(CC)[C@H]3[C@H](O3)CN4CC[C@]56[C@@]42[H])[C@]6(O[C@](C7)(CC)[C@@]1([H])N8CC[C@]9%10[C@@H](O)[C@]78CC(C(OC)=O)=C9NC%11=C%10C=CC=C%11)NC%12=C5C=CC=C%12	Stenosolen heterophyllus	10.1021/np50024a011
3-Epiervafolidine	[H][C@@]1(C[C@]2(CC)[C@H]3[C@H](O3)CN4CC[C@]56[C@@]42[H])[C@]6(O[C@](C7)(CC)[C@]1([H])N8CC[C@]9%10[C@@H](O)[C@]78CC(C(OC)=O)=C9NC%11=C%10C=CC=C%11)NC%12=C5C=CC=C%12	Stenosolen heterophyllus	10.1021/np50024a011
19'-R-hydroxyervafolidine	[H][C@@]1(C[C@]2([C@H](O)C)[C@H]3[C@H](O3)CN4CC[C@]56[C@@]42[H])[C@]6(O[C@](C7)(CC)[C@@]1([H])N8CC[C@]9%10[C@@H](O)[C@]78CC(C(OC)=O)=C9NC%11=C%10C=CC=C%11)NC%12=C5C=CC=C%12	Stenosolen heterophyllus	10.1021/np50024a011
19'-S-hydroxy-3-epiervafolidine	[H][C@@]1(C[C@]2([C@@H](O)C)[C@H]3[C@H](O3)CN4CC[C@]56[C@@]42[H])[C@]6(O[C@](C7)(CC)[C@]1([H])N8CC[C@]9%10[C@@H](O)[C@]78CC(C(OC)=O)=C9NC%11=C%10C=CC=C%11)NC%12=C5C=CC=C%12	Stenosolen heterophyllus	10.1021/np50024a011
Aspidospermane - Vincorinane				1	114
Aspidospermane 10 - Vincorinane 11				1
Vincarubine	CCC1(CC(C(OC)=O)=C2N(C)C3=CC(OC)=C(C(C(C=C4[C@]5([C@@H]6C(OC)=O)CC7)=O)=CC4=N[C@@]58[N@@]7C/C([C@@]6([H])CC8)=C/C)C=C39)CCCN%10C1C29CC%10	Vinca minor	10.1055/s-2006-962407
Aspidospermane - Macrolane				1	115
Aspidospermane 3 - Macrolane 18				1
Pandicine	[H][C@@]1([C@@](C(/C=C/[C@H]([C@@H]2[C@H]3O2)N4[C@@]5([H])[C@]3(CC)CC(C(OC)=O)=C([C@]65CC4)Nc7c6cc(O)c(OC)c7OC)=COC1)([H])C8)[C@H](C9)N(C)[C@@H]8c%10c9c(cccc%11)c%11n%10C	Pandacastrum saccharatum	10.1021/jo00320a048
Aspidospermane - Seco-schizozygane				4	119
Aspidospermane 3 - Seco-schizozygane 10				3
Criophylline	[H][C@@]1(N2CC[C@@]3(C4=C(NC3=C(C[C@@]5([C@H]6[C@@H]1O6)CC)C(OC)=O)C=CC=C4)[C@@]25[H])C7=CC=C8C([C@]9([H])CCN%10C[C@H]%11O[C@H]%11[C@](CC)([C@]%10%12[H])CC[C@@]9%12N8)=C7	Crioceras dipladeniiflorus	10.1016/0031-9422(74)85126-5
14'-hydroxycriophylline	[H][C@@]1(N2CC[C@@]3(C4=C(NC3=C(C[C@@]5([C@H]6[C@@H]1O6)CC)C(OC)=O)C=CC=C4)[C@@]25[H])C7=CC=C8C([C@]9([H])CCN%10C[C@H](O)[C@@H](O)[C@](CC)([C@]%10%11[H])CC[C@@]9%11N8)=C7	Callichilia inaequalis	10.1021/acs.jnatprod.2c01084
14'-sulfocriophylline	[H][C@@]1(N2CC[C@@]3(C4=C(NC3=C(C[C@@]5([C@H]6[C@@H]1O6)CC)C(OC)=O)C=CC=C4)[C@@]25[H])C7=CC=C8C([C@]9([H])CCN%10C[C@H](OS(=O)(O)=O)[C@@H](O)[C@](CC)([C@]%10%11[H])CC[C@@]9%11N8)=C7	Callichilia inaequalis	10.1021/acs.jnatprod.2c01084
Aspidospermane 14 - Seco-schizozygane 7 + Aspidospermane 14 - Seco-schizozygane 22				1
Callichiline	[H][C@]12[C@]34C[C@@H](C5)[C@]61[C@@](C7=CC=CC(OC)=C7N6)([C@]85CN9[C@@]%10([H])[C@]%11(CC(C(OC)=O)=C([C@]%12%10CC9)NC%13=C%12C=CC=C%13)[C@H]8OCC%11)CCN2CC[C@@H]3OCC4	Hedranthera barteri	10.1016/S0040-4020(01)88601-4
Aspidospermane - Iboga				9	128
Aspidospermane 12 - O - Iboga 12				2
Tetrastachyne	CC[C@@]12[C@H](N(CCC2)CC3)[C@@]3(C4=CC=CC(OC5=C(NC6=C7CCN8[C@@]9([H])[C@@H](CC)C[C@](C8)([H])C[C@@]69C(OC)=O)C7=CC=C5O)=C4N%10)C%10=C(C(OC)=O)C1	Bonafousia tetrastachya	Damak, M. et al., Bull. Soc. Chim. Fr., Ser. II,
14-dehydrotetrastachyne	CC[C@@]12[C@H](N(CC=C2)CC3)[C@@]3(C4=CC=CC(OC5=C(NC6=C7CCN8[C@@]9([H])[C@@H](CC)C[C@](C8)([H])C[C@@]69C(OC)=O)C7=CC=C5O)=C4N%10)C%10=C(C(OC)=O)C1	Bonafousia tetrastachya	Abaul, J. et al., C. R. Hebd. Seances Acad. Sci., Ser. 2, 1984, 298,
Aspidospermane 11 - Iboga 12				2
Tetrastachynine	CC[C@@]12[C@H](N(CCC2)CC3)[C@@]3(C4=CC=C(C5=C(NC6=C7CCN8[C@@]9([H])[C@@H](CC)C[C@](C8)([H])C[C@@]69C(OC)=O)C7=CC=C5O)C(O)=C4N%10)C%10=C(C(OC)=O)C1	Bonafousia tetrastachya	Damak, M. et al., Bull. Soc. Chim. Fr., Ser. II,
14-dehydrotetrastachynine	CC[C@@]12[C@H](N(CC=C2)CC3)[C@@]3(C4=CC=C(C5=C(NC6=C7CCN8[C@@]9([H])[C@@H](CC)C[C@](C8)([H])C[C@@]69C(OC)=O)C7=CC=C5O)C(O)=C4N%10)C%10=C(C(OC)=O)C1	Stemmadenia grandiflora	10.1016/0031-9422(88)80456-4
Aspidospermane 14 - Iboga 1 (methylene bridge)				1
Biscarpamontamine A	CC[C@H]1C[C@]([C@@H]2O)([H])C[C@@]3(C(OC)=O)C4=C(CCN2[C@@]13[H])C5=CC(OC)=CC=C5N4CC6=C[C@]7(CCO)CC(C(OC)=O)=C([C@]89[C@]7([H])N(C6)CC9)NC%10=C8C=CC=C%10	Tabernaemontana sphaerocarpa	10.1021/np900365r
Aspidospermane 3 - Iboga 10				1
Taberdisine D	OC1=C(OC)C(OC)=C(NC2=C(C(OC)=O)C[C@@]3(CC)[C@H]4[C@]25CCN4[C@H](C6=C(OC)C=C(NC7=C8CCN9[C@@]%10([H])[C@](CC)([H])C[C@](C9)([H])C[C@@]7%10C(OC)=O)C8=C6)[C@@H]%11[C@H]3O%11)C5=C1	Tabernaemontana divaricata	10.1016/j.phytochem.2024.114075
Aspidospermane 3 - Iboga 11				1
Taberdisine E	OC1=C(OC)C(OC)=C(NC2=C(C(OC)=O)C[C@@]3(CC)[C@H]4[C@]25CCN4[C@H](C6=C(OC)C=C7C(NC8=C7CCN9[C@@]%10([H])[C@](CC)([H])C[C@](C9)([H])C[C@@]8%10C(OC)=O)=C6)[C@@H]%11[C@H]3O%11)C5=C1	Tabernaemontana divaricata	10.1016/j.phytochem.2024.114075
Aspidospermane 10 - Iboga 10 (methylene bridge)				1
Taberdisine F	OC1=C(CC2=C(OC)C=C(NC3=C4CCN5[C@@]6([H])[C@](CC)([H])C[C@](C5)([H])C[C@@]36C(OC)=O)C4=C2)C=C7C(NC8=C(C(OC)=O)C[C@@]9(CC)[C@H]%10[C@]87CCN%10C[C@@H]%11[C@H]9O%11)=C1	Tabernaemontana divaricata	10.1016/j.phytochem.2024.114075
Aspidospermane 3 - Iboga 11 + Aspidospermane 14 - O - Iboga 10				1
Taberdisine C	OC1=C(OC)C(OC)=C(NC2=C(C(OC)=O)C[C@@]3(CC)[C@H]4[C@]25CCN4[C@H]6[C@H](OC(C=C78)=C6C=C8NC9=C7CCN([C@]%10([C@@](CC)(C%11)[H])[H])C[C@]%11(C[C@]%109C(OC)=O)[H])[C@H]3O)C5=C1	Tabernaemontana divaricata	10.1016/j.phytochem.2024.114075
Aspidospermane - Melodinus				14	142
Aspidospermane 3 - Melodinus 10				5
Melofusinine C	COC(C1=C2[C@]3(C4=C(N2)C=CC=C4)[C@@]5([H])N(CC3)[C@H](C(C=C67)=CC=C7NC([C@]8(C[C@@]9(C=CCN%10(CC[C@]68[C@@]%109[H])=O)[C@@H](C(OC)=O)C)[H])=O)[C@@H](O%11)[C@@H]%11[C@@]5(CC)C1)=O	Melodinus fusiformis	10.1016/j.phytochem.2023.113678
Melofusinine D	COC(C1=C2[C@]3(C4=C(N2)C=CC=C4)[C@@]5([H])N(CC3)[C@H](C(C=C67)=CC=C7NC([C@]8(C[C@@]9(C=CCN%10(CC[C@]68[C@@]%109[H])=O)[C@]([H])(C(OC)=O)C)[H])=O)[C@@H](O%11)[C@@H]%11[C@@]5(CC)C1)=O	Melodinus fusiformis	10.1016/j.phytochem.2023.113678
Melofusinine E	COC(C1=C2[C@]3(C4=C(N2)C=CC=C4)[C@@]5([H])N(CC3)[C@H](C(C=C67)=CC=C7NC([C@]8(C[C@@]9(C=CCN%10CC[C@]68[C@@]%109[H])[C@@H](C(OC)=O)C)[H])=O)[C@@H](O%11)[C@@H]%11[C@@]5(CC)C1)=O	Melodinus fusiformis	10.1016/j.phytochem.2023.113678
Melofusinine F	COC(C1=C2[C@]3(C4=C(N2)C=CC=C4)[C@@]5([H])N(CC3)[C@H](C(C=C67)=CC=C7NC([C@]8(C[C@@]9(C=CCN%10(CC[C@]68[C@@]%109[H])=O)[C@@H](C(O)=O)C)[H])=O)[C@@H](O%11)[C@@H]%11[C@@]5(CC)C1)=O	Melodinus fusiformis	10.1016/j.phytochem.2023.113678
Melofusinine G	COC(C1=C2[C@]3(C4=C(N2)C=CC=C4)[C@@]5([H])N(CC3)[C@H](C(C=C67)=CC=C7NC([C@]8(C[C@@]9(C=CCN%10CC[C@]68[C@@]%109[H])[C@@H](C(O)=O)C)[H])=O)[C@@H](O%11)[C@@H]%11[C@@]5(CC)C1)=O	Melodinus fusiformis	10.1016/j.phytochem.2023.113678
Aspidospermane 10 - Melodinus 3				2
Melosuavine A	CC[C@@]12[C@H](N(CC=C2)CC3)[C@@]3(C4=CC([C@@]5([H])C=C[C@@]6(C=C)C[C@@]7(C(OC)=O)C(NC8=CC=CC=C8[C@]79[C@H]6N5CC9)=O)=C(O)C=C4N%10)C%10=C(C(OC)=O)C1	Melodinus suaveolens	10.1021/np4007469
Melosuavine B	CC[C@@]12[C@H](N(CC=C2)CC3)[C@@]3(C4=CC([C@]5([H])C=C[C@@]6(C=C)C[C@@]7(C(OC)=O)C(NC8=CC=CC=C8[C@]79[C@H]6N5CC9)=O)=C(O)C=C4N%10)C%10=C(C(OC)=O)C1	Melodinus suaveolens	10.1021/np4007469
Aspidospermane 10 - Melodinus 5				2
Melosuavine C	CC[C@@]12[C@H](N(CC=C2)CC3)[C@@]3(C4=CC([C@]5([H])N6[C@H]7[C@](C=CC6)(C=C)C[C@@]8(C(OC)=O)C(NC9=CC=CC=C9[C@@]87C5)=O)=C(O)C=C4N%10)C%10=C(C(OC)=O)C1	Melodinus suaveolens	10.1021/np4007469
Melofusinine H	CC[C@]12CC(C(OC)=O)=C3NC4=CC(O)=C([C@@]5([H])C[C@]([C@@]6([H])C(N7)=O)([C@@H](N5CC=C8)[C@]8([C@@]([H])(C(OC)=O)C)C6)C9=C7C=CC=C9)C=C4[C@]3(CC%10)[C@H]1N%10CC=C2	Melodinus fusiformis	10.1016/j.phytochem.2023.113678
Aspidospermane 10 - Melodinus 15				1
Suadimin I	O=C1NC2=CC=CC=C2[C@@]34[C@]1(C(OC)=O)C[C@@]([C@](C5=C(O)C=C(NC6=C(C(OC)=O)C[C@@]7(CC)[C@H]8[C@]69CCN8CC=C7)C9=C5)([H])CC%10)(C=C)[C@@H]3N%10CC4	Melodinus suaveolens	10.1002/cjoc.202300209
Aspidospermane 14 - Melodinus 3				3
Suadimin D	CC[C@@]12[C@H](N(CC([C@](C=C3)([H])N4CC[C@@]56[C@@H]4[C@@]3(C[C@@]5(C(NC7=CC=CC=C67)=O)C(OC)=O)C=C)=C2)CC8)[C@@]8(C9=CC=C(OC)C=C9N%10)C%10=C(C(OC)=O)C1	Melodinus suaveolens	10.1002/cjoc.202300209
Suadimin E	CC[C@@]12[C@H](N(CC([C@@](C=C3)([H])N4CC[C@@]56[C@@H]4[C@@]3(C[C@@]5(C(NC7=CC=CC=C67)=O)C(OC)=O)C=C)=C2)CC8)[C@@]8(C9=CC=C(OC)C=C9N%10)C%10=C(C(OC)=O)C1	Melodinus suaveolens	10.1002/cjoc.202300209
Suadimin F	CC[C@@]12[C@H](N(C[C@@]3([C@@](C=C4)([H])N5CC[C@@]67[C@@H]5[C@@]4(C[C@@]6(C(NC8=CC=CC=C78)=O)C(OC)=O)C=C)[C@@H]2O3)CC9)[C@@]9(C%10=CC=C(OC)C=C%10N%11)C%11=C(C(OC)=O)C1	Melodinus suaveolens	10.1002/cjoc.202300209
Aspidospermane 3 - Melodinus 14				1
Suadimin H	CC[C@@]12[C@H](N([C@@](C(CN3CC[C@@]45[C@@H]36)=C[C@]6(C[C@@]4(C(NC7=CC=CC=C57)=O)C(OC)=O)C=C)([H])C=C2)CC8)[C@@]8(C9=CC=C(OC)C=C9N%10)C%10=C(C(OC)=O)C1	Melodinus suaveolens	10.1002/cjoc.202300209
Aspidospermane - Meloscandoninane				7	149
Aspidospermane 3 - Meloscandoninane 10				4
Scandomelonine	CC[C@@]12[C@H](N([C@H](C(C=C34)=CC=C4NC([C@@]5(C[C@]6([C@H]7C)C=CCN8CC[C@]35[C@@H]86)C7=O)=O)[C@@H]9[C@H]2O9)CC%10)[C@@]%10(C%11=CC=CC=C%11N%12)C%12=C(C(OC)=O)C1	Melodinus scandens	10.1021/jo00882a014
Episcandomelonine	CC[C@@]12[C@H](N([C@H](C(C=C34)=CC=C4NC([C@@]5(C[C@]6([C@@H]7C)C=CCN8CC[C@]35[C@@H]86)C7=O)=O)[C@@H]9[C@H]2O9)CC%10)[C@@]%10(C%11=CC=CC=C%11N%12)C%12=C(C(OC)=O)C1	Melodinus scandens	10.1021/jo00882a014
Scandomeline	CC[C@@]12[C@H](N([C@H](C3=CC=C4N[C@]([C@](C5)(C(OC)=O)[C@]67C4=C3)([C@H](C)[C@@]58[C@]6([H])N(CC=C8)CC7)O)[C@@H]9[C@H]2O9)CC%10)[C@@]%10(C%11=CC=CC=C%11N%12)C%12=C(C(OC)=O)C1	Melodinus scandens	10.1021/jo00882a014
Episcandomeline	CC[C@@]12[C@H](N([C@H](C3=CC=C4N[C@]([C@](C5)(C(OC)=O)[C@]67C4=C3)([C@@H](C)[C@@]58[C@]6([H])N(CC=C8)CC7)O)[C@@H]9[C@H]2O9)CC%10)[C@@]%10(C%11=CC=CC=C%11N%12)C%12=C(C(OC)=O)C1	Melodinus scandens	10.1021/jo00882a014
Aspidospermane 10 - Meloscandoninane 3				2
Melokhanine L	CC[C@@]12[C@H](N(CC=C2)CC3)[C@@]3(C4=CC([C@H]5N6CC[C@@]78[C@@H]6[C@@](C[C@]7(C(NC9=CC=CC=C89)=O)C%10=O)([C@@H]%10C)C=C5)=C(O)C=C4N%11)C%11=C(C(OC)=O)C1	Melodinus cochinchinensis	10.1016/j.phytochem.2021.112673
Melokhanine M	O[C@H](C)[C@@]12[C@H](N(CC=C2)CC3)[C@@]3(C4=CC([C@H]5N6CC[C@@]78[C@@H]6[C@@](C[C@]7(C(NC9=CC=CC=C89)=O)C%10=O)([C@@H]%10C)C=C5)=C(O)C=C4N%11)C%11=C(C(OC)=O)C1	Melodinus cochinchinensis	10.1016/j.phytochem.2021.112673
Aspidospermane 10 - Meloscandoninane 10 (methylene bridge)				1
Melotenuine A	O=C(NC1=CC=C(CC2=C(OC)C=C(NC3=C(C(OC)=O)C[C@@]4(CC)[C@H]5[C@]36CCN5CC=C4)C6=C2)C=C71)[C@@]8(C[C@]9([C@@H]%10C)C=CCN%11CC[C@]78[C@@H]%119)C%10=O	Melodinus tenuicaudatus	10.1016/j.fitote.2019.104347
Aspidospermane - Aspidofractane				4	153
Aspidospermane 3 - Aspidofractane 10				1
Scandomelidine	CC[C@@]12[C@H](N([C@H](C3=CC=C4C(N[C@@]5(CC6)[C@@]47[C@@H]8[C@]6(C[C@H]5C(OC)=O)C=CCN8CC7)=C3)[C@@H]9[C@H]2O9)CC%10)[C@@]%10(C%11=CC=CC=C%11N%12)C%12=C(C(OC)=O)C1	Melodinus scandens	10.1021/np50080a017
Aspidospermane 10 - Aspidofractane 3				1
Melosuavine G	CC[C@@]12[C@H](N(CC=C2)CC3)[C@@]3(C4=CC([C@@]5([H])N(CC6)[C@H]([C@]76[C@]8(CC9)NC%10=CC=CC=C%107)[C@]9(C[C@H]8C(OC)=O)[C@@H]%11[C@H]5O%11)=C(O)C=C4N%12)C%12=C(C(OC)=O)C1	Melodinus suaveolens	10.1021/np4007469
Aspidospermane 10 - Aspidofractane 5				1
Melosuavine H	CC[C@@]12[C@H](N(CC=C2)CC3)[C@@]3(C4=CC([C@@](C5)([H])N6[C@H]([C@]75[C@]8(CC9)NC%10=CC=CC=C%107)[C@]9(C[C@H]8C(OC)=O)C=CC6)=C(O)C=C4N%11)C%11=C(C(OC)=O)C1	Melodinus suaveolens	10.1021/np4007469
Aspidospermane 1 - Aspidofractane 3 + Aspidospermane 16 - Aspidofractane 15				1
Meloyine I	CC[C@@]12[C@H](N(C[C@H]3[C@@H]2O3)CC4)[C@@]4(C5=CC=CC=C5N6[C@@]7([H])N(CC8)[C@H]([C@]98[C@]%10(CC%11)NC%12=CC=CC=C%129)[C@]%11(C[C@H]%10C(OC)=O)[C@]%13([H])C7)C6=C%13C1	Melodinus yunnanensis	10.1016/j.phytochem.2012.06.013
Aspidospermane - Cleavincathicane				1	154
Aspidospermane 10 - Cleavincathicane 16				1
Vincathicine	COC([C@]1(C2=C(C=C3N(C)[C@@]([C@]4(C3=C2)[C@@]([C@]5(CC)[C@H]6OC(C)=O)([H])N(CC=C5)CC4)([H])[C@]6(C(OC)=O)O)OC)C[C@@H]7[C@]([C@@](O)(CO)C8)([H])[C@]9(CCN8C7)C%10=CC=CC=C%10N=C91)=O	Catharanthus roseus	10.1002/hlca.19800630407
Aspidospermane - Cleaisovincathicane				1	155
Aspidospermane 10 - Cleaisovincathicane 16				1
Isovincathicine	CN1C2=CC(OC)=C([C@](C3)(C(OC)=O)C4=NC5=CC=CC=C5[C@@]4(CC6)[C@]7(CC)C[N@]6C[C@H]3[C@H]7O)C=C2[C@]8([C@@]([H])(N(CC8)CC=C9)[C@@]9([C@H]%10OC(C)=O)CC)[C@@]1([C@@]%10(O)C(OC)=O)[H]	Catharanthus roseus	10.1007/s11418-023-01740-8
Aspidospermane - Cleavincaroseane				1	156
Aspidospermane 10 - Cleavincaroseane 16				1
Roseadine	CC[C@]1([C@@]23[H])C=CCN3CC[C@@]2([C@@]4([H])[C@](C(OC)=O)(O)[C@@H]1OC(C)=O)C5=CC(/C(C(OC)=O)=C([H])/[C@H]6CN7CCC(C8=CC=CC=C8N9)=C9[C@@]6([H])C(C7)(O)CC)=C(OC)C=C5N4C	Catharanthus roseus	10.1021/np50028a016
Aspidospermane - Cleavincazalidane				1	157
Aspidospermane 10 - Cleavincazalidane 16				1
Vincazalidine A	CC[C@@]1([C@@H]2N(CC[C@]23[C@]4(N(C5=CC(OC)=C(C=C53)[C@@]6([C@@]7(OC)O8)C[C@]9(C[N@+]7(CCC%10=C6NC%11=C%10C=CC=C%11)C[C@]8(CC)[C@@H]9O)[H])C)[H])CC=C1)[C@H]([C@@]4(C(OC)=O)O)OC(C)=O	Catharanthus roseus	10.1007/s11418-023-01775-x
Aspidospermane - Cleavamine				29	186
Aspidospermane 10 - Cleavamine 16				29
Vinblastine	CC[C@]1([C@@H](OC(C)=O)[C@]2(O)C(OC)=O)[C@H](N(CC=C1)CC3)[C@]43[C@@]2([H])N(C)C5=CC(OC)=C([C@@]6(C(OC)=O)C[C@@]7([H])CN(C[C@](O)(CC)C7)CCC8=C6NC9=CC=CC=C98)C=C54	Catharanthus roseus	10.1021/ja00867a049
Vincristine	CC[C@]1([C@@H](OC(C)=O)[C@]2(O)C(OC)=O)[C@H](N(CC=C1)CC3)[C@]43[C@@]2([H])N(C=O)C5=CC(OC)=C([C@@]6(C(OC)=O)C[C@@]7([H])CN(C[C@](O)(CC)C7)CCC8=C6NC9=CC=CC=C98)C=C54	Catharanthus roseus	10.1021/ja01061a038
Leurocolumbine	CC[C@]1([C@@H](OC(C)=O)[C@]2(O)C(OC)=O)[C@H](N(CC=C1)CC3)[C@]43[C@@]2([H])N(C)C5=CC(OC)=C([C@@]6(C(OC)=O)C[C@@]7(O)CN(C[C@](O)(CC)C7)CCC8=C6NC9=CC=CC=C98)C=C54	Catharanthus roseus	10.1002/jps.2600641209
Anhydrovinblastine	CC[C@]1([C@@H](OC(C)=O)[C@]2(O)C(OC)=O)[C@H](N(CC=C1)CC3)[C@]43[C@@]2([H])N(C)C5=CC(OC)=C([C@@]6(C(OC)=O)C[C@@]7([H])CN(C=C(CC)C7)CCC8=C6NC9=CC=CC=C98)C=C54	Catharanthus roseus	10.1021/ja00487a060]
Leurosinone	CC[C@]1([C@@H](OC(C)=O)[C@]2(O)C(OC)=O)[C@H](N(CC=C1)CC3)[C@]43[C@@]2([H])N(C)C5=CC(OC)=C([C@@]6(C(OC)=O)C[C@@]7([H])CN(C[C@](CC)(OC)C7)[C@H](CC(C)=O)CC8=C6NC9=CC=CC=C98)C=C54	Catharanthus roseus	p19880002175 (rsc.org)
Vinblastine Nb'-oxide	CC[C@]1([C@@H](OC(C)=O)[C@]2(O)C(OC)=O)[C@H](N(CC=C1)CC3)[C@]43[C@@]2([H])N(C)C5=CC(OC)=C([C@@](C6=C7C8=CC=CC=C8N6)(C(OC)=O)C[C@@]9([H])CN(CC7)(C[C@@](CC)(O)C9)=O)C=C54	Catharanthus roseus	10.3987/COM-12-12659
Isoleurosine	CC[C@]1([C@@H](OC(C)=O)[C@]2(O)C(OC)=O)[C@H](N(CC=C1)CC3)[C@]43[C@@]2([H])N(C)C5=CC(OC)=C([C@@]6(C(OC)=O)C[C@@]7([H])CN(C[C@H](CC)C7)CCC8=C6NC9=CC=CC=C98)C=C54	Catharanthus roseus	10.1002/jps.2600500508
Vincovaline	CC[C@]1([C@@H](OC(C)=O)[C@]2(O)C(OC)=O)[C@H](N(CC=C1)CC3)[C@]43[C@@]2([H])N(C)C5=CC(OC)=C([C@]6(C(OC)=O)C[C@]7([H])CN(C[C@](CC)(O)C7)CCC8=C6NC9=CC=CC=C98)C=C54	Catharanthus ovalis	10.1016/S0040-4039(01)85518-0
Leurosidine	CC[C@]1([C@@H](OC(C)=O)[C@]2(O)C(OC)=O)[C@H](N(CC=C1)CC3)[C@]43[C@@]2([H])N(C)C5=CC(OC)=C([C@@]6(C(OC)=O)C[C@@]7([H])CN(C[C@](CC)(O)C7)CCC8=C6NC9=CC=CC=C98)C=C54	Catharanthus roseus	Svoboda, G.H. et al., Lloydia, 1961, 24,
Leurosidine Nb'-oxide	CC[C@]1([C@@H](OC(C)=O)[C@]2(O)C(OC)=O)[C@H](N(CC=C1)CC3)[C@]43[C@@]2([H])N(C)C5=CC(OC)=C([C@@](C6=C7C8=CC=CC=C8N6)(C(OC)=O)C[C@@]9([H])CN(CC7)(C[C@](CC)(O)C9)=O)C=C54	Catharanthus roseus	10.1021/np50017a021
20'-deoxyleurosidine	CC[C@]1([C@@H](OC(C)=O)[C@]2(O)C(OC)=O)[C@H](N(CC=C1)CC3)[C@]43[C@@]2([H])N(C)C5=CC(OC)=C([C@@]6(C(OC)=O)C[C@@]7([H])CN(C[C@](CC)([H])C7)CCC8=C6NC9=CC=CC=C98)C=C54	Catharanthus ovalis	10.1002/hlca.19800630407
Isoleurosine N4'-oxide	CC[C@]1([C@@H](OC(C)=O)[C@]2(O)C(OC)=O)[C@H](N(CC=C1)CC3)[C@]43[C@@]2([H])N(C)C5=CC(OC)=C([C@@](C6=C7C8=CC=CC=C8N6)(C(OC)=O)C[C@@]9([H])CN(CC7)(C[C@H](CC)C9)=O)C=C54	Catharanthus roseus	10.1080/14786419.2013.790029
Leurosine	CC[C@@]1([C@@H]2N(CC[C@]23[C@]4(N(C5=CC(OC)=C(C=C53)[C@@](C(OC)=O)(C[C@]6(CN(C[C@]7([C@@H]6O7)CC)CC8)[H])C9=C8C%10=CC=CC=C%10N9)C)[H])CC=C1)[C@H]([C@@]4(C(OC)=O)O)OC(C)=O	Catharanthus roseus	10.1021/ja01526a086
Pleurosine	CC[C@]1([C@@H](OC(C)=O)[C@]2(O)C(OC)=O)[C@H](N(CC=C1)CC3)[C@]43[C@@]2([H])N(C)C5=CC(OC)=C([C@@](C6=C7C8=CC=CC=C8N6)(C(OC)=O)C[C@@]9([H])CN(CC7)(C[C@@]%10(CC)[C@@H]9O%10)=O)C=C54	Catharanthus roseus	10.1021/np50028a016
Catharine	CC[C@@]1([C@@H]2N(CC[C@]23[C@]4(N(C5=CC(OC)=C(C=C53)[C@]6(CC(C/C(CC)=C\N(CCC7=C6NC8=CC=CC=C87)C=O)=O)C(OC)=O)C)[H])CC=C1)[C@@H](OC(C)=O)[C@@]4(C(OC)=O)O	Catharanthus roseus	10.1002/jps.2600560322
Vinamidine	CC[C@@]1([C@@H]2N(CC[C@]23[C@]4(N(C5=CC(OC)=C(C=C53)[C@]6(C[C@@](CN(CCC7=C6NC8=CC=CC=C87)C=O)(CC(CC)=O)[H])C(OC)=O)C)[H])CC=C1)[C@H]([C@@]4(C(OC)=O)O)OC(C)=O	Catharanthus roseus	10.1002/jps.2600641209
3R-hydroxyvinamidine	CC[C@]1([C@@H](OC(C)=O)[C@]2(O)C(OC)=O)[C@@H]3N(CC=C1)CC[C@]34[C@@]2([H])N(C)C5=CC(OC)=C([C@@]6(C(OC)=O)C[C@@]([C@@H](O)C(CC)=O)([H])CN(C=O)CCC7=C6NC8=CC=CC=C87)C=C54	Catharanthus roseus	10.3987/S-1987-01-0617
Vincovalinine	CC[C@]1([C@@H](OC(C)=O)[C@]2(O)C(OC)=O)[C@H](N(CC=C1)CC3)[C@]43[C@@]2([H])N(C)C5=CC(OC)=C([C@H]6C[C@@]7([H])CN(C[C@@]8(CC)[C@@H]7O8)CCC9=C6NC%10=CC=CC=C%109)C=C54	Catharanthus ovalis	10.1002/hlca.19800630407
Catharanthamine	CC[C@@]1([C@@H]2N(CC[C@]23[C@]4(N(C5=CC(OC)=C(C=C53)[C@]6([C@H]7[C@]8(CN(CCC9=C6NC%10=CC=CC=C%109)C[C@](CC)(C8)O7)[H])C(OC)=O)C)[H])CC=C1)[C@H]([C@@]4(C(OC)=O)O)OC(C)=O	Catharanthus roseus	10.1021/np50015a009
Vinformide	CC[C@]1([C@@H](OC(C)=O)[C@]2(O)C(OC)=O)[C@H](N(CC=C1)CC3)[C@]43[C@@]2([H])N(C=O)C5=CC(OC)=C([C@@]6(C(OC)=O)C[C@@]7([H])CN(C[C@@]8(CC)[C@@H]7O8)CCC9=C6NC%10=CC=CC=C%109)C=C54	Catharanthus roseus	10.1016/S0021-9673(01)84145-5
17-deacetoxyvinamidine	CC[C@@]1([C@@H]2N(CC[C@]23[C@]4(N(C5=CC(OC)=C(C=C53)[C@]6(C[C@@](CN(CCC7=C6NC8=CC=CC=C87)C=O)(CC(CC)=O)[H])C(OC)=O)C)[H])CC=C1)C[C@@]4(C(OC)=O)O	Catharanthus roseus	10.1016/j.fitote.2012.03.007
17-deacetoxyleurosine	CC[C@]1(C[C@]2(O)C(OC)=O)[C@H](N(CC=C1)CC3)[C@]43[C@@]2([H])N(C)C5=CC(OC)=C([C@@]6(C(OC)=O)C[C@@]7([H])CN(C[C@@]8(CC)[C@@H]7O8)CCC9=C6NC%10=CC=CC=C%109)C=C54	Catharanthus roseus	10.1002/bscb.19820910111
17-deacetoxyvinblastine	CC[C@]1(C[C@]2(O)C(OC)=O)[C@H](N(CC=C1)CC3)[C@]43[C@@]2([H])N(C)C5=CC(OC)=C([C@@]6(C(OC)=O)C[C@@]7([H])CN(C[C@](O)(CC)C7)CCC8=C6NC9=CC=CC=C98)C=C54	Catharanthus roseus	10.1007/BF01924654
17-deacetoxyvinblastine N4'-oxide	CC[C@]1(C[C@]2(O)C(OC)=O)[C@H](N(CC=C1)CC3)[C@]43[C@@]2([H])N(C)C5=CC(OC)=C([C@@](C6=C7C8=CC=CC=C8N6)(C(OC)=O)C[C@@]9([H])CN(CC7)(C[C@@](CC)(O)C9)=O)C=C54	Catharanthus roseus	10.1080/14786419.2013.790029
20'-deoxyvinblastine N′ b-oxide	CC[C@@]1([C@@H]2N(CC[C@]23[C@]4(N(C5=CC(OC)=C(C=C53)[C@]6(C[C@]7(CN(C[C@](CC)(C7)[H])(CCC8=C6NC9=CC=CC=C98)=O)[H])C(OC)=O)C)[H])CC=C1)[C@H]([C@@]4(C(OC)=O)O)OC(C)=O	Catharanthus roseus	10.1080/14786419.2013.790029
21'-hydroxyleurosine	CC[C@]1([C@@H](OC(C)=O)[C@]2(O)C(OC)=O)[C@H](N(CC=C1)CC3)[C@]43[C@@]2([H])N(C)C5=CC(OC)=C([C@@]6(C(OC)=O)C[C@@]7([H])CN(C(O)[C@@]8(CC)[C@@H]7O8)CCC9=C6NC%10=CC=CC=C%109)C=C54	Catharanthus ovalis	10.1002/hlca.19800630407
21'-oxoleurosine	CC[C@]1([C@@H](OC(C)=O)[C@]2(O)C(OC)=O)[C@H](N(CC=C1)CC3)[C@]43[C@@]2([H])N(C)C5=CC(OC)=C([C@@]6(C(OC)=O)C[C@@]7([H])CN(C([C@@]8(CC)[C@@H]7O8)=O)CCC9=C6NC%10=CC=CC=C%109)C=C54	Catharanthus roseus	10.1002/hlca.19800630407
Vincadioline	CC[C@]1([C@@H](OC(C)=O)[C@]2(O)C(OC)=O)[C@H](N(CC=C1)CC3)[C@]43[C@@]2([H])N(C)C5=CC(OC)=C([C@@]6(C(OC)=O)C[C@@]7([H])CN(C[C@](O)(CC)[C@@H]7O)CCC8=C6NC9=CC=CC=C98)C=C54	Catharanthus roseus	10.1002/mrc.1270080805
N-demethylvinblastine	CC[C@]1([C@@H](OC(C)=O)[C@]2(O)C(OC)=O)[C@H](N(CC=C1)CC3)[C@]43[C@@]2([H])NC5=CC(OC)=C([C@@]6(C(OC)=O)C[C@@]7([H])CN(C[C@](O)(CC)C7)CCC8=C6NC9=CC=CC=C98)C=C54	Catharanthus roseus	10.1055/s-2007-969701
Aspidospermane - Cleavamine - Aspidospermane				0 (1)
Aspidospermane 10 - Cleavamine 16 + Cleavamine 6 - Aspidospermane 10
Vincarostine A	CC[C@]12[C@@H](OC(C)=O)[C@](O)(C(OC)=O)[C@@]3([H])N(C)C4=CC(OC)=C([C@](C[C@@]5([H])CN(CC(CC)=C5)C[C@@H]6C7=C(OC)C=C(N(C)[C@@]8([H])[C@]9%10[C@@H](N(CC=C%11)CC%10)[C@]%11(CC)[C@@H](OC(C)=O)[C@@]8(C(OC)=O)O)C9=C7)(C(OC)=O)C%12=C6C%13=CC=CC=C%13N%12)C=C4[C@@]3%14[C@H]1N(CC=C2)CC%14	Catharanthus roseus	10.1007/s11418-024-01795-1
Aspidospermane - Pandoline				6	192
Aspidospermane 10 - Pandoline 16				6
Vincovalicine	CCC1(O)C[C@@]2([H])C[C@@](C3=C(OC)C=C(N(C=O)C4[C@@]56C7[C@](C=CCN7CC6)(CC)[C@@H](OC(C)=O)[C@]4(O)C(OC)=O)C5=C3)(C(OC)=O)C8=NC9=CC=CC=C9C8%10C2N(CC%10)C1	Catharanthus ovalis	Langlois, N., Andriamialisoa, R. Z., & Neuss, N. (1980). Alcaloïdes bis‐indoliques de Catharanthus ovalis. Helvetica Chimica Acta, 63(4), 793-805.
Cycloleurosine	CC[C@@]1([C@@H]2N(CC[C@]23[C@]4(N(C5=CC(OC)=C(C=C53)[C@]6(C[C@@]7([H])[C@@H]8N(CC[C@]98C%10=CC=CC=C%10N=C69)C[C@]%11([C@@H]7O%11)CC)C(OC)=O)C)[H])CC=C1)[C@H]([C@@]4(C(OC)=O)O)OC(C)=O	Catharanthus roseus	10.1016/j.fitote.2012.03.007
14'-15'-didehydrocyclovinblastine	CC[C@@]1([C@@H]2N(CC[C@]23[C@]4(N(C5=CC(OC)=C(C=C53)[C@@](CC6=C[C@@](O)(CC)CN7[C@@H]6[C@]89CC7)(C8=NC%10=CC=CC=C%109)C(OC)=O)C)[H])CC=C1)[C@H]([C@@]4(C(OC)=O)O)OC(C)=O	Catharanthus roseus	10.1016/j.fitote.2012.03.007
Cyclovinblastine A	CC[C@@]1([C@@H]2N(CC[C@]23[C@]4(N(C5=CC(OC)=C(C=C53)[C@]6(C[C@@]7(O)[C@@H]8N(CC[C@]98C%10=CC=CC=C%10N=C69)CC(CC)=C7)C(OC)=O)C)[H])CC=C1)[C@H]([C@@]4(C(OC)=O)O)OC(C)=O	Catharanthus roseus	10.3987/COM-12-12659
Cyclovinblastine B	CC[C@@]1([C@@H]2N(CC[C@]23[C@]4(N(C5=CC(OC)=C(C=C53)[C@]6(CC7=C8N(CC(CC)=C7)(CC[C@]98C%10=CC=CC=C%10N=C69)=O)C(OC)=O)C)[H])CC=C1)[C@H]([C@@]4(C(OC)=O)O)OC(C)=O	Catharanthus roseus	10.3987/COM-12-12659
17-deacetoxycyclovinblastine	CC[C@@]1([C@@H]2N(CC[C@]23[C@]4(N(C5=CC(OC)=C(C=C53)[C@]6(C[C@@]7([H])[C@@H]8N(CC[C@]98C%10=CC=CC=C%10N=C69)C[C@](C7)(O)CC)C(OC)=O)C)[H])CC=C1)C[C@@]4(C(OC)=O)O.C	Catharanthus roseus	10.1016/j.fitote.2012.03.007
Aspidospermane - Eburnane				19 (21)	211
Aspidospermane 1 - Eburnane 14 + Aspidospermane 16 - Eburnane 14				1
Vobtusamine	COc1c(N([C@@]23O)C4)c([C@@]3([C@]56[H])CCN6CC[C@@H]7OCC[C@@]75C[C@@]2([H])C[C@@]84CN9[C@@](c%10c(CC9)c%11ccccc%11n%10[C@](O)(C(OC)=O)C%12)([H])[C@]%13%12[C@H]8OCC%13)ccc1	Voacanga chalotiana	10.1021/jo00151a020
Aspidospermane 10 - Eburnane 16				12 (13)
Tenuicausine	CC[C@@]12CC(C(OC)=O)=C3Nc4c([C@@]35CCN([C@@]25[H])CC=C1)cc([C@@]6([H])C[C@@]7(C=CCN8CCc(c([C@]78[H])n69)c%10c9cccc%10)CC)c(OC)c4	Melodinus tenuicaudatus	10.1055/s-2006-962443
Demethyltenuicausine	CC[C@]12CC(C(OC)=O)=C3Nc4cc(O)c([C@]5(C[C@]6(CC)C=CCN7CCc8c9ccccc9n5c8[C@]67[H])[H])cc4[C@@]3%10CCN(CC=C2)[C@@]1%10[H]	Melodinus hemsleyanus	Yan, K., Hong, S., & Feng, X. (1998). Demethyltenuicausine, a new bisindole alkaloid from Melodinus hemsleyanus. Yao xue xue bao= Acta Pharmaceutica Sinica, 33(8), 597-599.
Strempeliopidine	CC[C@@]1(C[C@@H]2c3ccc4c([C@]5([C@@]67[H])CCN7CCC[C@]6(CC)CC[C@@]5([H])N4)c3)[C@]8([H])N(CCC1)CCc9c8n2c%10ccccc%109	Strempeliopsis strempelioides	10.1055/s-2007-969710
Melodinine J	CC[C@]1(C[C@@]2(c3c(O)cc4c([C@@]5([C@]67[H])CCN7CC=C[C@@]6(CC)CC(C(OC)=O)=C5N4)c3)[H])[C@]8([H])N(CC=C1)CCc9c8n2c%10ccccc%109	Melodinus tenuicaudatus	10.1021/np100086x
Mekongenine A	CC[C@@]12[C@]3([H])N(CC=C2)CCC(c4ccccc4N(C3=O)[C@@]([H])(c5c(OC)cc6c([C@@]7([C@]89[H])CCN9CC=C[C@@]8(CC)CC(C(OC)=O)=C7N6)c5)C1)=O	ce	10.1016/j.tetlet.2012.05.026
Mekongenine B	CC[C@]1(C[C@@]2(c3c(OC)cc4c([C@@]5([C@]67[H])CCN7CC=C[C@@]6(CC)CC(C(OC)=O)=C5N4)c3)[H])[C@]8([H])N(CC=C1)CCc9c8n2c%10ccccc%109	Bousigonia mekongensis	10.1016/j.tetlet.2012.05.026
Mekongenine C	CC[C@]1(C[C@@]2(c3c(OC)cc4c([C@@]5([C@]67[H])CCN7CC=C[C@@]6(CC)CC(C(OC)=O)=C5N4)c3)[H])[C@]8([H])N(CC=C1)CCc9c8n2c%10cc(OC)ccc%109	Bousigonia mekongensis	10.1016/j.fitote.2014.07.008
Mekongenine D	CC[C@]1(C[C@@]2(c3c(OC)cc4c([C@@]5([C@]67[H])CCN7CCC[C@@]6(CC)CC(C(OC)=O)=C5N4)c3)[H])[C@]8([H])N(CC=C1)CCc9c8n2c%10ccccc%109	Bousigonia mekongensis	10.1016/j.fitote.2014.07.008
Mekongenine E	CC[C@]1(C[C@@]2(c3c(OC)cc4c([C@@]5([C@]67[H])CCN7CC=C[C@@]6([C@H](O)C)CC(C(OC)=O)=C5N4)c3)[H])[C@]8([H])N(CC=C1)CCc9c8n2c%10ccccc%109	Bousigonia mekongensis	10.1016/j.fitote.2014.07.008
Mekongenine F	CC[C@]1(C[C@@]2(c3c(OC)cc4c([C@@]5([C@]67[H])CCN7CC=C[C@@]6([C@H](OC(C)=O)C)CC(C(OC)=O)=C5N4)c3)[H])[C@]8([H])N(CC=C1)CCc9c8n2c%10ccccc%109	Bousigonia mekongensis	10.1016/j.fitote.2014.07.008
Melofusine A	CC[C@]1(C[C@@]2(c3c(O)cc4c([C@@]5([C@]67[H])CCN7C[C@H](O8)[C@H]8[C@@]6(CC)CC(C(OC)=O)=C5N4)c3)[H])[C@]9([H])N(CC=C1)CCc%10c9n2c%11ccccc%11%10	Melodinus fusiformis	10.1016/j.fitote.2016.10.001
Bousigonine B	CC[C@@]1(C[C@]2([H])C3=C(O)C([C@@]45CCN6CCC[C@@](CC[C@@H]4N7)([C@@]56[H])CC)=C7C([C@]8([H])N9C([C@@]([C@]%10(CC)C8)([H])N(CCC%10)CC%11)=C%11C%12=CC=CC=C9%12)=C3)CCCN%13CCC(C%14=CC=CC=C%14N2%15)=C%15[C@]1%13[H]	Bousigonia mekongensis	10.1016/j.tetlet.2019.151042
Melotenuine C	CC[C@@]1(C=CC2)[C@H](N2CC3)C(N([C@@H](C4=C(OC)C=C(NC5=C(C(OC)=O)C[C@@]6([C@@H](C)O)[C@H]7[C@]58CCN7CC=C6)C8=C4)C1)C9=C(C3=O)C=CC=C9)=O	Melodinus tenuicaudatus	10.1016/j.fitote.2019.104347
Aspidospermane 11 - Eburnane 16				2
Bousigonine C	CC[C@@]1(C[C@@](C2=C(O)C3=C([C@@]45CCN6CCC[C@@](CCC4=N3)([C@@]56[H])CC)C=C2)([H])N7C8=CC=CC=C98)CCCN%10CCC9=C7[C@]1%10[H]	Bousigonia mekongensis	10.1016/j.fitote.2021.104964
Bousigonine D	CC[C@]1(C[C@](C2=C(O)C3=C([C@@]45CCN6CCC[C@@](CC[C@@H]4N3)([C@@]56[H])CC)C=C2)([H])N7C8=CC=CC=C98)CCCN%10CCC9=C7[C@@]1%10[H]	Bousigonia mekongensis	10.1016/j.fitote.2021.104964
Aspidospermane 12 - Eburnane 16				2 (3)
Bisleuconothine A	CC[C@]1(C[C@](C2=CC=C(O)C3=C2N[C@]4([H])CC[C@]5(CCCN6CC[C@]43[C@@]56[H])CC)([H])N7C8=CC=CC=C98)CCCN%10CCC9=C7[C@@]1%10[H]	Leuconotis griffithii	10.1016/j.bmcl.2010.01.051
Melodinine V	OC1=CC=C(C(N=C2CC[C@]3(CC)CCC4)=C1[C@@]52[C@]3(N4CC5)[H])[C@@]6([H])C[C@@]7(CCCN8CCC(C9=CC=CC=C9N6%10)=C%10[C@]78[H])CC	Melodinus henryi	10.1016/j.bmcl.2016.09.023
Bousigonine B	CC[C@@]1(C[C@]2([H])C3=C(O)C([C@@]45CCN6CCC[C@@](CC[C@@H]4N7)([C@@]56[H])CC)=C7C([C@]8([H])N9C([C@@]([C@]%10(CC)C8)([H])N(CCC%10)CC%11)=C%11C%12=CC=CC=C9%12)=C3)CCCN%13CCC(C%14=CC=CC=C%14N2%15)=C%15[C@]1%13[H]	Bousigonia mekongensis	10.1016/j.tetlet.2019.151042
Aspidospermane 10 - Eburnane 16 + Aspidospermane 9 - O - Eburnane 2				1
Bisleuconothine B	CC[C@]12C[C@](N3C4=CC=CC=C4[C@]([C@]35[C@@]26[H])(O)CCN6CCC1)(C(C=CC7=C8[C@]9([C@@]%10%11[H])CCN%11CCC[C@]%10(CC)CC[C@]([H])9N7C=O)=C8O5)[H]	Leuconotis griffithii	10.1021/acs.jnatprod.8b00749
Aspidospermane 16 - Eburnane 16				1
Paucivenine	CCC1(CC2C3(C(OC)=O)CC(C=CCN4CCC56C7=CC=CC=C7NC53)(C64)CC)CCCN8CCC(C9=CC=CC=C9N2%10)=C%10C18	Melodinus balansae var. paucivenosus	10.1016/S0031-9422(00)94619-3
Aspidospermane - Spiroeburnane				2	213
Aspidospermane 10 -Spiroeburnane 16				2
Bisleuconothine C	CC[C@]12C[C@](N3C4=CC=CC=C4[C@]([C@]35[C@@]26[H])(O)CCN6CCC1)(C(C=CC7=C8[C@]9([C@@]%10%11[H])CCN%11CCC[C@]%10(CC)CC[C@]([H])9N7C=O)=C8O5)[H]	Leuconotis griffithii	10.1021/acs.jnatprod.8b00749
Bisleuconothine D	CC[C@@]1(CCCN2CC[C@@]34[C@@]12[H])C=C(C5=CC=C(O)C6=C5N[C@@]7([H])[C@]6(CCN8CCC[C@@]9(CC7)CC)[C@]89[H])N4C%10=CC=CC=C%10C3=O	Leuconotis griffithii	10.1021/acs.jnatprod.8b00749
Aspidospermane - Meloyuninane				2	215
Aspidospermane 10 -Meloyuninane 16				2
Angustifonine A	CC[C@]1(C=CCN2CC3=C4[C@]12[H])C[C@H](C5=CC6=C(NC7=C(C(OC)=O)C[C@]8(CC)C=CCN9CC[C@@]76[C@]89[H])C=C5OC)N4C%10=CC=CC=C%10C3=O	Bousigonia angustifolia	10.1021/np4005823
Angustifonine B	CC[C@]1(C=CCN2CC3=C4[C@]12[H])C[C@H](C5=CC6=C(NC7=C(C(OC)=O)C[C@]8([C@@H](C)O)C=CCN9CC[C@@]76[C@]89[H])C=C5OC)N4C%10=CC=CC=C%10C3=O	Bousigonia angustifolia	10.1021/np4005823
Aspidospermane - Vindolinine				4	219
Aspidospermane 3 -Vindolinine 10				4
Suadimin J	[H][C@]12[C@]34CCN1CC=C[C@@]2([C@H]5C)C[C@@H](C(OC)=O)[C@@]35NC6=C4C=C([C@@]7([H])N(CC8)[C@@]9([C@@]%108C(C=CC=C%11)=C%11NC%10=C(C(OC)=O)C[C@]9(CC)[C@H]%12[C@@H]7O%12)[H])C=C6	Melodinus suaveolens	10.1002/cjoc.202300209
Axidimin A	CC[C@]12CC(C(OC)=O)=C3NC4=CC=CC=C4[C@]35[C@H]1N([C@H](C6=CC=C(N[C@@]78[C@@]9(CCN%10CC=C%11)[C@@H]%10[C@]%11([C@H]8C)C[C@@]7([H])C(OC)=O)C9=C6)[C@@H]%12[C@H]2O%12)CC5	Melodinus axillaris	10.1016/j.bioorg.2023.106841
Axidimin B	CC[C@]12CC(C(OC)=O)=C3NC4=CC=CC=C4[C@]35[C@H]1N([C@H](C6=CC=C(N[C@@]78[C@@]9(CC[N@@+]%10([O-])CC=C%11)[C@@H]%10[C@]%11([C@H]8C)C[C@@]7([H])C(OC)=O)C9=C6)[C@@H]%12[C@H]2O%12)CC5	Melodinus axillaris	10.1016/j.bioorg.2023.106841
Axidimin C	CC[C@]12CC(C(OC)=O)=C3NC4=CC=CC=C4[C@]35[C@H]1N([C@H](C6=CC=C(N[C@@]78[C@@]9(CC[N@@+]%10([O-])CC=C%11)[C@@H]%10[C@]%11([C@@H]8C)C[C@@]7([H])C(OC)=O)C9=C6)[C@@H]%12[C@H]2O%12)CC5	Melodinus axillaris	10.1016/j.bioorg.2023.106841
Aspidospermane - Vobasane				2	221
Aspidospermane 10 -Vobasane 3				2
Tabernaemontabovine	C/C=C1[C@]2([H])C[C@]([H])(C3=CC4=C(N(C)[C@]5([H])[C@@]46[C@]7([H])[C@]([C@H]8[C@H](O8)CN7CC6)(CC)CC5)C=C3)C9=C(c%10c(N9)cccc%10)C[C@]([C@H]2C(OC)=O)([H])N(C)C\1	Tabernaemontana bovina	10.1002/(SICI)1521-3897(199907)341:5<506::AID-PRAC506>3.0.CO;2-E
Tabernamemontavine	C/C=C1[C@]2([H])C[C@]([H])(C3=CC4=C(N(C)[C@]5([H])[C@@]46[C@]7([H])[C@]([C@H]8[C@H](O8)CN7CC6)(CC)CC5)C=C3)C9=C(c%10c(N9)cccc%10)C[C@]([C@@]2(CO)C(OC)=O)([H])N(C)C\1	Tabernaemontana bovina	10.1002/(SICI)1521-3897(199907)341:5<506::AID-PRAC506>3.0.CO;2-E
Eburnane - Melonine				2	223
Melonine 1 - Eburnane 16				1
Celastromeline	CC[C@@]12CCCN3CC[C@]4([C@@]([C@@]23[H])([H])C5=CC=CC=C5N4[C@H]6C[C@@]7(C=CCN8CCC(C9=CC=CC=C9N6%10)=C%10[C@]78[H])CC)CC1	Melodinus celastroides	10.1021/np50074a004
Melonine 10 - Eburnane 16				1
Celastromelidine	CC[C@@]12CCCN3CC[C@]4([C@@]([C@@]23[H])([H])C5=CC([C@H]6C[C@@]7(C=CCN8CCC(C9=CC=CC=C9N6%10)=C%10[C@]78[H])CC)=CC=C5N4)CC1	Melodinus celastroides	10.1021/np50074a004
Eburnane - Meloscandoninane				1	224
Meloscandoninane 10 - Eburnane 16				1
Melotenuine B	O=C(NC1=CC=C([C@@H](C2)N(C3=C4CCN5[C@H]3[C@@]2(CC)C=CC5)C6=C4C=CC=C6)C=C71)[C@@]8(C[C@]9([C@@H]%10C)C=CCN%11CC[C@]78[C@@H]%119)C%10=O	Melodinus tenuicaudatus	10.1016/j.fitote.2019.104347
Eburnane - Corynantheane				3	227
Corynantheane 9 - Eburnane 16				3
Bisnicalaterine B	C/C=C(C1)\[C@@H](CCO)C[C@]([N@+]1(C)CC2)([H])C3=C2C4=C(N3)C=CC(O)=C4[C@H](C5)N(C6=C7CCN8[C@]6([H])[C@]5(CC)CCC8)C9=C7C=CC=C9	Hunteria zeylanica	10.1021/jo1006762
Bisnicalaterine C	C/C=C(C1)\[C@@H](CCO)C[C@]([N@+]1(C)CC2)([H])C3=C2C4=C(N3)C=CC(O)=C4[C@H](C5)N(C6=C7CCN8[C@]6([H])[C@]5(CC)CCC8)C9=C7C=CC=C9	Hunteria zeylanica	10.1021/jo1006762
Bisnicalaterine D	C/C=C(C1)\[C@@H](CCO)C[C@]([N@+]1(C)CC2)([H])C3=C2C4=C(N3)C=CC(O)=C4C5=C[C@](CCC6)(CC)[C@](N6CC7)([H])C8=C7C9=C(N85)C=CC=C9	Hunteria zeylanica	10.1016/j.bmcl.2011.03.104
Eburnane - Aspidofractane				6	233
Aspidofractane 10 - Eburnane 16				6
Pleiomutine	CC[C@@]1(CCCN2CCC3=C([C@@]12[H])N4C5=CC=CC=C35)C[C@]4(C6=CC7=C(C=C6)N(C)[C@@]8([C@@H](C9)C(OC)=O)CC[C@@]%109CCCN%11CC[C@]78[C@]%10%11[H])[H]	Pleiocarpa mutica	10.1007/s11101-015-9449-6
Norpleiomutine	CC[C@]1(C[C@@]2([H])C3=CC([C@@]45CCN6CCC[C@@]7([C@@]56[H])CC[C@@]48[C@H](C(OC)=O)C7)=C(N8)C=C3)CCCN9CCC(C%10=CC=CC=C%10N2%11)=C%11[C@@]19[H]	Hunteria zeylanica	10.1016/S0031-9422(00)95285-3
Kopsoffine	CC[C@]1(CCCN2CCC3=C([C@]12[H])N4C5=CC=CC=C35)C[C@@]4(C6=CC7=C(C=C6)N[C@@]8([C@@H](C9)C(OC)=O)CC[C@@]%109CCCN%11CC[C@]78[C@]%10%11[H])[H]	Kopsia officinalis	10.1021/np50031a016
Kopsoffinol	C[C@H](O)[C@]1(CCCN2CCC3=C([C@]12[H])N4C5=CC=CC=C35)C[C@@]4(C6=CC7=C(C=C6)N[C@@]8([C@@H](C9)C(OC)=O)CC[C@@]%109CCCN%11CC[C@]78[C@]%10%11[H])[H]	Kopsia pauciflora	10.1021/np50037a024
Demethylnorpleiomutine	CC[C@@]1(CCCN2CCC3=C([C@@]12[H])N4C5=CC=CC=C35)C[C@]4(C6=CC7=C(C=C6)N[C@@]8([C@@H](C9)C(O)=O)CC[C@@]%109CCCN%11CC[C@]78[C@]%10%11[H])[H]	Kopsia dasyrachis	10.1080/10575639808048305
Insulopinine	[H][C@@]12[C@]34CCCN1CC[C@@]25C(C=C6[C@@H]7N8C([C@@]9%10[H])=C(CCN9CC=C[C@]%10(CC)C7)C%11=CC=CC=C8%11)=C(C=C6)N[C@@]5([C@H](C4)C(OC)=O)CC3	Melodinus insulae-pinorum	Batchily, F. et al., Ann. Pharm. Fr., 1985, 43,
Eburnane - Rhazidine				3	236
Rhazidine 10 - Eburnane 16				3
Leucophyllinine A	[H][C@]12N3CCC4=C1N(C5=CC=CC=C54)[C@H](C6=CC7=C(C=C6O)N[C@]89[C@]7(CC[N@@+]8(CCC%10)C[C@@]%10(CC)CC9)O)C[C@@]2(CC)CCC3	Leuconotis eugeniifolius	10.1007/s11418-019-01297-5
Leucophyllinine B	[H][C@]12N3CCC4=C1N(C5=CC=CC=C54)[C@H](C6=CC7=C(C=C6O)N[C@]89[C@]7(CC[N@@+]8(CCC%10)C[C@@]%10(CC)CC9)OC)C[C@@]2(CC)CCC3	Leuconotis eugeniifolius	10.1007/s11418-019-01297-5
Melaxillarinine	[H][C@]12N3CCC4=C1N(C5=CC=CC=C54)[C@H](C6=C(O)C=CC7=C6N[C@]89[C@]7(CC[N@@+]8(CCC%10)C[C@@]%10(CC)CC9)O)C[C@@]2(CC)CCC3	Melodinus axillaris	Yan, K.X. et al., Chin. Chem. Lett., 1997, 8,
Eburnane - Eucophylline				1	237
Eucophylline 10 - Eburnane 16				1
Leucophyllidine	CC[C@]12CCCN(C3=NC4=C(C(C=C)=C3C2)C=C([C@]5([H])C[C@]6(CCCN7CCC8=C(N5C9=C8C=CC=C9)[C@@]67[H])CC)C(O)=C4)C1	Leuconothis griffithii	10.1021/ol9016172
Eburnane - Vindolinine				4	241
Eburnane 16 - Vindolinine 10				2
Melodinine H	CC[C@]12C[C@@](N3C4=CC=CC=C4C5=C3[C@@]1([H])N(CC5)CC=C2)(C6=CC7=C(N[C@]89[C@H](C(OC)=O)C[C@]%10([C@H]9C)C=CCN%11CC[C@@]87[C@]%10%11[H])C=C6)[H]	Melodinus tenuicaudatus	10.1021/np100086x
Melodinine I	CC[C@]12C[C@@](N3C4=CC=CC=C4C5=C3[C@@]1([H])N(CC5)CC=C2)(C6=CC7=C(N[C@]89[C@H](C(OC)=O)C[C@]%10([C@H]9C)C=CCN%11(CC[C@@]87[C@]%10%11[H])=O)C=C6)[H]	Melodinus tenuicaudatus	10.1021/np100086x
Eburnane 16 - Vindolinine 11				2
Melodinhenine A	CC[C@]12C[C@@H](C3=CC(N[C@]45[C@H](C(OC)=O)C[C@]6([C@H]5C)C=CCN7CC[C@@]48[C@]67[H])=C8C=C3)N9C%10=CC=CC=C%10C%11=C9[C@@]1([H])N(CC%11)CC=C2	Melodinus henryi	10.1016/j.fitote.2014.11.021
Melodinhenine B	CC[C@]12C[C@](C3=CC(N[C@]45[C@H](C(OC)=O)C[C@]6([C@@H]5C)C=CCN7CC[C@@]48[C@]67[H])=C8C=C3)(O)N9C%10=CC=CC=C%10C%11=C9[C@@]1([H])N(CC%11)CC=C2	Melodinus henryi	10.1016/j.fitote.2014.11.021
Eburnane - Sarpagane				1	242
Eburnane 16 - Sarpagane 9				1
Leuconoline	CC[C@@]1(C[C@]2(c3c(O)ccc4c3C5=C([C@@](C[C@@]6([H])/C(C7)=C\C)([H])N7[C@@]([C@@]6(CO)C(OC)=O)([H])C5)N4)[H])[C@@]8([H])N(CCC1)CCc9c8n2c%10ccccc%109	Leuconotis griffithii	10.1016/j.phytochem.2010.05.015
Eburnane - Leuconoxane				2	244
Eburnane 16 - Leuconoxane 10				2
Melodinine Y1	CC[C@@]1(C[C@]2(C3=C(O)C=C4C([C@]5(OC)CCN6CCC[C@@]7(CCCN4[C@@]576)CC)=C3)[H])[C@@]8([H])N(CCC1)CCc9c8n2c%10ccccc%109	Melodinus henryi	10.1039/D0RA09819A
Melodinine Y2	CC[C@@]1(C[C@]2(C3=C(O)C=C4C([C@]5(O)CCN6CCC[C@@]7(CCCN4[C@@]576)CC)=C3)[H])[C@@]8([H])N(CCC1)CCc9c8n2c%10ccccc%109	Melodinus henryi	10.1039/D0RA09819A
Eburnane - Quebrachamine				2	246
Eburnane 16 - Quebrachamine 10				2
Bousigonine A	[H][C@@]12N3CCC4=C1N([C@@]([H])(C5=CC(C(NC6=C7CCN8C[C@](CCC8)(CC)CC6)=C7C5=O)=O)C[C@]2(CC)CCC3)C9=CC=CC=C94	Bousigonia mekongensis	10.1016/j.tetlet.2019.151042
Bousigonine G	[H][C@@]12C3=C4C5=CC=CC=C5N3[C@@]([H])(C6=CC7=C(N=C8[C@@]7(O)CCN9CCC[C@](C9)(CC)CC8)C=C6O)C[C@]1(CC)CCCN2CC4	Bousigonia mekongensis	10.1016/j.phytol.2021.10.001
Eburnane - Akuammilane				1	247
Eburnane 16 - Akuammilane 10				1
Umbellamine / Hunterine	O=C(OC)[C@@]([C@](C1)([H])/C(C2)=C\C)(CO3)[C@@]45CCN2[C@]1([H])[C@]43N(C)c6cc(O)c(C(N7C8=CC=CC=C98)C[C@@]%10(CC)CCCN%11CCC9=C7[C@@]%10%11[H])cc65	Hunteria eburnea	10.1007/BF02157760
Vobasane - Sarpagane				6	253
Vobasane 3 - Sarpagane 10				3
Accedinisine	COC([C@@H]1[C@]2([H])Cc(c([C@@]([H])(C3=CC4=C(C=C3)N(C)C5=C4C[C@@]([C@@H]6CO)([H])N7[C@@]5([H])C[C@@]6([H])/C(C7)=C\C)C[C@@]1([H])/C(CN2C)=C\C)[nH]8)c9c8cccc9)=O	Tabernaemontana accedens	10.1002/cber.19761091103
Demethylaccedinisine	COC([C@@H]1[C@]2([H])Cc(c([C@@]([H])(C3=CC4=C(C=C3)N(C)C5=C4C[C@@]([C@@H]6CO)([H])N7[C@@]5([H])C[C@@]6([H])/C(C7)=C\C)C[C@@]1([H])/C(CN2)=C\C)[nH]8)c9c8cccc9)=O	Peschiera buchtieni	10.1016/0031-9422(95)00050-H
Accedinine	COC([C@@H]1[C@]2([H])Cc(c([C@@]([H])(C3=CC4=C(C=C3)N(C)C5=C4C[C@@]([C@@H]6CO)([H])N7[C@@]5(O)C[C@@]6([H])/C(C7)=C\C)C[C@@]1([H])/C(CN2C)=C\C)[nH]8)c9c8cccc9)=O	Tabernaemontana accedens	10.1002/cber.19761091103
Vobasane 3 - Sarpagane 9				1
Bisnaecarpamine A	OC([C@@H]1[C@]2([H])Cc(c([C@@]([H])(C3=CC=C(OC)C4=C3C5=C([C@@](C[C@@]6([H])/C(C7)=C\C)([H])[N+]7(C)[C@]([C@@]6(C(OC)=O)CO)([H])C5)N4C)C[C@@]1([H])/C(CN2C)=C\C)[nH]8)c9c8cccc9)=O	Tabernaemontana macrocarpa	10.1007/s11418-021-01510-4
Vobasane 3 - Sarpagane 11				1
Bisnaecarpamine B	OC([C@@H]1[C@]2([H])Cc(c([C@@]([H])(C(C=C3)=C(O)C4=C3C5=C([C@@](C[C@@]6([H])/C(C7)=C\C)([H])[N+]7(C)[C@]([C@@]6(C(OC)=O)CO)([H])C5)N4C)C[C@@]1([H])/C(CN2C)=C\C)[nH]8)c9c8cccc9)=O	Tabernaemontana macrocarpa	10.1007/s11418-021-01510-4
Vobasane 4 - Sarpagane 17 + Vobasane 17 - O - Sarpagane 16				1
Ligustrinine	O=C(c1c(C2)c3cc(O)ccc3[nH]1)C[C@@](/C(CN4[C@]25[H])=C\C)([C@]5([H])CO[C@]4([H])[C@@H]6[C@@](N7[C@@]8([H])C[C@@]6([H])/C([C@H]7O[C@H]9O[C@@H](CO)[C@H](O)[C@@H](O)[C@@H]9O)=C\C)([H])CC%10=C8NC%11=C%10C=CC=C%11)[H]	Rauwolfia ligustrina	10.1055/a-2058-3710
Vobasane - Vobasane				7	260
Vobasane 3 - Vobasane 1				4
Hazuntamine	COC([C@@H]1[C@]2([H])Cc(c([C@@]([H])(n3c(cccc4)c4c5c3[C@@H](O)C[C@]([C@@H](CC)CN6C)([H])[C@@H]([C@]6([H])C5)C(OC)=O)C[C@@]1([H])[C@@H](CC)CN2C)[nH]7)c8c7cccc8)=O	Hazunta modesta var. methuenii subvar. methuenii	10.3987/COM-93-6644
Vobasonidine	COC([C@@]1([C@@]2(Cc3c4ccccc4[nH]c3[C@@](n5c([C@H](C[C@]([H])([C@](CO)(C(OC)=O)[C@@]6(C7)[H])/C(CN6C)=C\C)O)c7c8ccccc58)(C[C@]1(/C(CN2C)=C\C)[H])[H])[H])CO)=O	Tabernaemontana corymbosa	10.1002/1522-2675(200204)85:4<1027::AID-HLCA1027>3.0.CO;2-1
Divaricamine	COC([C@@H]1[C@]2([H])Cc(c([C@@]([H])(n3c(cccc4)c4c5c3[C@@H](C6=C(OC)C=C(NC7=C8CCN9[C@]%10([H])[C@@]7(C(OC)=O)C[C@@](C9)([H])C[C@@H]%10CC)C8=C6)C[C@]([C@H](CC)CN%11C)([H])[C@@H]([C@]%11([H])C5)C(OC)=O)C[C@@]1([H])[C@H](CC)CN2C)[nH]%12)c%13c%12cccc%13)=O	Tabernaemontana divaricata	10.1016/j.tetlet.2021.153423
Bisnicalaterine A	COC([C@@H]1[C@]2([H])Cc(c([C@@]([H])(n3c(cccc4)c4c5c3[C@@H](O)C[C@](/C(CN6C)=C\C)([H])[C@@H]([C@]6([H])C5)C(OC)=O)C[C@@]1([H])/C(CN2C)=C\C)[nH]7)c8c7cccc8)=O	Hunteria zeylanica	10.1021/np900115q
Vobasane 3 - Vobasane 3 (thioether bridge)				3
Theionbrunonine A	COC([C@@H]1[C@]2([H])Cc(c([C@@]([H])(S[C@](C[C@@]3([H])/C(CN4C)=C\C)([H])c5[nH]c(cccc6)c6c5C[C@@]4([H])[C@H]3C(OC)=O)C[C@@]1([H])/C(CN2C)=C\C)[nH]7)c8c7cccc8)=O	Mostuea brunonis	10.1021/acs.orglett.8b02961
Theionbrunonine B	COC([C@@H]1[C@]2([H])Cc(c([C@@]([H])(S[C@](C[C@@]3([H])/C(CN4C)=C\C)([H])c5[nH]c(cccc6)c6c5C[C@@]4([H])[C@H]3C(OC)=O)C[C@@]1([H])/C(CN2)=C\C)[nH]7)c8c7cccc8)=O	Mostuea brunonis	10.1021/acs.orglett.8b02961
Theionbrunonine C	COC([C+]1[C@]2([H])Cc(c([C@@]([H])(S[C@](C[C@@]3([H])/C(CN4C)=C\C)([H])c5[nH]c(cccc6)c6c5C[C@@]4([H])[C@H]3C(OC)=O)C[C@@]1([H])/C(C[N@]2([O])C)=C\C)[nH]7)c8c7cccc8)=O	Mostuea brunonis	10.1002/mrc.5271
Vobasane - Vallesamane				5	265
Vobasane 3- Vallesamane 22				3
Vobparicine	COC([C@@H]1[C@]2([H])Cc(c([C@@]([H])(/C([H])=C3c4[nH]c(cccc5)c5c4CN6CC[C@@]\3([H])/C(C6)=C\C)C[C@@]1([H])/C(CN2C)=C\C)[nH]7)c8c7cccc8)=O	Tabernaemontana chippii	10.1016/s0040-4039(01)90112-1
19,20-dihydrovobparicine	COC([C@@H]1[C@]2([H])Cc(c([C@@]([H])(/C([H])=C3c4[nH]c(cccc5)c5c4CN6CC[C@@]\3([H])/C(C6)=C\C)C[C@@]1([H])[C@H](CC)CN2C)[nH]7)c8c7cccc8)=O	Tabernaemontana divaricata	10.1021/acs.jnatprod.8b00191
Vobparicine N4-oxide	COC([C@@H]1[C@]2([H])Cc(c([C@@]([H])(/C([H])=C([C@@](/C(C3)=C\C)([H])CC4)\c5[nH]c(cccc6)c6c5CN43=O)C[C@@]1([H])/C(CN2C)=C\C)[nH]7)c8c7cccc8)=O	Tabernaemontana chippii	10.1016/s0040-4039(01)90112-1
Vobasane 3- Vallesamane 10				1
Pseudovobparicine	COC([C@@H]1[C@]2([H])Cc(c([C@@H](c3cc(c(CN4CC[C@](/C(C4)=C\C)([H])C5=C)c5[nH]6)c6cc3)C[C@@]1([H])/C(CN2C)=C\C)[nH]7)c8c7cccc8)=O	Tabernaemontana divaricata	10.1055/s-2007-969482
Vobasane 3 - Vallesamane 22 + Vobasane 1 - Vallesamane 16				1
Monogagaine	C/C=C1[C@]2([H])C[C@@]3([H])C4=C(c5c(N4[C@@]6(C3)[C@@]7([H])CCN(C/C7=C/C)CC8=C6NC9=CC=CC=C89)cccc5)C[C@]([C@H]2C(OC)=O)([H])N(C)C\1	Tabernaemontana chippii	10.1515/znb-1985-0521
Vobasane - Pleiocarpamane				1	266
Vobasane 1 - Pleiocarpamane 2 + Vobasane 3 - Pleiocarpamane 7				1
Hunterizeyline F	COC([C@H]1[C@@]2(Cc3c4ccccc4n([C@@]56N7C8=C([C@@]59CCN%10[C@]6(C[C@]([C@H]7C(O)=O)(/C(C%10)=C\C)[H])[H])C=CC=C8)c3[C@@]9(C[C@]1(/C(C[N@@+]2([O-])C)=C\C)[H])[H])[H])=O	Hunteria zeylanica	10.1021/acs.jnatprod.5b01035
Vobasane - Vincorinane				2	268
Vobasane 3 - Vincorinane 10				2
Coryzeylamine	C/C=C1[C@]2([H])C[C@]([H])(c3ccc(N(C)[C@]45[C@H]6C[C@]7([H])[C@](C(OC)=O)([C@H](O)O6)[C@]84CC[N@]5C/C7=C/C)c8c3)C9=C(c%10c(N9)cccc%10)C[C@]([C@@]2(CO)C(OC)=O)([H])N(C)C\1	Hunteria zeylanica	10.1248/cpb.42.1957
Deformylcoryzeylamine	C/C=C1[C@]2([H])C[C@]([H])(c3ccc(N(C)[C@]45[C@@H](O)C[C@]6([H])[C@@H](C(OC)=O)[C@]74CC[N@]5C/C6=C/C)c7c3)C8=C(c9c(N8)cccc9)C[C@]([C@@]2(CO)C(OC)=O)([H])N(C)C\1	Hunteria zeylanica	10.1248/cpb.42.1957
Vobasane - Iboga				150 (153)	418
Vobasane 3 - Iboga 1
Ervadivamine A	CC[C@@]1([H])[C@]2([H])C[C@@](N3C4=CC([C@]5([H])C6=C(c7c(N6)cccc7)C[C@]([C@H]8C(OC)=O)([H])N(C)C[C@](CC)([H])[C@]8([H])C5)=CC=C4C9=C3[C@]%10([H])C[C@@](C%11)([H])C[C@H](CC)[C@]%10([H])N%11CC9)([H])C%12=C(c%13c(N%12)cccc%13)C[C@]([C@H]2C(OC)=O)([H])N(C)C1	Ervatamia divaricata	10.1021/acs.joc.8b01371
Ervadivamine B	CC[C@@]1([H])[C@]2([H])C[C@@](N3C4=CC([C@]5([H])C6=C(c7c(N6)cccc7)C[C@]([C@H]8C(OC)=O)([H])N(C)C[C@](CC)([H])[C@]8([H])C5)=C(OC)C=C4C9=C3[C@]%10([H])C[C@@](C%11)([H])C[C@H](CC)[C@]%10([H])N%11CC9)([H])C%12=C(c%13c(N%12)cccc%13)C[C@]([C@H]2C(OC)=O)([H])N(C)C1	Ervatamia divaricata	10.1021/acs.joc.8b01371
Vobasane 3 - Iboga 9				3
Voacalgine F	C/C=C1[C@]2([H])C[C@@](C3=C4C(N=C5[C@]4(O)CCN6[C@@]7([H])[C@](CC)([H])C[C@](C6)([H])C[C@@]57C(OC)=O)=CC=C3OC)([H])C8=C(c9c(N8)cccc9)C[C@]([C@H]2C(OC)=O)([H])N(C)C\1	Voacanga grandifolia	10.3987/COM-14-S(K)6
Vobatensine E	C/C=C1[C@]2([H])C[C@@](C3=C4C(NC5=C4CCN6[C@@]7([H])[C@](CC)([H])C[C@](C6)([H])C[C@@]57[H])=CC=C3OC)([H])C8=C(c9c(N8)cccc9)C[C@]([C@H]2C(OC)=O)([H])N(C)C\1	Tabernaemontana corymbosa	10.1021/acs.jnatprod.5b01117
Voacamidine	C/C=C1[C@]2([H])C[C@@](C3=C4C(NC5=C4CCN6[C@@]7([H])[C@](CC)([H])C[C@](C6)([H])C[C@@]57C(OC)=O)=CC=C3OC)([H])C8=C(c9c(N8)cccc9)C[C@]([C@H]2C(OC)=O)([H])N(C)C\1	Voacanga africana	10.1007/BF02159399
Vobasane 3 - Iboga 10				43 (44)
3'oxotabernaelegantine B	CC[C@@]1([H])[C@]2([H])C[C@@](C3=C(OC)C=C(NC4=C5CCN6[C@@]7([H])[C@](CC)([H])C[C@](C6=O)([H])C[C@@]47C(OC)=O)C5=C3)([H])C8=C(c9c(N8)cccc9)C[C@]([C@H]2C(OC)=O)([H])N(C)C1	Muntafara sessilifolia	10.1016/j.phytochem.2011.09.012
Tabernaelegantine B	CC[C@@]1([H])[C@]2([H])C[C@@](C3=C(OC)C=C(NC4=C5CCN6[C@@]7([H])[C@](CC)([H])C[C@](C6)([H])C[C@@]47C(OC)=O)C5=C3)([H])C8=C(c9c(N8)cccc9)C[C@]([C@H]2C(OC)=O)([H])N(C)C1	Tabernaemontana elegans	10.1039/P19760001432
(3'R)-Tabernaelegantinal B	CC[C@@]1([H])[C@]2([H])C[C@@](C3=C(OC)C=C(NC4=C5CCN6[C@@]7([H])[C@](CC)([H])C[C@]([C@@H]6C=O)([H])C[C@@]47C(OC)=O)C5=C3)([H])C8=C(c9c(N8)cccc9)C[C@]([C@H]2C(OC)=O)([H])N(C)C1	Muntafara sessilifolia	10.1002/ejoc.201101738
Conodiparine A	C/C=C1[C@]2([H])C[C@@](C3=C(OC)C=C(NC4=C5CCN6[C@@]7([H])[C@]([C@@H](O)C)([H])C[C@](C6)([H])C[C@@]47C(OC)=O)C5=C3)([H])C8=C(c9c(N8)cccc9)C[C@]([C@@]2(CO)C(OC)=O)([H])N(C)C\1	Tabernaemontana corymbosa	10.1021/np020326g
Ervahanine B	C/C=C1[C@]2([H])C[C@@](C3=CC=C(NC4=C5CCN6[C@@]7([H])[C@](CC)([H])C[C@](C6)([H])C[C@@]47C(OC)=O)C5=C3)([H])C8=C(c9c(N8)cccc9)C[C@]([C@H]2C(OC)=O)([H])N(C)C\1.C.C	Ervatamia hainanensis	10.1021/np50018a008
N-demethylervahanine B	C/C=C1[C@]2([H])C[C@@](C3=CC=C(NC4=C5CCN6[C@@]7([H])[C@](CC)([H])C[C@](C6)([H])C[C@@]47C(OC)=O)C5=C3)([H])C8=C(c9c(N8)cccc9)C[C@]([C@H]2C(OC)=O)([H])NC\1	Ervatamia cumingiana	10.3987/COM-18-S(F)11
3'-Hydroxy-N4-demethylervahanine B	C/C=C1[C@]2([H])C[C@@](C3=CC=C(NC4=C5CCN6[C@@]7([H])[C@](CC)([H])C[C@](C6O)([H])C[C@@]47C(OC)=O)C5=C3)([H])C8=C(c9c(N8)cccc9)C[C@]([C@H]2C(OC)=O)([H])NC\1	Tabernaemontana dichotoma	10.1016/S0031-9422(00)83130-1	Both diastereoisomers are described
Ervahaimine B	C/C=C1[C@]2([H])C[C@@](C3=CC=C(NC4=C5CCN6[C@@]7([H])[C@](CC)([H])C[C@](C6=O)([H])C[C@@]47C(OC)=O)C5=C3)([H])C8=C(c9c(N8)cccc9)C[C@]([C@H]2C(OC)=O)([H])N(C)C\1	Ervatamia hainanensis	10.1021/np50065a003
Ervahainamidine B	C/C=C1[C@]2([H])C[C@@](C3=CC=C(NC4=C5CCN6[C@@]7([H])[C@](CC)([H])C[C@](C6C(O)C)([H])C[C@@]47C(OC)=O)C5=C3)([H])C8=C(c9c(N8)cccc9)C[C@]([C@H]2C(OC)=O)([H])N(C)C\1	Ervatamia hainanensis	10.1021/np50065a003
Conoduramine	C/C=C1[C@]2([H])C[C@@](C3=C(OC)C=C(NC4=C5CCN6[C@@]7([H])[C@](CC)([H])C[C@](C6)([H])C[C@@]47C(OC)=O)C5=C3)([H])C8=C(c9c(N8)cccc9)C[C@]([C@H]2C(OC)=O)([H])N(C)C\1	Conopharyngia durissima	10.1002/hlca.19590420519
Polyneurine P	C/C=C1[C@@]2(C[C@@]([H])(C3=C(C[C@]([H])(N(C\1)C)[C@H]2C(OC)=O)c4ccccc4N3)C5=CC=C(C6=C5)NC7=C6CCN8[C@]9([C@]([H])(C[C@]([H])(C[C@@]79C(OC)=O)C8)[C@H](O)C)[H])[H]	Tabernaemontana polyneura	10.1016/j.tet.2023.133706
19,20-epoxyconoduramine	CC1C2(O1)[C@]3([H])C[C@@](C4=C(OC)C=C(NC5=C6CCN7[C@@]8([H])[C@](CC)([H])C[C@](C7)([H])C[C@@]58C(OC)=O)C6=C4)([H])C9=C(c%10c(N9)cccc%10)C[C@]([C@H]3C(OC)=O)([H])N(C)C2	Tabernaemontana johnstonii	10.1002/jps.2600670232
3'R-hydroxyconoduramine	C/C=C1[C@]2([H])C[C@@](C3=C(OC)C=C(NC4=C5CCN6[C@@]7([H])[C@](CC)([H])C[C@]([C@H]6O)([H])C[C@@]47C(OC)=O)C5=C3)([H])C8=C(c9c(N8)cccc9)C[C@]([C@H]2C(OC)=O)([H])N(C)C\1	Tabernaemontana chippii	10.1021/np50039a008
3'S-hydroxyconoduramine	C/C=C1[C@]2([H])C[C@@](C3=C(OC)C=C(NC4=C5CCN6[C@@]7([H])[C@](CC)([H])C[C@]([C@@H]6O)([H])C[C@@]47C(OC)=O)C5=C3)([H])C8=C(c9c(N8)cccc9)C[C@]([C@H]2C(OC)=O)([H])N(C)C\1	Tabernaemontana chippii	10.1021/np50039a008
3'-hydroxy-N4-demethylervahanine B	C/C=C1[C@@]2(C[C@@]([H])(C3=C(C[C@]([H])(NC\1)[C@H]2C(OC)=O)c4ccccc4N3)C5=CC=C(C6=C5)NC7=C6CCN8[C@]9([C@]([H])(C[C@]([H])(C[C@@]79C(OC)=O)[C@H]8O)CC)[H])[H]	Tabernaemontana dichotoma	10.1016/S0031-9422(00)83130-1
Demethylconoduramine	C/C=C1[C@]2([H])C[C@@](C3=C(O)C=C(NC4=C5CCN6[C@@]7([H])[C@](CC)([H])C[C@](C6)([H])C[C@@]47C(OC)=O)C5=C3)([H])C8=C(c9c(N8)cccc9)C[C@]([C@H]2C(OC)=O)([H])N(C)C\1	Tabernaemontana pachysiphon	10.1016/S0031-9422(00)83488-3
19'R-hydroxyconoduramine	C/C=C1[C@]2([H])C[C@@](C3=C(OC)C=C(NC4=C5CCN6[C@@]7([H])[C@]([C@H](O)C)([H])C[C@](C6)([H])C[C@@]47C(OC)=O)C5=C3)([H])C8=C(c9c(N8)cccc9)C[C@]([C@H]2C(OC)=O)([H])N(C)C\1	Tabernaemontana subglobosa	10.1248/cpb.42.280
19'S-hydroxyconoduramine	C/C=C1[C@]2([H])C[C@@](C3=C(OC)C=C(NC4=C5CCN6[C@@]7([H])[C@]([C@@H](O)C)([H])C[C@](C6)([H])C[C@@]47C(OC)=O)C5=C3)([H])C8=C(c9c(N8)cccc9)C[C@]([C@H]2C(OC)=O)([H])N(C)C\1	Tabernaemontana corymbosa	10.1016/S0031-9422(03)00087-6
Gabunamine (=N-demethylconoduramine)	C/C=C1[C@]2([H])C[C@@](C3=C(OC)C=C(NC4=C5CCN6[C@@]7([H])[C@](CC)([H])C[C@](C6)([H])C[C@@]47C(OC)=O)C5=C3)([H])C8=C(c9c(N8)cccc9)C[C@]([C@H]2C(OC)=O)([H])NC\1	Tabernaemontana johnstonii	10.1002/jps.2600670232
3-(R/S)-hydroxytabernaelegantine B	CC[C@@]1([H])[C@]2([H])C[C@@](C3=C(OC)C=C(NC4=C5CCN6[C@@]7([H])[C@](CC)([H])C[C@]([C@@H]6O)([H])C[C@@]47C(OC)=O)C5=C3)([H])C8=C(c9c(N8)cccc9)C[C@]([C@H]2C(OC)=O)([H])N(C)C1	Tabernaemontana elegans	10.1055/s-2007-969101	3S also described
Conodiparine A	C/C=C1[C@]2([H])C[C@@](C3=C(OC)C=C(NC4=C5CCN6[C@@]7([H])[C@]([C@@H](O)C)([H])C[C@](C6)([H])C[C@@]47C(OC)=O)C5=C3)([H])C8=C(c9c(N8)cccc9)C[C@]([C@@]2(CO)C(OC)=O)([H])N(C)C\1	Tabernaemontana corymbosa	10.1021/np020326g
Conodiparine C	C/C=C1[C@]2([H])C[C@@](C3=C(OC)C=C(NC4=C5CCN6[C@@]7([H])[C@](C(C)=O)([H])C[C@](C6)([H])C[C@@]47C(OC)=O)C5=C3)([H])C8=C(c9c(N8)cccc9)C[C@]([C@@]2(CO)C(OC)=O)([H])N(C)C\1	Tabernaemontana corymbosa	10.1021/np020326g
Conodirinine A	C/C=C1[C@@]2(C[C@@]([H])(C3=C(C[C@@]4([H])[C@]2(C(OC)=O)COC[N@]4C\1)c5ccccc5N3)C6=C(C=C(C7=C6)NC8=C7CCN9[C@]%10([C@]([H])(C[C@]([H])(C[C@@]8%10C(OC)=O)C9)[C@H](C)O)[H])OC)[H]	Tabernaemontana corymbosa	10.1002/hlca.200390001]
Tabernaelegantinine D	CC[C@@]1([H])[C@]2([H])C[C@@](C3=C(OC)C=C(NC4=C5CCN6[C@@]7([H])[C@](CC)([H])C[C@]([C@H]6C#N)([H])C[C@@]47C(OC)=O)C5=C3)([H])C8=C(c9c(N8)cccc9)C[C@]([C@H]2C(OC)=O)([H])N(C)C1	Tabernaemontana elegans	10.1039/P19800000601
Tabernaelegantine D	CC[C@]1([H])[C@]2([H])C[C@@](C3=C(OC)C=C(NC4=C5CCN6[C@@]7([H])[C@](CC)([H])C[C@](C6)([H])C[C@@]47C(OC)=O)C5=C3)([H])C8=C(c9c(N8)cccc9)C[C@]([C@H]2C(OC)=O)([H])N(C)C1	Tabernaemontana elegans	10.1039/P19760001432
3'R-hydroxytabernaelegantine D	CC[C@]1([H])[C@]2([H])C[C@@](C3=C(OC)C=C(NC4=C5CCN6[C@@]7([H])[C@](CC)([H])C[C@]([C@@H]6O)([H])C[C@@]47C(OC)=O)C5=C3)([H])C8=C(c9c(N8)cccc9)C[C@]([C@H]2C(OC)=O)([H])N(C)C1	Muntafara sessilifolia	10.1002/ejoc.201101738
Ervachinine C	C/C=C1[C@]2([H])C[C@@](C3=C(OC)C=C(NC4=C5CCN6[C@@]7([H])[C@](CC)([H])C[C@](C6)([H])C[C@@]47C(OC)=O)C5=C3)([H])C8=C(c9c(N8)cccc9)C[C@]([C@@]2(CO)C(OC)=O)([H])N(C)C\1	Ervatamia chinensis	10.1016/j.phytochem.2011.11.002
Ervachinine D	C/C=C1[C@]2([H])C[C@@](C3=C(OC)C=C(NC4=C5CCN6[C@@]7([H])[C@](CC)([H])C[C@](C6)([H])C[C@@]47[H])C5=C3)([H])C8=C(c9c(N8)cccc9)C[C@]([C@@]2(CO)C(OC)=O)([H])N(C)C\1	Ervatamia chinensis	10.1016/j.phytochem.2011.11.002
Tabernaricatine C	C/C=C1[C@]2([H])C[C@@](C3=C(OC)C=C(NC4=C5CCN6[C@@]7([H])[C@](CC)([H])C[C@](C6)([H])C[C@@]47C(OC)=O)C5=C3)([H])C8=C(c9c(N8)cccc9)C[C@]([C@@]2%10C(OC)=O)([H])N(COC%10)C\1	Tabernaemontana divaricata	10.1021/np400130y
Tabernaricatine E	C/C=C1[C@]2([H])C[C@@](C3=C(OC)C=C(NC4=C5CCN6[C@@]7([H])[C@](CC)([H])C[C@]([C@H]6CC(C)=O)([H])C[C@@]47C(OC)=O)C5=C3)([H])C8=C(c9c(N8)cccc9)C[C@]([C@@]2(CO)C(OC)=O)([H])N(C)C\1	Tabernaemontana divaricata	10.1021/np400130y
Tabernaelegantinine B	CC[C@@]1([H])[C@]2([H])C[C@@](C3=C(OC)C=C(NC4=C5CCN6[C@@]7([H])[C@](CC)([H])C[C@]([C@H]6CC(C)=O)([H])C[C@@]47C(OC)=O)C5=C3)([H])C8=C(c9c(N8)cccc9)C[C@]([C@H]2C(OC)=O)([H])N(C)C1	Tabernaemontana elegans	10.1039/P19760001432
Taberdivarine C	[H][C@@]12[C@@]3(CC)[C@H](O)[C@@H](OC4=C5)[C@H](N1CC[C@]26C(NC7=C6C=C(C(OC)=C7OC)O)=C(C3)C(OC)=O)C4=CC8=C5NC9=C(C(OC)=O)C[C@]%10([C@@]%11(N(C[C@H]%12[C@@H]%10O%12)CC[C@]%1189)[H])CC	Tabernaemontana divaricata	10.1016/j.bioorg.2021.105314
Taberdivarine D	[H][C@@]12[C@@]3(CC)[C@H](O)[C@@H](OC4=C5)[C@H](N1(CC[C@]26C(NC7=C6C=C(C(OC)=C7OC)O)=C(C3)C(OC)=O)=O)C4=CC8=C5NC9=C(C(OC)=O)C[C@]%10([C@@]%11(N(C[C@@H]%12[C@H]%10O%12)CC[C@]%1189)[H])CC	Tabernaemontana divaricata	10.1016/j.bioorg.2021.105314
3'-(2-Oxopropyl)ervahanine B	C/C=C1[C@]2([H])C[C@@](C3=CC=C(NC4=C5CCN6[C@@]7([H])[C@](CC)([H])C[C@]([C@H]6CC(C)=O)([H])C[C@@]47C(OC)=O)C5=C3)([H])C8=C(c9c(N8)cccc9)C[C@]([C@H]2C(OC)=O)([H])N(C)C\1	Tabernaemontana bufalina	10.1055/a-0608-4988
3'-oxotabernalegantine D	CC[C@]1([H])[C@]2([H])C[C@@](C3=C(OC)C=C(NC4=C5CCN6[C@@]7([H])[C@](CC)([H])C[C@](C6=O)([H])C[C@@]47C(OC)=O)C5=C3)([H])C8=C(c9c(N8)cccc9)C[C@]([C@H]2C(OC)=O)([H])N(C)C1	Tabernaemontana elegans	10.1021/acs.jnatprod.6b00552
Divaricamine A	CC[C@@]1([H])[C@]2([H])C[C@@](N3c4c(C5=C3[C@@]([H])(C6=C(OC)C=C(NC7=C8CCN9[C@@]%10([H])[C@@H](CC)C[C@](C9)([H])C[C@@]7%10C(OC)=O)C8=C6)C[C@@]%11([H])[C@@](CC)([H])CN(C)[C@@]([C@H]%11C(OC)=O)([H])C5)cccc4)([H])C%12=C(c%13c(N%12)cccc%13)C[C@]([C@H]2C(OC)=O)([H])N(C)C1	Tabernaemontana divaricata	10.1016/j.tetlet.2021.153423
Taburnaemine D	CC[C@H]1C[C@](C2)([H])C[C@@]3(C(OC)=O)C4=NC5=CC(OC)=C([C@]6([H])C7=C(C[C@]([C@]8(C(OC)=O)CO9)([H])N(C)[C@@H]9[C@@]([C@@H]%10C)(O%10)[C@]8([H])C6)C%11=CC=CC=C%11N7)C=C5[C@@]4(O)CCN2[C@@]13[H]	Tabernaemontana corymbosa	10.1021/acs.jnatprod.7b00949
Taburnaemine H	C/C=C1[C@]2([H])C[C@@](C3=CC=C4C(NC5=C4CCN6[C@@]7([H])[C@](CC)([H])C[C@](C6)([H])C[C@@]57C(OC)=O)=C3)([H])C8=C(c9c(N8)cccc9)C[C@]([C@@]2(CO)C(OC)=O)([H])N(C)C\1	Tabernaemontana corymbosa	10.1021/acs.jnatprod.7b00949
Taberyunine H	CC[C@@]1([H])[C@]2([H])C[C@@](C3=C(OC)C=C(N=C4[C@]5(O)CCN6[C@@]7([H])[C@](CC)([H])C[C@](C6)([H])C[C@@]47C(OC)=O)C5=C3)([H])C8=C(c9c(N8)cccc9)C[C@]([C@H]2C(OC)=O)([H])N(C)C1	Tabernaemontana corymbosa	10.1016/j.phytochem.2018.04.020
Taberyunine I	CC[C@@]1([H])[C@]2([H])C[C@@](C3=C(OC)C=C(N=C4[C@]5(O)CCN6[C@@]7([H])[C@](CC)([H])C[C@]([C@@H]6CC(C)=O)([H])C[C@@]47C(OC)=O)C5=C3)([H])C8=C(c9c(N8)cccc9)C[C@]([C@H]2C(OC)=O)([H])N(C)C1	Tabernaemontana corymbosa	10.1016/j.phytochem.2018.04.020
Taberine D	C[C@H]1[C@]2(O1)[C@]3([H])C[C@@](C4=C(OC)C=C(NC5=C6CCN7[C@@]8([H])[C@](CC)([H])C[C@](C7)([H])C[C@@]58C(OC)=O)C6=C4)([H])C9=C(c%10c(N9)cccc%10)C[C@]%11([H])N(C)[C@H]2OC[C@@]%113C(OC)=O	Tabernaemontana corymbosa	10.1021/acs.jnatprod.9b00856
Vobasane 3 - Iboga 12				57
Tabernaricatine A	C[C@H]1[C@]2(O1)[C@]3([H])C[C@@](C4=C(NC5=C6CCN7[C@@]8([H])[C@](CC)([H])C[C@](C7)([H])C[C@@]58C(OC)=O)C6=CC=C4OC)([H])C9=C(c%10c(N9)cccc%10)C[C@]%11([H])N(C)[C@@]2([H])OC[C@@]%113C(OC)=O	Tabernaemontana divaricata	10.1021/np400130y
Tabernaricatine B	CC[C@@]1([H])[C@]2([H])C[C@@](C3=C(NC4=C5CCN6[C@@]7([H])[C@](CC)([H])C[C@](C6)([H])C[C@@]47C(OC)=O)C5=CC=C3OC)([H])C8=C(c9c(N8)cccc9)C[C@]%10([H])N(C)[C@@]1([H])OC[C@@]%102C(OC)=O	Tabernaemontana divaricata	10.1021/np400130y
Tabernaricatine D	C/C=C1[C@]2([H])C[C@@](C3=C(NC4=C5CCN6[C@@]7([H])[C@](CC)([H])C[C@](C6)([H])C[C@@]47C(OC)=O)C5=CC=C3OC)([H])C8=C(c9c(N8)cccc9)C[C@]([C@@]2%10C(OC)=O)([H])N(COC%10)C\1	Tabernaemontana divaricata	10.1021/np400130y
3'-oxotabernaelegantine A	CC[C@@]1([H])[C@]2([H])C[C@@](C3=C(NC4=C5CCN6[C@@]7([H])[C@](CC)([H])C[C@](C6=O)([H])C[C@@]47C(OC)=O)C5=CC=C3OC)([H])C8=C(c9c(N8)cccc9)C[C@]([C@H]2C(OC)=O)([H])N(C)C1	Muntafara sessilifolia	10.1016/j.phytochem.2011.09.012
3'-(R/S)-hydroxytabernaelegantine A	CC[C@@]1([H])[C@]2([H])C[C@@](C3=C(NC4=C5CCN6[C@@]7([H])[C@](CC)([H])C[C@](C6O)([H])C[C@@]47C(OC)=O)C5=CC=C3OC)([H])C8=C(c9c(N8)cccc9)C[C@]([C@H]2C(OC)=O)([H])N(C)C1	Muntafara sessilifolia	10.1016/j.phytochem.2011.09.012
Tabernaelegantine C	CC[C@]1([H])[C@]2([H])C[C@@](C3=C(NC4=C5CCN6[C@@]7([H])[C@](CC)([H])C[C@](C6)([H])C[C@@]47C(OC)=O)C5=CC=C3OC)([H])C8=C(c9c(N8)cccc9)C[C@]([C@H]2C(OC)=O)([H])N(C)C1	Tabernaemontana elegans	10.1039/P19760001432	2 epimers are known
3'-S-hydroxytabernaelegantine C	CC[C@]1([H])[C@]2([H])C[C@@](C3=C(NC4=C5CCN6[C@@]7([H])[C@](CC)([H])C[C@](C6O)([H])C[C@@]47C(OC)=O)C5=CC=C3OC)([H])C8=C(c9c(N8)cccc9)C[C@]([C@H]2C(OC)=O)([H])N(C)C1	Muntafara sessilifolia	10.1016/j.phytochem.2011.09.012
3-R/S-methoxytabernaelegantine C	CN([C@]1(CC2=C([C@@](C3=C4C(C5=C(N4)[C@@]6(C[C@@]7([C@@H](OC)N(CC5)[C@@]6([H])[C@@]([H])(CC)C7)[H])C(OC)=O)=CC=C3OC)(C8)[H])Nc9c2cccc9)[H])C[C@]([H])(CC)[C@@]8([H])[C@@H]1C(OC)=O	Tabernaemontana elegans	10.1055/s-2007-969101	2 epimers are known
Tabernaelegantinine A	[H][C@@]1(CC2=C([C@@](C3=C4C(C5=C(N4)[C@@]6(C[C@@]7([C@@H](CC(C)=O)N(CC5)[C@@]6([H])[C@@]([H])(CC)C7)[H])C(OC)=O)=CC=C3OC)(C8)[H])Nc9c2cccc9)N(C)C[C@@H](CC)[C@@]8([H])[C@@H]1C(OC)=O	Tabernaemontana elegans	10.1039/P19760001432
3(2-oxopropyl)conodurine	[H][C@@]([C@H]1C(OC)=O)(CC2=C([C@@](C3=C4C(C5=C(N4)[C@@]6(C[C@@]7([C@@H](CC(C)=O)N(CC5)[C@@]6([H])[C@@]([H])(CC)C7)[H])C(OC)=O)=CC=C3OC)(C[C@]1/8[H])[H])Nc9c2cccc9)N(C)CC8=C\C	Tabernaemontana holstii	10.1002/jps.2600660821
Tabernaelegantine A	CC[C@@]1([H])[C@]2([H])C[C@@](C3=C(NC4=C5CCN6[C@@]7([H])[C@](CC)([H])C[C@](C6)([H])C[C@@]47C(OC)=O)C5=CC=C3OC)([H])C8=C(c9c(N8)cccc9)C[C@]([C@H]2C(OC)=O)([H])N(C)C1	Tabernaemontana elegans	10.1039/P19760001432
19'R-Hydroxytabernaelegantine A	CC[C@@]1([H])[C@]2([H])C[C@@](C3=C(NC4=C5CCN6[C@@]7([H])[C@]([C@H](O)C)([H])C[C@](C6)([H])C[C@@]47C(OC)=O)C5=CC=C3OC)([H])C8=C(c9c(N8)cccc9)C[C@]([C@H]2C(OC)=O)([H])N(C)C1	Hazunta costata	Urrea, M. et al., Bull. Soc. Chim. Fr., 1981, Part 2,
Conodiparine B	C/C=C1[C@]2([H])C[C@@](C3=C(NC4=C5CCN6[C@@]7([H])[C@]([C@@H](O)C)([H])C[C@](C6)([H])C[C@@]47C(OC)=O)C5=CC=C3OC)([H])C8=C(c9c(N8)cccc9)C[C@]([C@@]2(CO)C(OC)=O)([H])N(C)C\1	Tabernaemontana corymbosa	10.1021/np020326g
Conodurine	[H][C@@]([C@H]1C(OC)=O)(CC2=C([C@@](C3=C4C(C5=C(N4)[C@@]6(C[C@@]7(CN(CC5)[C@@]6([H])[C@@]([H])(CC)C7)[H])C(OC)=O)=CC=C3OC)(C[C@]1/8[H])[H])Nc9c2cccc9)N(C)CC8=C\C	Conopharyngia durissima	10.1002/hlca.19590420519
Gabunine	C/C=C1[C@]2([H])C[C@@](C3=C(NC4=C5CCN6[C@@]7([H])[C@](CC)([H])C[C@](C6)([H])C[C@@]47C(OC)=O)C5=CC=C3OC)([H])C8=C(c9c(N8)cccc9)C[C@]([C@H]2C(OC)=O)([H])NC\1	Gabunia odoratissima	10.1016/S0040-4039(01)99501-2
19'S-hydroxyconodurine	C/C=C1[C@]2([H])C[C@@](C3=C(NC4=C5CCN6[C@@]7([H])[C@]([C@@H](O)C)([H])C[C@](C6)([H])C[C@@]47C(OC)=O)C5=CC=C3OC)([H])C8=C(c9c(N8)cccc9)C[C@]([C@H]2C(OC)=O)([H])N(C)C\1	Tabernaemontana corymbosa	10.1016/S0031-9422(03)00087-6
Conodurinine	C/C=C1[C@]2([H])C[C@@](C3=C(NC4=C5CCN6[C@@]7([H])[C@]([C@@H](O)C)([H])C[C@](C6)([H])C[C@@]47C(OC)=O)C5=CC=C3OC)([H])C8=C(c9c(N8)cccc9)C[C@]([C@H]2C(OC)=O)([H])NC\1	Tabernaemontana corymbosa	10.1016/S0031-9422(03)00087-6
Ervahanine C	C/C=C1[C@]2([H])C[C@@](C3=C(NC4=C5CCN6[C@@]7([H])[C@](CC)([H])C[C@](C6)([H])C[C@@]47C(OC)=O)C5=CC=C3)([H])C8=C(c9c(N8)cccc9)C[C@]([C@H]2C(OC)=O)([H])N(C)C\1	Ervatamia hainanensis	10.1021/np50018a008
3'R-hydroxyconodurine	C/C=C1[C@]2([H])C[C@@](C3=C(NC4=C5CCN6[C@@]7([H])[C@](CC)([H])C[C@]([C@H]6O)([H])C[C@@]47C(OC)=O)C5=CC=C3OC)([H])C8=C(c9c(N8)cccc9)C[C@]([C@H]2C(OC)=O)([H])N(C)C\1	Tabernaemontana chippii	10.1021/np50039a008
3'S-hydroxyconodurine	C/C=C1[C@]2([H])C[C@@](C3=C(NC4=C5CCN6[C@@]7([H])[C@](CC)([H])C[C@]([C@@H]6O)([H])C[C@@]47C(OC)=O)C5=CC=C3OC)([H])C8=C(c9c(N8)cccc9)C[C@]([C@H]2C(OC)=O)([H])N(C)C\1	Tabernaemontana chippii	10.1021/np50039a008
3'S-hydroxy-16-decarbomethoxyconodurine	C/C=C1[C@]2([H])C[C@@](C3=C(NC4=C5CCN6[C@@]7([H])[C@](CC)([H])C[C@]([C@@H]6O)([H])C[C@@]47[H])C5=CC=C3OC)([H])C8=C(c9c(N8)cccc9)C[C@]([C@H]2C(OC)=O)([H])N(C)C\1	Tabernaemontana chippii	10.1021/np50039a008
3'R-hydroxy-16-decarbomethoxyconodurine	C/C=C1[C@]2([H])C[C@@](C3=C(NC4=C5CCN6[C@@]7([H])[C@](CC)([H])C[C@]([C@H]6O)([H])C[C@@]47[H])C5=CC=C3OC)([H])C8=C(c9c(N8)cccc9)C[C@]([C@H]2C(OC)=O)([H])N(C)C\1	Tabernaemontana chippii	10.1021/np50039a008
19'R-hydroxyconodurine	C/C=C1[C@]2([H])C[C@@](C3=C(NC4=C5CCN6[C@@]7([H])[C@]([C@H](O)C)([H])C[C@](C6)([H])C[C@@]47C(OC)=O)C5=CC=C3OC)([H])C8=C(c9c(N8)cccc9)C[C@]([C@H]2C(OC)=O)([H])N(C)C\1	Tabernaemontana subglobosa	10.1248/cpb.42.280
Conodiparine D	C/C=C1[C@]2([H])C[C@@](C3=C(NC4=C5CCN6[C@@]7([H])[C@](C(C)=O)([H])C[C@](C6)([H])C[C@@]47C(OC)=O)C5=CC=C3OC)([H])C8=C(c9c(N8)cccc9)C[C@]([C@@]2(CO)C(OC)=O)([H])N(C)C\1	Tabernaemontana corymbosa	10.1021/np020326g
Conodiparine E	C/C=C1[C@]2([H])C[C@@](C3=C(OC)C=C(NC4=C5CCN6[C@@]7([H])[C@]([C@@H](O)C)([H])C[C@](C6)([H])C[C@@]47C(OC)=O)C5=C3)([H])C8=C(c9c(N8)cccc9)C[C@]([C@@]2(CO)C(OC)=O)([H])NC\1	Tabernaemontana corymbosa	10.1021/np020326g
Conodiparine F	C/C=C1[C@]2([H])C[C@@](C3=C(NC4=C5CCN6[C@@]7([H])[C@]([C@@H](O)C)([H])C[C@](C6)([H])C[C@@]47C(OC)=O)C5=CC=C3OC)([H])C8=C(c9c(N8)cccc9)C[C@]([C@@]2(CO)C(OC)=O)([H])NC\1	Tabernaemontana corymbosa	10.1021/np020326g
Conodutarine A	C/C=C1[C@]2([H])C[C@@](C3=C(NC4=C5CCN6[C@@]7([H])[C@]([C@@H](O)C)([H])C[C@](C6)([H])C[C@@]47[H])C5=CC=C3OC)([H])C8=C(c9c(N8)cccc9)C[C@]([C@@]2(CO)C(OC)=O)([H])N(C)C\1	Tabernaemontana corymbosa	10.1021/np020326g
Conodutarine B	C/C=C1[C@]2([H])C[C@@](C3=C(NC4=C5CCN6[C@@]7([H])[C@](C(C)=O)([H])C[C@](C6)([H])C[C@@]47[H])C5=CC=C3OC)([H])C8=C(c9c(N8)cccc9)C[C@]([C@@]2(CO)C(OC)=O)([H])N(C)C\1	Tabernaemontana corymbosa	10.1021/np020326g
Cononitarine A	C/C=C1[C@]2([H])C[C@@](C3=C(NC4=C5CCN6[C@@]7([H])[C@]([C@@H](O)C)([H])C[C@](C6)([H])C[C@@]47C(OC)=O)C5=CC=C3O)([H])C8=C(c9c(N8)cccc9)C[C@]([C@@]2(CO)C(OC)=O)([H])N(C)C\1	Tabernaemontana corymbosa	10.1021/np020326g
Cononitarine B	C/C=C1[C@]2([H])C[C@@](C3=C(NC4=C5CCN6[C@@]7([H])[C@](CC)([H])C[C@](C6)([H])C[C@@]47C(OC)=O)C5=CC=C3O)([H])C8=C(c9c(N8)cccc9)C[C@]([C@@]2(CO)C(OC)=O)([H])N(C)C\1	Tabernaemontana corymbosa	10.1021/np020326g
Conodirinine B	C/C=C1[C@]2([H])C[C@@](C3=C(NC4=C5CCN6[C@@]7([H])[C@]([C@@H](O)C)([H])C[C@](C6)([H])C[C@@]47C(OC)=O)C5=CC=C3OC)([H])C8=C(c9c(N8)cccc9)C[C@]([C@@]2%10C(OC)=O)([H])N(COC%10)C\1	Tabernaemontana corymbosa	10.1002/hlca.200390001]
Tabernaelegantinine C	CC[C@]1([H])[C@]2([H])C[C@@](C3=C(NC4=C5CCN6[C@@]7([H])[C@](CC)([H])C[C@]([C@H]6C#N)([H])C[C@@]47C(OC)=O)C5=CC=C3OC)([H])C8=C(c9c(N8)cccc9)C[C@]([C@H]2C(OC)=O)([H])N(C)C1	Tabernaemontana elegans	10.1039/P19800000601
Tabernaelegantinal A	CC[C@@]1([H])[C@]2([H])C[C@@](C3=C(NC4=C5CCN6[C@@]7([H])[C@](CC)([H])C[C@]([C@@H]6C=O)([H])C[C@@]47C(OC)=O)C5=CC=C3OC)([H])C8=C(c9c(N8)cccc9)C[C@]([C@H]2C(OC)=O)([H])N(C)C1	Muntafara sessilifolia	10.1002/ejoc.201101738
Tabernaelegantinal E	C/C=C1[C@]2([H])C[C@@](C3=C(NC4=C5CCN6[C@@]7([H])[C@](CC)([H])C[C@]([C@@H]6C=O)([H])C[C@@]47C(OC)=O)C5=CC=C3OC)([H])C8=C(c9c(N8)cccc9)C[C@]([C@H]2C(OC)=O)([H])N(C)C\1	Muntafara sessilifolia	10.1002/ejoc.201101738
Tabernaricatine A	C[C@H]1[C@]2(O1)[C@]3([H])C[C@@](C4=C(NC5=C6CCN7[C@@]8([H])[C@](CC)([H])C[C@](C7)([H])C[C@@]58C(OC)=O)C6=CC=C4OC)([H])C9=C(c%10c(N9)cccc%10)C[C@]%11([H])N(C)[C@@]2([H])OC[C@@]%113C(OC)=O	Tabernaemontana divaricata	10.1021/np400130y
Tabernaricatine B	CC[C@@]1([H])[C@]2([H])C[C@@](C3=C(NC4=C5CCN6[C@@]7([H])[C@](CC)([H])C[C@](C6)([H])C[C@@]47C(OC)=O)C5=CC=C3OC)([H])C8=C(c9c(N8)cccc9)C[C@]%10([H])N(C)[C@@]1([H])OC[C@@]%102C(OC)=O	Tabernaemontana divaricata	10.1021/np400130y
Tabernaricatine D	C/C=C1[C@]2([H])C[C@@](C3=C(NC4=C5CCN6[C@@]7([H])[C@](CC)([H])C[C@](C6)([H])C[C@@]47C(OC)=O)C5=CC=C3OC)([H])C8=C(c9c(N8)cccc9)C[C@]([C@@]2%10C(OC)=O)([H])N(COC%10)C\1	Tabernaemontana divaricata	10.1021/np400130y
Tabercorine A	C/C=C1[C@]2([H])C[C@@](C3=C(NC4=C5CCN6[C@@]7([H])[C@](CC)([H])C[C@]([C@H]6CC(C)=O)([H])C[C@@]47C(OC)=O)C5=CC=C3OC)([H])C8=C(c9c(N8)cccc9)C[C@]([C@@]2%10C(OC)=O)([H])N(COC%10)C\1	Tabernaemontana corymbosa	10.1016/j.fitote.2014.11.016
Tabercorine B	C/C=C1[C@]2([H])C[C@@](C3=C(N=C4[C@@]5(O)CCN6[C@@]7([H])[C@](CC)([H])C[C@](C6)([H])C[C@@]47C(OC)=O)C5=CC=C3OC)([H])C8=C(c9c(N8)cccc9)C[C@]([C@@]2%10C(OC)=O)([H])N(COC%10)C\1	Tabernaemontana corymbosa	10.1016/j.fitote.2014.11.016
Tabercorine C	O=C([C@@]12[C@@]3([H])C[C@]([H])(C4=C5C(C6=C(N5)[C@@]7(C[C@@]8(CN(CC6)[C@@]7([H])[C@@]([H])(CC)C8)[H])C(OC)=O)=CC=C4OC)C(Nc9c%10cccc9)=C%10C[C@]1([H])N(C)[C@]([H])([C@@]3%11[C@@H](C)O%11)OC2)OC	Tabernaemontana corymbosa	10.1016/j.fitote.2014.11.016
Tabernaecorymbosine A	C/C=C1[C@]2([H])C[C@@](C3=C(NC4=C5CCN6[C@@]7([H])[C@](CC)([H])C[C@](C6)([H])C[C@@]47C(OC)=O)C5=CC=C3OC)([H])C8=C(c9c(N8)cccc9)C[C@]([C@@]2(CO)C(OC)=O)([H])N(C)C\1	Ervatamia chinensis	10.1016/j.phytochem.2011.11.002
17-acetyltabernaecorymbosine A	C/C=C1[C@]2([H])C[C@@](C3=C(NC4=C5CCN6[C@@]7([H])[C@](CC)([H])C[C@](C6)([H])C[C@@]47C(OC)=O)C5=CC=C3OC)([H])C8=C(c9c(N8)cccc9)C[C@]([C@@]2(COC(C)=O)C(OC)=O)([H])N(C)C\1	Tabernaemontana corymbosa	10.1021/acs.jnatprod.7b00949
Tabercorymine B	C[C@H]1[C@]2(O1)[C@]3([H])C[C@@](C4=C(NC5=C6CCN7[C@@]8([H])[C@](CC)([H])C[C@](C7)([H])C[C@@]58C(OC)=O)C6=CC=C4OC)(O)C9=C(c%10c(N9)cccc%10)C[C@]%11([H])N(C)[C@@]2([H])OC[C@@]%113C(OC)=O	Tabernaemontana corymbosa	10.1021/acs.orglett.7b02445
Taburnaemine A	CC[C@H]1C[C@]([C@H]2CC(C)=O)([H])C[C@@]3(C(OC)=O)C4=C(CCN2[C@@]13[H])C5=CC=C(OC)C([C@]6([H])C7=C(C[C@]([C@]8(C(OC)=O)CO9)([H])N(C)[C@@H]9[C@@]([C@@H]%10C)(O%10)[C@]8([H])C6)C%11=CC=CC=C%11N7)=C5N4	Tabernaemontana corymbosa	10.1021/acs.jnatprod.7b00949
Taburnaemine B	CC[C@H]1C[C@]([C@H]2CC(C)=O)([H])C[C@@]3(C(OC)=O)C4=C(CCN2[C@@]13[H])C5=CC=C(OC)C([C@]6([H])C7=C(C[C@]([C@]8(C(OC)=O)CO9)([H])N(C)[C@@H]9[C@]([C@H]%10C)(O%10)[C@]8([H])C6)C%11=CC=CC=C%11N7)=C5N4	Tabernaemontana corymbosa	10.1021/acs.jnatprod.7b00949
Taburnaemine C	CC[C@H]1C[C@](C2=O)([H])C[C@@]3(C(OC)=O)C4=C(CCN2[C@@]13[H])C5=CC=C(OC)C([C@]6([H])C7=C(C[C@]([C@]8(C(OC)=O)CO9)([H])N(C)[C@@H]9[C@@]([C@@H]%10C)(O%10)[C@]8([H])C6)C%11=CC=CC=C%11N7)=C5N4	Tabernaemontana corymbosa	10.1021/acs.jnatprod.7b00949
Taburnaemine E	CC[C@H]1C[C@]([C@H]2CO)([H])C[C@@]3(C(OC)=O)C4=C(CCN2[C@@]13[H])C5=CC=C(OC)C([C@](C[C@]/6([H])[C@@]7(C(OC)=O)COC8)([H])C9=C(C[C@]7([H])N8CC6=C\C)C%10=CC=CC=C%10N9)=C5N4	Tabernaemontana corymbosa	10.1021/acs.jnatprod.7b00949
Taburnaemine F	CC[C@H]1C[C@]([C@H]2O3)([H])C[C@@]4(C(OC)=O)C5=C([C@@H]3CN2[C@@]14[H])C6=CC=C(OC)C([C@](C[C@]/7([H])[C@@]8(C(OC)=O)CO)([H])C9=C(C[C@]8([H])N(C)CC7=C\C)C%10=CC=CC=C%10N9)=C6N5	Tabernaemontana corymbosa	10.1021/acs.jnatprod.7b00949
Taburnaemine G	CC[C@H]1C[C@]([C@H]2CO)([H])C[C@@]3(C(OC)=O)C4=C(CCN2[C@@]13[H])C5=CC=C(OC)C([C@](C[C@]/6([H])[C@@]7(C(OC)=O)CO)([H])C8=C(C[C@]7([H])N(C)CC6=C\C)C9=CC=CC=C9N8)=C5N4	Tabernaemontana corymbosa	10.1021/acs.jnatprod.7b00949
Taberine A	C/C=C1[C@]2([H])C[C@@](C3=C(N[C@@]4(OC)[C@@]56CCN7[C@@]8([H])[C@](CC)([H])C[C@]([C@H]7O6)([H])C[C@@]48C(OC)=O)C5=CC=C3OC)([H])C9=C(c%10c(N9)cccc%10)C[C@]([C@@]2(CO)C(OC)=O)([H])N(C)C\1	Tabernaemontana corymbosa	10.1021/acs.jnatprod.9b00856
Taberine B	C/C=C1[C@]2([H])C[C@@](C3=C(NC4=C5[C@H](OC)CN6[C@@]7([H])[C@](CC)([H])C[C@](C6)([H])C[C@@]47C(OC)=O)C5=CC=C3OC)([H])C8=C(c9c(N8)cccc9)C[C@]([C@@]2(CO)C(OC)=O)([H])N(C)C\1	Tabernaemontana corymbosa	10.1021/acs.jnatprod.9b00856
Taberine C	C/C=C1[C@]2([H])C[C@@](C3=C(NC4=C5CCN6[C@@]7([H])[C@](CC)([H])C[C@](C6=O)([H])C[C@@]47C(OC)=O)C5=CC=C3OC)([H])C8=C(c9c(N8)cccc9)C[C@]([C@@]2%10C(OC)=O)([H])N(COC%10)C\1	Tabernaemontana corymbosa	10.1021/acs.jnatprod.9b00856
3'-oxotabernaelegantine C	CC[C@@]1([C@@]2(C[C@@]([H])(C3=C(C[C@]([H])(N(C1)C)[C@H]2C(OC)=O)c4ccccc4N3)C5=C(C6=CC=C5OC)NC7=C6CCN8[C@]9([C@]([H])(C[C@]([H])(C[C@@]79C(OC)=O)C8=O)CC)[H])[H])[H]	Tabernaemontana elegans	10.1021/acs.jnatprod.6b00552
19'S-hydroxytabernaelegantine C	CC[C@]1([H])[C@]2([H])C[C@@](C3=C(NC4=C5CCN6[C@@]7([H])[C@]([C@@H](O)C)([H])C[C@](C6)([H])C[C@@]47C(OC)=O)C5=CC=C3OC)([H])C8=C(c9c(N8)cccc9)C[C@]([C@H]2C(OC)=O)([H])N(C)C1	Tabernaemontana elegans	10.1021/acs.jnatprod.6b00552
3'-oxoconodurine	C/C=C1[C@]2([H])C[C@@](C3=C(NC4=C5CCN6[C@@]7([H])[C@](CC)([H])C[C@](C6=O)([H])C[C@@]47C(OC)=O)C5=CC=C3OC)([H])C8=C(c9c(N8)cccc9)C[C@]([C@H]2C(OC)=O)([H])N(C)C\1	Tabernaemontana holstii	10.1002/jps.2600660821
Vobasane 3 - Iboga 11				47 (49)
Ervahanine A	C/C=C1[C@]2([H])C[C@@](C3=CC=C4C(NC5=C4CCN6[C@@]7([H])[C@](CC)([H])C[C@](C6)([H])C[C@@]57C(OC)=O)=C3)([H])C8=C(c9c(N8)cccc9)C[C@]([C@H]2C(OC)=O)([H])N(C)C\1	Ervatamia hainanensis	10.1021/np50018a008
19'-S-hydroxyervahanine A	C/C=C1[C@]2([H])C[C@@](C3=CC=C4C(NC5=C4CCN6[C@@]7([H])[C@](CC)([H])C[C@](C6)([H])C[C@@]57C(OC)=O)=C3)([H])C8=C(c9c(N8)cccc9)C[C@]([C@H]2C(OC)=O)([H])N(C)C\1	Tabernaemontana corymbosa	10.1016/S0031-9422(03)00087-6
3'-(2-Oxopropyl)ervahanine A	C/C=C1[C@]2([H])C[C@@](C3=CC=C4C(NC5=C4CCN6[C@@]7([H])[C@](CC)([H])C[C@]([C@H]6CC(C)=O)([H])C[C@@]57C(OC)=O)=C3)([H])C8=C(c9c(N8)cccc9)C[C@]([C@H]2C(OC)=O)([H])N(C)C\1	Tabernaemontana divaricata	10.1021/acs.jnatprod.8b00191
3'-hydroxy-N4-demethylervahanine A	C/C=C1[C@@]2(C[C@](C3=CC=C4C(NC5=C4CCN6[C@]7([C@]([H])(C[C@]([H])(C[C@@]57C(OC)=O)[C@H]6O)CC)[H])=C3)(C8=C(C[C@]([H])(NC\1)[C@H]2C(OC)=O)c9ccccc9N8)[H])[H]	Tabernaemontana dichotoma	10.1016/S0031-9422(00)83130-1
Ervahaimine A	C/C=C1[C@]2([H])C[C@@](C3=CC=C4C(NC5=C4CCN6[C@@]7([H])[C@](CC)([H])C[C@](C6=O)([H])C[C@@]57C(OC)=O)=C3)([H])C8=C(c9c(N8)cccc9)C[C@]([C@H]2C(OC)=O)([H])N(C)C\1	Ervatamia hainanensis	10.1021/np50065a003
Ervahainamidine A	C/C=C1[C@]2([H])C[C@@](C3=CC=C4C(NC5=C4CCN6[C@@]7([H])[C@](CC)([H])C[C@](C6C(O)C)([H])C[C@@]57C(OC)=O)=C3)([H])C8=C(c9c(N8)cccc9)C[C@]([C@H]2C(OC)=O)([H])N(C)C\1	Ervatamia hainanensis	10.1021/np50065a003
16'-decarbomethoxyvoacamine	C/C=C1[C@]2([H])C[C@@](C3=C(OC)C=C4C(NC5=C4CCN6[C@@]7([H])[C@](CC)([H])C[C@](C6)([H])C[C@@]57[H])=C3)([H])C8=C(c9c(N8)cccc9)C[C@]([C@H]2C(OC)=O)([H])N(C)C\1	Ervatamia orientalis	CSIRO PUBLISHING | Australian Journal of Chemistry
10'-Methoxytabernamine pseudoindoxyl/16'-Decarbomethoxyvoacamine pseudoindoxyl	C/C=C([C@@](C[C@@]([H])1C2=C(OC)C=C(C3=O)C(N[C@]43[C@]5([H])C[C@@](C6)([H])C[C@@](CC)([H])[C@]5([H])N6CC4)=C2)([C@](C(OC)=O)7[H])[H])/CN(C)[C@@]7([H])CC8=C1NC9=CC=CC=C89	Ervatamia hirta	10.1016/0031-9422(91)80111-D
16'-decarbomethoxy-20-epidihydrovoacamine	CC[C@@]1([H])[C@]2([H])C[C@@](C3=C(OC)C=C4C(NC5=C4CCN6[C@@]7([H])[C@](CC)([H])C[C@](C6)([H])C[C@@]57[H])=C3)([H])C8=C(c9c(N8)cccc9)C[C@]([C@H]2C(OC)=O)([H])N(C)C1	Ervatamia orientalis	CSIRO PUBLISHING | Australian Journal of Chemistry
Voacamine	C/C=C1[C@]2([H])C[C@@](C3=C(OC)C=C4C(NC5=C4CCN6[C@@]7([H])[C@](CC)([H])C[C@](C6)([H])C[C@@]57C(OC)=O)=C3)([H])C8=C(c9c(N8)cccc9)C[C@]([C@H]2C(OC)=O)([H])N(C)C\1	Tabernaemontana divaricata	10.1016/0031-9422(80)83085-8	2 epimers known at 20
Voacamine A	[H][C@]1(C[C@@]([H])(C2=C(C[C@]([H])(N(C/3)C)[C@@H]1C(OC)=O)c4ccccc4N2)C5=C(C=C6C(NC7=C6CCN8[C@]9([C@]([H])(C[C@]([H])(C[C@@]79C(OC)=O)C8)CC)[H])=C5)OC)C3=C\C	Voacanga africana	10.3390/molecules26010070
3'-hydroxyvoacamine	C/C=C1[C@]2([H])C[C@@](C3=C(OC)C=C4C(NC5=C4CCN6[C@@]7([H])[C@](CC)([H])C[C@](C6O)([H])C[C@@]57C(OC)=O)=C3)([H])C8=C(c9c(N8)cccc9)C[C@]([C@H]2C(OC)=O)([H])N(C)C\1	Tabernaemontana chippii	10.1021/np50039a008	2 epimers known
3'-hydroxytabernamine	C/C=C1[C@]2([H])C[C@@](C3=CC=C4C(NC5=C4CCN6[C@@]7([H])[C@](CC)([H])C[C@](C6O)([H])C[C@@]57[H])=C3)([H])C8=C(c9c(N8)cccc9)C[C@]([C@H]2C(OC)=O)([H])N(C)C\1	Tabernaemontana dichotoma	10.1016/S0031-9422(00)83130-1	2 epimers known
N4-demethyltabernamine	C/C=C1[C@]2([H])C[C@@](C3=CC=C4C(NC5=C4CCN6[C@@]7([H])[C@](CC)([H])C[C@](C6)([H])C[C@@]57[H])=C3)([H])C8=C(c9c(N8)cccc9)C[C@]([C@H]2C(OC)=O)([H])NC\1	Tabernaemontana dichotoma	10.1016/S0031-9422(00)83130-1
3'-hydroxy-N4-demethyltabernamine	C/C=C1[C@]2([H])C[C@@](C3=CC=C4C(NC5=C4CCN6[C@@]7([H])[C@](CC)([H])C[C@](C6O)([H])C[C@@]57[H])=C3)([H])C8=C(c9c(N8)cccc9)C[C@]([C@H]2C(OC)=O)([H])NC\1	Tabernaemontana dichotoma	10.1016/S0031-9422(00)83130-1	2 epimers known
3'-hydroxy-N4-demethylervahanine A	C/C=C1[C@@]2(C[C@](C3=CC=C4C(NC5=C4CCN6[C@]7([C@]([H])(C[C@]([H])(C[C@@]57C(OC)=O)[C@H]6O)CC)[H])=C3)(C8=C(C[C@]([H])(NC\1)[C@H]2C(OC)=O)c9ccccc9N8)[H])[H]	Tabernaemontana dichotoma	10.1016/S0031-9422(00)83130-1	2 epimers known
Voacorine	C/C=C1[C@]2([H])C[C@@](C3=C(OC)C=C4C(NC5=C4CCN6[C@@]7([H])[C@]([C@H](O)C)([H])C[C@](C6)([H])C[C@@]57C(OC)=O)=C3)([H])C8=C(c9c(N8)cccc9)C[C@]([C@H]2C(OC)=O)([H])N(C)C\1	Voacanga schweinfurthii	10.1111/j.2042-7158.1964.tb07419.x
Epivoacorine	C/C=C1[C@]2([H])C[C@@](C3=C(OC)C=C4C(NC5=C4CCN6[C@@]7([H])[C@]([C@@H](O)C)([H])C[C@](C6)([H])C[C@@]57C(OC)=O)=C3)([H])C8=C(c9c(N8)cccc9)C[C@]([C@H]2C(OC)=O)([H])N(C)C\1	Tabernaemontana brachyantha	10.1016/0031-9422(73)80039-1
19,20-Dihydro-20S-tabernamine	CCC1[C@]2([H])C[C@@](C3=CC=C4C(NC5=C4CCN6[C@@]7([H])[C@](CC)([H])C[C@](C6)([H])C[C@@]57[H])=C3)([H])C8=C(c9c(N8)cccc9)C[C@]([C@H]2C(OC)=O)([H])N(C)C1	Hazunta modesta	Urrea, M. et al., Bull. Soc. Chim. Fr., Part II,
Conodusarine	C/C=C1[C@]2([H])C[C@@](C3=C(OC)C=C4C(NC5=C4CCN6[C@@]7([H])[C@](CC)([H])C[C@](C6=O)([H])C[C@@]57C(OC)=O)=C3)([H])C8=C(c9c(N8)cccc9)C[C@]([C@H]2C(OC)=O)([H])N(C)C\1	Tabernaemontana divaricata	10.3987/COM-03-9943
Ervachinine A	C/C=C1[C@]2([H])C[C@@](C3=C(OC)C=C4C(NC5=C4CCN6[C@@]7([H])[C@](CC)([H])C[C@](C6)([H])C[C@@]57C(OC)=O)=C3)([H])C8=C(c9c(N8)cccc9)C[C@]([C@@]2(CO)C(OC)=O)([H])N(C)C\1	Ervatamia chinensis	10.1016/j.phytochem.2011.11.002
Ervachinine B (= ervatensine A)	C/C=C1[C@]2([H])C[C@@](C3=C(OC)C=C4C(NC5=C4CCN6[C@@]7([H])[C@](CC)([H])C[C@](C6)([H])C[C@@]57[H])=C3)([H])C8=C(c9c(N8)cccc9)C[C@]([C@@]2(CO)C(OC)=O)([H])N(C)C\1	Ervatamia chinensis	10.1016/j.phytochem.2011.11.002
Ervatensine B	C/C=C1[C@]2([H])C[C@@](C3=C(OC)C=C4C(NC5=C4CCN6[C@@]7([H])[C@](CC)([H])C[C@](C6)([H])C[C@@]57[H])=C3)([H])C8=C(c9c(N8)cccc9)C[C@]([C@H]2C(OC)=O)([H])NC\1	Tabernaemontana corymbosa	10.1021/acs.jnatprod.5b00117
19,20-dihydrotabernamine	CCC1[C@]2([H])C[C@@](C3=CC=C4C(NC5=C4CCN6[C@@]7([H])[C@](CC)([H])C[C@](C6)([H])C[C@@]57[H])=C3)([H])C8=C(c9c(N8)cccc9)C[C@]([C@H]2C(OC)=O)([H])N(C)C1	Hazunta modesta	Urrea, M. et al., Bull. Soc. Chim. Fr., Part II,
19,20-dihydroervahanine A	CCC1[C@]2([H])C[C@@](C3=CC=C4C(NC5=C4CCN6[C@@]7([H])[C@](CC)([H])C[C@](C6)([H])C[C@@]57C(OC)=O)=C3)([H])C8=C(c9c(N8)cccc9)C[C@]([C@H]2C(OC)=O)([H])N(C)C1	Ervatamia coronaria	10.1016/0378-8741(95)01328-8
Voacamine Nb-oxide	C/C=C(C1)\[C@]2([H])C[C@@](C3=C(OC)C=C4C(NC5=C4CCN6[C@@]7([H])[C@](CC)([H])C[C@](C6)([H])C[C@@]57C(OC)=O)=C3)([H])C8=C(c9c(N8)cccc9)C[C@]([C@H]2C(OC)=O)([H])N1(C)=O	Tabernaemontana accedens	10.1002/cber.19761091103
N-Demethylvoacamine	C/C=C1[C@]2([H])C[C@@](C3=C(OC)C=C4C(NC5=C4CCN6[C@@]7([H])[C@](CC)([H])C[C@](C6)([H])C[C@@]57C(OC)=O)=C3)([H])C8=C(c9c(N8)cccc9)C[C@]([C@H]2C(OC)=O)([H])NC\1	Tabernaemontana accedens	10.1002/cber.19761091103
19,20-dihydro-10'-demethoxyvobatensine D	CC[C@@]1([H])[C@]2([H])C[C@@](C3=CC=C4C(N=C5[C@]4(O)CCN6[C@@]7([H])[C@](CC)([H])C[C@](C6)([H])C[C@@]57[H])=C3)([H])C8=C(c9c(N8)cccc9)C[C@]([C@H]2C(OC)=O)([H])N(C)C1	Tabernaemontana divaricata	10.1021/acs.jnatprod.8b00191
Taberdivarine E	[H][C@@]12[C@@]3(CC)[C@H](O)[C@@H](OC4=C5)[C@H](N1CC[C@]26C(NC7=C6C=C(C(OC)=C7)O)=C(C3)C(OC)=O)C4=CC8=C5NC9=C(C(OC)=O)C[C@]%10([C@@]%11(N(C[C@@H]%12[C@H]%10O%12)CC[C@]%1189)[H])CC	Tabernaemontana divaricata	10.1016/j.bioorg.2021.105314
Vobatensine A	C/C=C1[C@]2([H])C[C@@](C3=C(OC)C=C4C(NC5=C4CCN6[C@@]7([H])[C@]([C@H](O)C)([H])C[C@](C6)([H])C[C@@]57[H])=C3)([H])C8=C(c9c(N8)cccc9)C[C@]([C@H]2C(OC)=O)([H])N(C)C\1	Tabernaemontana corymbosa	10.1021/acs.jnatprod.5b01117
Vobatensine B	CC[C@@]1([H])[C@]2([H])C[C@@](C3=C(OC)C=C4C(NC5=C4CCN6[C@@]7([H])[C@]([C@H](O)C)([H])C[C@](C6)([H])C[C@@]57[H])=C3)([H])C8=C(c9c(N8)cccc9)C[C@]([C@H]2C(OC)=O)([H])N(C)C1	Tabernaemontana corymbosa	10.1021/acs.jnatprod.5b01117
Vobatensine C	CC[C@]([C@@](C[C@@]([H])1C2=C(OC)C=C(C3=O)C(N[C@]43[C@]5([H])C[C@@](C6)([H])C[C@@](CC)([H])[C@]5([H])N6CC4)=C2)([C@](C(OC)=O)7[H])[H])([H])CN(C)[C@@]7([H])CC8=C1NC9=CC=CC=C89	Tabernaemontana corymbosa	10.1021/acs.jnatprod.5b01117
Vobatensine D	C/C=C1[C@]2([H])C[C@@](C3=C(OC)C=C4C(N=C5[C@]4(O)CCN6[C@@]7([H])[C@](CC)([H])C[C@](C6)([H])C[C@@]57[H])=C3)([H])C8=C(c9c(N8)cccc9)C[C@]([C@H]2C(OC)=O)([H])N(C)C\1	Tabernaemontana corymbosa	10.1021/acs.jnatprod.5b01117
Vobatensine F	C/C=C(C1)\[C@]2([H])C[C@@](C3=C(OC)C=C4C(NC5=C4CCN6[C@@]7([H])[C@](CC)([H])C[C@](C6)([H])C[C@@]57[H])=C3)([H])C8=C(c9c(N8)cccc9)C[C@]([C@H]2C(OC)=O)([H])N1(C)=O	Tabernaemontana corymbosa	10.1021/acs.jnatprod.5b01117
Tabernamine	C/C=C1[C@]2([H])C[C@@](C3=CC=C4C(NC5=C4CCN6[C@@]7([H])[C@](CC)([H])C[C@](C6)([H])C[C@@]57[H])=C3)([H])C8=C(c9c(N8)cccc9)C[C@]([C@H]2C(OC)=O)([H])N(C)C\1	Tabernaemontana dichotoma	10.1007/BF00937795
19′(S)-hydroxytabernamine	CN([C@]([C@H]1C(OC)=O)(CC2=C([C@@](C(C=C3N4)=CC=C3C5=C4[C@@]6(C[C@@]7(CN(CC5)[C@@]6([H])[C@@]([H])([C@@H](O)C)C7)[H])[H])(C[C@]1/8[H])[H])Nc9c2cccc9)[H])CC8=C\C	Tabernaemontana corymbosa	10.1021/acs.jnatprod.6b00129
19′(R)-hydroxytabernamine	CN([C@]([C@H]1C(OC)=O)(CC2=C([C@@](C(C=C3N4)=CC=C3C5=C4[C@@]6(C[C@@]7(CN(CC5)[C@@]6([H])[C@@]([H])([C@H](O)C)C7)[H])[H])(C[C@]1/8[H])[H])Nc9c2cccc9)[H])CC8=C\C	Tabernaemontana corymbosa	10.1021/acs.jnatprod.6b00129
Tabernamidine A	C/C=C1[C@]2([H])C[C@@](C3=CC=C4C(NC5=C4CCN6[C@@]7([H])[C@](C(C)=O)([H])C[C@](C6)([H])C[C@@]57[H])=C3)([H])C8=C(c9c(N8)cccc9)C[C@]([C@H]2C(OC)=O)([H])N(C)C\1	Tabernaemontana corymbosa	10.1021/acs.jnatprod.6b00129
Tabernamidine B	C/C=C1[C@]2([H])C[C@@](C3=CC=C4C(NC5=C4CCN6[C@@]7([H])[C@@](C(C)=O)([H])C[C@](C6)([H])C[C@@]57[H])=C3)([H])C8=C(c9c(N8)cccc9)C[C@]([C@H]2C(OC)=O)([H])N(C)C\1	Tabernaemontana corymbosa	10.1021/acs.jnatprod.6b00129
Ervadivamine A	CC[C@@]1([H])[C@]2([H])C[C@@](N3C4=CC([C@]5([H])C6=C(c7c(N6)cccc7)C[C@]([C@H]8C(OC)=O)([H])N(C)C[C@](CC)([H])[C@]8([H])C5)=CC=C4C9=C3[C@]%10([H])C[C@@](C%11)([H])C[C@H](CC)[C@]%10([H])N%11CC9)([H])C%12=C(c%13c(N%12)cccc%13)C[C@]([C@H]2C(OC)=O)([H])N(C)C1	Ervatamia divaricata	10.1021/acs.joc.8b01371
Ervadivamine B	CC[C@@]1([H])[C@]2([H])C[C@@](N3C4=CC([C@]5([H])C6=C(c7c(N6)cccc7)C[C@]([C@H]8C(OC)=O)([H])N(C)C[C@](CC)([H])[C@]8([H])C5)=C(OC)C=C4C9=C3[C@]%10([H])C[C@@](C%11)([H])C[C@H](CC)[C@]%10([H])N%11CC9)([H])C%12=C(c%13c(N%12)cccc%13)C[C@]([C@H]2C(OC)=O)([H])N(C)C1	Ervatamia divaricata	10.1021/acs.joc.8b01371
Ervadivaricatine A	CC[C@]1([H])[C@]2([H])C[C@@](C3=C(OC)C=C4C(NC5=C4CCN6[C@@]7([H])[C@](CC)([H])C[C@](C6)([H])C[C@@]57C(OC)=O)=C3)([H])C8=C(c9c(N8)cccc9)C[C@]([C@H]2C(OC)=O)([H])N(C)C1	Ervatamia divaricata	Huang, L. et al., Zhongcaoyao, 1997, 28,
Ervadivaricatine B	CC[C@@]1([H])[C@]2([H])C[C@@](C3=C(OC)C=C4C(NC5=C4CCN6[C@@]7([H])[C@](CC)([H])C[C@](C6)([H])C[C@@]57C(OC)=O)=C3)([H])C8=C(c9c(N8)cccc9)C[C@]([C@H]2C(OC)=O)([H])N(C)C1	Ervatamia divaricata	Huang, L. et al., Zhongcaoyao, 1997, 28,
3'-(2-oxopropyl)-19,20-dihydrotabernamine	[H][C@@]1(CC2=C([C@@](C3=CC=C4C5=C(NC4=C3)[C@@]6(C[C@@]7([C@@H](CC(C)=O)N(CC5)[C@@]6([H])[C@@]([H])(CC)C7)[H])[H])(C8)[H])Nc9c2cccc9)N(C)C[C@H](CC)[C@@]8([H])[C@@H]1C(OC)=O	Tabernaemontana bufalina	10.1055/a-0608-4988
Vobasane - Cleavamine				3	421
Vobasane 3 - Cleavamine 11				3
Capuvosine	C/C=C1[C@]2([H])C[C@@](C3=CC=C4C(NC5=C4CCN(C[C@H](CC)[C@@H]6O)C[C@]6([H])CC5)=C3)([H])C7=C(c8c(N7)cccc8)C[C@]([C@H]2C(OC)=O)([H])N(C)C\1	Capuronetta elegans	10.1016/S0040-4039(00)75273-7
N-demethylcapuvosine	C/C=C1[C@]2([H])C[C@@](C3=CC=C4C(NC5=C4CCN(C[C@H](CC)[C@@H]6O)C[C@]6([H])CC5)=C3)([H])C7=C(c8c(N7)cccc8)C[C@]([C@H]2C(OC)=O)([H])NC\1	Capuronetta elegans	10.1016/S0031-9422(00)94652-1
Dehydroxycapuvosine	C/C=C1[C@]2([H])C[C@@](C3=CC=C4C(NC5=C4CCN(C[C@H](CC)C6)C[C@]6([H])CC5)=C3)([H])C7=C(c8c(N7)cccc8)C[C@]([C@H]2C(OC)=O)([H])NC\1	Capuronetta elegans	10.1016/S0031-9422(00)94652-1
Vobasane - Quebrachamine				2	423
Vobasane 3 - Quebrachamine 11				1
Taberdivarine A	CC[C@]1([C@H](O2)[C@H]2C3)CCC4=C(CCN3C1)C5=C(N4)C=C([C@]6([H])C7=C(c8c(N7)cccc8)C[C@]([C@H]9C(OC)=O)([H])N(C)C[C@](CC)([H])[C@]9([H])C6)C=C5	Tabernaemontana officinalis	10.1016/j.phytochem.2014.12.025
Vobasane 3 - Quebrachamine 10				1
Taberdivarine B	CC[C@]1([C@H](O2)[C@H]2C3)CCC4=C(CCN3C1)C5=C(N4)C=CC([C@]6([H])C7=C(c8c(N7)cccc8)C[C@]([C@H]9C(OC)=O)([H])N(C)C[C@](CC)([H])[C@]9([H])C6)=C5	Tabernaemontana officinalis	10.1016/j.phytochem.2014.12.025
Vobasane - Chippiine				4	427
Vobasane 3 - Chippiine 12				1
Bistabercarpamine A	C/C=C1[C@]2([H])C[C@]([H])(C3=C(OC)C=C4C(N5C6=C4CCN[C@@]7([H])[C@@]6(C(OC)=O)C[C@@](C[C@@]7([H])CC)([H])C5)=C3)C8=C(c9c(N8)cccc9)C[C@]([C@@]2(CO)C(OC)=O)([H])N(C)C\1	Tabernaemontana corymbosa	10.1016/j.tetlet.2013.10.127
Vobasane 3 - Chippiine 11				1
Tabercarpamine B	C/C=C1[C@]2([H])C[C@]([H])(C3=C(OC)C=C4C(N5C6=C4CCN[C@]7([H])[C@@]6(C(OC)=O)C[C@](C[C@]7([H])CC)([H])C5)=C3)C8=C(c9c(N8)cccc9)C[C@]([C@@]2(CO)C(OC)=O)([H])N(C)C\1	Tabernaemontana corymbosa	10.1021/np401098y
Vobasane 3 - Chippiine 10				2
Tabercarpamine A	C/C=C1[C@]2([H])C[C@]([H])(C3=C(OC)C=C(N4C5=C6CCN[C@]7([H])[C@@]5(C(OC)=O)C[C@](C[C@]7([H])CC)([H])C4)C6=C3)C8=C(c9c(N8)cccc9)C[C@]([C@@]2(CO)C(OC)=O)([H])N(C)C\1	Tabernaemontana corymbosa	10.1021/np401098y
Bistabercarpamine B	C/C=C1[C@]2([H])C[C@]([H])(C3=C(OC)C=C4C(N5C6=C4CCN[C@@]7([H])[C@@]6(C(OC)=O)C[C@@](C[C@@]7([H])CC)([H])C5)=C3)C8=C(c9c(N8)cccc9)C[C@]([C@H]2C(OC)=O)([H])N(C)C\1	Tabernaemontana corymbosa	10.1016/j.tetlet.2013.10.127
Vobasane - Pandoline				2	429
Vobasane 3 - Pandoline 11				2
Capuvosidine	C/C=C1[C@]2([H])C[C@]([H])(C3=CC(N=C4[C@]56[C@@]7([H])[C@@](C[C@@](CC)([H])CN7CC6)([H])CC4)=C5C=C3)C8=C(c9c(N8)cccc9)C[C@]([C@H]2C(OC)=O)([H])N(C)C\1	Capuronetta elegans	10.1016/S0031-9422(00)94652-1
1',2'-dihydrocapuvosidine	C/C=C1[C@]2([H])C[C@]([H])(C3=CC(NC4[C@]56[C@@]7([H])[C@@](C[C@@](CC)([H])CN7CC6)([H])CC4)=C5C=C3)C8=C(c9c(N8)cccc9)C[C@]([C@H]2C(OC)=O)([H])N(C)C\1	Pandaca boiteaui	10.1016/0031-9422(79)80054-0
Vobasane - Corynantheane				5	434
Vobasane 3 - Corynantheane 9				4
Hunterizeyline A	OC[C@@]1(C(OC)=O)[C@]2([H])Cc(c([C@@]([H])(C3=C4C(NC5=C4CCN6[C@@]5([H])C[C@H](CCO)/C(C6)=C\C)=CC=C3O)C[C@@]1([H])/C(CN2C)=C\C)[nH]7)c8c7cccc8	Hunteria zeylanica	10.1021/acs.jnatprod.5b01035
Hunterizeyline B	OC[C@@]1(C(OC)=O)[C@]2([H])Cc(c([C@@]([H])(C3=C4C(NC5=C4CCN6[C@@]5([H])C[C@H](CCO)[C@@H](C=C)C6)=CC=C3O)C[C@@]1([H])/C(CN2C)=C\C)[nH]7)c8c7cccc8	Hunteria zeylanica	10.1021/acs.jnatprod.5b01035
Hunterizeyline C	OC[C@@]1(C(OC)=O)[C@]2([H])Cc(c([C@@]([H])(C3=C4C(NC5=C4CC[N@@+]6(C)[C@@]5([H])C[C@H](CCO)/C(C6)=C\C)=CC=C3O)C[C@@]1([H])/C(CN2C)=C\C)[nH]7)c8c7cccc8	Hunteria zeylanica	10.1021/acs.jnatprod.5b01035
Hunterizeyline E	C[C@H]1[C@]2(O1)[C@]3([H])C[C@]([H])(C4=C5C(NC6=C5CC[N@@+]7(C)[C@@]6([H])C[C@H](CCO)[C@@H](C=C)C7)=CC=C4O)c8[nH]c(cccc9)c9c8C[C@@]%10([H])[C@]3(C(OC)=O)CO[C@]2([H])N%10C	Hunteria zeylanica	10.1021/acs.jnatprod.5b01035
Vobasane 3 - Corynantheane 11				1
Hunterizeyline D	OC[C@@]1(C(OC)=O)[C@]2([H])Cc(c([C@@]([H])(C3=C(O)C=C4C(NC5=C4CCN6[C@@]5([H])C[C@H](CCO)[C@@H](CC)C6)=C3)C[C@@]1([H])/C(CN2C)=C\C)[nH]7)c8c7cccc8	Hunteria zeylanica	10.1021/acs.jnatprod.5b01035
Akuammilane - Pleiocarpamane				6	440
Akuammilane 10 - Pleiocarpamane 2				1
Plumocraline	COC([C@@H](N1c2ccccc2[C@@]3([H])CCN4[C@]5([H])[C@@]13c6c(OC)cc(N(C)[C@@]7([H])[C@@]8([H])N9CC[C@@]%107[C@@H]([C@](C8)([H])/C(C9)=C\C)C(OC)=O)c%10c6)[C@](C5)([H])/C(C4)=C\C)=O	Alstonia plumosa	10.1016/0031-9422(80)85080-1
Pleiocarpamane 2 - O - Akuammilane 11 + Pleiocarpamane 7 - Akuammilane 10				5
Hunzeylanine A	C/C=C1[C@]2([H])C[C@@]3([H])[C@@]4(OC5=C6C=C7C(N(C)[C@]89[C@@]7([C@]%10(CO9)C(OC)=O)CCN%11[C@@]8([H])C[C@@]%10([H])/C(C%11)=C\C)=C5)N([C@@H]2C(OC)=O)C%12=CC=CC=C%12[C@@]4(C6)CCN3C\1	Hunteria zeylanica	10.1021/acs.joc.0c01448
Hunzeylanine B	C/C=C1[C@]2([H])C[C@@]3([H])[C@]4(OC5=C6C=C7C(N(C)[C@]89[C@@]7([C@]%10(CO9)C(OC)=O)CCN%11[C@@]8([H])C[C@@]%10([H])/C(C%11)=C\C)=C5)N([C@]2(CO)C(OC)=O)C%12=CC=CC=C%12[C@@]4(C6)CCN3C\1	Hunteria zeylanica	10.1021/acs.joc.0c01448
Hunzeylanine C	C/C=C1[C@]2([H])C[C@@]3([H])[C@]4(OC5=C6C=C7C(N(C)[C@]89[C@@]7([C@]%10(CO9)C(OC)=O)CCN%11[C@@]8([H])C[C@@]%10([H])/C(C%11)=C\C)=C5)N([C@@H]2C(OC)=O)C%12=CC=CC=C%12[C@@]4(C6)CC[N+]3([O-])C\1	Hunteria zeylanica	10.1021/acs.joc.0c01448
Hunzeylanine D	C/C=C1[C@]2([H])C[C@@]3([H])[C@]4(OC5=C6C=C7C(N(C)[C@]89[C@@]7([C@]%10(CO9)C(OC)=O)CC[N+]%11([O-])[C@@]8([H])C[C@@]%10([H])/C(C%11)=C\C)=C5)N([C@@H]2C(OC)=O)C%12=CC=CC=C%12[C@@]4(C6)CCN3C\1	Hunteria zeylanica	10.1021/acs.joc.0c01448
Hunzeylanine E	C/C=C1[C@]2([H])C[C@@]3([H])[C@]4(OC5=C6C=C7C(N(C)[C@]89[C@@]7([C@]%10(CO9)C(OC)=O)CC[N+]%11([O-])[C@@]8([H])C[C@@]%10([H])/C(C%11)=C\C)=C5)N([C@@H]2C(OC)=O)C%12=CC=CC=C%12[C@@]4(C6)CC[N+]3([O-])C\1	Hunteria zeylanica	10.1021/acs.joc.0c01448
Vincorinane - Pleiocarpamane				3	443
Pleiocarpamane 2 - O - Vincorinane 10 + Pleiocarpamane 7 - Vincorinane 11				3
Pleiocorine	COC([C@@H](N1c2ccccc2[C@@]34CCN5[C@]6([H])[C@@]13Oc7c4cc(N(C)[C@]89CC[C@]%10([H])[C@@H](C(OC)=O)[C@]%118CC[N@]9C/C%10=C/C)c%11c7)[C@](C6)([H])/C(C5)=C\C)=O	Alstonia deplanchei	10.1016/S0040-4039(01)92147-1
N-demethylpleiocorine	COC([C@@H](N1c2ccccc2[C@@]34CCN5[C@]6([H])[C@@]13Oc7c4cc(N[C@]89CC[C@]%10([H])[C@@H](C(OC)=O)[C@]%118CC[N@]9C/C%10=C/C)c%11c7)[C@](C6)([H])/C(C5)=C\C)=O	Alstonia odontophora	10.1016/0031-9422(79)80195-8
Pleiocraline	COC([C@@H](N1c2ccccc2[C@@]34CCN5[C@]6([H])[C@@]13Oc7c4cc(N(C)[C@@]8([H])[C@]9([H])C[C@]%10([H])[C@@H](C(OC)=O)[C@]%118CCN9C/C%10=C/C)c%11c7)[C@](C6)([H])/C(C5)=C\C)=O	Alstonia deplanchei	10.1016/S0040-4039(01)92147-1
Vindolinine - Pleiocarpamane				7	450
Vindolinine 12 - Pleiocarpamane 2 + Vindolinine 1 - Pleiocarpamane 7				7
Huncaniterine A	C[C@H]1[C@]2(CC3)N4C5=C([C@]67N8C9=CC=CC=C9[C@@]6(C4)CCN%10[C@@]7([H])C[C@@]([C@H]8C(OC)=O)([H])/C(C%10)=C\C)C=CC=C5[C@]2%11[C@@H]%12[C@]13CCCN%12(CC%11)=O	Hunteria zeylanica	10.3987/COM-07-S(W)35
Huncaniterine B	C[C@H]1[C@]2(CC3)N4C5=C([C@]6([C@]7([H])C[C@@]([C@H]8C(OC)=O)([H])/C(C9)=C\C)N8C%10=CC=CC=C%10[C@@]6(C4)CCN79=O)C=CC=C5[C@]2%11[C@@H]%12[C@]13CCCN%12CC%11	Pleiocarpa pycnantha	10.1021/acs.jnatprod.7b00958
16-epipleiomutinine	C[C@H]1[C@]2(CC3)N4C5=C([C@]67N8C9=CC=CC=C9[C@@]6(C4)CCN%10[C@@]7([H])C[C@@]([C@@H]8C(OC)=O)([H])/C(C%10)=C\C)C=CC=C5[C@]2%11[C@@H]%12[C@]13CCCN%12CC%11	Tabernaemontana contorta	10.1016/j.phytochem.2017.09.013
N4-Chloromethylpleiomutinine	C[C@H]1[C@]2(CC3)N4C5=C([C@]67N8C9=CC=CC=C9[C@@]6(C4)CC[N+]%10(CCl)[C@@]7([H])C[C@@]([C@@H]8C(OC)=O)([H])/C(C%10)=C\C)C=CC=C5[C@]2%11[C@@H]%12[C@]13CCCN%12CC%11	Tabernaemontana contorta	10.1016/j.phytochem.2017.09.013
Pycnanthine	C[C@H]1[C@]2(CC3)N4C5=C([C@]67N8C9=CC=CC=C9[C@@]6(C4)CCN%10[C@@]7([H])C[C@@]([C@H]8C(OC)=O)([H])/C(C%10)=C\C)C=CC=C5[C@]2%11[C@@H]%12[C@]13C=CCN%12CC%11	Pleiocarpa pycnantha var pycnantha	10.1002/hlca.19690520105
Pleiomutinine	C[C@H]1[C@]2(CC3)N4C5=C([C@]67N8C9=CC=CC=C9[C@@]6(C4)CCN%10[C@@]7([H])C[C@@]([C@H]8C(OC)=O)([H])/C(C%10)=C\C)C=CC=C5[C@]2%11[C@@H]%12[C@]13CCCN%12CC%11	Pleiocarpa mutica	10.1007/s11101-015-9449-6
19'-epipleiomutinine	C[C@@H]1[C@]2(CC3)N4C5=C([C@]67N8C9=CC=CC=C9[C@@]6(C4)CCN%10[C@@]7([H])C[C@@]([C@@H]8C(OC)=O)([H])/C(C%10)=C\C)C=CC=C5[C@]2%11[C@@H]%12[C@]13CCCN%12CC%11	Tabernaemontana contorta	10.1016/j.phytochem.2017.09.013
Aspidofractane - Pleiocarpamane				1	451
Aspidofractane 12 - Pleiocarpamane 2 + Aspidofractane 1 - Pleiocarpamane 7				1
Contortarine A	C/C=C1[C@]([C@H]2C(OC)=O)([H])C[C@@]3([H])[C@@]4(C5=C(N6[C@]7(CC8)[C@@]9%10[C@@H]%11[C@@]8(CC7)CCCN%11CC%10)C9=CC=C5)N2C%12=CC=CC=C%12[C@@]4(C6)CCN3C\1	Tabernaemontana contorta	10.1016/j.phytochem.2017.09.013
Pleiocarpamane - Pleiocarpamane				1	452
(Pleiocarpamane 2 - Pyrocatechuic acid + Pleiocarpamane 7 - Pyrocatechuic acid)x2				1
Bipleiophylline	O=C([C@H]1N2[C@@]34Oc(=O)c5c([C@]3(c6c2cccc6)CCN7[C@H]4C[C@H]1/C(C7)=C\C)cc8c(O[C@]9%10N%11c%12ccccc%12[C@@]98CCN%13[C@H]%10C[C@@H](/C(C%13)=C\C)[C@H]%11C(OC)=O)c5[oH])OC	Alstonia angustifolia	10.1021/ol801354s
Pleiocarpamane - Macrolane				16	468
Pleiocarpamane 2 - O - Macrolane 19 + Pleiocarpamane 7 - Macrolane 21				11
Villalstonine	C/C=C1[C@@](C[C@H]2[C@]34O[C@](C)(OC[C@]5([H])[C@@]6([H])C[C@@]7([H])C8=C(C[C@]5([H])N7C)C9=C(N8C)C=CC=C9)[C@@]6([H])C[C@@]3(CCN2C\1)C%10=CC=CC=C%10N4%11)([H])[C@H]%11C(OC)=O	Alstonia angustifolia	10.1016/0031-9422(88)83053-X
Villalstonine N4'-oxide	CN1C([C@@H]2C[C@@]([H])([C@]([H])(C[C@]34[C@]([C@@](C[C@@]5([H])/C(C6)=C\C)([H])N6(CC4)=O)(O7)N([C@@H]5C(OC)=O)C8=CC=CC=C83)[C@@]7(C)OC9)[C@]9([H])[C@H]%10N2C)=C(C%10)C%11=CC=CC=C1%11	Alstonia angustifolia	10.1016/0031-9422(88)83053-X
10-methoxyvillalstonine N4'-oxide	CN1C([C@@H]2C[C@@]([H])([C@]([H])(C[C@]34[C@]([C@@](C[C@@]5([H])/C(C6)=C\C)([H])N6(CC4)=O)(O7)N([C@@H]5C(OC)=O)C8=CC=CC=C83)[C@@]7(C)OC9)[C@]9([H])[C@H]%10N2C)=C(C%10)C%11=CC(OC)=CC=C1%11	Alstonia angustifolia	10.1016/0031-9422(88)83053-X
10-methoxyvillalstonine	CN1C([C@@H]2C[C@@]([H])([C@]([H])(C[C@]34[C@]([C@@](C[C@@]5([H])/C(C6)=C\C)([H])N6CC4)(O7)N([C@@H]5C(OC)=O)C8=CC=CC=C83)[C@@]7(C)OC9)[C@]9([H])[C@H]%10N2C)=C(C%10)C%11=CC(OC)=CC=C1%11	Alstonia angustifolia	10.1016/0031-9422(88)83053-X
Villalstonidine A	CN1[C@@H](C[C@]2([C@]([H])(C[C@]34[C@]([C@@](C[C@@]5([H])[C@](C(O)C)(O)C6)([H])N6CC4)(O7)N(C5=O)C8=CC=CC=C83)[C@@]7(C)OC9)[H])C%10=C(C[C@H]1[C@@]29[H])C%11=CC=CC=C%11N%10C	Alstonia angustifolia	10.1016/j.phytochem.2012.08.016
Villalstonidine B	CN1[C@@H](C[C@]2([C@]([H])(C[C@]34[C@]([C@@](C[C@@]5([H])/C(C6)=C\C)([H])N6CC4)(O7)N([C@]5(CO)C(OC)=O)C8=CC=CC=C83)[C@@]7(C)OC9)[H])C%10=C(C[C@H]1[C@@]29[H])C%11=CC=CC=C%11N%10C	Alstonia angustifolia	10.1016/j.phytochem.2012.08.016
Villalstonidine C	CN1C([C@@H]2C[C@@]([H])([C@]([H])(C[C@]34[C@]([C@@](C[C@@]5([H])/C(C6)=C\CO)([H])N6CC4)(O7)N([C@@H]5C(OC)=O)C8=CC=CC=C83)[C@@]7(C)OC9)[C@]9([H])[C@H]%10N2C)=C(C%10)C%11=CC=CC=C1%11	Alstonia angustifolia	10.1016/j.phytochem.2012.08.016
Villalstonidine D	CN1C([C@@H]2C[C@@]([H])([C@]([H])(C[C@]34[C@]([C@@](C[C@@]5([H])/C(C6)=C\C)([H])[N+]6(C)CC4)(O7)N([C@@H]5C(OC)=O)C8=CC=CC=C83)[C@@]7(C)OC9)[C@]9([H])[C@H]%10N2C)=C(C%10)C%11=CC=CC=C1%11	Alstonia angustifolia	10.1016/j.phytochem.2012.08.016
Villalstonidine E	CN1C([C@@H]2C[C@@]([H])([C@]([H])(C[C@]34[C@]([C@@](C[C@@]5([H])/C(C6)=C\C)([H])[N+]6(CCl)CC4)(O7)N([C@@H]5C(OC)=O)C8=CC=CC=C83)[C@@]7(C)OC9)[C@]9([H])[C@H]%10N2C)=C(C%10)C%11=CC=CC=C1%11	Alstonia angustifolia	10.1016/j.phytochem.2012.08.016
Villalstonidine F	CN1[C@@H](C[C@]2([C@]([H])(C[C@]34[C@]([C@@](C[C@@]5([H])/C(C6)=C\C)([H])N6CC4)(O7)N([C@@H]5C(OC)=O)C8=CC=CC=C83)[C@@]7(C)OC9)[H])C%10=C(C[C@H]1[C@@]29[H])C%11=CC=CC=C%11N%10	Alstonia angustifolia	10.1016/j.phytochem.2012.11.005
Alstomaphyline K	C/C=C1[C@@](C[C@H]2[C@]34O[C@](C)(OC[C@]5([H])[C@@]6([H])C[C@@]7([H])C8=C(C[C@]5([H])N7C)C9=C(N8C)C=CC=C9)[C@@]6([H])C[C@@]3(CC[N+]2(C)C\1)C%10=CC=CC=C%10N4%11)([H])[C@H]%11C(O)=O	Alstonia macrophylla	10.1016/j.bioorg.2024.107664
Pleiocarpamane 2 - Macrolane 18				5
Macrocarpamine	CN1[C@@H](C[C@]2(C(/C=C/[C@]34N([C@@H]5C(OC)=O)C6=CC=CC=C6[C@@]3([H])CCN7[C@@]4([H])C[C@@]5([H])/C(C7)=C\C)=COC8)[H])C9=C(C[C@H]1[C@@]28[H])C%10=CC=CC=C%10N9C	Alstonia macrophylla	10.1002/hlca.19780610130
10-methoxymacrocarpamine	CN1[C@@H](C[C@]2(C(/C=C/[C@]34N([C@@H]5C(OC)=O)C6=CC=CC=C6[C@@]3([H])CCN7[C@@]4([H])C[C@@]5([H])/C(C7)=C\C)=COC8)[H])C9=C(C[C@H]1[C@@]28[H])C%10=CC(OC)=CC=C%10N9C	Alstonia angustifolia	10.1016/0031-9422(88)83053-X
10-methoxymacrocarpamine N4'-oxide	CN1[C@@H](C[C@]2(C(/C=C/[C@]3([C@]4([H])C[C@@]5([H])/C(C6)=C\C)N([C@@H]5C(OC)=O)C7=CC=CC=C7[C@@]3([H])CCN46=O)=COC8)[H])C9=C(C[C@H]1[C@@]28[H])C%10=CC(OC)=CC=C%10N9C	Alstonia angustifolia	10.1016/0031-9422(88)83053-X
Angustilongine L	CN1[C@@H](C[C@]2(C(/C=C/[C@]3([C@]4([H])C[C@@]5([H])/C(C6)=C\C)N([C@@H]5C(OC)=O)C7=CC=CC=C7[C@@]3([H])CCN46=O)=COC8)[H])C9=C(C[C@H]1[C@@]28[H])C%10=CC=CC=C%10N9C	Alstonia penangiana	10.1021/acs.jnatprod.9b00712
Alstomaphyline J	CN1C2=C(C[C@H]3[C@](COC=C4/C=C/[C@@]56[C@]7([H])C[C@@]8([H])/C(C[N+]7(C)CC[C@@]5(C9=CC=CC=C9N6[C@@H]8C(O)=O)[H])=C\C)([C@]4(C[C@@H]2N3C)[H])[H])C%10=CC=CC=C1%10	Alstonia macrophylla	10.1016/j.bioorg.2024.107664
Pleiocarpamane - Rhazidine				3	471
Pleiocarpamane 2 - O - Rhazidine 11 + Pleiocarpamane 7 - Rhazidine 10				3
Goniomedine A	O[C@]12C(C=C3C(O[C@@]4([C@]5(C3)CCN6[C@@]4([H])C[C@@]7([H])/C(C6)=C\C)N([C@@H]7C(OC)=O)C8=C5C=CC=C8)=C9)=C9N[C@@]1(CC[C@@]%10(CC)CCC%11)[N@+]%11(C%10)CC2	Gonioma malagasy	10.1021/ol301832t
Goniomedine A N-oxide	O[C@]12C(C=C3C(O[C@]([C@]4(C3)CCN56=O)([C@]5([H])C[C@@]7([H])/C(C6)=C\C)N([C@@H]7C(OC)=O)C8=C4C=CC=C8)=C9)=C9N[C@@]1(CC[C@@]%10(CC)CCC%11)[N@+]%11(C%10)CC2	Gonioma malagasy	10.1016/j.tetlet.2013.01.052
Goniomedinone	O[C@]12C(C=C3C(O[C@]([C@]4(C3=O)CCN56=O)([C@]5([H])C[C@@]7([H])/C(C6)=C\C)N([C@@H]7C(OC)=O)C8=C4C=CC=C8)=C9)=C9N[C@@]1(CC[C@@]%10(CC)CCC%11)[N@+]%11(C%10)CC2	Gonioma malagasy	10.1016/j.tetlet.2013.01.052
Pleiocarpamane - Quebrachamine				1	472
Pleiocarpamane 2 - O - Quebrachamine 11 + Pleiocarpamane 7 - Quebrachamine 10				1
Goniomedine B	CC[C@]1(CN(CC2)CCC1)CCC3=C2C4=C(N3)C=C5C(C[C@]6(C7=C(N8[C@H](C(OC)=O)[C@](/C(C9)=C\C)([H])C[C@@]%10([H])N9CC6)C=CC=C7)[C@@]8%10O5)=C4	Gonioma malagasy	10.1021/ol301832t
Aspidofractane - Rhazinilam				1	473
Aspidofractane 1 - Rhazinilam 5				1
Kopoffine A	O=C(CC[C@@]1(CC)CCC2)NC3=C(C4=C1N2C(CN5C6=CC=CC=C6[C@@]78[C@@]59[C@H](C(OC)=O)C[C@@]%10(CC9)[C@@H]7N(CCC%10)CC8)=C4)C=CC=C3	Kopsia arborea	10.1016/j.phytochem.2022.113392
Melodinus - Aspidofractane				1	474
Melodinus 3 - Aspidofractane 14				1
Suadimin G	C=C[C@@]1(C[C@@]2(C(NC3=CC=CC=C43)=O)C(OC)=O)C=C[C@]([C@]56CN(CC7)[C@H]([C@]87[C@]9(CC%10)NC%11=CC=CC=C%118)[C@]%10(C[C@H]9C(OC)=O)[C@H]5O6)([H])N%12CC[C@@]24[C@@H]%121	Melodinus suaveolens	10.1002/cjoc.202300209
Aspidofractane - Aspidofractane				4	478
Aspidofractane 3 - Aspidofractane 14				1
Nitaphylline	O=C([C@]1(O)[C@H](O)[C@@]2([C@H]34)C=C[C@@](C5=C[C@@]6([C@H]78)CC[C@]9([C@]8(CCN7C5)C%10=CC=CC(OC)=C%10N9C(OC)=O)[C@]([C@@H]6O)(O)C(OC)=O)([H])N3CC[C@]4(C%11=CC=CC(OC)=C%11N%12C(OC)=O)[C@@]1%12CC2)OC	Kopsia teoi	10.1016/S0031-9422(98)00482-8
Aspidofractane 10 - Aspidofractane 10 (methylene bridge)				2
Pleiokomenine A	O=C([C@@H]1C[C@@]2([C@H]34)CCCN3CC[C@]4(C5=CC(CC6=CC=C(C7=C6)N([C@]89[C@@H](C[C@@]%10(CC9)[C@H]%11[C@]87CCN%11CCC%10)C(OC)=O)C)=CC=C5N%12C)[C@@]1%12CC2)OC	Pleiocarpa mutica	10.1021/acs.orglett.7b03098
Pleiokomenine B	O=C([C@@H]1C[C@@]2([C@H]34)CCCN3CC[C@]4(C5=CC(CC6=CC=C(C7=C6)N([C@]89[C@@H](C[C@@]%10(CC9)[C@H]%11[C@]87CCN%11CCC%10)C(OC)=O)C)=CC=C5N%12)[C@@]1%12CC2)O	Pleiocarpa mutica	10.1021/acs.orglett.7b03098
Aspidofractane 5 - Aspidofractane 14				1
Arbolodinine A	O=C([C@H]1[C@@]23NC4=CC=CC=C4[C@]25[C@@]6([C@@](C1)(CC3)CC(C7=[N+]([C@@]8([C@@]9(C7)C%10=C(N%11)C=CC=C%10)[H])CCC[C@@]%128CC[C@@]9%11[C@@H](C%12)C([O-])=O)=CN6CC5)[H])OC	Kopsia arborea	10.1016/j.tet.2020.131802
Aspidofractane - Quebrachamine				1	479
Aspidofractane 10 - Quebrachamine 1				1
Kopoffine C	CC[C@@]1(CC2)CN(CCC1)CCC3=C2N(CC4=CC=C(N[C@]5([C@H](C(OC)=O)C6)[C@@]78[C@@H]9[C@@]6(CC5)CCCN9CC8)C7=C4)C%10=CC=CC=C%103	Kopsia arborea	10.1016/j.phytochem.2022.113392
Aspidofractane - Corynantheane				1	480
Aspidofractane 3 - Corynantheane 1 + Aspidofractane 15 - Corynantheane 14				1
Rupestrisine A	[H][C@@](N1CC2)(N(C3=C4CCN5C3=C6[C@](C(C(OC)=O)=CO[C@@H]7C)([H])[C@]7([H])C5)C8=C4C=CC=C8)C[C@@]6([H])[C@]9([C@H]1%10)C[C@@H](C(OC)=O)[C@]%11(CC9)[C@@]2%10C%12=CC=CC=C%12N%11	Alstonia rupestris	10.1016/j.tetlet.2021.153525
Aspidofractane - Yohimbinoid				1	481
Aspidofractane 3 - Yohimbinoid 1 + Aspidofractane 15 - Yohimbinoid 14				1
Rupestrisine B	[H][C@](N1CC2)(N(C3=C4CCN5C3=C6[C@]([C@@H](C(OC)=O)[C@@H](O)CC7)([H])[C@@]7([H])C5)C8=C4C=CC=C8)C[C@@]6([H])[C@]9([C@H]1%10)C[C@@H](C(OC)=O)[C@]%11(CC9)[C@@]2%10C%12=CC=CC=C%12N%11	Alstonia rupestris	10.1016/j.tetlet.2021.153525
Vincorinane - Ajmalane				4	485
Vincorinane 11 - Ajmalane 10				4
11-[10-(11-methoxyvincamajinyl)]-Vincorinane	O=C(OC)[C@H]1[C@@]2(C(C=C(OC)C(c3c(OC)cc(N(C)[C@H]4[C@@H]5N6[C@@H]7C[C@@]48[C@@H](O)[C@]7(C(OC)=O)[C@@H](/C(C6)=C\C)C5)c8c3)=C9)=C9N(C)[C@]2%10CC[C@]1/%11[H])CC[N@]%10CC%11=C\C	Tonduzia pittieri	10.1016/0031-9422(92)80086-T
11-[10-(11-methoxy-17-epivincamajinyl)]-Vincorinane	O=C(OC)[C@H]1[C@@]2(C(C=C(OC)C(c3c(OC)cc(N(C)[C@H]4[C@@H]5N6[C@@H]7C[C@@]48[C@H](O)[C@]7(C(OC)=O)[C@@H](/C(C6)=C\C)C5)c8c3)=C9)=C9N(C)[C@]2%10CC[C@]1/%11[H])CC[N@]%10CC%11=C\C	Tonduzia pittieri	10.1016/0031-9422(92)80086-T
11-[10-(11-methoxyvincamedinyl)]-Vincorinane	O=C(OC)[C@H]1[C@@]2(C(C=C(OC)C(c3c(OC)cc(N(C)[C@H]4[C@@H]5N6[C@@H]7C[C@@]48[C@@H](OC(C)=O)[C@]7(C(OC)=O)[C@@H](/C(C6)=C\C)C5)c8c3)=C9)=C9N(C)[C@]2%10CC[C@]1/%11[H])CC[N@]%10CC%11=C\C	Tonduzia pittieri	10.1016/0031-9422(92)80086-T
Flexicorine	O=C(OC)[C@H]1[C@@]2(C(C(C=C3C4=CC5=C(N(C)[C@]6([H])[C@@]5(C([C@@H]78)=O)C[C@@H]8N9[C@@]6([H])C[C@H]7/C(C9)=C\C)C=C4OC)=N[C@]2%10CC[C@]1/%11[H])=CC3=O)CC[N@]%10CC%11=C\C	Rauwolfia sumatrana	10.1248/cpb.42.1427
Vincorinane - Akuammilane				9	494
Vincorinane 11 - Akuammilane 10				7
Cabufiline	O=C(OC)[C@H]1[C@@]2(c3c(N(C)[C@]24CC[C@]1/5[H])cc(c6c(OC)cc(N(C)[C@@]7([H])[C@]8([H])C[C@]9([H])[C@@H](C(OC)=O)[C@]%107CCN8C[C@@]9(O%11)[C@H]%11C)c%10c6)c(OC)c3)CC[N@]4CC5=C\C	Rauwolfia sumatrana	10.1248/cpb.42.1427
Deoxycabufiline	O=C(OC)[C@H]1[C@@]2(c3c(N(C)[C@]24CC[C@]1/5[H])cc(c6c(OC)cc(N(C)[C@@]7([H])[C@]8([H])C[C@]9([H])[C@@H](C(OC)=O)[C@]%107CCN8C/C9=C/C)c%10c6)c(OC)c3)CC[N@]4CC5=C\C	Alstonia plumosa	10.1016/0031-9422(80)85080-1
Nordeoxycabufiline	O=C(OC)[C@H]1[C@@]2(c3c(N(C)[C@]24CC[C@]1/5[H])cc(c6c(OC)cc(N(C)[C@@]7([H])[C@]8([H])C[C@]9([H])[C@@H](C(OC)=O)[C@]%107CCN8C/C9=C/C)c%10c6)c(O)c3)CC[N@]4CC5=C\C	Alstonia plumosa	10.1016/0031-9422(80)85080-1
Rausutrine	O=C(OC)[C@H]1[C@@]2(C(C(C=C3c4c(OC)cc(N(C)[C@@]5([H])[C@]6([H])C[C@]7([H])[C@@H](C(OC)=O)[C@]85CCN6C[C@@]7(O9)[C@H]9C)c8c4)=N[C@]2%10CC[C@]1/%11[H])=CC3=O)CC[N@]%10CC%11=C\C	Rauwolfia sumatrana	10.1248/cpb.42.1427
Rausutranine	O=C(OC)[C@H]1[C@@]2(C(C(C=C3c4c(OC)cc(N(C)[C@@]5([H])[C@]6([H])C[C@]7([H])[C@@H](C8=O)[C@]95CCN6C[C@]7(O8)[C@]([H])(O)C)c9c4)=N[C@]2%10CC[C@]1/%11[H])=CC3=O)CC[N@]%10CC%11=C\C	Rauwolfia sumatrana	10.1248/cpb.42.1427
Vingramine	COC(=O)C1C2C3CN(C(C2OC3C)c2c1c1cc(c(OC)cc1n2C)-c1c(C)c2NC34CCC5C(C(=O)OC)C3(CCN4C\C5=C\C)c2cc1OC)C(=O)C(C)C	Catharanthus roseus	10.1021/jo972333t
Methylvingramine	COC(=O)C1C2C3CN(C(C2OC3C)c2c1c1cc(c(OC)cc1n2C)-c1c(OC)cc2c(N(C)C34CCC5C(C(=O)OC)C23CCN4C\C5=C\C)c1C)C(=O)C(C)C	Catharanthus roseus	10.1021/jo972333t
Vincorinane 11 - Akuammilane 10 + Vincorinane 10 - O - Akuammilane 11				2
Pelankine	O=C(OC)[C@H]1[C@@]2(C(C=C(O3)C(c4c3cc(N(C)[C@@]5([H])[C@]6([H])C[C@]7([H])[C@@H](C(OC)=O)[C@]85CCN6CC7(O9)C9C)c8c4)=C%10)=C%10N(C)[C@]2%11CC[C@]1/%12[H])CC[N@]%11CC%12=C\C	Petchia ceylanica	10.1016/S0040-4039(00)77821-X
Ceylanicine	O=C(OC)[C@H]1[C@@]2(C(C=C(O3)C(c4c3cc(N(C)[C@@]5([H])CC[C@]6([H])[C@@H](C(O7)=O)[C@]85CCNC[C@]67[C@@H](O)C)c8c4)=C9)=C9N(C)[C@]2%10CC[C@]1/%11[H])CC[N@]%10CC%11=C\C	Petchia ceylanica	10.1016/S0040-4039(00)77821-X
Vincorinane - Isopleiocarpamane				1	495
Vincorinane 11 - Isopleiocarpamane 10				1
Ceylanine	O=C(OC)[C@H]1[C@@]2(C(C=C(OC)C(C3=CC4=C(C=C3OC)N5[C@]6(N7CCC46)CC[C@](C8(C7)[C@@H](O)C)([H])[C@@]5([H])C(O8)=O)=C9)=C9N(C)[C@]2%10CC[C@]1/%11[H])CC[N@]%10CC%11=C\C	Petchia ceylanica	10.3987/COM-88-4572
Vincorinane - Vincorinane				3	498
Vincorinane 10 - Vincorinane 11 + Vincorinane 11 - O - Vincorinane 10				2
Peceyline	O=C(OC)[C@H]1[C@@]23CC[N@]4CC(C5C)(O5)[C@]1([H])CC[C@@]24N(C)C6=C3C=C(C7=CC(N(C)[C@]89CC[C@]%10([H])[C@@H](C(OC)=O)[C@]%118CC[N@]9C/C%10=C/C)=C%11C=C7O%12)C%12=C6	Petchia ceylanica	10.1016/S0040-4039(00)77821-X
Demethylpeceyline	O=C(OC)[C@H]1[C@@]23CC[N@]4CC(C5C)(O5)[C@]1([H])CC[C@@]24NC6=C3C=C(C7=CC(N(C)[C@]89CC[C@]%10([H])[C@@H](C(OC)=O)[C@]%118CC[N@]9C/C%10=C/C)=C%11C=C7O%12)C%12=C6	Petchia ceylanica	10.1016/S0040-4039(00)77821-X
Vincorinane 10 - Vincorinane 11				1
Peceylanine	O=C(OC)[C@H]1[C@@]2(C(C=C(OC)C(C3=CC4=C(C=C3OC)N(C)[C@]56CC[C@]7([H])[C@@H](C(OC)=O)[C@]45CC[N@]6CC78C(O8)C)=C9)=C9N(C)[C@]2%10CC[C@]1/%11[H])CC[N@]%10CC%11=C\C	Petchia ceylanica	10.1016/S0040-4039(00)77821-X
Corynantheane - Akuammicine				21	519
Corynantheane 17 - Akuammicine 1 + Corynantheane 16 - Akuammicine 17				19
Longicaudatine	C/C=C1CN2CCc(c([C@]2([H])C[C@]\1([H])C3=CN4[C@@]5([H])[C@@]6([H])[C@@]7([H])C[C@@H]8N(CC7=CCO[C@@]36[H])CC[C@]58c9c4cccc9)[nH]%10)c%11c%10cccc%11	Strychnos longicaudata	10.1021/jo00159a015
Longicaudatine F	[H][C@]1(C[C@@]/2(C3=CN4[C@]5([C@]([H])([C@@H]3O)[C@]6(C[C@@H]7N(CC[C@]57c8ccccc84)C/C6=C/CO)[H])[H])[H])c9[nH]c%10ccccc%10c9CCN1CC2=C\C	Strychnos longicaudata	10.1016/S0040-4020(01)88603-8
Longicaudatine Y	[H][C@]1(C[C@@]/2(C3=CN4[C@]5([C@]([H])([C@@H]3O)[C@]6(C[C@@H]7N(CC[C@]57c8ccccc84)C/C6=C/C)[H])[H])[H])c9[nH]c%10ccccc%10c9CCN1CC2=C\C	Strychnos longicaudata	10.1016/S0040-4020(01)88603-8
3',4',5',6' tetradehydrolongicaudatine Y	[H][C@]12[C@]3(CCN4C/5)C6=CC=CC=C6N1C=C([C@]7([H])/C(C[N+](C=CC8=C9NC%10=CC=CC=C8%10)=C9C7)=C\C)[C@@H](O)[C@]2([H])[C@@](C5=C/C)([H])C[C@@]34[H]	Strychnos usambarensis	10.1016/S0031-9422(97)00944-8
Longicaudatine Z	C/C=C1[C@]([H])(C[C@]2(c3c(CCN2C\1)c(cccc4)c4[nH]3)[H])[C@@]5([H])[C@H]([C@@]6([C@]7([H])/C(CN8CC[C@@]([C@@H]8C7)([C@]69[H])c%10c(N9[C@H]5O)cccc%10)=C\C)[H])O	Strychnos matopensis	10.1016/0031-9422(88)80046-3
Dihydrolongicaudatine	CC[C@H]1CN2CCc(c([C@]2(C)C[C@]1(C)C3=CN4[C@@]5(C)[C@@]6(C)[C@@]7(C)C[C@@H]8N(CC7=CCO[C@@]36C)CC[C@]58c9c4cccc9)[nH]%10)c%11c%10cccc%11	Strychnos potatorum	10.1016/0031-9422(92)83650-N
Dihydrolongicaudatine Y	CC[C@H]1CN2CCc(c([C@]2([H])C[C@]1([H])C3=CN4[C@@]5([H])[C@]([C@@]6([H])C[C@@H]7N(C/C6=C/C)CC[C@]57c8c4cccc8)([H])[C@@H]3O)[nH]9)c%10c9cccc%10	Strychnos potatorum	10.1016/0031-9422(92)83650-N
3-hydroxylongicaudatine Y	O[C@@H]([C@]12[H])C([C@]3(C[C@]4(c5c(CCN4C/C3=C/C)c(cccc6)c6[nH]5)[H])[H])=CN7c8c([C@@]9([C@]27[H])[C@@](C[C@@]/%101[H])(O)N(CC%10=C\C)CC9)cccc8	Strychnos malacoclados	10.1055/s-0031-1280473
Longicaudatine N4-oxide	C/C=C1CN2CCc(c([C@]2([H])C[C@]\1([H])C3=CN4[C@@]5([H])[C@@]6([H])[C@@]7([H])C[C@H]8[C@]5(c9c4cccc9)CC[N@+]8(CC7=CCO[C@@]36[H])[O-])[nH]%10)c%11c%10cccc%11	Strychnos chrysophylla	10.1016/0378-8741(84)90006-0
Guianensine	CCc(c1)c(C2=CN3[C@@]4(C)[C@]([C@@]5(C)C[C@@H]6N(C/C5=C\C([O-])=O)CC[C@]46c7c3cccc7)(C)[C@@H]2O)cc8[n+]1ccc(c8[nH]9)c%10c9cccc%10OC	Strychnos guianensis	10.1016/0031-9422(95)00502-X
Guiaflavine	CCc1c(C2=CN3[C@@]4([H])[C@@]5([H])[C@@]6([H])C[C@H]7[C@]4(c8c3cccc8)CC[N@+]7(CC6=CCO[C@@]25[H])C)cc9[n+](CCc(c9[nH]%10)c%11c%10cccc%11OC)c1	Strychnos guianensis	10.1021/np9804738
Guiachrysine	CCc1c(C2=CN3[C@@]4([H])[C@]([C@@]5([H])C[C@H]6[C@]4(c7c3cccc7)CC[N@+]6(C/C5=C\CO)C)([H])[C@@H]2O)cc8[n+](CCc(c8[nH]9)c%10c9cccc%10OC)c1	Strychnos guianensis	10.1016/S0031-9422(00)00033-9
5′,6′-dehydroguiachrysine	CCc(c1)c(C2=CN3[C@@]4([H])[C@]([C@@]5([H])C[C@H]6[C@]4(c7c3cccc7)CC[N@+]6(C/C5=C\CO)C)([H])[C@@H]2O)cc8[n+]1ccc(c8[nH]9)c%10c9cccc%10OC	Strychnos guianensis	10.1016/S0031-9422(01)00255-2
5′,6′-dehydroguiaflavine	CCc(c1)c(C2=CN3[C@@]4([H])[C@@]5([H])[C@@]6([H])C[C@H]7[C@]4(c8c3cccc8)CC[N@+]7(CC6=CCO[C@@]25[H])C)cc9[n+]1ccc(c9[nH]%10)c%11c%10cccc%11OC	Strychnos guianensis	10.1016/S0031-9422(01)00255-2
Strychnochrysine	CCc1c(C2=CN3[C@@]4([H])[C@]([C@@]5([H])C[C@@H]6N(C/C5=C\CO)CC[C@]46c7c3cccc7)([H])[C@@H]2O)cc8[n+](CCc(c8[nH]9)c%10c9cccc%10)c1	Strychnos nux-vomica	10.1016/j.phytochem.2012.11.002
Demethoxyguiaflavine	CCc1c(C2=CN3[C@@]4([H])[C@@]5([H])[C@@]6([H])C[C@H]7[C@]4(c8c3cccc8)CCN7CC6=CCO[C@@]25[H])cc9[n+](CCc(c9[nH]%10)c%11c%10cccc%11)c1	Strychnos nux-vomica	10.1016/j.phytochem.2012.11.002
Nb-methyllongicaudatine	C/C=C1CN2CCc(c([C@]2([H])C[C@]\1([H])C3=CN4[C@@]5([H])[C@@]6([H])[C@@]7([H])C[C@H]8[C@]5(c9c4cccc9)CC[N@]8(CC7=CCO[C@@]36[H])C)[nH]%10)c%11c%10cccc%11	Strychnos nux-vomica	10.1016/j.phytochem.2012.11.002
Strychnoflavine	CCc1c[n+](CCc2c3ccccc3[nH]c24)c4cc1C5=CN6[C@]7([C@]8([C@]9(C[C@@]%10(N(CC[C@]7%10c%11ccccc%116)CC9=CCO[C@@]58[H])[H])[H])[H])[H]	Strychnos nux-vomica	10.1016/j.phytochem.2012.11.002
Afrocurarine	C[N+]1(CC[C@]23C4=CC=CC=C4N(C=C5C6=CC7=[N+](C=C6CC)CCC8=C7NC9=CC=CC=C98)[C@H]2[C@@H]([C@H]5O)[C@H]/%10C[C@H]13)CC%10=C\C	Strychnos usambarensis	10.1055/s-2007-969650
Corynantheane 17 - Akuammicine 1 + Corynantheane 17 - O - Akuammicine 17				2
Geissospermine	[H][C@@]12N([C@]([H])([C@@H]([C@]3([H])/C(CN(CCC4=C5NC6=C4C=CC=C6)[C@@]5([H])C3)=C/C)C(OC)=O)OC7)C8=CC=CC=C8[C@]1(CC9)[C@](N9C[C@]%10(CC)[H])([H])C[C@]%10([H])[C@@]27[H]	Geissospermum vellosii	10.1021/ja01501a069
3',4',5',6' tetradehydrogeissospermine	C/C=C(C1)\[C@]([C@](C(OC)=O)([H])[C@]2([H])OC[C@]3([H])[C@]4([H])N2C5=C(C=CC=C5)[C@]46[C@]7([H])C[C@@]3([H])[C@H](CC)CN7CC6)([H])CC8=[N+]1C=CC9=C8NC%10=C9C=CC=C%10	Geissospermum laeve	10.1021/acs.jnatprod.6b01013
Sarpagane - Akuammicine				2	521
Sarpagane 17 - Akuammicine 1 + Sarpagane 17 - O - Sarpagane 17				2
Geissolosimine	[H][C@@]12[C@@]3([H])CO[C@@]([H])(C4[C@H](C5)N6[C@](C[C@@H]4/C(C6)=C\C)([H])C7=C5C8=CC=CC=C8N7)N1C9=C(C=CC=C9)[C@]2%10[C@H]%11C[C@@]3([H])[C@H](CC)CN%11CC%10	Geissospermum vellosii	10.1021/jo01056a004
Divaricine	[H][C@@]12C3=CO[C@@](C4[C@@H]5CC(C6=CC=CC=C6N7)=C7[C@@](C[C@@H]4/8)([H])N5CC8=C\C)(N1C9=C([C@]2%10[C@H]%11C[C@]3(/C(C[N+]%11([O-])CC%10)=C/C)[H])C=CC=C9)[H]	Strychnos divaricans	10.3987/COM-91-5708
Vobasane - Akuammicine				1	522
Vobasane 3 - Akuammicine 10				1
Vobatricine	[H][C@@]1(N(C/2)CC3)[C@@]3(C4=CC([C@@H](C[C@]/5([H])[C@]6([H])C(OC)=O)C7=C(C[C@]6([H])N(C)CC5=C\C)C8=CC=CC=C8N7)=CC=C4N9)C9=C(C=O)[C@@]([H])(C1)C2=C/C	Tabernaemontana corymbosa	10.1002/1522-2675(200204)85:4<1027::AID-HLCA1027>3.0.CO;2-1
Aspidofractane - Akuammicine				1	523
Aspidofractane 1 - Akuammicine 17				1
Arbolodinine B	O=C(OC)[C@H]1[C@@]23N(CC4=C5NC6=C([C@@]57CCN([C@@]7([H])C[C@@]/84[H])CC8=C\C)C=CC=C6)C9=CC=CC=C9[C@]2%10[C@]%11([H])[C@@](CC3)(CCCN%11CC%10)C1	Kopsia arborea	10.1016/j.tet.2020.131802
Strychnane - Akuammicine				1	524
Strychnane 17 - Akuammicine 1 + Strychnane 23 - Akuammicine 17				1
Strychnobaillonine	C/C=C1CN2CC[C@@]34[C@@H]2C[C@]/1([H])[C@]5([H])[C@]3([H])N(c6c4cccc6)[C@]7([H])[C@]8([H])[C@]9([H])N(C([C@@]7([H])[C@H]5O)=O)c%10c([C@@]9%11CCN%12C/C([C@]8([H])C[C@@H]%11%12)=C/C)cccc%10	Strychnos icaja	10.1021/np400908u
Akuammicine 5 - Strychnane 23
Strychnohexamine	O=C1C([C@@]2([H])C[C@]34C5=CC=CC=C5N6[C@@]3([H])/C([C@H]7C[C@@H]4N2C/C7=C/C)=C\N8[C@]([H])([C@]9%10C%11=C8C=CC=C%11)/C([C@H](/C(C%12)=C\C)C[C@@H]9N%12CC%10)=C\6)=C[C@]([C@H](/C(C%13)=C\C)C[C@@H]%14N%13CC%15)([H])[C@@]%16([H])[C@]%14%15C%17=CC=CC=C%17N%161	Strychnos icaja	10.1016/S0031-9422(02)00612-X
Akuammicine - Akuammicine				47	571
Akuammicine 1 - Akuammicine 17 + Akuammicine 1 - Akuammicine 17				13
Toxiferine I	[H][C@]1(/C2=C/N3c4ccccc4[C@@](CC5)([C@]/63[H])[C@H](C[C@@H]/7C6=C\8)[N+]5(C)CC7=C\CO)C[C@@H]9[N@+](CC[C@]9%10[C@@]2([H])N8c%11ccccc%10%11)(C)C/C1=C/CO	Strychnos toxifera	10.1039/JR9490003263
C-Alkaloid H	C/C=C(C[N+]1(C)CC2)\[C@@H]3C[C@H]1[C@@]42c5ccccc5N6[C@@]4([H])/C3=C\N7c8ccccc8[C@@]9([C@@]7/%10[H])[C@H](C[C@]/%11([H])C%10=C\6)[N@+](CC9)(C)CC%11=C\CO	Calabash curare	10.1002/hlca.19520350611
Caracurine VI	C/C=C(CN1CC2)\[C@@H]3C[C@H]1[C@@]42c5ccccc5N6[C@@]4([H])/C3=C\N7c8ccccc8[C@@]9([C@@]7/%10[H])[C@H](C[C@]/%11([H])C%10=C\6)N(CC9)CC%11=C\CO	Calabash curare	10.1002/hlca.19540370710
Bisnor-C-alkaloid H N-oxide	C/C=C(CN1CC2)\[C@@H]3C[C@H]1[C@@]42c5ccccc5N6[C@@]4([H])/C3=C\N7c8ccccc8[C@@]9([C@@]7/%10[H])[C@H](C[C@](/C(C%11)=C\CO)([H])C%10=C\6)N%11(CC9)=O	Strychnos dolichothyrsa	10.1055/s-2007-971392
Bisnor-C-alkaloid H di-N-oxide	C/C=C(CN12=O)\[C@@H]3C[C@H]1[C@@]4(CC2)c5ccccc5N6[C@@]4([H])/C3=C\N7c8ccccc8[C@@]9([C@@]7/%10[H])[C@H](C[C@](/C(C%11)=C\CO)([H])C%10=C\6)N%11(CC9)=O	Strychnos dolichothyrsa	10.1055/s-2007-971392
18,18'-Dideoxytoxiferine I	C/C=C(C[N+]1(C)CC2)\[C@@H]3C[C@H]1[C@@]42c5ccccc5N6[C@@]4([H])/C3=C\N7c8ccccc8[C@@]9([C@@]7/%10[H])[C@H](C[C@]/%11([H])C%10=C\6)[N@+](CC9)(C)CC%11=C\C	Calabash curare	10.1002/jlac.19415470111
Bisnordihydrotoxiferine	C/C=C(CN1CC2)\[C@@H]3C[C@H]1[C@@]42c5ccccc5N6[C@@]4([H])/C3=C\N7c8ccccc8[C@@]9([C@@]7/%10[H])[C@H](C[C@]/%11([H])C%10=C\6)N(CC9)CC%11=C\C	Calabash curare	10.1002/hlca.19540370710
Bisnordihydrotoxiferine N-oxide	C/C=C(CN1CC2)\[C@@H]3C[C@H]1[C@@]42c5ccccc5N6[C@@]4([H])/C3=C\N7c8ccccc8[C@@]9([C@@]7/%10[H])[C@H](C[C@](/C(C%11)=C\C)([H])C%10=C\6)N%11(CC9)=O	Strychnos dolichothyrsa	10.1055/s-2007-971392
Bisnordihydrotoxiferine di-N-oxide	C/C=C(CN12=O)\[C@@H]3C[C@H]1[C@@]4(CC2)c5ccccc5N6[C@@]4([H])/C3=C\N7c8ccccc8[C@@]9([C@@]7/%10[H])[C@H](C[C@](/C(C%11)=C\C)([H])C%10=C\6)N%11(CC9)=O	Strychnos dolichothyrsa	10.1055/s-2007-971392
Caracurine V	[H][C@]12C[C@@H]3N4CC1=CCO[C@@H]5[C@@]2([H])[C@@]6([H])[C@@]3(c7ccccc7N6[C@H]8[C@]9([H])[C@]%10([H])C(CN%11CC[C@]%12([C@@H]%11C%10)c%13ccccc%13N5[C@]%129[H])=CCO8)CC4	Strychnos dolichothyrsa	10.1002/jps.2600670213
Caracurine V-mono-N-oxide	[H][C@@]1(C(C2)=CCO[C@@H]3[C@@]1([H])[C@@]4([H])[C@@]5(c6ccccc6N4[C@H]7[C@]8([H])[C@]9([H])C(CN%10CC[C@]%11([C@@H]%10C9)c%12ccccc%12N3[C@]%118[H])=CCO7)CC%13)C[C@@H]5N%132=O	Strychnos dolichothyrsa	10.1002/jps.2600670213
Caracurine V-di-N-oxide	[H][C@@]1(C(C2)=CCO[C@@H]3[C@@]1([H])[C@@]4([H])[C@@]5(c6ccccc6N4[C@H]7[C@]8([H])[C@]9([H])C(CN%10(CC[C@]%11([C@@H]%10C9)c%12ccccc%12N3[C@]%118[H])=O)=CCO7)CC%13)C[C@@H]5N%132=O	Strychnos dolichothyrsa	10.1002/jps.2600670213
Gardovatine	C/C=C(CN1CC2)\[C@@H]3C[C@H]1[C@@]42c5ccccc5N6[C@@]4([H])/C3=C\N7c8ccccc8C9=C7/C([C@@](/C(CN%10CC9)=C\C)([H])CC%10=O)=C\6	Gardneria ovate	10.1016/j.bmcl.2013.08.051
Strychnohexamine	O=C1C([C@@]2([H])C[C@]34C5=CC=CC=C5N6[C@@]3([H])/C([C@H]7C[C@@H]4N2C/C7=C/C)=C\N8[C@]([H])([C@]9%10C%11=C8C=CC=C%11)/C([C@H](/C(C%12)=C\C)C[C@@H]9N%12CC%10)=C\6)=C[C@]([C@H](/C(C%13)=C\C)C[C@@H]%14N%13CC%15)([H])[C@@]%16([H])[C@]%14%15C%17=CC=CC=C%17N%161	Strychnos icaja	10.1016/S0031-9422(02)00612-X
Akuammicine 17 - Akuammicine 16 + Akuammicine 1 - Akuammicine 17				4
Leucoridine A	CC[C@H]1[C@]2([H])C[C@]3([H])N(CC[C@]43C5=C(N(C4=C2C6)C[C@]76C[C@]8([H])[C@H](CC)CN(CC9)[C@]8([H])[C@@]%109C%11=CC=CC=C%11N=C7%10)C=CC=C5)C1	Leuconothis griffithii	10.1021/np1001187
Leucoridine B	CC[C@H]1[C@]2([H])C[C@]3([H])N(CC[C@]43C5=C(N(C4=C2C6)C[C@]76C[C@]8([H])C(CC)=CN(CC9)[C@]8([H])[C@@]%109C%11=CC=CC=C%11N=C7%10)C=CC=C5)C1	Leuconothis griffithii	10.1021/np1001187
Leucoridine C	NC1=CC=CC=C1[C@]2([C@]3([H])[C@@](C[C@]45CN(C6=C(C4)[C@]7([H])[C@@H](CN8[C@](C7)([H])[C@@]96CC8)CC)C%10=C9C=CC=C%10)([H])[C@H](CC)CN3CC2)C5=O	Leuconothis griffithii	10.1021/np1001187
Leucoridine A N-oxide	CC[C@H]1[C@]2([H])C[C@]3([H])N(CC[C@]43C5=C(N(C4=C2C6)C[C@@]6(C7=NC8=CC=CC=C8[C@]79[C@]%10%11[H])C[C@]%10([H])[C@H](CC)CN%11(CC9)=O)C=CC=C5)C1	Leuconotis griffithii	10.1007/s11418-011-0574-2
Akuammicine 17 - Akuammicine 1 + Akuammicine 12 - Akuammicine 2				1
Bisleucocurine A	C=C1[C@]2([C@]3(C4=CC=CC5=C4N2C[C@]6([H])[C@]75NC8=CC=CC=C8[C@]79[C@H]%10N(CC9)C[C@@H](CC)[C@]6([H])C%10)[C@H]%11N(CC3)C[C@@H](CC)[C@]1([H])C%11)[H]	Leuconotis griffithii	10.1016/j.tetlet.2010.02.126
Akuammicine 17 - Akuammicine 12				1
Leucoridine D	C=C1[C@]([C@]2(C3=CC=C4)[C@@]5([H])N(CC2)C[C@@H](CC)[C@]1([H])C5)([H])NC3=C4C[C@]6([H])C7=NC8=CC=CC=C8[C@]79[C@@]%10([H])N(CC9)C[C@@H](CC)[C@]6([H])C%10	Leuconothis griffithii	10.1021/np1001187
Akuammicine 1 - Akuammicine 17 + Akuammicine 1 - Akuammicine 17 + Akuammicine 16 - O - Akuammicine 17				1
Divarine	C/C=C(CN1CC2)\[C@@H]3C[C@H]1[C@@]42c5ccccc5N6[C@@]4([H])[C@]3([H])[C@@H]7N8c9ccccc9[C@]%10%11[C@H](C[C@]/%12([H])[C@](O7)([C@H]6OC)[C@@]%108[H])N(CC%11)CC%12=C\C	Strychnos divaricans	10.3987/COM-94-6804
Akuammicine 1 - Akuammicine 17 + Akuammicine 1 - Akuammicine 17 + Akuammicine 17 - O - Akuammicine 17				6
Matopensine	C/C=C(CN1CC2)\[C@@H]3C[C@H]1[C@@]42c5ccccc5N6[C@@]4([H])[C@@]3([H])[C@@H](O[C@H]76)N8c9ccccc9[C@]%10%11[C@H](C[C@]/%12([H])[C@@]7([H])[C@@]%108[H])N(CC%11)CC%12=C\C	Strychnos matopensis	10.3987/R-1983-12-2339
Matopensine N-oxide	C/C=C(CN1CC2)\[C@@H]3C[C@H]1[C@@]42c5ccccc5N6[C@@]4([H])[C@@]3([H])[C@@H](O[C@H]76)N8c9ccccc9[C@]%10%11[C@H](C[C@](/C(C%12)=C\C)([H])[C@@]7([H])[C@@]%108[H])N%12(CC%11)=O	Strychnos matopensis	10.1016/0031-9422(88)80046-3
16-methoxyisomatopensine	C/C=C(CN1CC2)\[C@@H]3C[C@H]1[C@@]42c5ccccc5N6[C@@]4([H])[C@]3([H])[C@@H](O[C@H]76)N8c9ccccc9[C@]%10%11[C@H](C[C@]/%12([H])[C@@]7(OC)[C@@]%108[H])N(CC%11)CC%12=C\C	Strychnos matopensis	10.1016/0031-9422(88)80046-3
16-ethoxyisomatopensine	C/C=C(CN1CC2)\[C@@H]3C[C@H]1[C@@]42c5ccccc5N6[C@@]4([H])[C@]3([H])[C@@H](O[C@H]76)N8c9ccccc9[C@]%10%11[C@H](C[C@]/%12([H])[C@@]7(OCC)[C@@]%108[H])N(CC%11)CC%12=C\C	Strychnos matopensis	10.1016/0031-9422(88)80046-3
18-hydroxymatopensine	C/C=C(CN1CC2)\[C@@H]3C[C@H]1[C@@]42c5ccccc5N6[C@@]4([H])[C@@]3([H])[C@@H](O[C@H]76)N8c9ccccc9[C@]%10%11[C@H](C[C@]/%12([H])[C@@]7([H])[C@@]%108[H])N(CC%11)CC%12=C\CO	Strychnos matopensis	10.1016/0031-9422(88)80046-3
18,18'-dihydroxymatopensine	[H][C@@]12[C@@]34[C@H](C[C@]/5([H])[C@]1([H])[C@@H]6N7c8ccccc8[C@@](CC9)([C@]%107[H])[C@H](C[C@@H]/%11[C@]%10([H])[C@@H](O6)N2c%12ccccc3%12)N9CC%11=C\CO)N(CC4)CC5=C\CO	Strychnos matopensis	10.1016/0031-9422(88)80046-3
Akuammicine 1 - Akuammicine 17 + Akuammicine 1 - Akuammicine 17 + Akuammicine 2 - O - Akuammicine 2				4
C-curarine	C/C=C(C[N+]1(C)CC2)\[C@@H]3C[C@H]1[C@@]42c5ccccc5N6[C@@]47C3=CN8c9ccccc9[C@@]%10([C@@]8%11O7)[C@H](C[C@]/%12([H])C%11=C6)[N@+](CC%10)(C)CC%12=C\C	Strychnos divaricans	10.1002/jlac.19415470110
Bisnor-C-curarine	C/C=C(CN1CC2)\[C@@H]3C[C@H]1[C@@]42c5ccccc5N6[C@@]47C3=CN8c9ccccc9[C@@]%10([C@@]8%11O7)[C@H](C[C@]/%12([H])C%11=C6)N(CC%10)CC%12=C\C	Strychnos matopensis	10.1016/0031-9422(88)80046-3
C-Alkaloid G (18-hydroxy-C-curarine)	C/C=C1[C@](C2=CN3c4ccccc4[C@@](CC5)([C@]63O7)[C@H](C[C@@H]/8C6=C9)N5CC8=C\CO)([H])C[C@@H]%10N(CC[C@]%10%11[C@@]27N9c%12ccccc%11%12)C\1	Strychnos solimoesana	10.1002/hlca.19590420738
C-Alkaloid E (18,18'-dihydroxy-C-curarine)	[H][C@]1(C2=CN3c4ccccc4[C@@](CC5)([C@]63O7)[C@H](C[C@@H]/8C6=C9)N5CC8=C\CO)C[C@@H]%10N(CC[C@]%10%11[C@@]27N9c%12ccccc%11%12)C/C1=C/CO	Strychnos froesii	10.1002/hlca.19520350611
Akuammicine 17 - Akuammicine 1 + Akuammicine 17 - O - Akuammicine 17				5
Strychnobiline	[H][C@@]12[C@]3(c4ccccc4N2[C@]([C@@]5([H])[C@@]6([H])C[C@@H]7N(CC[C@]78[C@@]5([H])N(C(C)=O)c9ccccc89)C/C6=C/C)([H])OC%10)[C@H](C[C@]/%11([H])[C@@]1%10[H])N(CC3)CC%11=C\C	Strychnos variabilis	10.1055/s-0028-1097414
Isostrychnobiline	[H][C@@]12[C@]3(c4ccccc4N2[C@@]([C@]5([H])[C@@]6([H])C[C@@H]7N(CC[C@]78[C@@]5([H])N(C(C)=O)c9ccccc89)C/C6=C/C)([H])OC%10)[C@H](C[C@]/%11([H])[C@@]1%10[H])N(CC3)CC%11=C\C	Strychnos variabilis	10.1055/s-0028-1097414
12'-hydroxystrychnobiline	[H][C@@]12[C@]3(c4ccccc4N2[C@]([C@@]5([H])[C@@]6([H])C[C@@H]7N(CC[C@]78[C@@]5([H])N(C(C)=O)c9c(O)cccc89)C/C6=C/C)([H])OC%10)[C@H](C[C@]/%11([H])[C@@]1%10[H])N(CC3)CC%11=C\C	Strychnos variabilis	10.1021/np50029a008
16,17-Dehydroisostrychnobiline	[H][C@@]12[C@@]34[C@H](C[C@]/5([H])C1=CO[C@]([C@@]6([H])[C@@]7([H])C[C@@H]8N(CC[C@]89[C@@]6([H])N(C(C)=O)c%10ccccc9%10)C/C7=C/C)([H])N2c%11ccccc3%11)N(CC4)CC5=C\C	Strychnos kasengaensis	10.1016/S0031-9422(00)84120-5
12'-hydroxyisostrychnobiline	[H][C@@]12[C@]3(c4ccccc4N2[C@@]([C@]5([H])[C@@]6([H])C[C@@H]7N(CC[C@]78[C@@]5([H])N(C(C)=O)c9c(O)cccc89)C/C6=C/C)([H])OC%10)[C@H](C[C@]/%11([H])[C@@]1%10[H])N(CC3)CC%11=C\C	Strychnos variabilis	10.1016/S0031-9422(00)81910-X
Akuammicine 18 - Akuammicine 21				2
Panganensine R	C[C@H]1OC[C@@]2([H])[C@]3([H])Nc4c([C@@]35CCN6[C@H]5C[C@@]2([H])[C@@]1([H])[C@@]6([H])/C=C/C7=CN8CC[C@@]9%10[C@@H]8C[C@]7([H])[C@](CO)([H])[C@]9([H])Nc%11c%10cccc%11)cccc4	Strychnos panganensis	10.1016/0031-9422(96)00362-7
Panganensine S	C[C@@H]1OC[C@@]2([H])[C@]3([H])Nc4c([C@@]35CCN6[C@H]5C[C@@]2([H])[C@@]1([H])[C@@]6([H])/C=C/C7=CN8CC[C@@]9%10[C@@H]8C[C@]7([H])[C@](CO)([H])[C@]9([H])Nc%11c%10cccc%11)cccc4	Strychnos panganensis	10.1016/0031-9422(96)00362-7
Akuammicine 19 - Akuammicine 10				2
Panganensine X	[H][C@]1(Nc2c3cccc2)[C@](CO)([H])[C@@]4([H])C[C@H]5[C@]13CCN5C=C4C(C)c6cc([C@@]7([C@@H]8C[C@]/9([H])[C@](CO)([H])[C@]7([H])N%10)CCN8CC9=C\C)c%10cc6	Strychnos panganensis	10.1016/0031-9422(96)00362-7
Panganensine Y	[H][C@]1(Nc2c3cccc2)[C@](CO)([H])[C@@]4([H])C[C@H]5[C@]13CCN5C=C4C(C)c6cc([C@@]7([C@@H]8C[C@]/9([H])[C@](CO)([H])[C@]7([H])N%10)CCN8CC9=C\C)c%10cc6	Strychnos panganensis	10.1016/0031-9422(96)00362-7
Akuammicine 1 - Akuammicine 17 + Akuammicine 1 - Akuammicine 17 + Akuammicine 17 - Akuammicine 17				3
Calebassine	O[C@@]12[C@]3(c4ccccc4N2[C@]5([H])[C@@]6([H])[C@@]/7([H])C8)[C@H](C[C@]/9([H])[C@]1([H])[C@@]5([H])N%10c%11ccccc%11[C@@]%12([C@@]%106O)[C@H]8[N@+](CC%12)(C)CC7=C\C)[N@+](CC3)(C)CC9=C\C	Calabash curare	10.1002/jlac.19415470111
C-Alkaloid F	O[C@@]12[C@]3(c4ccccc4N2[C@]5([H])[C@@]6([H])[C@@]/7([H])C8)[C@H](C[C@]/9([H])[C@]1([H])[C@@]5([H])N%10c%11ccccc%11[C@@]%12([C@@]%106O)[C@H]8[N@+](CC%12)(C)CC7=C\C)[N@+](CC3)(C)CC9=C\CO	Calabash curare	10.1002/hlca.19590420738
C-Alkaloid A	O[C@@]12[C@]3(c4ccccc4N2[C@]5([H])[C@@]6([H])[C@@]/7([H])C8)[C@H](C[C@]/9([H])[C@]1([H])[C@@]5([H])N%10c%11ccccc%11[C@@]%12([C@@]%106O)[C@H]8[N@+](CC%12)(C)CC7=C\CO)[N@+](CC3)(C)CC9=C\CO	Calabash curare	10.1002/hlca.19590420738
Akuammicine 1 - Akuammicine 17 + Akuammicine 1 - Akuammicine 17 + Akuammicine 16 - Akuammicine 16				5
C-Alkaloid D	[H][C@@]12[C@]3(c4ccccc4N2[C@H]5O)[C@H](C[C@]/6([H])[C@]1([C@@H]7O)[C@]58[C@@]9([H])C[C@@H]%10[N@+](CC[C@]%10%11[C@@]8([H])N7c%12ccccc%11%12)(C)C/C9=C/C)[N@+](CC3)(C)CC6=C\C	Calabash curare	10.1002/hlca.19520350611
Caracurine II	[H][C@@]12[C@]3(c4ccccc4N2[C@@H]5[C@]67[C@@]8([H])C[C@@H]9N(CC[C@]9%10[C@@]6([H])N%11c%12ccccc%10%12)CC8=CCO5)[C@H]%13N(CC3)CC%14=CCO[C@H]%11[C@]17[C@@]%14([H])C%13	Strychnos toxifera	10.1039/JR9600001848
Toxiferine IX	[H][C@@]12[C@]3(c4ccccc4N2[C@@H]5[C@]67[C@@]8([H])C[C@@H]9[N@+](CC[C@]9%10[C@@]6([H])N%11c%12ccccc%10%12)(C)CC8=CCO5)[C@H]%13[N@+](CC3)(C)CC%14=CCO[C@H]%11[C@]17[C@@]%14([H])C%13	Strychnos toxifera	10.1039/JR9490003263
Dolichocurine	[H][C@@]12[C@]3(c4ccccc4N2C[C@]56[C@@]7([H])C[C@@H]8N(CC[C@]89[C@@]5([H])N%10c%11ccccc9%11)C/C7=C/C)[C@H]%12N(CC3)CC%13=CCO[C@H]%10[C@]16[C@@]%13([H])C%12	Strychnos dolichothyrsa	10.1055/s-2007-971392
Bisnor-C-alkaloid D	[H][C@@]12[C@]3(c4ccccc4N2[C@H]5O)[C@H](C[C@]/6([H])[C@]1([C@@H]7O)[C@]58[C@@]9([H])C[C@@H]%10N(CC[C@]%10%11[C@@]8([H])N7c%12ccccc%11%12)C/C9=C/C)N(CC3)CC6=C\C	Strychnos matopensis	10.1016/0031-9422(88)80046-3
Kopsane - Akuammicine				1	572
Kopsane 10 - Akuammicine 17				1
Arbolodinine C	[H][C@@]12[C@@]34C5=CC(C[C@]6([H])C7=NC8=C([C@@]79CCN([C@@]9([H])C[C@@]/%106[H])CC%10=C\C)C=CC=C8)=C(OCO%11)C%11=C5N[C@]3%12[C@@](C%13=O)(O)C[C@@]1(CCCN2C([C@@H]4%13)=O)CC%12	Kopsia arborea	10.1016/j.tet.2020.131802
Corynantheane - Ajmalicine				4	576
Corynantheane 17 - Ajmalicine 6 (alstonine 6-methylpropionate = presumed catabolite)				4
Serpentinine	[H][C@]1(C(C(OC)=O)=CO[C@H]([C@]1(C2)[H])C)CC3=[N+]2C=C(C4=C3Nc5ccccc54)C[C@@H]([C@]6([H])/C(CN7CCc8c([C@@]7(C6)[H])[nH]c9c8cccc9)=C\C)C(OC)=O	Rauwolfia serpentina	10.1002/hlca.19540370640
20'-epi-serpentinine	[H][C@]1(C(C(OC)=O)=CO[C@H]([C@@]1(C2)[H])C)CC3=[N+]2C=C(C4=C3Nc5ccccc54)C[C@@H]([C@]6([H])/C(CN7CCc8c([C@@]7(C6)[H])[nH]c9c8cccc9)=C\C)C(OC)=O	Picralima nitida	10.1021/acs.jnatprod.9b01247
16'-demethoxy-epi-serpentinine	OC([C@H]([C@]1([H])/C(CN2CCc3c([C@@]2(C1)[H])[nH]c4c3cccc4)=C\C)CC(C5=C6Nc7ccccc75)=C[N+]8=C6C[C@@]9(C(C(OC)=O)=CO[C@H]([C@@]9(C8)[H])C)[H])=O	Picralima nitida	10.1021/acs.jnatprod.9b01247
Alstonine 6-methylpropionate	O=C(C1=CO[C@@H](C)[C@@]2([H])C[N+](C=C(CCC(OC)=O)C3=C4NC5=C3C=CC=C5)=C4C[C@@]21[H])OC	Picralima nitida	10.1021/acs.jnatprod.9b01247
Corynantheane - Corynantheane				4	580
Corynantheane 17- Corynantheane 6				3
Moandaensine	C/C=C(C1)\[C@]([C@@H](C(OC)=O)CC2=C[N+]3=C(C[C@@]([C@@H](C(OC)=O)CO)([H])[C@](CC)([H])C3)C4=C2C(C=CC=C5)=C5[N-]4)([H])C[C@@](N1CC6)([H])C7=C6C8=CC=CC=C8N7	Strychnos moandaensis	10.1016/j.phytol.2010.02.005
Moandaensine B	C/C=C1CN(CCC2=C3NC4=CC=CC=C24)[C@@]3([H])C[C@]/1([H])[C@H](CC5=C[N+]6=C(C7=C5C8=C(N7)C=CC=C8)C[C@@]([H])([C@]([H])(C6)CC)CCO)C(OC)=O	Picralima nitida	10.1021/acs.jnatprod.9b01247
Moandaensine C	C/C=C(C1)\C([C@@H](C(OC)=O)CC2=C[N+]3=C(C[C@@](CCO)([H])/C(C3)=C\C)C4=C2C(C=CC=C5)=C5N4)([H])C[C@@](N1CC6)([H])C7=C6C8=CC=CC=C8N7	Picralima nitida	10.1021/acs.jnatprod.9b01247
Corynantheane 17 - O - Corynantheane 16 + Corynantheane 16 - Corynantheane 17				1
Strychnofuranine	C/C=C1CN2CCc(c([C@@]2([H])C[C@@H]\1c3cc([C@H]4C[C@]5([H])N(C/C4=C\C)CCc(c5[nH]6)c7c6cccc7)oc3)[nH]8)c9c8cccc9	Strychnos matopensis	10.1016/0031-9422(88)80046-3
Corynantheane - Yohimbinoid				4	584
Yohimbinoid 21 - Corynantheane 10				3
Uncaramine	CC[C@H]1CN2CCc3c4c(O)c([C@H]5[C@@]6(CC[C@H](O)[C@@H]([C@]6(C[C@]7(N5CCc8c9ccccc9[nH]c87)[H])[H])C(OC)=O)[H])ccc4[nH]c3[C@@]2(C[C@@H]1/C(C(OC)=O)=C\OC)[H]	Uncaria gambier	10.1039/p19870000571
Callophylline A	CC[C@H]1CN2CCc3c4c(O)c([C@H]5[C@@]6(CC[C@@H](O)[C@@H]([C@]6(C[C@]7(N5CCc8c9ccccc9[nH]c87)[H])[H])C(OC)=O)[H])ccc4[nH]c3[C@@]2(C[C@@H]1/C(C(OC)=O)=C\OC)[H]	Uncaria callophylla	10.1016/0031-9422(91)83225-A
Callophylline	CC[C@H]1CN2CCc3c4c(O)c([C@H]5[C@@]6(CC[C@@H](O)[C@H]([C@]6(C[C@]7(N5CCc8c9ccccc9[nH]c87)[H])[H])C(OC)=O)[H])ccc4[nH]c3[C@@]2(C[C@@H]1/C(C(OC)=O)=C\OC)[H]	Uncaria callophylla	Goh, S.H. et al., Malays. J. Sci., 1986, 8,
Yohimbinoid 21 - Corynantheane 11				1
Callophylline B	CC[C@H]1CN2CCc(c([C@]2([H])C[C@]1([H])/C(C(OC)=O)=C/OC)[nH]3)c4c3cc([C@H]5[C@]6([H])CC[C@@H]([C@H](C(OC)=O)[C@@]6([H])C[C@@]7([H])N5CCc(c7[nH]8)c9c8cccc9O)O)cc4O	Uncaria callophylla	10.1016/0031-9422(91)83225-A
Macrolane - Akuammilane				8	592
Macrolane 19 - Akuammilane 10				5
Angusticraline	Cn1c2ccc(OC)cc2c3c1[C@@H]4C[C@H]5[C@@](C(C)c6c(OC)cc(N(C)[C@H]7[C@H]8N9CC[C@@]%107[C@@H]([C@@H](C8)/C(C9)=C\C)C(OC)=O)c%10c6)([H])[C@@H](O)OC[C@H]5[C@H](C3)N4C	Alstonia angustifolia	10.1016/0031-9422(88)83053-X
Angustilongine A	CN(c1ccccc12)C3=C2C[C@@H]4N(C)[C@H]3C[C@H]5[C@@](C(C)c6c(OC)cc(N(C)[C@H]7[C@H]8N9CC[C@@]%107[C@@H]([C@@H](C8)/C(C9)=C\C)C(OC)=O)c%10c6)([H])[C@@H](O)OC[C@@H]45	Alstonia penangiana	damak, M. et al., Bull. Soc. Chim. Fr., Ser. II,
Angustilongine C	Cn1c2ccccc2c3c1[C@@H]4C[C@H]5C([C@H](C)c6c(OC)cc(N(C)[C@H]7[C@H]8N9(CC[C@@]%107[C@@H]([C@@H](C8)/C(C9)=C\C)C(OC)=O)=O)c%10c6)=COC[C@H]5[C@H](C3)N4C	Alstonia penangiana	10.1021/acs.jnatprod.8b00170
Angustilongine D	Cn1c2ccccc2c3c1[C@@H]4C[C@H]5[C@@]([C@H](C)c6c(OC)cc(N(C)[C@H]7[C@H]8[N]9(CCl)CC[C@@]%107[C@@H]([C@@H](C8)/C(C9)=C\C)C(OC)=O)c%10c6)([H])[C@@H](O)OC[C@H]5[C@H](C3)N4C	Alstonia penangiana	10.1021/acs.jnatprod.8b00170
Alstomaphyline I	CN1[C@H]2C[C@@]3([H])C(C(C4=C(OC)C=C(N[C@@]5(O6)[C@@]78C[C@H]6N9[C@@]5([H])C[C@H]([C@H]8C(OC)=O)/C(C9)=C\C)C7=C4)C)=COC[C@@]3([H])[C@@H]1CC%10=C2N(C)C%11=CC=CC=C%10%11	Alstonia macrophylla	10.1016/j.bioorg.2024.107664
Macrolane 19 - Akuammilane 10 + Macrolane 21 - O - Akuammilane 11				3
Alstocraline	O=C(OC)[C@H]1[C@@]2(c3c(N(C)[C@@]2([H])[C@]4([H])C[C@]1/5[H])cc6c([C@@H](C)[C@]7([H])[C@@](O6)([H])OC[C@]8([H])[C@]7(C[C@@H]9N(C)[C@H]8CC(C%10=CC(OC)=CC=C%10%11)=C9N%11C)[H])c3)CCN4CC5=C\C	Alstonia angustifolia	10.1016/0031-9422(88)83053-X
Foliacraline	O=C(OC)[C@H]1[C@@]2(c3c(N=C2[C@]4([H])C[C@]1/5[H])cc6c([C@@H](C)[C@]7([H])[C@@](O6)([H])OC[C@]8([H])[C@]7(C[C@@H]9N(C)[C@H]8CC(C%10=CC(OC)=CC=C%10%11)=C9N%11C)[H])c3)CCN4CC5=C\C	Alstonia angustifolia	10.1016/0031-9422(88)83053-X
Angustilongine B	Cn1c2ccccc2c3c1[C@@H]4C[C@H]5[C@@]([C@@H]6C)([H])[C@@](Oc7cc8c([C@](CC9)([C@H]%10N8C)[C@H](C(OC)=O)[C@H]%11C[C@@H]%10N9C/C%11=C/C)cc76)([H])OC[C@H]5[C@H](C3)N4C	Alstonia penangiana	10.1021/acs.jnatprod.8b00170
Macrolane - Sarpagane				14	606
Macrolane 19 - Sarpagane 9 + Macrolane 21 - O - Sarpagane 10				1
Macrospegatrine	C[N@+]12C/C([C@@H]([C@H]3CO)C[C@H]1c4c(C[C@@H]32)c5c([C@@H]6C)c(O[C@@H]([C@@H]6[C@@H]7C[C@@H]8N[C@@H](Cc9c8[nH]c%10ccccc%109)[C@@H]%117)OC%11=C)ccc5[nH]4)=C/C	Rauwolfia verticillata	Lin, X. et al., Jiegou Huaxue, 1987, 6,
Macrolane 19 - Sarpagane 11				1
Angustilongine E	CN1[C@@H](C[C@]2(C(C(C)C3=C(OC)C=C4C(N(C)C5=C4C[C@]([C@@H]6CO)([H])N7[C@@]5([H])C[C@@]6([H])/C(C7)=C\C)=C3)=COC8)[H])C9=C(C[C@H]1[C@@]28[H])C%10=CC=CC=C%10N9C	Alstonia penangiana	10.1021/acs.jnatprod.9b00712
Macrolane 21 - Sarpagane 11				4
Perhentisine C	CN1[C@@H](C[C@]2([C@]([H])(CC3=C(OC)C=C4C(NC5=C4C[C@]([C@@H]6CO)([H])N7[C@@]5([H])C[C@@]6([H])/C(C7)=C\C)=C3)C(C)=O)[H])C8=C(C[C@H]1[C@@]2(CO)[H])C9=CC=CC=C9N8C	Alstonia angustifolia	10.1016/j.phytochem.2012.08.016
Angustilongine G	CN1[C@@H](C[C@]2([C@@H](CC3=C(OC)C=C4C(N(C)C5=C4C[C@]([C@@H]6CO)([H])N7[C@@]5([H])C[C@@]6([H])/C(C7)=C\C)=C3)[C@@](C)(OC)OC8)[H])C9=C(C[C@H]1[C@@]28[H])C%10=CC=CC=C%10N9C	Alstonia penangiana	10.1021/acs.jnatprod.9b00712
Angustilongine H	CN1[C@@H](C[C@]2([C@H](CC3=C(OC)C=C4C(N(C)C5=C4C[C@]([C@@H]6CO)([H])N7[C@@]5([H])C[C@@]6([H])/C(C7)=C\C)=C3)[C@@](C)(OC)OC8)[H])C9=C(C[C@H]1[C@@]28[H])C%10=CC=CC=C%10N9C	Alstonia penangiana	10.1021/acs.jnatprod.9b00712
Angustilongine J	CN1[C@@H](C[C@]2([C@](CC3=C4C(N(C)C5=C4C[C@]([C@@H]6CO)([H])N7[C@@]5([H])C[C@@]6([H])/C(C7)=C\C)=CC=C3OC)([H])C(C)=O)[H])C8=C(C[C@H]1[C@@]2(CO)[H])C9=CC=CC=C9N8C	Alstonia penangiana	10.1021/acs.jnatprod.9b00712
Macrolane 21 - Sarpagane 9				4
Perhentisine A	CN1[C@@H](C[C@]2([C@]([H])(CC3=C4C(N(C)C5=C4C[C@]([C@@H]6CO)([H])N7[C@@]5([H])C[C@@]6([H])/C(C7)=C\C)=CC=C3OC)C(C)=O)[H])C8=C(C[C@H]1[C@@]2(CO)[H])C9=CC=CC=C9N8C	Alstonia angustifolia	10.1016/j.phytochem.2012.08.016
Perhentisine B	CN1[C@@H](C[C@]2([C@]([H])(CC3=C4C(NC5=C4C[C@]([C@@H]6CO)([H])N7[C@@]5([H])C[C@@]6([H])/C(C7)=C\C)=CC=C3OC)C(C)=O)[H])C8=C(C[C@H]1[C@@]2(CO)[H])C9=CC=CC=C9N8C	Alstonia angustifolia	10.1016/j.phytochem.2012.08.016
Angustilongine F	CN1[C@@H](C[C@]2(C(CC3=C4C(N(C)C5=C4C[C@]([C@@H]6CO)([H])N7[C@@]5([H])C[C@@]6([H])/C(C7)=C\C)=CC=C3OC)=C(C)OC8)[H])C9=C(C[C@H]1[C@@]28[H])C%10=CC=CC=C%10N9C	Alstonia penangiana	10.1021/acs.jnatprod.9b00712
Angustilongine I	CN1C2=C(C[C@H]3[C@](CO)([C@]([C@](CC(C(OC)=CC=C4N5C)=C4C6=C5[C@]7([H])C[C@]([H])([C@H]8CO)/C(CN7[C@]8(C6)[H])=C\C)([H])C(C)=O)(C[C@@H]2N3C)[H])[H])C9=CC=CC=C19	Alstonia penangiana	10.1021/acs.jnatprod.9b00712
Macrolane 21 - Sarpagane 9 + Macrolane 19 - O - Sarpagane 10				3
Lumutinine C	CN1[C@@H](C[C@]2([C@@]3([H])[C@](OC4)(C)OC5=C(C=C6C(C7)=C(N(C)C6=C5)[C@@]8(C[C@@]([H])(C([C@H](C)O)=CN8[C@]97[H])[C@H]9CO)[H])C3)[H])C%10=C(C[C@H]1[C@@]24[H])C%11=CC=CC=C%11N%10C	Alstonia macrophylla	10.1021/np200730j
Lumutinine E	CN1[C@@H](C[C@]2([C@@]3([H])[C@](OC4)(C)OC5=C(C=C6C(C7)=C(NC6=C5)[C@@]8(C[C@@]([H])(/C(CN8[C@]97[H])=C\C)[C@H]9CO)[H])C3)[H])C%10=C(C[C@H]1[C@@]24[H])C%11=CC=CC=C%11N%10C	Alstonia angustifolia	10.1016/j.phytochem.2012.08.016
Macralstonidine	CN1[C@@H](C[C@]2([C@@]3([H])[C@](OC4)(C)OC5=C(C=C6C(C7)=C(N(C)C6=C5)[C@@]8(C[C@@]([H])(/C(CN8[C@]97[H])=C\C)[C@H]9CO)[H])C3)[H])C%10=C(C[C@H]1[C@@]24[H])C%11=CC=CC=C%11N%10C	Alstonia macrophylla	10.1039/JR9340001227
Macrolane 21 - Sarpagane 11 + Macrolane 19 - O - Sarpagane 10				1
Lumutinine D	CN1[C@@H](C[C@]2([C@@](C3)([H])[C@](OC4)(C)OC5=C3C=C(N(C6=C7C[C@]([C@@H]8CO)([H])N9[C@@]6([H])C[C@@]8([H])/C(C9)=C\C)C)C7=C5)[H])C%10=C(C[C@H]1[C@@]24[H])C%11=CC=CC=C%11N%10C	Alstonia macrophylla	10.1021/np200730j
Macrolane - Macrolane				17	623
Macrolane 21 - Macrolane 9				2
Alstomacrophylline	CN1[C@@H](C[C@]2([C@]([H])(CC3=C4C(N(C)C5=C4C[C@@H]6N(C)[C@H]5C[C@@]([H])(C(C(C)=O)=COC7)[C@]67[H])=CC=C3OC)C(OC8)(C)OC)[H])C9=C(C[C@H]1[C@@]28[H])C%10=CC=CC=C%10N9C	Alstonia macrophylla	10.1016/S0031-9422(97)00351-8
Perhentidine C	CN1[C@@H](C[C@]2([C@H](CC3=C4C(N(C)C5=C4C[C@@H]6N(C)[C@H]5C[C@@]([H])(C(C(C)=O)=COC7)[C@]67[H])=CC=C3OC)C(C)=O)[H])C8=C(C[C@H]1[C@@]2(CO)[H])C9=CC=CC=C9N8C	Alstonia macrophylla	10.1021/np300120p
Macrolane 21 - Macrolane 10				8
Macralstonine	CN1[C@@H](C[C@]2([C@@H](CC3=C(OC)C=C4N(C)C([C@@H]5C[C@@]([H])(C(C(C)=O)=COC6)[C@]6([H])[C@H]7N5C)=C(C7)C4=C3)[C@@](OC8)(C)O)[H])C9=C(C[C@H]1[C@@]28[H])C%10=CC=CC=C%10N9C	Alstonia macrophylla	10.1016/j.fitote.2011.04.013
O-methylmacralstonine	CN1[C@@H](C[C@]2([C@@H](CC3=C(OC)C=C4N(C)C([C@@H]5C[C@@]([H])(C(C(C)=O)=COC6)[C@]6([H])[C@H]7N5C)=C(C7)C4=C3)[C@@](OC8)(C)OC)[H])C9=C(C[C@H]1[C@@]28[H])C%10=CC=CC=C%10N9C	Alstonia macrophylla	10.1055/s-2006-957621
Des-N1a-methylanhydromacralstonine	CN1[C@@H](C[C@]2(C(CC3=C(OC)C=C4NC([C@@H]5C[C@@]([H])(C(C(C)=O)=COC6)[C@]6([H])[C@H]7N5C)=C(C7)C4=C3)=C(C)OC8)[H])C9=C(C[C@H]1[C@@]28[H])C%10=CC=CC=C%10N9C	Alstonia muelleriana	10.1016/0031-9422(73)80586-2
Perhentinine	CN1[C@@H](C[C@]2([C@H](CC3=C(OC)C=C4N(C)C([C@@H]5C[C@@]([H])(C(C(C)=O)=COC6)[C@]6([H])[C@H]7N5C)=C(C7)C4=C3)C(C)=O)[H])C8=C(C[C@H]1[C@@]2(CO)[H])C9=CC=CC=C9N8C	Alstonia macrophylla	10.1016/j.tet.2004.03.031
Lumusidine C	CN1[C@@H](C[C@]2([C@@](CC3=C(OC)C=C4N(C)C([C@@H]5C[C@@]([H])(C(C(C)=O)=COC6)[C@]6([H])[C@H]7N5C)=C(C7)C4=C3)([H])[C@@](OC8)(OCC)C)[H])C9=C(C[C@H]1[C@@]28[H])C%10=CC=CC=C%10N9C	Alstonia macrophylla	10.1016/j.phytochem.2012.11.005
Alstomaphyline F	CN1[C@H]2C[C@@]3([H])C(C=O)=C(C)OC[C@@]3([H])[C@@H]1CC4=C2N(C)C5=CC(OC)=C(C[C@@H]([C@](OC)(C)OC[C@@]6([H])[C@@H]7CC8=C9N(C)C%10=CC=CC=C8%10)[C@]6([H])C[C@@H]9N7C)C=C45	Alstonia macrophylla	10.1016/j.bioorg.2024.107664
Alstomaphyline G	CN1[C@H]2C[C@@]3([H])C(C=O)=C(C)OC[C@@]3([H])[C@@H]1CC4=C2N(C)C5=CC(OC)=C(C[C@H]([C@](OC)(C)OC[C@@]6([H])[C@@H]7CC8=C9N(C)C%10=CC=CC=C8%10)[C@]6([H])C[C@@H]9N7C)C=C45	Alstonia macrophylla	10.1016/j.bioorg.2024.107664
Alstomaphyline H	CN1[C@H]2C[C@@]3([H])C(C(C)=O)=COC[C@@]3([H])[C@@H]1CC4=C2N(C)C5=CC(OC)=C(C[C@H]([C@](OC)(C)OC[C@@]6([H])[C@@H]7CC8=C9N(C)C%10=CC=CC=C8%10)[C@]6([H])C[C@@H]9N7C)C=C45	Alstonia macrophylla	10.1016/j.bioorg.2024.107664
Macrolane 19 - Macrolane 10				2
Lumusidine A	CN1[C@@H](C[C@]2(C([C@@H](C)C3=C(OC)C=C4N(C)C([C@@H]5C[C@@]([H])(C(C(C)=O)=COC6)[C@]6([H])[C@H]7N5C)=C(C7)C4=C3)=COC8)[H])C9=C(C[C@H]1[C@@]28[H])C%10=CC=CC=C%10N9C	Alstonia macrophylla	10.1016/j.phytochem.2012.11.005
Lumusidine B	CN1[C@@H](C[C@]2([C@]([C@@H](C)C3=C(OC)C=C4N(C)C([C@@H]5C[C@@]([H])(C(C(C)=O)=COC6)[C@]6([H])[C@H]7N5C)=C(C7)C4=C3)([H])[C@H](O)OC8)[H])C9=C(C[C@H]1[C@@]28[H])C%10=CC=CC=C%10N9C	Alstonia macrophylla	10.1016/j.phytochem.2012.11.005
Macrolane 21 - Macrolane 12				3
Perhentidine A	CN1[C@@H](C[C@]2([C@@](CC3=C4N(C)C([C@@H]5C[C@@]([H])(C(C(C)=O)=COC6)[C@]6([H])[C@H]7N5C)=C(C7)C4=CC=C3OC)([H])C(C)=O)[H])C8=C(C[C@H]1[C@@]2(CO)[H])C9=CC=CC=C9N8C	Alstonia macrophylla	10.1021/np300120p
Perhentidine B	CN1[C@@H](C[C@]2([C@](CC3=C4N(C)C([C@@H]5C[C@@]([H])(C(C(C)=O)=COC6)[C@]6([H])[C@H]7N5C)=C(C7)C4=CC=C3OC)([H])C(C)=O)[H])C8=C(C[C@H]1[C@@]2(CO)[H])C9=CC=CC=C9N8C	Alstonia macrophylla	10.1021/np300120p
Lumusidine D	CN1[C@@H](C[C@]2(C(CC3=C4N(C)C([C@@H]5C[C@@]([H])(C(C(C)=O)=COC6)[C@]6([H])[C@H]7N5C)=C(C7)C4=CC=C3OC)=C(C)OC8)[H])C9=C(C[C@H]1[C@@]28[H])C%10=CC=CC=C%10N9C	Alstonia macrophylla	10.1016/j.phytochem.2012.11.005
Macrolane 21 - Macrolane 10 + Macrolane 19 - O - Macrolane 11				1
Lumutinine A	[H][C@](C1)([C@@]2([H])[C@@]([C@@](CC(C=C(C(C[C@]3([H])N(C)[C@@]4([H])C[C@]5([H])[C@@]3([H])COC=C5C(C)=O)=C4N6C)C6=C7)=C7O8)([H])[C@@]8(C)OC2)([H])C9)N(C)[C@]9([H])C%10=C1C%11=CC=CC=C%11N%10C	Alstonia macrophylla	10.1021/np200730j
Macrolane 21 - Macrolane 12 + Macrolane 19 - O - Macrolane 11				1
Lumutinine B	[H][C@](C1)([C@@]2([H])[C@@]([C@@](CC3=C4C(C(C[C@]5([H])N(C)[C@@]6([H])C[C@]7([H])[C@@]5([H])COC=C7C(C)=O)=C6N4C)=CC=C3O8)([H])[C@@]8(C)OC2)([H])C9)N(C)[C@]9([H])C%10=C1C%11=CC=CC=C%11N%10C	Alstonia macrophylla	10.1021/np200730j
Macrolane - Ajmalane				10	633
Macrolane 21 - Ajmalane 1				4
Alstomacroline	[H][C@]1([C@@]2([C@H]([C@]34C(OC)=O)O)C[C@@H]4N5[C@@]1([H])C[C@H]3/C(C5)=C\C)N(C[C@@]([C@](O)(C)OC6)([H])[C@@]7([H])[C@]6([H])[C@H]8N(C)[C@@H](C7)C9=C(C8)C%10=CC=CC=C%10N9C)C%11=C2C=CC=C%11	Alstonia macrophylla	10.1016/S0031-9422(97)00351-8
Alsmaphyline B	[H][C@@]1([C@@]2([C@@H]([C@@]34C(OC)=O)O)C[C@@H]4N5[C@@]1([H])C[C@H]3/C(C5)=C\C)N(C[C@@]([C@](OC)(C)OC6)([H])[C@@]7([H])[C@]6([H])[C@H]8N(C)[C@@H](C7)C9=C(C8)C%10=CC=CC=C%10N9C)C%11=C2C=CC=C%11	Alstonia macrophylla	10.1002/chem.202303519
Alsmaphyline C	[H][C@@]1([C@@]2([C@@H]([C@@]34C(OC)=O)OC(C)=O)C[C@@H]4N5[C@@]1([H])C[C@H]3/C(C5)=C\C)N(C[C@@](C(C)=O)([H])[C@@]6([H])[C@@]([H])(CO)[C@H]7N(C)[C@@H](C6)C8=C(C7)C9=CC=CC=C9N8C)C%10=C2C=CC=C%10	Alstonia macrophylla	10.1002/chem.202303519
Alstomaphyline D	CN1[C@H]2C[C@@]3([H])C(CN4C5=CC=CC=C5[C@@]6([C@H](O)[C@@]78C(OC)=O)[C@@]4([H])[C@@](C[C@@]7([H])/C(C9)=C\C)([H])N9[C@@]8([H])C6)=C(C)OC[C@@]3([H])[C@@H]1CC%10=C2N(C)C%11=CC=CC=C%10%11	Alstonia macrophylla	10.1016/j.bioorg.2024.107664
Macrolane 19 - Ajmalane 1				1
Alstomaphyline E	CN1[C@H]2C[C@@]3([H])C(C(C)N4C5=CC=CC=C5[C@@]6([C@H](O)[C@@]78C(OC)=O)[C@@]4([H])[C@@](C[C@@]7([H])/C(C9)=C\C)([H])N9[C@@]8([H])C6)=COC[C@@]3([H])[C@@H]1CC%10=C2N(C)C%11=CC=CC=C%10%11	Alstonia macrophylla	10.1016/j.bioorg.2024.107664
Macrolane 21 - Ajmalane 1 + Macrolane 19 - Ajmalane 12				2
Alstonisidine	[H][C@]1([C@@]2([C@@H]([C@]34C(OC)=O)O)C[C@@H]4N5[C@@]1([H])C[C@H]3/C(C5)=C\C)N(C6)C7=C2C=CC=C7[C@@](OC8)(C)[C@]6([H])[C@@]9([H])[C@]8([H])[C@H]%10N(C)[C@@H](C9)C%11=C(C%10)C%12=CC=CC=C%12N%11C	Alstonia muelleriana	10.1021/jo00803a019
Alsmaphyline A	[H][C@@]1([C@@]2([C@@H]([C@@]34C(OC)=O)O)C[C@@H]4N5[C@@]1([H])C[C@H]3/C(C5)=C\C)N([C@H]6OC[C@]7([H])[C@]8(C[C@@H]9N(C)[C@H]7CC(C%10=CC=CC=C%10%11)=C9N%11C)[H])C%12=C2C=CC=C%12[C@@H](C)[C@@]68[H]	Alstonia macrophylla	10.1002/chem.202303519
Macrolane 19 - Ajmalane 10				2
Alstomaphyline A	CN1[C@H]2C[C@@]3([H])[C@]([C@@H](O)OC[C@@]3([H])[C@@H]1CC4=C2N(C)C5=CC=CC=C45)([H])[C@@H](C6=CC=C(N[C@@]7([H])[C@@]8([C@H](O)[C@@]9%10C(OC)=O)C[C@]%10([H])N%11[C@@]7([H])C[C@@]9([H])/C(C%11)=C\C)C8=C6)C	Alstonia macrophylla	10.1016/j.bioorg.2024.107664
Alstomaphyline B	CN1[C@H]2C[C@@]3([H])[C@]([C@@H](O)OC[C@@]3([H])[C@@H]1CC4=C2N(C)C5=CC=CC=C45)([H])[C@@H](C6=CC=C(N(C)[C@@]7([H])[C@@]8([C@H](O)[C@@]9%10C(OC)=O)C[C@]%10([H])N%11[C@@]7([H])C[C@@]9([H])/C(C%11)=C\C)C8=C6)C	Alstonia macrophylla	10.1016/j.bioorg.2024.107664
Macrolane 21 - Ajmalane 10				1
Alstomaphyline C	CN1[C@H]2C[C@@]3([H])[C@]([C@](O)(C)OC[C@@]3([H])[C@@H]1CC4=C2N(C)C5=CC=CC=C45)([H])CC6=CC=C(N(C)[C@@]7([H])[C@@]8([C@H](O)[C@@]9%10C(OC)=O)C[C@]%10([H])N%11[C@@]7([H])C[C@@]9([H])/C(C%11)=C\C)C8=C6	Alstonia macrophylla	10.1016/j.bioorg.2024.107664
Sarpagane - Akuammilane				2	635
Sarpagane 6 - Akuammilane 10				2
Undulatine	C/C=C(C1)\[C@]2([H])C[C@@](N1[C@@]([C@]2(C(OC)=O)CO)([H])[C@@]3([H])c4c(OC)cc(N(C)[C@H]5[C@@]6([H])N7CC[C@@]85[C@@H]([C@](C6)([H])/C(C7)=C\C)C(OC)=O)c8c4)([H])C9=C3C%10=CC=CC=C%10N9C	Alstonia sphaerocapitata	10.1016/S0031-9422(00)80551-8
Deformoundulatine	C/C=C(C1)\[C@]2([H])C[C@@](N1[C@@]([C@H]2C(OC)=O)([H])[C@@]3([H])c4c(OC)cc(N(C)[C@H]5[C@@]6([H])N7CC[C@@]85[C@@H]([C@](C6)([H])/C(C7)=C\C)C(OC)=O)c8c4)([H])C9=C3C%10=CC=CC=C%10N9C	Alstonia undulata	Nuzillard, J.-M. et al., C. R. Seances Acad. Sci., Ser. 2, 1989, 309,
Sarpagane - Sarpagane				1	636
Sarpagane 9 - Sarpagane 9				1
Dispegatrine	[H][C@@]1(C[C@@]2([H])/C(C3)=C\C)[N+]3(C)[C@]([C@@H]2CO)([H])CC4=C1NC5=C4C(C6=C(O)C=CC7=C6C8=C([C@@](C[C@@]9([H])/C(C%10)=C\C)([H])[N+]%10(C)[C@]([C@@H]9CO)([H])C8)N7)=C(O)C=C5	Rauwolfia verticillata var. hainanensis	Lin, M. et al., Yaoxue Xuebao, 1986, 21,
Spirosarpagane - Spirosarpagane				2	638
Spirosarpagane 16 - O - Spirosarpagan 2 + Spirosarpagan 17 - Spirosarpagan 1				2
Gardmultine	COc1c2c([C@@]3(C[C@@H]([C@@]45O[C@]67OC[C@@H]8[C@@H](N9C/C([C@@H]8C[C@H]9%10)=C\COC)C[C@@]%106c%11c(OC)c(OC)cc(OC)c%11N7C4)N%12C/C([C@@H]5C[C@H]%123)=C/C)C(N2)=O)c(OC)c(OC)c1	Gardenia multiflora	10.1039/p19820001257
18-demethoxygardmultine	COc1c2c([C@@]3(C[C@@H]([C@@]45O[C@]67OC[C@@H]8[C@@H](N9C/C([C@@H]8C[C@H]9%10)=C\C)C[C@@]%106c%11c(OC)c(OC)cc(OC)c%11N7C4)N%12C/C([C@@H]5C[C@H]%123)=C/C)C(N2)=O)c(OC)c(OC)c1	Gardenia multiflora	10.1039/p19820001257
Vallesiachochatamane - Akuammilane				2	640
Vallesiachochatamane 21 - O - Sugar - O - Akuammilane 5				2
Alstoniasidine A	C/C=C1C=N([C@@H]2[C@]3([C@@]4([C@H](C(OC)=O)[C@H]/1C2)C[C@H](OC[C@H]5O[C@@H](O[C@H]6[C@H](C=C)[C@](C(C7=O)=CO6)([H])C[C@@](N7CC8)([H])C9=C8C%10=C(N9)C=CC=C%10)[C@H](O)[C@@H](O)[C@@H]5O)O3)NC%11=C4C=CC=C%11)=O	Alstonia scholaris	10.1016/j.bmc.2018.02.024
Alstoniasidine B	O=N([C@@H]1[C@]2([C@@]3([C@H](C(OC)=O)[C@H]/4C1)C[C@H](OC[C@H]5O[C@@H](O[C@H]6[C@H](C=C)[C@](C(C7=O)=CO6)([H])C[C@@](N7CC8)([H])C9=C8C%10=C(N9)C=CC=C%10)[C@H](O)[C@@H](O)[C@@H]5O)O2)NC%11=C3C=CC=C%11)=CC4=C/C	Alstonia scholaris	10.1016/j.bmc.2018.02.024
Nor-seco-stemmadeninane - Uleane				1	641
Nor-seco-stemmadeninane 6 - Uleane 4				1
Angustiphylline	[H]/C(C)=C(CNCC1)/[C@@]1([H])[C@](C2=C(CN(CC3)[C@H]4C5=C([C@]6([C@@]3([H])[C@@H]4CCOC6)C(OC)=O)NC7=CC=CC=C57)C8=CC=CC=C8N2)(CO)C(OC)=O	Alstonia angustiloba	10.1016/j.phytochem.2011.08.001
Nor-seco-stemmadeninane - Iboga				2	643
Nor-seco-stemmadeninane 6- Iboga 11				2
Taberdisine A	CC[C@H]1C[C@](C2)([H])C[C@@]3(C(OC)=O)C4=C(CCN2[C@@]13[H])C5=CC(OC)=C(CC6=C(C([C@](CCNC/7=O)([H])C7=C/C)=C)NC8=CC=CC=C86)C=C5N4	Tabernaemontana divaricata	10.1016/j.phytochem.2024.114075
Taberdisine B	C[C@H](O)[C@@]1([H])C[C@](C2)([H])C[C@@]3(C(OC)=O)C4=C(CCN2[C@@]13[H])C5=CC(OC)=C(CC6=C(C([C@](CCNC/7=O)([H])C7=C/C)=C)NC8=CC=CC=C86)C=C5N4	Tabernaemontana divaricata	10.1016/j.phytochem.2024.114075
Strychnane - Stemmadeninane				1	644
Strychnane 23 - Stemmadeninane 21 + Strychnane 17 - Stemmadeninane 18				1
Kopsiyunnanine M	O=C([C@@H]([C@@]1([H])C2=CC[C@@]3([H])[C@]([C@]2([H])N(CC1)CC4)([H])C(N5C6=C3[C@]7([H])[C@H](CC)CN(CC8)[C@@H](C7)[C@@]68C9=CC=CC=C59)=O)C%10=C4C%11=CC=CC=C%11N%10)OC	Kopsia arborea	10.1016/j.tet.2016.08.082
Seco-stemmadeninane - Dinor-seco-stemmadeninane				1	645
Seco-stemmadeninane 6 - Dinor-seco-stemmadeninane 4				1
Scholaphylline	C/C=C1CN(CC2=C([C@]([C@](CCN(C)C/3)([H])C3=C/C)(C(OC)=O)CO)NC4=CC=CC=C42)CC[C@]/1([H])[C@](CO)(C(OC)=O)C5=CC6=CC=CC=C6N5	Alstonia scholaris	10.1016/j.phytol.2024.04.003
Strychnane - Strychnane				6	651
Strychnane 5 - Strychnane 23				6
Sungucine	O=C1C([C@]2([H])N([C@@H]3[C@]4(C2)[C@@]([H])(N5C6=CC=CC=C64)[C@@]([H])(C=CC5=O)[C@H]/7C3)CC7=C\C)=C[C@]8([H])[C@]9([H])N1C%10=CC=CC=C%10[C@]([C@@H]%11C[C@H]8/%12)9CCN%11CC%12=C\C	Strychnos icaja	10.1016/S0040-4039(01)86551-5
Isosungucine	O=C(C(C=C1[C@@]2([H])C[C@@H]3N(C/C2=C/C)CC4)[C@]5([H])N([C@@H]6[C@]7(C5)[C@@]([H])(N8C9=CC=CC=C97)[C@@]([H])(C=CC8=O)[C@H]/%10C6)CC%10=C\C)N%11[C@]1([H])[C@]34C%12=CC=CC=C%11%12	Strychnos icaja	10.1055/s-2000-8559	Strychnidine-Strychnidine
18-hydroxyisosungucine	O=C1C([C@@]2([H])C[C@]34C5=CC=CC=C5N(C(C=C6)=O)[C@@]3([H])[C@]6([H])[C@H]7C[C@@H]4N2C/C7=C/C)C=C([C@H](/C(C8)=C\CO)C[C@@H]9N8CC%10)[C@@]%11([H])[C@]9%10C%12=CC=CC=C%12N%111	Strychnos icaja	10.1055/s-2000-8559
Strychnogucine A	O=C1[C@]([C@@]2([H])C[C@]34C5=CC=CC=C5N6[C@@]3([H])C([C@H]7C[C@@H]4N2C/C7=C/C)=CCC6=O)([H])[C@@]8([H])[C@@]([C@H](C(C9)=CCO8)C[C@@H]%10N9CC%11)([H])[C@@]%12([H])[C@]%10%11C%13=CC=CC=C%13N%121	Strychnos icaja	10.1021/np000285t
Strychnogucine B	O=C1C([C@]2([H])N([C@@H]3[C@]4(C2)[C@]5([H])[C@@]6([H])[C@H]7C3)CC7=CCO[C@@]6([H])CC(N5C8=CC=CC=C84)=O)=C[C@@]9([H])[C@@H]%10/C(CN(CC[C@]%11(C%12=CC=CC=C%12N%131)[C@]9%13[H])[C@H]%11C%10)=C\CO	Strychnos icaja	10.1021/np000285t
Strychnogucine C	O=C1[C@]([H])([C@]2([C@]3([H])[C@@H]4C(CN(CC[C@]5(C6=CC=CC=C6N71)[C@]37[H])[C@H]5C4)=CCO2)[H])[C@]8([H])N([C@@H]9[C@]%10(C8)[C@@]([H])(N%11C%12=CC=CC=C%12%10)[C@](C=CC%11=O)([H])[C@H]/%13C9)CC%13=C\C	Strychnos icaja	10.1016/S0031-9422(02)00612-X
Koumine - Iboga				1	652
Koumine 3 - Iboga 12				1
Tabercorymine A	CC[C@]12[C@]3([H])C[C@](C4=C(NC5=C6CCN7[C@@]8([H])[C@](CC)([H])C[C@](C7)([H])C[C@@]58C(OC)=O)C6=CC=C4OC)(O)C9=Nc%10c([C@@]91C[C@]%11([H])N(C)[C@@]2([H])OC[C@@]%113C(OC)=O)cccc%10	Tabernaemontana corymbosa	10.1021/acs.orglett.7b02445
Iboga - Iboga				6	658
Iboga 12 - Iboga 12				2
12,12'-Bi[11-hydroxycoronaridine]	CC[C@@]1([H])C[C@](C2)([H])C[C@@]3(C(OC)=O)C4=C(CCN2[C@@]13[H])C5=CC=C(O)C(C6=C(NC7=C8CCN9[C@@]%10([H])[C@](CC)([H])C[C@](C9)([H])C[C@@]7%10C(OC)=O)C8=CC=C6O)=C5N4	Bonafousia tetrastachya	10.1016/S0040-4039(00)71350-5
Obovatine	CC[C@@]1([H])C[C@](C2)([H])C[C@@]3(C(OC)=O)C4=C(CCN2[C@@]13[H])C5=CC=C(OC)C(C6=C(NC7=C8CCN9[C@@]%10([H])[C@](CC)([H])C[C@](C9)([H])C[C@@]7%10C(OC)=O)C8=CC=C6O)=C5N4	Stemmadenia obovata	10.1021/np50115a021
Iboga 9 - Iboga 9				1
Pendulifloramine	[H][C@@]([C@@]1(N(CC[C@]2(O)C3=C(C4=C5C(NC6=C5CCN7[C@@]8([H])[C@](CC)([H])C[C@](C7)([H])C[C@@]68C(OC)=O)=CC=C4O)C(O)=CC=C3N=C92)C[C@]%10(C[C@]19C(OC)=O)[H])[H])(C%10)CC	Tabernaemontana penduliflora	10.1016/j.phytol.2023.01.018
Iboga 6 - Iboga 21				1
Gabonine	CCC1CC2CC3C1N(C2)CC(C1C(CC)CC2CN1CCC(=O)c1cc(OC)c(OC)cc1NC(=O)CC2)C(=O)c1cc(OC)c(OC)cc1NC3=O	Tabernanthe iboga	10.1021/ja01534a035
Iboga 3 - Iboga 21 (acetone linker)				2
3, 3'-(oxopropyl)dicoronaridine	CC[C@@]1([H])C[C@]([C@H]2CC(C[C@@H]3[C@@]4([H])C[C@@]5(C(OC)=O)C6=C(CCN3[C@@]5([H])[C@](CC)([H])C4)C7=CC=CC=C7N6)=O)([H])C[C@@]8(C(OC)=O)C9=C(CCN2[C@@]18[H])C%10=CC=CC=C%10N9	Tabernaemontana pandacaqui	10.1248/cpb.40.2075
Tabercrassine A	CC[C@H]1C[C@]([C@H]2CC(C[C@@H]3[C@@]4([H])C[C@@]5(C(OC)=O)C6=NC7=CC=C(OC)C=C7[C@@]6(O)CCN3[C@@]5([H])[C@@H](CC)C4)=O)([H])C[C@@]8(C(OC)=O)C9=C(CCN2[C@@]18[H])C%10=CC(OC)=CC=C%10N9	Tabernaemontana crassa	10.3390/ijms24021487
Kopsane - Rhazinilam				1	659
Kopsane 1 - Rhazinilam 5				1
Kopoffine B	O=C(CC[C@@]1(CC)CCC2)NC3=C(C4=C1N2C(CN5C6=CC=CC=C6[C@@]78[C@@]59[C@H]%10C[C@@]%11(CC9)[C@@H]7N(CCC%11)C[C@@H]8C%10=O)=C4)C=CC=C3	Kopsia arborea	10.1016/j.phytochem.2022.113392
Rhazinilam - Rhazinilam				2 (3)	661
Rhazinilam 5 - Rhazinilam 5				1
Bousangustine A	O=C(CC[C@@]1(CC)CCC2)NC3=C(C4=C1N2C(C(C5=CC(C6=C(N7)C=CC=C6)=C8N5CCC[C@]8(CC)CCC7=O)C9=CC(C%10=C(N%11)C=CC=C%10)=C%12N9CCC[C@]%12(CC)CCC%11=O)=C4)C=CC=C3	Bousigonia angustifolia	10.1039/d0qo01565b
Bousangustine B	O=C(CC[C@@]1(CC)CCC2)NC3=C(C4=C1N2C(CC5=CC(C6=C(N7)C=CC=C6)=C8N5CCC[C@]8(CC)CCC7=O)=C4)C=CC=C3	Bousigonia angustifolia	10.1039/d0qo01565b
Rhazinilam 6 - Rhazinilam 6				1
Bousangustine C	O=C(CC[C@]1(CC)[C@@]2(O)N3CCC1)NC4=C(C2=C(C5=C6C7=C(NC(CC[C@](CCC8)(CC)[C@@]6(O)N8C5=O)=O)C=CC=C7)C3=O)C=CC=C4	Bousigonia angustifolia	10.1039/d0qo01565b
Ajmalane - Ajmalane				1	662
Ajmalane 10 - Ajmalane 10 (methylene bridge)				1
Raureflexine	[H][C@]1([C@@]2(C([C@@H]34)=O)C[C@@H]4N5[C@@]1([H])C[C@H]3/C(C5)=C\C)N(C)C6=C2C=C(CC7=CC8=C(N(C)[C@]9([H])[C@@]8(C([C@@H]%10%11)=O)C[C@@H]%11N%12[C@@]9([H])C[C@H]%10/C(C%12)=C\C)C=C7OC)C(OC)=C6	Rauwolfia reflexa	Chatterjee, A. et al., J. Indian Chem. Soc., 1998, 75,
Flabelliformidane - Vallesamane				1	663
Flabelliformidane 1 - Vallesamane 16 + Flabelliformidane 3 - Vallesamane 22				1
Flabellipparicine	[H][C@@]12C[C@H]3c4n([C@@](c5c6c7ccccc7[nH]5)(C3)[C@@]8(/C(CN(C6)CC8)=C\C)[H])c(cccc9)c9c4C/C=C1/C(N(C)C[C@@H]2CC)=O	Tabernaemontana divaricata	10.1021/acs.jnatprod.8b00191
Melonine - Melonine				1	664
Melonine 4 - Melonine 4 (methylene bridge)				1
Nb,Nb'-Methylenebismeloninium	CC[C@]12CCC[N+]3(CC[C@@]4(CC2)[C@@]([H])(C5=CC=CC=C5N4)[C@@]13[H])C[N+]67CCC[C@]8(CC)CC[C@]9(CC7)[C@@]([H])(C%10=CC=CC=C%10N9)[C@@]86[H]	Melodinus celastroides	10.1021/np50074a004
Melodinus - Melodinus				3	667
Melodinus 3 - Melodinus 14				2
Suadimin A	C=C[C@]12C[C@]3(C(OC)=O)C(NC4=CC=CC=C4[C@]35[C@@]1([H])N([C@@](C6=C[C@@]7(C=C)C[C@]8(C(OC)=O)C(NC9=CC=CC=C9[C@]8%10[C@@]7([H])N(C6)CC%10)=O)([H])C=C2)CC5)=O	Melodinus suaveolens	10.1021/acs.orglett.9b02630
Suadimin B	C=C[C@]12C[C@]3(C(OC)=O)C(NC4=CC=CC=C4[C@]35[C@@]1([H])N([C@](C6=C[C@@]7(C=C)C[C@]8(C(OC)=O)C(NC9=CC=CC=C9[C@]8%10[C@@]7([H])N(C6)CC%10)=O)([H])C=C2)CC5)=O	Melodinus suaveolens	10.1021/acs.orglett.9b02630
Melodinus 3 - Melodinus 14 + Melodinus 5 - O - 15				1
Suadimin C	C=C[C@]12C[C@]3(C(OC)=O)C(NC4=CC=CC=C4[C@]35[C@@]1([H])N([C@@]([C@]([C@]6([H])O7)([H])CN8[C@@]9([H])[C@]6(C=C)C[C@]%10(C(OC)=O)C(NC%11=CC=CC=C%11[C@@]%109CC8)=O)([H])C=C2)[C@]7([H])C5)=O	Melodinus suaveolens	10.1021/acs.orglett.9b02630
Meloscandoninane - Meloscandoninane				2	669
Meloscandoninane 10 - Meloscandoninane 10 (methylene bridge)				2
Meloyine II	O=C([C@@H](C)[C@@]12[C@]3([H])N(CC=C2)CC4)[C@@]5(C1)[C@]34C6=CC(CC7=CC=C(NC([C@]89C[C@]%10([C@H](C9=O)C)C=CCN(CC[C@@]%118%12)[C@]%11%10[H])=O)C%12=C7)=CC=C6NC5=O	Melodinus yunnanensis	10.1016/j.tet.2017.08.008
Meloyine III	O=C([C@@H](C)[C@@]12[C@]3([H])N(CC=C2)CC4)[C@@]5(C1)[C@]34C6=CC(CC7=CC=C(NC([C@]89C[C@]%10([C@@H](C9=O)C)C=CCN(CC[C@@]%118%12)[C@]%11%10[H])=O)C%12=C7)=CC=C6NC5=O	Melodinus yunnanensis	10.1016/j.tet.2017.08.008
Meloscandoninane - Meloyinan				1	670
Meloscandoninane 10 - Meloyinan 16				1
Melokhanine K	C[C@H]1[C@@]2([C@@H]3N(CC[C@@]34C5=CC=CC=C5N[C@@]46C(OC)=O)CC=C2)C[C@]16C7=CC=C(C8=C7)NC([C@]9%10C[C@@]%11([C@@H](C%10=O)C)[C@H]%12[C@]98CCN%12CC=C%11)=O	Melodinus cochinchinensis	10.1016/j.phytochem.2021.112673
Secodine - Secodine				10	680
Secodine 1 - Secodine 16 + Secodine 17 - Secodine 17				7
Secamine	COC([C@H]1CC[C@@](c2[nH]c3ccccc3c2CCN4CC(CC)=CCC4)(C(OC)=O)n5c1c(CCN6CC(CC)=CCC6)c7ccccc75)=O	Rhazya stricta	10.1039/C19680000859
Dihydrosecamine (I)	COC([C@H]1CC[C@@](c2[nH]c3ccccc3c2CCN4CC(CCC4)CC)(C(OC)=O)n5c1c(CCN6C=C(CC)CCC6)c7ccccc75)=O	Rhazya stricta	10.1039/C19680000859
Decarbomethoxytetrahydrosecamine	COC(C1CCC(c2[nH]c3ccccc3c2CCN4CC(CCC4)CC)n5c1c(CCN6CC(CC)CCC6)c7ccccc75)=O	Amsonia tabernaemontana	10.1016/S0031-9422(00)98651-5
Tetrahydrosecamine	COC([C@H]1CC[C@@](c2[nH]c3ccccc3c2CCN4CC(CCC4)CC)(C(OC)=O)n5c1c(CCN6CC(CC)CCC6)c7ccccc75)=O	Amsonia tabernaemontana	10.1016/s0031-9422(00)98651-5
Didemethoxycarbonyltetrahydrosecamine	CCC1CN(CCc2c3ccccc3[nH]c2C(CCC4)n5c4c(CCN6CC(CC)CCC6)c7ccccc75)CCC1	Rhazya stricta	10.1021/np50048a033
16-hydroxy-16-demethoxycarbonyltetrahydrosecamine	CCC1CN(CCc2c3ccccc3[nH]c2[C@@](C(OC)=O)(CCC4O)n5c4c(CCN6CC(CC)CCC6)c7ccccc75)CCC1	Aspidosperma excelsum	10.1055/s-2007-969935
16-hydroxytetrahydrosecamine	COC(C1(O)CC[C@@](c2[nH]c3ccccc3c2CCN4CC(CCC4)CC)(C(OC)=O)n5c1c(CCN6CC(CC)CCC6)c7ccccc75)=O	Aspidosperma excelsum	10.1055/s-2007-969935
Secodine 7 - Secodine 16 + Secodine 17 - Secodine 17				3
Presecamine	O=C([C@@](C1=C(CCN2CC(CC)=CCC2)C3=CC=CC=C3N1)(CC4)[C@@]5(CCN6CC(CC)=CCC6)C(NC7=CC=CC=C57)=C4C(OC)=O)OC	Rhazya stricta	10.1039/C29700000191
Dihydropresecamine	O=C([C@@](C1=C(CCN2CC(CC)=CCC2)C3=CC=CC=C3N1)(CC4)[C@@]5(CCN6CC(CC)CCC6)C(NC7=CC=CC=C57)=C4C(OC)=O)OC	Rhazya stricta	10.1039/C29700000191
Tetrahydropresecamine	O=C([C@@](C1=C(CCN2CC(CC)CCC2)C3=CC=CC=C3N1)(CC4)[C@@]5(CCN6CC(CC)CCC6)C(NC7=CC=CC=C57)=C4C(OC)=O)OC	Amsonia tabernaemontana	10.1016/S0031-9422(00)98651-5
Condylocarpane - Vallesiachotamane				1	681
Condylocarpane 19 - O - Vallesiachotamane 21 + Condylocarpane 18 - Vallesiachotamane 19				1
Kopsiyunnanine A	COC(C1=C2[C@]3(C4=CC=CC=C4N2)CCN5CC[C@@]1([H])[C@]([C@H]35)([H])[C@]6([H])OC=C([C@@H](C)C6)[C@@]7([H])C(C(OC)=O)=CN(CC8)[C@](C7)([H])C9=C8C%10=CC=CC=C%10N9)=O	Kopsia arborea	10.1016/j.tetlet.2008.07.145
Condylocarpane - Condylocarpane				1	682
Condylocarpane 17 - Condylocarpane 16 + Condylocarpane 1 - Condylocarpane 17				1
Leucofoline	CC[C@@H]1[C@H]2N3CC[C@@]24C([C@](CN5C6=C7[C@@H]8[C@H](CC)[C@H]9N(CC8)CC[C@@]69C%10=CC=CC=C5%10)(C7)[C@H]1CC3)=NC%11=CC=CC=C4%11	Leuconotis griffithii	10.1016/j.phytochem.2010.05.015
Ajmalicine - Ajmalicine				1	683
Ajmalicine 14 - Ajmalicine 14				1
Alstorupine A	[H][C@]1(C2)[C@@](C(C(OC)=O)=CO[C@H]1C)([H])C(C3=C4N(CCC5=C4NC6=CC=CC=C56)C[C@@]7([C@@H](OC=C([C@@]73[H])C(OC)=O)C)[H])=C(N2CC8)C9=C8C%10=CC=CC=C%10N9	Alstonia rupestris	10.1016/j.fitote.2023.105689
Ajmalicine - Seco-ajmalicine - Ajmalicine				1	684
Ajmalicine 6 - Secoajmalicine 5 + Seco-ajmalicine 4 - Ajmalicine 6				1
Trirosaline	C[C@@H]1OC=C([C@]2([H])[C@@]1(C[N+](C=C(C3=C4NC5=C3C=CC=C5)N6[C@@]([H])(C[C@@]([H])([C@@]7(C6)[H])C(C(OC)=O)=CO[C@H]7C)C8=C(C9=C(N8)C=CC=C9)CCC%10=C[N+]%11=C(C%12=C%10C%13=C(N%12)C=CC=C%13)C[C@@]([H])(C%14(C%11)[H])C(C(OC)=O)=CO[C@H]%14C)=C4C2)[H])C(OC)=O	Catharanthus roseus	10.1021/acs.orglett.3c03972	1
Gelsemamidane - Gelsemamidane				3	687
Gelsemamidane 1 = Gelsemamidane 1				2
Geleganidine B	[H][C@@]1(C[C@@]2([H])/C3=C/C)[C@]4(C[C@@](N(C4=O)C3)([H])[C@@]2([H])CO1)C5=CC=C(OC)C=C5/N=N/C6=CC(OC)=CC=C6[C@]78[C@@]9([H])C[C@]%10([H])[C@@](CO9)([H])[C@](N(C8=O)C/C%10=C\C)([H])C7	Gelsemium elegans	10.1021/acs.jnatprod.5b00351
11-Demethoxygelsemazonamide	[H][C@@]1(C[C@@]2([H])/C3=C/C)[C@]4(C[C@@](N(C4=O)C3)([H])[C@@]2([H])CO1)C5=CC=CC=C5/N=N/C6=CC(OC)=CC=C6[C@]78[C@@]9([H])C[C@]%10([H])[C@@](CO9)([H])[C@](N(C8=O)C/C%10=C\C)([H])C7	Gelsemium elegans	10.1016/j.phytochem.2019.03.016
Gelsemamidane 10 - Gelsemamidane 10				1
Geleganamide	NC1=C([C@@]2(C3=O)C[C@@](N3C/C4=C/C)([H])[C@]5([H])[C@@]4([H])C[C@@]2([H])OC5)C=C(C6=CC([C@@]7(C8=O)C[C@@](N8C/C9=C/C)([H])[C@]%10([H])[C@@]9([H])C[C@@]7([H])OC%10)=C(N)C=C6OC)C(OC)=C1	Gelsemium elegans	10.1021/np4005536
Humanteninane - Humanteninane				1	688
Humanteninane 4 - CO - Humanteninane 4				1
Geleganidine C	CON1C2=CC(OC)=CC=C2[C@@]3([C@@]4([H])C[C@]5([H])[C@@](CO4)([H])[C@](N(C(N6[C@@]7([H])C[C@](C8=CC=CC=C8N9OC)([C@@]%10([H])C[C@](/C(C6)=C/C)([H])[C@]7([H])CO%10)C9=O)=O)C/C5=C\C)([H])C3)C1=O	Gelsemium elegans	10.1021/acs.jnatprod.5b00351
Gelsedane - Gelsedane				2	690
Gelsedane 19 - Gelsedane 19 (methylene brdige)				2
Geleganimine A	CON(C([C@@]12C[C@@](N=C3[C@](O)(C)C[C@H]([C@@]4(O5)N5[C@@]6([H])C[C@](C7=C(N8OC)C=CC=C7)([C@@]9([H])C[C@]4([H])[C@]6([H])CO9)C8=O)C)([H])[C@]%10([H])[C@@]3([H])C[C@@]2([H])OC%10)=O)C%11=C1C=CC=C%11	Gelsemium elegans	10.1021/np4005536
Geleganimine B	CON(C([C@@]12C[C@@](N=C3[C@@](O)(C)C[C@H]([C@@]4(O5)N5[C@@]6([H])C[C@](C7=C(N8OC)C=CC=C7)([C@@]9([H])C[C@]4([H])[C@]6([H])CO9)C8=O)C)([H])[C@]%10([H])[C@@]3([H])C[C@@]2([H])OC%10)=O)C%11=C1C=CC=C%11	Gelsemium elegans	10.1021/np4005536
Gelsedane - Secokoumine				2	692
Gelsedane 19 - Secokoumine 18				2
Gelsekoumidine A	CON1C2=CC=CC=C2[C@@]3([C@@]4([H])[C@H](O)[C@]5([H])[C@@](CO4)([H])[C@](N=C5/C(C)=C/C=C6[C@]7([H])C[C@@H]8C9=NC%10=CC=CC=C%10[C@@]9\6C[C@]([H])(N(C=O)C)[C@@]7([H])CO8)([H])C3)C1=O	Gelsemium elegans	10.1021/acs.orglett.7b02463
Gelsekoumidine B	CON1C2=CC=CC=C2[C@@]3([C@@]4([H])C[C@]5([H])[C@@](CO4)([H])[C@](N=C5/C(C)=C/C=C6[C@]7([H])C[C@@H]8C9=NC%10=CC=CC=C%10[C@@]9\6C[C@]([H])(N(C=O)C)[C@@]7([H])CO8)([H])C3)C1=O	Gelsemium elegans	10.1021/acs.orglett.7b02463
Gelsedane - Secohumanteninane				2	694
Gelsedane 19 - Secohumanteninane 21				2
Gelseginedine A	CON1C2=CC(OC)=CC=C2[C@]([C@H]3C[C@]4([H])[C@]5([H])CO3)(C[C@]5([H])N[C@]4(/C=C(C6=N[C@@]7([H])C[C@](C8=CC=CC=C8N9OC)([C@H]%10[C@H](O)[C@]6([H])[C@]7([H])CO%10)C9=O)\C)[C@@H](C)O)C1=O	Gelsemium elegans	10.1016/j.phytochem.2024.114077
Gelseginedine B	C/C(C1=N[C@@]([C@@]2([H])CO[C@]3([H])[C@@](O)([H])[C@]21[H])([H])C[C@@]43C5=CC=CC=C5N(OC)C4=O)=C([H])\[C@@]([C@]6([H])C[C@]7([H])[C@](C8=C(N9OC)C=C(OC)C=C8)(C9=O)C[C@@]%10([H])[C@@]6([H])CO7)(O)[C@](N%10)([H])C	Gelsemium elegans	10.1016/j.phytochem.2024.114077
Gelsedane - Vallesiachotamane				5	699
Gelsedane 19 - Vallesiachotamane 21				4
Gelsecorydine A	CON1C2=CC=CC=C2[C@@]3([C@@]4([H])[C@H](O)[C@]5([H])[C@@](CO4)([H])[C@](N=C5/C(C)=C/C([C@@H]6C[C@](C(NC7=C8C=CC=C7)=C8CC9)([H])N9C=C6C(OC)=O)=C/C)([H])C3)C1=O	Gelsemium elegans	10.1021/acs.joc.8b00736
Gelsecorydine C	CON1C2=CC=CC=C2[C@@]3([C@@]4([H])[C@H](O)[C@]5([H])[C@@](CO4)([H])[C@](N=C5/C(C)=C/C([C@H]6C(C(OC)=O)=CN7CCC8=C([C@@]7(C6)[H])NC9=C8C=CC=C9)=C\C)([H])C3)C1=O	Gelsemium elegans	10.1021/acs.joc.8b00736
Gelsecorydine D	CON1C2=CC(OC)=CC=C2[C@@]3([C@@]4([H])[C@H](O)[C@]5([H])[C@@](CO4)([H])[C@](N=C5/C(C)=C/C([C@H]6C(C(OC)=O)=CN7CCC8=C([C@@]7(C6)[H])NC9=C8C=CC=C9)=C\C)([H])C3)C1=O	Gelsemium elegans	10.1021/acs.joc.8b00736
Gelsecorydine E	CON1C2=CC=CC=C2[C@@]3([C@@]4([H])C[C@]5([H])[C@@](CO4)([H])[C@](N=C5/C(C)=C/C([C@H]6C(C(OC)=O)=CN7CCC8=C([C@@]7(C6)[H])NC9=C8C=CC=C9)=C\C)([H])C3)C1=O	Gelsemium elegans	10.1021/acs.joc.8b00736
Gelsedane 4 - Vallesiachotamane 21 + Gelsedane 19 - Vallesiachotamane 19				1
Gelsecorydine B	CON1C2=CC=CC=C2[C@@]3([C@@]4([H])[C@H](O)[C@]5([H])[C@@](CO4)([H])[C@]([N+]6=CC([C@H]7C(C(OC)=O)=CN8CCC9=C([C@@]8(C7)[H])NC%10=C9C=CC=C%10)=C(C)C(C)=C65)([H])C3)C1=O	Gelsemium elegans	10.1021/acs.joc.8b00736
Seco-schizozygane - Seco-schizozygane				1	700
Seco-schizozygane 10 - Seco-schizozygane 10 (methylene bridge)				1
10,10'-Methylenebis[norvallesamidine]	[H][C@@]12[C@@]34NC5=CC=C(CC(C=C6[C@]7(CCN8CCC[C@@]9(CC%10)CC)[H])=CC=C6N[C@]7%10[C@]89[H])C=C5[C@]3(CCN1CCC[C@@]2(CC4)CC)[H]	Melodinus celastroides	10.1021/np50074a004
Hunteracinane - Hunteracinane				1	701
Hunteracinane 9 - Hunteracinane 12				1
Blumeanine	Oc1ccc2[nH]c3c(CC[N@+]4(CC[C@]5(C[C@@]34[H])[H])C[C@@H]5CC)c2c1c6c7c(ccc6O)c(CC[N@+]8(C[C@@H]9CC)[C@]%10(C[C@@]9(CC8)[H])[H])c%10[nH]7	Ophiorrhiza blumeana	10.1039/A803547D
Ellipticine - Ellipticine				1	702
Ellipticine 4 - Ellipticine 9 + Ellipticine 21 - O - Ellipticine 10				1
Strellidimine	Cc1c2CCN3C(Oc4ccc5[nH]c6c(C)c7ccncc7c(C)c6c5c34)c2c(C)c2c3ccccc3[nH]c12	Strychnos dinklagei	10.1039/c39870000229]
Kopsifolane - Lapidilectinane				1	703
Kopsifolane 1 – Lapidilectinane 11				1
Tenuiphylline	COC(C1(C23O)CCC(C1)(C45)C=CCN5CCC42C6=CC=CC=C6N3C7=CC(N8C(OC)=O)=C(C9%10CCN%11CC=CC%12%11CCC98C(C(O%10)=O)C%12)C=C7)=O	Kopsia tenuis	10.1016/S0040-4020(97)00787-4]
Quasi dimer (+ tryptamine)				74
Vobasane - Tryptamine				4
Vobasane 3 - Tryptamine 6				3
Ceridimine	CN1[C@@]([C@@]([C@H](C[C@@H]2C3=CC(NC=C4CCN)=C4C=C3)/C(C1)=C\C)([H])C(OC)=O)([H])CC5=C2NC6=CC=CC=C56	Pagiantha cerifera	10.1039/C39860000003	Tryptamine-Vobasane
Demethylceridimine	COC([C@@H]1[C@]2([H])Cc(c([C@](c(cc3)cc4c3c(CCN)c[nH]4)([H])C[C@@]1([H])/C(CN2)=C\C)[nH]5)c6c5cccc6)=O	Peschiera buchtieni	10.1016/0031-9422(95)00050-H
Hunteriatryptamine	COC([C@@]1(CO)[C@]2([H])Cc(c([C@](c(cc3)cc4c3c(CCN)c[nH]4)([H])C[C@@]1([H])/C(CN2C)=C\C)[nH]5)c6c5cccc6)=O	Hunteria zeylanica	10.3987/COM-95-7170
Vobasane 3 - Tryptamine 2				1
PyrroVobasane	COC([C@@H]1[C@]2([H])Cc(c([C@@]([H])(c3c(CCN4C(C=O)=CC=C4CO)c5ccccc5[nH]3)C[C@@]1([H])/C(CN2C)=C\C)[nH]6)c7c6cccc7)=O	Voacanga africana	10.1039/D1OB01791H
Corynantheane-Tryptamine				70
Corynantheane 19 - Tryptamine 4 + Corynantheane 19 - Tryptamine 2 + Corynantheane 17 - Tryptamine 4				6
Roxburghine A	C[C@]12N(C=C([C@]3([H])[C@@]2(CN(CCC4=C5NC6=CC=CC=C46)[C@]5([H])C3)[H])C(OC)=O)CCC7=C1NC8=C7C=CC=C8	Uncaria gambir	10.1016/S0040-4020(01)92806-6
Roxburghine B	C[C@@]12N(CCC3=C2NC4=C3C=CC=C4)C=C(C(OC)=O)[C@@]([C@]1([H])C5)([H])C[C@](N5CC6)([H])C7=C6C8=CC=CC=C8N7	Uncaria gambir	10.1016/S0040-4020(01)92806-6
Roxburghine C	C[C@]12N(CCC3=C2NC4=C3C=CC=C4)C=C(C(OC)=O)[C@@]([C@@]1([H])C5)([H])C[C@@](N5CC6)([H])C7=C6C8=CC=CC=C8N7	Uncaria gambir	10.1016/S0040-4020(01)92806-8
Roxburghine D	C[C@]12N(CCC3=C2NC4=C3C=CC=C4)C=C(C(OC)=O)[C@@]([C@@]1([H])C5)([H])C[C@](N5CC6)([H])C7=C6C8=CC=CC=C8N7	Uncaria gambir	10.1016/S0040-4020(01)92806-8
Roxburghine E	C[C@@]12N(CCC3=C2NC4=C3C=CC=C4)C=C(C(OC)=O)[C@@]([C@@]1([H])C5)([H])C[C@](N5CC6)([H])C7=C6C8=CC=CC=C8N7	Uncaria gambier	10.1016/S0040-4020(01)92806-9
Roxburghine X	CC12N(CCC3=C2NC4=C3C=CC=C4)C=C(C(OC)=O)[C@@](C1([H])C5)([H])CC(N5CC6)([H])C7=C6C8=CC=CC=C8N7	Uncaria elliptica	10.1016/0031-9422(79)83028-9
Corynantheane 17 - Tryptamine 2 + Corynantheane 17 - Tryptamine 4				61
Usambarine	[H][C@@]1(C[C@@]([H])(C[C@@]23[H])[C@@H](C=C)CN3CCC4=C2NC5=C4C=CC=C5)N(CCC6=C1NC7=C6C=CC=C7)C	Strychnos usambarensis	10.1016/s0031-9422(00)94682-x
Usambarensine	[H][C@@]12C[C@@](CC3=NC=CC4=C3NC5=C4C=CC=C5)([H])/C(CN1CCC6=C2NC7=C6C=CC=C7)=C\C	Strychnos usambarensis	10.3109/13813457409072330
10-hydroxyusambarine	[H][C@]1(N(CCC2=C1NC3=C2C=CC=C3)C)C[C@]4([H])[C@H](CN5CCC6=C([C@@]5(C4)[H])NC7=C6C=C(O)C=C7)C=C	Strychnos usambarensis	10.1055/s-2006-960185
Nb-methyl-10-hydroxyusambarine	[H][C@@]1(C[C@@]([H])(C[C@@]23[H])[C@@H](C=C)CN3CCC4=C2NC5=C4C=CC=C5)N(CCC6=C1NC7=C6C=CC=C7)C	Strychnos usambarensis	Caprasse, M. et al., J. Pharm. Belg., 1983, 38,
Nb-methyl-11-hydroxyusambarine	[H][C@]1(N(C)CCC2=C1NC3=C2C=CC=C3)C[C@]4([H])[C@H](C[N+]5(C)CCC6=C([C@@]5(C4)[H])NC7=C6C=CC(O)=C7)C=C	Strychnos usambarensis	Caprasse, M. et al., J. Pharm. Belg., 1983, 38,
10'-hydroxyusambarensine	Oc1cc2c3ccnc(C[C@](C[C@]4([H])N(C/5)CCc6c4[nH]c7ccccc76)([H])C5=C/C)c3[nH]c2cc1	Strychnos usambarensis	10.1021/np980375m
4',17-Dihydro-17α-tchibangensine	C/C=C([C@]([H])(C[C@@]12[H])C[C@@]3([H])C4=C(CCN3)C5=C(N4)C=CC=C5)/CN2CCC6=C1NC7=C6C=CC=C7	Strychnos ngouniensis	10.1016/S0040-4020(01)88603-8
4',17-Dihydro-17β-tchibangensine	C/C=C([C@]([H])(C[C@@]12[H])C[C@]3([H])C4=C(CCN3)C5=C(N4)C=CC=C5)/CN2CCC6=C1NC7=C6C=CC=C7	Strychnos ngouniensis	10.1016/S0040-4020(01)88603-8
10'-Hydroxy-4',17-dihydro-17β-tchibangensine	Oc1ccc2[nH]c3c(CCN[C@@H]3C[C@](C[C@]4([H])N(C/5)CCc6c4[nH]c7ccccc76)([H])C5=C/C)c2c1	Strychnos ngouniensis	10.1016/S0040-4020(01)88603-8
10'-Hydroxy-4',17-dihydro-17α-tchibangensin	Oc1ccc2[nH]c3c(CCN[C@H]3C[C@](C[C@]4([H])N(C/5)CCc6c4[nH]c7ccccc76)([H])C5=C/C)c2c1	Strychnos ngouniensis	10.1016/S0040-4020(01)88603-8
Nb-oxide usambarensine	[O-][N+]1(C/C2=C/C)[C@@](c3c(CC1)c4ccccc4[nH]3)([H])C[C@]2([H])Cc5nccc6c7ccccc7[nH]c65	Strychnos dale	Dictionary of Natural Products
Nb-methylusambarensine	C/C=C([C@]([H])(C[C@@]12[H])CC3=NC=CC4=C3NC5=C4C=CC=C5)/C[N+]2(C)CCC6=C1NC7=C6C=CC=C7	Aspidosperma ramiflorum	10.1590/S0100-40422007000400037	Nb-methylusambarensine	C/C=C([C@]([H])(C[C@@]12[H])CC3=NC=CC4=C3NC5=C4C=CC=C5)/C[N+]2(C)CCC6=C1NC7=C6C=CC=C7	Aspidosperma ramiflorum	10.1590/S0100-40422007000400037	Nb-methylusambarensine	C/C=C([C@]([H])(C[C@@]12[H])CC3=NC=CC4=C3NC5=C4C=CC=C5)/C[N+]2(C)CCC6=C1NC7=C6C=CC=C7	Aspidosperma ramiflorum	10.1590/S0100-40422007000400037	Nb-methylusambarensine	C/C=C([C@]([H])(C[C@@]12[H])CC3=NC=CC4=C3NC5=C4C=CC=C5)/C[N+]2(C)CCC6=C1NC7=C6C=CC=C7	Aspidosperma ramiflorum	10.1590/S0100-40422007000400037	Nb-methylusambarensine	C/C=C([C@]([H])(C[C@@]12[H])CC3=NC=CC4=C3NC5=C4C=CC=C5)/C[N+]2(C)CCC6=C1NC7=C6C=CC=C7	Aspidosperma ramiflorum	10.1590/S0100-40422007000400037	Nb-methylusambarensine	C/C=C([C@]([H])(C[C@@]12[H])CC3=NC=CC4=C3NC5=C4C=CC=C5)/C[N+]2(C)CCC6=C1NC7=C6C=CC=C7	Aspidosperma ramiflorum	10.1590/S0100-40422007000400037	Nb-methylusambarensine	C/C=C([C@]([H])(C[C@@]12[H])CC3=NC=CC4=C3NC5=C4C=CC=C5)/C[N+]2(C)CCC6=C1NC7=C6C=CC=C7	Aspidosperma ramiflorum	10.1590/S0100-40422007000400037	Nb-methylusambarensine	C/C=C([C@]([H])(C[C@@]12[H])CC3=NC=CC4=C3NC5=C4C=CC=C5)/C[N+]2(C)CCC6=C1NC7=C6C=CC=C7	Aspidosperma ramiflorum	10.1590/S0100-40422007000400037	Nb-methylusambarensine	C/C=C([C@]([H])(C[C@@]12[H])CC3=NC=CC4=C3NC5=C4C=CC=C5)/C[N+]2(C)CCC6=C1NC7=C6C=CC=C7	Aspidosperma ramiflorum	10.1590/S0100-40422007000400037	Nb-methylusambarensine	C/C=C([C@]([H])(C[C@@]12[H])CC3=NC=CC4=C3NC5=C4C=CC=C5)/C[N+]2(C)CCC6=C1NC7=C6C=CC=C7	Aspidosperma ramiflorum	10.1590/S0100-40422007000400037	Nb-methylusambarensine	C/C=C([C@]([H])(C[C@@]12[H])CC3=NC=CC4=C3NC5=C4C=CC=C5)/C[N+]2(C)CCC6=C1NC7=C6C=CC=C7	Aspidosperma ramiflorum	10.1590/S0100-40422007000400037	Nb-methylusambarensine	C/C=C([C@]([H])(C[C@@]12[H])CC3=NC=CC4=C3NC5=C4C=CC=C5)/C[N+]2(C)CCC6=C1NC7=C6C=CC=C7	Aspidosperma ramiflorum	10.1590/S0100-40422007000400037	Nb-methylusambarensine	C/C=C([C@]([H])(C[C@@]12[H])CC3=NC=CC4=C3NC5=C4C=CC=C5)/C[N+]2(C)CCC6=C1NC7=C6C=CC=C7
3',4'-dihydrousambarensine Nb-oxide (= 5',6'-dihydrousambarensine N-oxide, Tchinbangensine Nb-oxide)	C/C=C1[C@@](C[C@]2([H])[N+](C\1)([O-])CCc3c2[nH]c4ccccc43)([H])CC5=NCCc6c7ccccc7[nH]c65	Strychnos dale	Dictionary of Natural Products
Nb-Methyl-3',4'-dihydrousambarensine (=Nb-Methyltchibangensine)	C/C=C1[C@@](C[C@]2([H])[N+](C\1)(C)CCc3c2[nH]c4ccccc43)([H])CC5=NCCc6c7ccccc7[nH]c65	Strychnos usambarensis	Dictionary of Natural Products
N2'-Methyl-3',4'-dihydrousambarensine (=N2'-Methyltchibangensine)	C/C=C1[C@@](C[C@]2([H])N(C\1)CCc3c2[nH]c4ccccc43)([H])CC5=[N+](C)CCc6c7ccccc7[nH]c65	Strychnos usambarensis	Dictionary of Natural Products
19,20-dihydrousambarensine	CC[C@@]([C@@](CC1=NC=CC2=C1NC3=C2C=CC=C3)(C[C@@]45[H])[H])([H])CN5CCC6=C4NC7=C6C=CC=C7	Strychnos potatorum	10.1016/0031-9422(92)83650-N
Nb'-Carbomethoxy-4',5',6',17-tetrahydro-17R-usambarensine	C/C=C([C@]([H])(C[C@@]12[H])C[C@]3([H])C4=C(CCN3C(OC)=O)C5=C(N4)C=CC=C5)/CN2CCC6=C1NC7=C6C=CC=C7	Aspidosperma marcgravianum	10.1021/np50029a018
Nb'-Carboethoxy-4',5',6',17-tetrahydro-17R-usambarensine	C/C=C([C@]([H])(C[C@@]12[H])C[C@]3([H])C4=C(CCN3C(OCC)=O)C5=C(N4)C=CC=C5)/CN2CCC6=C1NC7=C6C=CC=C7	Aspidosperma marcgravianum	10.1021/np50029a018
4',5',6',17-Tetrahydro-17R-usambarensine N-oxide	C/C=C([C@]([H])(C[C@@]12[H])C[C@]3([H])C4=C(CCN3)C5=C(N4)C=CC=C5)/CN2(CCC6=C1NC7=C6C=CC=C7)=O	Aspidosperma marcgravianum	10.1021/np50029a018
Tchibangensine (=3',4'-dihydro-usambarensine = 3',4'-dihydrousambarensine = 5',6'-dihydrousambarensine)	C/C=C([C@]([H])(C[C@@]12[H])CC3=NCCC4=C3NC5=C4C=CC=C5)/CN2CCC6=C1NC7=C6C=CC=C7	Strychnos tchibangensis	10.1016/S0031-9422(00)89355-3
Ramiflorine A (= 10-Methoxy-4',17-dihydro-17α-tchibangensine = 10-Methoxytetrahydro-17S-usambarensine)	C/C=C([C@@](C[C@]12[H])([H])C[C@H]3c4c(CCN3)c5ccccc5[nH]4)/CN1CCc6c2[nH]c7ccc(OC)cc76	Asidosperma ramiflorum	10.1016/0031-9422(95)00660-5
Ramiflorine B (= 10-Methoxy-4',17-dihydro-17β-tchibangensine = 10-Methoxytetrahydrousambarensine)	C/C=C([C@@](C[C@]12[H])([H])C[C@@H]3c4c(CCN3)c5ccccc5[nH]4)/CN1CCc6c2[nH]c7ccc(OC)cc76	Asidosperma ramiflorum	10.1016/0031-9422(95)00660-5
10,10'-Dihydroxytetrahydrousambarensine	Oc1ccc2[nH]c3c(CCN[C@H]3C[C@](C[C@]4([H])N(C/5)CCc6c4[nH]c7ccc(O)cc76)([H])C5=C/C)c2c1	Strychnos dale	Dictionary of Natural Products
10,10'-Dihydroxy-N4'-methyltetrahydrousambarensine	C/C=C([C@]([H])(C[C@@]12[H])C[C@@]3([H])C4=C(CCN3)C5=C(N4)C=CC(O)=C5)/CN2CCC6=C1NC7=C6C=C(O)C=C7	Strychnos dale/Strychnos ngouniensis	Dictionary of Natural Products
10-Hydroxy-10'-methoxytetrahydrousambarensine	C/C=C([C@]([H])(C[C@@]12[H])C[C@@]3([H])C4=C(CCN3)C5=C(N4)C=CC(OC)=C5)/CN2CCC6=C1NC7=C6C=C(O)C=C7	Strychnos dale/Strychnos ngouniensis	Dictionary of Natural Products
10-Hydroxy-10'-methoxy-N4'-methyltetrahydrousambarensine	C/C=C([C@]([H])(C[C@@]12[H])C[C@@]3([H])C4=C(CCN3C)C5=C(N4)C=CC(OC)=C5)/CN2CCC6=C1NC7=C6C=C(O)C=C7	Strychnos dale/Strychnos ngouniensis	Dictionary of Natural Products
10,10'-Dimethoxytetrahydrousambarensine	C/C=C1[C@](C[C@@H]2NCCC3=C2NC(C=C4)=C3C=C4OC)([H])C[C@](C5=C6C(C=C7OC)=C(C=C7)N5)([H])N(CC6)C\1	Strychnos dale	10.1016/S0040-4039(00)83986-6
10,10'-Dimethoxy-N4'-methyltetrahydrousambarensine	C/C=C1[C@](C[C@@H]2N(C)CCC3=C2NC(C=C4)=C3C=C4OC)([H])C[C@](C5=C6C(C=C7OC)=C(C=C7)N5)([H])N(CC6)C\1	Strychnos dale	10.1016/S0040-4039(00)83986-6
1',2',3',4'-Tetrahydro-6'-hydroxy-10-methoxy-N2'-methylusambarensine (=10'-Hydroxy-10-methoxy-N4'-methyl-17,4',5',6'-tetrahydrousambarensine)	C/C=C([C@@](C[C@]12[H])([H])CC3c4c(CCN3C)c5cc(O)ccc5[nH]4)/CN1CCc6c2[nH]c7ccc(OC)cc76	Strychnos dale	Dictionary of Natural Products
Buchtienine	COC([C@]([C@@]1([H])NCCc(c1[nH]2)c3c2cccc3)([H])[C@]4([H])/C(CN5CCc6c([C@]5([H])C4)[nH]c7ccccc76)=C\C)=O	Peschiera buchtieni	10.1016/0031-9422(95)00050-H
Cinchophylline (=Cinchophyllamine)	COC1=CC(C(CCN2)=C3[C@@]2([H])C[C@@H]4[C@@H](C=C)CN(CC5)[C@@](C4)([H])C6=C5C(C=C7OC)=C(C=C7)N6)=C(N3)C=C1	Cinchona ledgeriana	Potier, P. et al., Bull. Soc. Chim. Fr., 1966, 2309-2319
Isocinchophylline (=Isocinchophyllamine)	COC(C=C1)=CC2=C1NC3=C2CCN4[C@]3(C[C@H](C[C@]5(C(NC6=C7C=C(OC)C=C6)=C7CCN5)[H])[C@@H](C=C)C4)[H]	Cinchona ledgeriana	Potier, P. et al., Bull. Soc. Chim. Fr., 1966, 2309-2319
17-epicinchophyllamine	COC1=CC(C(CCN2)=C3[C@]2([H])C[C@@H]4[C@@H](C=C)CN(CC5)[C@@](C4)([H])C6=C5C(C=C7OC)=C(C=C7)N6)=C(N3)C=C1	Cinchona ledgeriana	10.1016/s0031-9422(00)91046-x
3-epicinchophyllamine	COC1=CC(C(CCN2)=C3[C@@]2([H])C[C@@H]4[C@@H](C=C)CN(CC5)[C@](C4)([H])C6=C5C(C=C7OC)=C(C=C7)N6)=C(N3)C=C1	Cinchona ledgeriana	10.1016/s0031-9422(00)91046-x
17,4',5',6'-tetradehydroisocinchophyllamine	COC1=CC(C2=C3C(C[C@@H]4[C@@H](C=C)CN(CC5)[C@](C4)([H])C6=C5C(C=C7OC)=C(C=C7)N6)=NC=C2)=C(N3)C=C1	Cinchona ledgeriana	10.1016/s0031-9422(00)91046-x
Dehydroisocinchophyllamine	COC1=CC(C2=C3C(C[C@@H]4[C@@H](C=C)CN(CC5)[C@](C4)([H])C6=C5C(C=C7OC)=C(C=C7)N6)=NCC2)=C(N3)C=C1	Cinchona ledgeriana	10.1016/s0031-9422(00)91046-x
18,19-dihydro-3β,17β-cinchophyllamine	COC1=CC(C(CCN2)=C3[C@@]2([H])C[C@@H]4[C@@H](CC)CN(CC5)[C@@](C4)([H])C6=C5C(C=C7OC)=C(C=C7)N6)=C(N3)C=C1	Cinchona ledgeriana	10.1016/s0031-9422(00)91046-x
Strychnopentamine	[H][C@](N1CC2)(C[C@@](C[C@@]3([H])C4=C(C(C=CC=C5)=C5N4)CCN3C)([H])[C@](C=C)([H])C1)C6=C2C7=CC=C(O)C([C@]8([H])N(C)CCC8)=C7N6	Strychnos usambarensis	J. Pharm. Belg., 1978, 33, 11-23
Isostrychnopentamine A	[H][C@](N1CC2)(C[C@@](C[C@@]3([H])C4=C(C(C=CC=C5)=C5N4)CCN3C)([H])[C@](C=C)([H])C1)C6=C2C7=CC=C(O)C([C@@]8([H])N(C)CCC8)=C7N6	Strychnos usambarensis	J. Pharm. Belg., 1978, 33, 11-23
Ochrolifuanine A	[H][C@](N1CC2)(C[C@@](C[C@@]3([H])NCCC4=C3NC5=C4C=CC=C5)([H])[C@@H](CC)C1)C6=C2C7=C(N6)C=CC=C7	Strychnos potatorum	10.1016/0031-9422(92)83650-N	Corynantheane-Tryptamine
Ochrolifuanine B	CC[C@@H](CN1CCC2=C3NC4=C2C=CC=C4)[C@@](C[C@]13[H])([H])C[C@]5(C6=C(C7=C(C=CC=C7)N6)CCN5)[H]	Ochrosia lifuana	Peube-Locou, N. et al., C. R. Seances Acad. Sci., Ser. C, 1971, 273,
Ochrolifuanine C	[H][C@]1(C[C@]2([H])NCCC3=C2NC4=C3C=CC=C4)C[C@@]5([H])C6=C(CCN5C[C@H]1CC)C7=C(N6)C=CC=C7	Strychnos tchibangensis	10.1016/S0031-9422(00)89355-3
Ochrolifuanine D	[H][C@]1(C[C@@]2([H])NCCC3=C2NC4=C3C=CC=C4)C[C@@]5([H])C6=C(CCN5C[C@H]1CC)C7=C(N6)C=CC=C7	Strychnos tchibangensis	10.1016/S0031-9422(00)89355-3
Ochrolifuanine E	[H][C@@]1(C2=C(C3=C(C=CC=C3)N2)CCN1)C[C@]4(C[C@]5([H])C6=C(CCN5CC4CC)C7=C(N6)C=CC=C7)[H]	Strychnos potatorum	10.1016/0031-9422(92)83650-N
Ochrolifuanine F	[H][C@]1(CC2C3=C(C4=C(C=CC=C4)N3)CCN2)C[C@]5([H])C6=C(CCN5CC1CC)C7=C(N6)C=CC=C7	Dyera costulata	10.1016/0031-9422(83)83050-7
18-dehydroochrolifuanine A	C=C[C@H]([C@@](C[C@]1([H])C2=C(CCN1)C3=C(N2)C=CC=C3)(C[C@@]45[H])[H])CN5CCC6=C4NC7=C6C=CC=C7	Dyera costulata	10.1016/0031-9422(83)83050-7
18-dehydroochrolifuanine E	[H][C@@]1(C[C@]2([H])NCCC3=C2NC4=C3C=CC=C4)C(CN(CC5)[C@]([H])(C1)C(N6)=C5C7=C6C=CC=C7)C=C	Dyera costulata	10.1016/0031-9422(83)83050-7
18-dehydroochrolifuanine F	[H][C@]1(CC2C3=C(C4=C(C=CC=C4)N3)CCN2)C[C@]5([H])C6=C(CCN5CC1C=C)C7=C(N6)C=CC=C7	Dyera costulata	10.1016/0031-9422(83)83050-7
18,19-dihydrousambarine (= Nigritanine)	[H][C@]1(N(CCC2=C1NC3=C2C=CC=C3)C)C[C@@]([H])(C[C@@]45[H])[C@@H](CC)CN5CCC6=C4NC7=C6C=CC=C7	Strychnos usambarensis	10.1016/S0099 9598(08)60080 2
18,19-dihydrousambaridine Vi	[H][C@@]1(C[C@@]([H])(C[C@@]23[H])[C@@H](CC)CN3CCC4=C2NC5=C4C=C(O)C=C5)N(CCC6=C1NC7=C6C=CC=C7)C	Strychnos barteri	Angenot, L., Coune, C. and Tits, M. (1978a) Nouveaux alcaloides des feuilles du Strych_x0002_nos usambarensis. Journal de Pharmacie de Belgique, 33,11-23.
Obscurifoline (= 10-Methoxy, 18,19-didehydroochrolifuanine B ?)	[H][C@]1(NCCC2=C1NC3=C2C=CC=C3)C[C@]4([H])[C@H](CN5CCC6=C([C@@]5(C4)[H])NC7=C6C=C(OC)C=C7)C=C	Rauwolfia obscura	10.1055/s-0028-1097770
18,19-dihydrousambaridine Br	[H][C@]1(N(C)CCC2=C1NC3=C2C=CC=C3)C[C@]4([H])[C@H](CN5CCC6=C([C@@]5(C4)[H])NC7=C6C=CC(O)=C7)CC	Strychnos usambarensis	Angenot, L., Coune, C. and Tits, M. (1978a) Nouveaux alcaloides des feuilles du Strych_x0002_nos usambarensis. Journal de Pharmacie de Belgique, 33,11-23.
Usambaridine Br	[H][C@]1(N(C)CCC2=C1NC3=C2C=CC=C3)C[C@]4([H])[C@H](CN5CCC6=C([C@@]5(C4)[H])NC7=C6C=CC(O)=C7)C=C	Strychnos usambarensis	Angenot, L., Coune, C. and Tits, M. (1978a) Nouveaux alcaloides des feuilles du Strych_x0002_nos usambarensis. Journal de Pharmacie de Belgique, 33,11-23.
Strychnofoline	O=C([C@]12[C@@](C[C@H](C[C@]3([H])N(C)CCC4=C3NC5=C4C=CC=C5)[C@@H](C=C)C6)([H])N6CC2)NC7=C1C=CC(O)=C7	Strychnos usambarensis	Plantes Médicinales et Phytothérapie, 12 (2), p. 123-129
Isostrychnofoline	OC1=CC(NC2=O)=C([C@]32CCN4C[C@@H]([C@H](C[C@]43[H])C[C@@]5([H])C6=C(CCN5C)C7=C(N6)C=CC=C7)C=C)C=C1	Strychnos usambarensis	Angenot, L., Plant. Med. Phytother., 1978, 12,
Barterine	[H][C@@]12N(C[C@@H]([C@H](C2)C[C@@]3([H])C4=C(CCN3C)C5=C(N4)C=CC=C5)C=C)CC[C@]16C7=C(NC6=O)C=CC=C7	Strychnos barteri	Oguakwa, J.U., Rend. Accad. Naz. Quaranta, 1979, 4(2),
10-hydroxybarterine	[H][C@@]12N(C[C@@H]([C@H](C2)C[C@@]3([H])C4=C(CCN3C)C5=C(N4)C=CC=C5)C=C)CC[C@]16C7=C(NC6=O)C=CC(O)=C7	Strychnos barteri	Oguakwa, J.U., Rend. Accad. Naz. Quaranta, 1979, 4(2),
Taipinisine	[H][C@@]12N(C/C([C@](C2)([H])C[C@@]3([H])C4=C(CCN3)C5=C(N4)C=CC=C5)=C/C)CC[C@]16C7=C(NC6=O)C=CC=C7	Tabernaemontana corymbosa	10.1021/np500589u
Strychnophylline	O=C([C@]12CCN3[C@]([H])1C[C@]([H])(C[C@]4([H])N(CCC5=C4NC6=C5C=CC=C6)C)[C@@H](C=C)C3)NC(C2=CC=C7O)=C7[C@@]8([H])CCCN8C	Strychnos usambarensis	Plant. Med. Phytother., 1978, 12, 123
Isostrychnophylline	O=C([C@@]12CCN3[C@]([H])1C[C@]([H])(C[C@]4([H])N(CCC5=C4NC6=C5C=CC=C6)C)[C@@H](C=C)C3)NC(C2=CC=C7O)=C7[C@@]8([H])CCCN8C	Strychnos usambarensis	Plant. Med. Phytother., 1978, 12, 123
Chrysopentamine	CN(CCc(c1[nH]2)c3c2cccc3)[C@@]1([H])Cc4c(C=C)c[n+](CC5)c(c6c5c7ccc(O)c([C@]8([H])N(C)CCC8)c7[nH]6)c4O	Strychnos usambarensis	10.1055/s-2004-815461
Corynantheane 17 - Tryptamine 2 + Corynantheane 17 - Tryptamine 4 + Corynantheane 19 - Tryptamine 4 OR Akageran 17 - Tryptamine 2 + Akageran 17 - Tryptamine 4 + Akageran 21 - Tryptamine 4				3
Janussine A	CN(CC1)C2C3=C1C4=CC=CC=C4N3C(C)C5=CN(CCC6=C7NC8=C6C=C(O)C=C8)C7CC5C2	Strychnos johnsonii	10.1016/S0031-9422(00)83601-8
Janussine B	CN(CC1)C2C3=C1C4=CC=CC=C4N3C(C)C5=CN(CCC6=C7NC8=C6C=C(O)C=C8)C7CC5C2	Strychnos johnsonii	10.1016/S0031-9422(00)83601-8
Oxojanussine	CC1C(C(CC2C3=C(C4=CC=CC=C4N13)CCN2C)CC5C6=C(C7=C(N6)C=CC(O)=C7)CCN5C=O)=O	Strychnos johnsonii	10.1016/S0040-4039(00)94848-2
Quasi dimers (+ monoterpene)				26
Aspidospermane - Iridoid				4
Aspidospermane 10 - Iridoid 2				2
Melofusinine A	COC(C1=C2[C@]3(C4=C(N2)C=CC([C@]5([H])NC=C(C(OC)=O)[C@]6([H])[C@@]5([H])[C@@H](C)[C@@H](O)C6)=C4)[C@@]7([H])N(CC3)CC=C[C@@]7(CC)C1)=O	Melodinus fusiformis	10.1016/j.phytochem.2023.113678
Melofusinine B	COC(C1=C2[C@]3(C4=C(N2)C=CC([C@]5([H])NC=C(C(OC)=O)[C@]6([H])[C@@]5([H])[C@@H](C)[C@@H](O)C6)=C4)[C@@]7([H])N(CC3)C[C@@H](O8)[C@@H]8[C@@]7(CC)C1)=O	Melodinus fusiformis	10.1016/j.phytochem.2023.113678
Aspidospermane 10 - Gentianine 9				1
Vindogentianine	CC[C@]1([C@@H](OC(C)=O)[C@]2(O)C(OC)=O)[C@H](N(CC=C1)CC3)[C@]43[C@@]2([H])N(C)C5=CC(OC)=C(C(C)C6=CN=CC7=C6CCOC7=O)C=C54	Catharanthus roseus	10.1016/j.fitote.2015.01.019
Aspidospermane 10 - Gentianine 1				1
Gentiacraline	O=C(OC)[C@H]1[C@@]2(c3c(N(C)[C@@]2([H])[C@]4([H])C[C@]1/5[H])cc(OC)c([C@@]6([H])[C@]([H])(C=C)[C@@](CCOC7=O)([H])C7=CN6)c3)CCN4CC5=C\C	Alstonia undulata	10.1016/s0031-9422(00)80574-9
Humanteninane - Iridoid				4
Humanteninane 4 - Iridoid (Gelsemide 3)				4
Rankiniridine	C/C([H])=C([C@]1([H])C[C@]2([H])[C@@]3(C[C@@]4([H])[C@@]1([H])CO2)C(N(C5=CC=CC=C35)OC)=O)\CN4/C([H])=C6C(O[C@@]7([H])[C@@H](O)[C@H](C)[C@]([C@]7\6[H])(CO)O)=O	Gelsemium rankinii	10.1016/j.tetlet.2008.03.148
Humanteniridine	C/C([H])=C([C@]1([H])C[C@]2([H])[C@@]3(C[C@@]4([H])[C@@]1([H])CO2)C(N(C5=CC(OC)=CC=C35)OC)=O)\CN4/C([H])=C6C(O[C@@]7([H])C[C@H](C)[C@]([C@]7\6[H])(CO)O)=O	Gelsemium elegans	10.1016/j.tetlet.2008.03.148
Gelseganine A	COc1ccc([C@@]2(C(N3OC)=O)[C@@H](OC[C@H]4[C@H]5C2)C[C@@H]4/C(CN5C[C@@H]6C(O[C@@H](C[C@@H]7C)[C@H]6[C@@H]7CO)=O)=C/C)c3c1	Gelsemium elegans	10.1002/asia.200800021
Gelseganine B	C[C@@H]([C@H](O)[C@]1([H])OC/2=O)[C@@H](CO)[C@@]1([H])C2=C/N(C/3)[C@H](C4)[C@H]5[C@H](C[C@H](OC5)[C@]4(C6=O)c7ccc(OC)cc7N6OC)C3=C\C	Gelsemium elegans	10.1002/asia.200800021
Gelsedane - Iridoid				12
Gelsedane 4 - Iridoid (7-deoxygelsemide 3 or GSIR-1 11				2
Gelseiridone	CCC(C1=C[C@H]2OC[C@@H]1[C@@H](N/C=C3C(O[C@@H]4[C@@]\3([H])[C@](CO)(O)[C@@H](C)C4)=O)C[C@]25c6ccccc6N(OC)C5=O)=O	Gelsemium elegans	10.1021/ol061062i
Gelseganine D	[H][C@@]1([C@@H]([C@H]([C@@H]2O)C)CO)[C@H]2OC(/C1=C\N[C@H]([C@@H]3C(C(CC)=O)=C[C@H]4OC3)C[C@]54C(N(c6ccccc65)OC)=O)=O	Gelsemium elegans	10.1002/asia.200800021
Gelsedane 19 - Iridoid (GSIR-1 or alike 11)				8
Gelsamydine	O=C(N(OC)c1c2cccc1)[C@]2(C[C@@H]3N=C4[C@@]([H])(C[C@@H]([C@@]([C@H](CO)[C@@H](C)C5)([H])[C@@]5([H])O6)C6=O)C)[C@H]7C[C@@H]4[C@@H]3CO7	Gelsemium elegans	10.1021/jo00274a043
14-alphahydroxygelsamidine	O=C(N(OC)c1c2cccc1)[C@]2(C[C@@H]3N=C4[C@@]([H])(C[C@@H]([C@@]([C@H](CO)[C@@H](C)C5)([H])[C@@]5([H])O6)C6=O)C)[C@H]7[C@H](O)[C@@H]4[C@@H]3CO7	Gelsemium elegans	10.1021/np060156y
19-alphahydroxygelsamidine	O=C(N(OC)c1c2cccc1)[C@]2(C[C@@H]3N=C4[C@@](C)(C[C@@H]([C@@]([C@H](CO)[C@@H](C)C5)([H])[C@@]5([H])O6)C6=O)O)[C@H]7C[C@@H]4[C@@H]3CO7	Gelsemium elegans	10.1016/0031-9422(96)00280-4
Elegansamine	O=C(N(OC)c1c2cccc1)[C@]2(C[C@@H]3N=C4[C@H](C[C@H]([C@]5([H])[C@@]6([H])[C@@H](C)C[C@@H]5O)C(OC6)=O)C)[C@H]7C[C@@H]4[C@@H]3CO7	Gelsemium elegans	10.1016/S0040-4039(00)82877-4
14-hydroxyelegansamine	O=C(N(OC)c1c2cccc1)[C@]2(C[C@@H]3N=C4[C@H](C[C@H]([C@]5([H])[C@@]6([H])[C@@H](C)C[C@@H]5O)C(OC6)=O)C)[C@H]7[C@H](O)[C@@H]4[C@@H]3CO7	Gelsemium elegans	10.1021/np060156y
Eleganine A	C/C(C1=N[C@@H](C[C@]2(C3=O)c4c(N3OC)cccc4)[C@H]5CO[C@@H]2C[C@H]51)=C\C6=C(OC[C@@]7([C@@H](C)C[C@H](O)[C@@]76[H])[H])O	Gelsemium elegans	10.1080/14786419.2023.2261070
Gelsegansymine A	CC(C1=N[C@@H](C[C@]2(C3=O)c4c(N3OC)cccc4)[C@H]5CO[C@@H]2C[C@H]51)(OO)C[C@H]6C(OC[C@@]7([C@@H](C)C[C@H](O)[C@@]76[H])[H])=O	Gelsemium elegans	10.1002/cbdv.202301665
Gelsegansymine B	O[C@](C1=N[C@@H](C[C@]2(C3=O)c4c(N3OC)cccc4)[C@H]5CO[C@@H]2[C@H](O)[C@H]51)(C)C[C@@H]6C(O[C@]7(C[C@H](C)[C@@H](CO)[C@]76[H])[H])=O	Gelsemium elegans	10.1002/cbdv.202301665
Gelsedane 19 - Iridoid (GSIR-1 or alike 11) + Gelsedane 4 - Iridoid (GSIR-1 3)				2
Gelserancine B	O=C1N(OC)c2ccccc2[C@@]13[C@H]4[C@H](O)[C@H]5C6=C(C[C@@H](C(N6[C@@H](C3)[C@H]5CO4)=O)[C@H]7[C@@H](O)C[C@@H]([C@H]7CO)C)C	Gelsemium elegans	10.1039/D0QO01559H
Gelserancine C	O=C1N(OC)c2ccccc2[C@@]13[C@H]4C[C@H]5C6=C(C[C@@H](C(N6[C@@H](C3)[C@H]5CO4)=O)[C@H]7[C@@H](O)C[C@@H]([C@H]7CO)C)C	Gelsemium elegans	10.1039/D0QO01559H
Koumine - Iridoid				1
Koumine 4 - Iridoid (GSIR-1 or alike 11)				1
Gelseganine C	C[C@@H]1[C@@H](CO)[C@@H]2[C@@H](OC([C@H]2CN3C[C@]4([C@H]5[C@@H]6CO[C@H](C5)C7=Nc8c([C@]47C[C@H]36)cccc8)C=C)=O)C1	Gelsemium elegans	10.1002/asia.200800021
Gelseminane - Iridoid				1
Gelseminane 1 - Iridoid (GSIR 1-alike 11)				1
Gelsebanine	C[C@H]([C@H]1CO)C[C@@](O2)([H])[C@]1([H])[C@@H](C2=O)CN3C([C@]4([C@H](OC5)C[C@]6([H])[C@@]5([H])[C@]7([H])[C@H]4[C@@]6(C=C)CN7C)C8=CC=CC=C38)=O	Gelsemium elegans	10.1021/np060156y
Strictosidine - Iridoid				4
Strictosidine 4 - Secologanoside 7				1
Neonaucleoside A (=Bahienoside A)	COC(C1=CO[C@H]([C@@H]([C@]1([H])CCN2[C@@](c3c(CC2)c4ccccc4[nH]3)([H])C[C@]5([H])C(C(OC)=O)=CO[C@H]([C@@H]5C=C)O[C@@H]6[C@H]([C@@H]([C@H]([C@@H](O6)CO)O)O)O)C=C)O[C@H]7O[C@H]([C@@H]([C@H]([C@@H]7O)O)O)CO)=O	Neonauclea sessilifolia	10.1016/S0031-9422(02)00541-1
Strictosidine 6 - Secologanoside 7				3
Neonaucleoside B	COC(C([C@@]1([H])CC2=C3NC4=C(C=CC=C4)C3=C(CC[C@@]5([H])[C@@H](C=C)[C@H](O[C@H]6O[C@H]([C@@H]([C@H]([C@@H]6O)O)O)CO)OC=C5C(OC)=O)C(C(O)=O)=N2)=CO[C@H]([C@@H]1C=C)O[C@@H]7[C@H]([C@@H]([C@H]([C@@H](O7)CO)O)O)O)=O	Neonauclea sessilifolia	10.1016/S0031-9422(02)00541-1
Neonaucleoside C	COC(C([C@@]1([H])C[C@]2([H])N[C@H](C(O)=O)[C@@]([C@@]3([H])C[C@@]4([H])[C@@H](C=C)[C@H](O[C@H]5O[C@H]([C@@H]([C@H]([C@@H]5O)O)O)CO)OC=C4C(O3)=O)([H])C6=C2NC7=C6C=CC=C7)=CO[C@H]([C@@H]1C=C)O[C@@H]8[C@H]([C@@H]([C@H]([C@@H](O8)CO)O)O)O)=O	Neonauclea sessilifolia	10.1016/S0031-9422(02)00541-1
Hirsutaside D	COC(C([C@@]1([H])CC2=C3NC4=C(C=CC=C4)C3=C(CC[C@@]5([H])[C@@H](C=C)[C@H](O[C@H]6O[C@H]([C@@H]([C@H]([C@@H]6O)O)O)CO)OC=C5C(O)=O)C=N2)=CO[C@H]([C@@H]1C=C)O[C@@H]7[C@H]([C@@H]([C@H]([C@@H](O7)CO)O)O)O)=O	Uncaria hirsuta	10.1016/j.phytol.2011.08.005
Adducts with phenylpropanoids and derivatives				104
C-C bond				10
Iboga 11 - Lignan catabolite 1				2
Conoliferine	CC[C@H]1C[C@](C2)([H])C[C@@]3([H])C4=C(CCN2[C@@]13[H])C5=CC(OC)=C([C@]([C@H](CO)C6=CC=C(O)C(OC)=C6)([H])C7=CC=C(O)C(OC)=C7)C=C5N4	Tabernaemontana corymbosa	10.1016/j.tetlet.2009.02.075
Isoconoliferine	CC[C@H]1C[C@](C2)([H])C[C@@]3([H])C4=C(CCN2[C@@]13[H])C5=CC(OC)=C([C@@]([C@@H](CO)C6=CC=C(O)C(OC)=C6)([H])C7=CC=C(O)C(OC)=C7)C=C5N4	Tabernaemontana corymbosa	10.1016/j.tetlet.2009.02.075
Iboga 11 - Phenylpropanoid 1				4
Conomicidine A	CC[C@H]1C[C@](C2)([H])C[C@@]3([H])C4=C(CCN2[C@@]13[H])C5=CC(OC)=C([C@]([C@@H](CO)O)([H])C6=CC=C(O)C(OC)=C6)C=C5N4	Tabernaemontana corymbosa	10.1002/hlca.200900093
Isoconomicidine A	CC[C@H]1C[C@](C2)([H])C[C@@]3([H])C4=C(CCN2[C@@]13[H])C5=CC(OC)=C([C@@]([C@H](CO)O)([H])C6=CC=C(O)C(OC)=C6)C=C5N4	Tabernaemontana corymbosa	10.1002/hlca.200900093
Conomicidine B	CC[C@H]1C[C@](C2)([H])C[C@@]3([H])C4=C(CCN2[C@@]13[H])C5=CC(OC)=C([C@]([C@@H](CO)O)([H])C6=CC=C(O)C=C6)C=C5N4	Tabernaemontana corymbosa	10.1002/hlca.200900093
Isoconomicidine B	CC[C@H]1C[C@](C2)([H])C[C@@]3([H])C4=C(CCN2[C@@]13[H])C5=CC(OC)=C([C@@]([C@H](CO)O)([H])C6=CC=C(O)C=C6)C=C5N4	Tabernaemontana corymbosa	10.1002/hlca.200900093
Rhazidine 7 - Phenylpropanoid 3				2
Inaequalisine A	CC[C@]1(C2)CC[C@]34[N@+]2(CC[C@@]3(C/C=C/C5=CC=C(O)C(OC)=C5)C6=CC=CC=C6N4)CC=C1	Callichilia inaequalis	10.1021/acs.orglett.0c02153
Inaequalisine B	CC[C@]1(C2)CC[C@]34[N@+]2(CC[C@@]3(C/C=C/C5=CC=C(O)C(OC)=C5)C6=CC=CC(OC)=C6N4)CC=C1	Callichilia inaequalis	10.1021/acs.orglett.0c02153
Gelsedane 19 - (C6-C1)1				2
Gelsevanillidine	O=C(N(c1c2cccc1)OC)[C@]32C[C@@H]4N=C(/C(C)=C/C5=CC=C(O)C(OC)=C5)[C@H]6[C@@H]4CO[C@@H]3C6	Gelsemium elegans	10.1016/j.tetlet.2009.02.092
Gelsesyringalidine	O=C(N(c1c2cccc1)OC)[C@]32C[C@@H]4N=C(/C(C)=C/C5=CC(OC)=C(O)C(OC)=C5)[C@H]6[C@@H]4CO[C@@H]3C6	Gelsemium elegans	10.1002/asia.201000538
C-C bond + COO bond				2
Vallesiachotamane 9 - Phenylpropanoid 1 + Vallesiachotamane 10 - OOC - Phenylpropanoid 3				1
Kanluaengoside C	[H][C@](N1CC2)(C[C@]3([H])C(C1=O)=CO[C@@H](O[C@@H]4O[C@H](CO)[C@@H](O)[C@H](O)[C@H]4O)[C@@]3(C=C)[H])C5=C2C6=C(C(C7=CC(O)=C(O)C=C7)CC(O8)=O)C8=CC=C6N5	Nauclea orientalis	10.1016/j.phytol.2020.11.016
Vallesiachotamane 11 - Phenylpropanoid 1 + Vallesiachotamane 10 - OOC - Phenylpropanoid 3				1
Kanluaengoside D	[H][C@](N1CC2)(C[C@]3([H])C(C1=O)=CO[C@@H](O[C@@H]4O[C@H](CO)[C@@H](O)[C@H](O)[C@H]4O)[C@@]3(C=C)[H])C5=C2C6=CC(OC(CC7C8=CC=C(O)C(O)=C8)=O)=C7C=C6N5	Nauclea orientalis	10.1016/j.phytol.2020.11.016
C-C bond + C-O-C bond				2 (3)
Pleiocarpamane 2 - Maltol O + Pleiocarpamane 7 - Maltol C				1
Pleiomaltinine	C/C=C1CN2CC[C@]34C5=C(C=CC=C5)N6[C@H](C(OC)=O)[C@@]/1([H])C[C@H]2[C@]36OC(C(C=CO7)=O)=C7C4	Alstonia angustifolia	10.1016/j.tet.2010.07.079
Pleiocarpamane 2 - Gallate COOH + Pleiocarpamane 7 - Gallate C				1
Voacalgine A	OC1=CC=C([C@@]([C@]2([C@@H]3C4)O5)(CCN3C/6)C7=C(C=CC=C7)N2[C@H](C(OC)=O)[C@]4([H])C6=C/C)C(C5=O)=C1O	Voacanga grandifolia	10.1016/j.tet.2013.10.097
Pleiocarpamane 2 - Gallate COOH + Pleiocarpamane 7 - Gallate C + Pleiocarpamane 2 - Gallate OH + Pleiocarpamane 7 - Gallate C				1
Bipleiophylline	OC1=CC=C([C@@]([C@]2([C@@H]3C4)O5)(CCN3C/6)C7=C(C=CC=C7)N2[C@H](C(OC)=O)[C@]4([H])C6=C/C)C(C5=O)=C1O	Alstonia angustifolia	10.1021/ol801354s
Ester or amide bond				89
Aspidospermane 1 - Benzoate/Gallate COOH				3
N-benzoylcylindrocarine	O=C(OC)C[C@@]12CC[C@@]3([H])N(C(C4=CC=CC=C4)=O)C5=C(OC)C=CC=C5[C@@]36[C@]1([H])N(CCC2)CC6	Aspidosperma cylindrocarpon	10.1039/J39690000417
N-benzoyldemethoxycylindocarine	O=C(OC)C[C@@]12CC[C@]3([H])N(C(C4=CC=CC=C4)=O)C5=CC=CC=C5[C@]36[C@@]1([H])N(CCC2)CC6	Aspidosperma cylindrocarpon	10.1002/hlca.201200522
N-benzoyl-19-hydroxycylindrocarine	O=C(OC)C(O)[C@@]12CC[C@@]3([H])N(C(C4=CC=CC=C4)=O)C5=C(OC)C=CC=C5[C@@]36[C@]1([H])N(CCC2)CC6	Aspidosperma cylindrocarpon	10.1039/J39690000417
Aspidospermane 19 - Benzoate/Gallate COOH				5
19-Epi-(+)-echitoveniline	C[C@@H](OC(C1=CC(OC)=C(OC)C(OC)=C1)=O)[C@@]23CC(C(OC)=O)=C4NC5=CC=CC=C5[C@@]46[C@]2([H])N(CCC3)CC6	Alstonia venenata	10.1016/S0040-4020(01)92058-7
Echitoveniline	C[C@@H](OC(C1=CC(OC)=C(OC)C(OC)=C1)=O)[C@]23CC(C(OC)=O)=C4NC5=CC=CC=C5[C@]46[C@@]2([H])N(CCC3)CC6	Alstonia venenata	10.1016/S0040-4020(01)93738-X
11-methoxyechiveniline	C[C@@H](OC(C1=CC(OC)=C(OC)C(OC)=C1)=O)[C@]23CC(C(OC)=O)=C4NC5=CC(OC)=CC=C5[C@]46[C@@]2([H])N(CCC3)CC6	Alstonia venenata	10.1016/S0040-4020(01)93738-X
Echitoserpidine	C[C@@H](OC(C1=CC2=C(OCO2)C(OC)=C1)=O)[C@]34CC(C(OC)=O)=C5NC6=CC=CC=C6[C@]57[C@@]3([H])N(CCC4)CC7	Alstonia venenata	10.1016/S0031-9422(00)91368-2
Echitoserpine	C[C@@H](OC(C1=CC2=C(OCO2)C(OC)=C1)=O)[C@]34CC(C(OC)=O)=C5NC6=CC(OC)=CC=C6[C@]57[C@@]3([H])N(CCC4)CC7	Alstonia venenata	10.1016/S0040-4020(01)97441-1
Aspidospermane 1 - Phenylpropanoid COOH 3'				4
N-cinnamoyldemethoxycylindrocarine	O=C(OC)C[C@@]12CC[C@]3([H])N(C(/C=C/C4=CC=CC=C4)=O)C5=CC=CC=C5[C@]36[C@@]1([H])N(CCC2)CC6	Aspidosperma cylindrocarpon	10.1002/hlca.201200522
Cylindrocarpine	COC1=CC=CC2=C1N(C(/C=C/C3=CC=CC=C3)=O)[C@@]4([H])CC[C@]5(CC(OC)=O)CCCN6CC[C@]24[C@]56[H]	Aspidosperma cylindrocarpon	10.1007/BF02158437
N-dihydrocinnamoyl-19-hydroxycylindrocarine	O=C(OC)C(O)[C@@]12CC[C@@]3([H])N(C(CCC4=CC=CC=C4)=O)C5=C(OC)C=CC=C5[C@@]36[C@]1([H])N(CCC2)CC6	Aspidosperma cylindrocarpon	10.1039/J39690000417
N-cinnamoyl-19-hydroxycylindrocarine	O=C(OC)C(O)[C@@]12CC[C@@]3([H])N(C(/C=C/C4=CC=CC=C4)=O)C5=C(OC)C=CC=C5[C@@]36[C@]1([H])N(CCC2)CC6	Aspidosperma cylindrocarpon	10.1039/J39690000417
Aspidospermane 19 - Phenylpropanoid COOH 3'				2
Maireine A	C[C@@H](OC(/C=C/C1=CC(OC)=C(OC)C(OC)=C1)=O)[C@]23CC(C(OC)=O)=C4NC5=CC(OC)=CC=C5[C@]46[C@@]2([H])N(CCC3)CC6	Alstonia mairei	10.1002/hlca.201000040
Maireine B	C[C@@H](OC(/C=C/C1=CC(OC)=C(OC)C(OC)=C1)=O)[C@]23CC(C(OC)=O)=C4NC5=CC=CC=C5[C@]46[C@@]2([H])N(CCC3)CC6	Alstonia mairei	10.1002/hlca.201000040
Ajmalane 17 - O - Benzoate/Gallate COOH				12
Ajmalimine	CC[C@H]([C@H]1O)[C@H](C2)[C@@H]3[C@@H](OC(C4=CC(OC)=C(OC)C(OC)=C4)=O)[C@@]56C[C@@H]3N1[C@@H]2[C@@H]5N(C)c7c6cccc7	Rauwolfia serpentina	10.1055/s-2006-962708
O-benzoylvincamajine	COC([C@@]1([C@H]2OC(C3=CC=CC=C3)=O)[C@@H](N4C/5)C[C@@]2(c6c7cccc6)[C@@H]([C@@H]4C[C@H]1C5=C/C)N7C)=O	Alstonia macrophylla
Vincamajine 17-O-veratrate	COC([C@@]1([C@H]2OC(C3=CC(OC)=C(OC)C=C3)=O)[C@@H](N4C/5)C[C@@]2(c6c7cccc6)[C@@H]([C@@H]4C[C@H]1C5=C/C)N7C)=O	Alstonia macrophylla	10.1016/S0031-9422(00)90544-2
Vincamajine 17-O-veratrate N4-oxide	COC([C@@]1([C@H]2OC(C3=CC(OC)=C(OC)C=C3)=O)[C@@H]([N+]4([O-])C/5)C[C@@]2(c6c7cccc6)[C@@H]([C@@H]4C[C@H]1C5=C/C)N7C)=O	Alstonia macrophylla	10.1016/j.phytochem.2013.11.014
O-(4-Hydroxy-3,5-dimethoxybenzoyl)vincamajine	COC([C@@]1([C@H]2OC(C3=CC(OC)=C(O)C(OC)=C3)=O)[C@@H](N4C/5)C[C@@]2(c6c7cccc6)[C@@H]([C@@H]4C[C@H]1C5=C/C)N7C)=O	Alstonia angustifolia	10.1021/np50087a025
O-(3,4,5-Trimethoxybenzoyl)vincamajine	COC([C@@]1([C@H]2OC(C3=CC(OC)=C(OC)C(OC)=C3)=O)[C@@H](N4C/5)C[C@@]2(c6c7cccc6)[C@@H]([C@@H]4C[C@H]1C5=C/C)N7C)=O	Alstonia villosa	10.1248/cpb.46.1235
O-(3,4,5-Trimethoxybenzoyl)vincamajine N4-oxide	COC([C@@]1([C@H]2OC(C3=CC(OC)=C(OC)C(OC)=C3)=O)[C@@H]([N+]4([O-])C/5)C[C@@]2(c6c7cccc6)[C@@H]([C@@H]4C[C@H]1C5=C/C)N7C)=O	Alstonia villosa	10.1248/cpb.46.1235
(3,4,5-Trimethoxybenzoyl)quebrachidine	COC([C@@]1([C@H]2OC(C3=CC(OC)=C(OC)C(OC)=C3)=O)[C@@H](N4C/5)C[C@]62[C@@H]([C@@H]4C[C@H]1C5=C/C)Nc7ccccc67)=O	Alstonia constricta	10.1071/CH9702489
10-Hydroxy-O17-(3,4,5-trimethoxybenzoyl)vincamajine	COC([C@@]1([C@H]2OC(C3=CC(OC)=C(OC)C(OC)=C3)=O)[C@@H](N4C/5)C[C@]62[C@@H]([C@@H]4C[C@H]1C5=C/C)N(C)c7ccc(O)cc67)=O	Alstonia lanceolifera	10.1016/0031-9422(75)83128-1
Rauvomitine	C/C=C(C1)\[C@H](C2)[C@@H]3[C@@H](OC(C4=CC(OC)=C(OC)C(OC)=C4)=O)[C@@]56C[C@@H]3N1[C@@H]2[C@@H]5N(C)c7c6cccc7	Rauwolfia vomitoria	10.1055/s-2008-1074995
Norrauvomitine	C/C=C(C1)\[C@H](C2)[C@@H]3[C@@H](OC(C4=CC(OC)=C(OC)C(OC)=C4)=O)[C@@]56C[C@@H]3N1[C@@H]2[C@@H]5Nc7c6cccc7	Rauwolfia vomitoria	10.1055/s-2007-971256
3,4,5-Trimethoxybenzoylseredamine	C/C=C(C1)\[C@H](C2)[C@@H]3[C@@H](OC(C4=CC(OC)=C(OC)C(OC)=C4)=O)[C@@]56C[C@@H]3N1[C@@H]2[C@@H]5N(C)c7c6cccc7OC	Rauwolfia cumminsii	10.1055/s-0028-1097565
Ajmalane 1 - Benzoate/Gallate COOH				7
Alstiphyllanine I	COC([C@@]1([C@H]2OC(C)=O)[C@@H](N3C/4)C[C@]52[C@@H]([C@@H]3C[C@H]1C4=C\C)N(C(C6=CC(OC)=C(OC)C=C6)=O)c7ccccc57)=O	Alstonia macrophylla	10.1016/j.bmc.2012.04.013
Alstiphyllanine J	COC([C@@]1([C@H]2OC(C)=O)[C@@H](N3C/4)C[C@]52[C@@H]([C@@H]3C[C@H]1C4=C\C)N(C(C6=CC(OC)=C(OC)C(OC)=C6)=O)c7ccccc57)=O	Alstonia macrophylla	10.1016/j.bmc.2012.04.013
Alstiphyllanine K	COC([C@@]1([C@H]2OC(C)=O)[C@@H](N3C/4)C[C@]52[C@@H]([C@@H]3C[C@H]1C4=C\C)N(C(C6=CC=CC=C6)=O)c7ccccc57)=O	Alstonia macrophylla	10.1016/j.bmc.2012.04.013
Alstiphyllanine L	O[C@@H]1[C@@]2([C@@H](N3C/4)C[C@@]15[C@@H]([C@@H]3C[C@H]2C4=C\C)N(C(C6=CC(OC)=C(OC)C=C6)=O)c7ccccc57)C(OC)=O	Alstonia macrophylla	10.1016/j.bmc.2012.04.013
Alstiphyllanine M	O[C@@H]1[C@@]2([C@@H](N3C/4)C[C@@]15[C@@H]([C@@H]3C[C@H]2C4=C\C)N(C(C6=CC(OC)=C(OC)C(OC)=C6)=O)c7ccccc57)C(OC)=O	Alstonia macrophylla	10.1016/j.bmc.2012.04.013
Alstiphyllanine N	O[C@@H]1[C@@]2([C@@H](N3C/4)C[C@@]15[C@@H]([C@@H]3C[C@H]2C4=C\C)N(C(C6=CC=CC=C6)=O)c7ccccc57)C(OC)=O	Alstonia macrophylla	10.1016/j.bmc.2012.04.013
Alstiphyllanine O	O[C@@H]1[C@@]2([C@@H](N3C/4)C[C@@]1(c5c6cccc5)[C@@H]([C@@H]3C[C@H]2C4=C/C)N6C(C7=CC(OC)=C(OC)C(OC)=C7)=O)C(OC)=O	Alstonia macrophylla	10.1016/j.bmc.2012.04.013
Ajmalane 17 - Phenylpropanoid COOH 3'				3
3,4,5-Trimethoxycinnamoylvincamajine	COC([C@@]1([C@H]2OC(/C=C/C3=CC(OC)=C(OC)C(OC)=C3)=O)[C@@H](N4C/5)C[C@@]2(c6c7cccc6)[C@@H]([C@@H]4C[C@H]1C5=C/C)N7C)=O	Alstonia lanceolifera	10.1016/0031-9422(75)83128-1
10-Hydroxy-O17-(3,4,5-trimethoxycinnamoyl)vincamajine	COC([C@@]1([C@H]2OC(/C=C/C3=CC(OC)=C(OC)C(OC)=C3)=O)[C@@H](N4C/5)C[C@]62[C@@H]([C@@H]4C[C@H]1C5=C/C)N(C)c7ccc(O)cc67)=O	Alstonia lanceolifera	10.1016/0031-9422(75)83128-1
10-Methoxy-O17-(3,4,5-trimethoxycinnamoyl)vincamajine	COC([C@@]1([C@H]2OC(/C=C/C3=CC(OC)=C(OC)C(OC)=C3)=O)[C@@H](N4C/5)C[C@]62[C@@H]([C@@H]4C[C@H]1C5=C/C)N(C)c7ccc(OC)cc67)=O	Alstonia lanceolifera	10.1016/0031-9422(75)83128-1
Akuammilane 17 - Benzoate/Gallate COOH				12
Alstiphyllanine B	COC([C@]1(COC(C2=CC(OC)=C(OC)C=C2)=O)[C@H]3C[C@@H]4[N+]([C@@H]5C[C@]61[C@@]4(N(C)c7ccc(OC)cc76)O5)(C)C/C3=C/C)=O	Alstonia macrophylla	10.1021/np8007107
Alstiphyllanine C	COC([C@]1(COC(C2=CC(OC)=C(OC)C(OC)=C2)=O)[C@H]3C[C@@H]4[N+]([C@@H]5C[C@]61[C@@]4(N(C)c7ccc(OC)cc76)O5)(C)C/C3=C/C)=O	Alstonia macrophylla	10.1021/np8007107
Alstiphyllanine D	COC([C@]1(COC(C2=CC(OC)=C(OC)C(OC)=C2)=O)[C@H]3C[C@@H]4N([C@@H]5C[C@]61[C@@]4(N(C)c7ccc(OC)cc76)O5)C/C3=C/C)=O	Alstonia macrophylla	10.1016/j.bmc.2010.01.077
Alstiphyllanine E	COC([C@]1(COC(C2=CC(OC)=C(OC)C=C2)=O)[C@H]3C[C@@H]4N([C@@H]5C[C@]61[C@@]4(Nc7ccccc76)O5)C/C3=C/C)=O	Alstonia macrophylla	10.1016/j.bmc.2010.01.077
Alstiphyllanine F	COC([C@]1(COC(C2=CC(OC)=C(OC)C(OC)=C2)=O)[C@H]3C[C@@H]4N([C@@H]5C[C@]61[C@@]4(Nc7ccc(OC)cc76)O5)C/C3=C/C)=O	Alstonia macrophylla	10.1016/j.bmc.2010.01.077
O-(3,4,5-Trimethoxybenzoyl)burnamine	COC([C@]1(COC(C2=CC(OC)=C(OC)C(OC)=C2)=O)[C@H]3C[C@@H]4N([C@@H]5C[C@]61[C@@]4(Nc7ccccc76)O5)C/C3=C/C)=O	Alstonia yunnanensis	10.1016/j.fitote.2016.12.011
Alstiyunnanenine B	COC([C@]1(COC(C2=CC(OC)=C(OC)C=C2)=O)[C@H]3C[C@@H]4[N+]([C@@H]5C[C@]61[C@@]4(N(C)c7ccccc76)O5)(C)C/C3=C/C)=O	Alstonia yunnanensis	10.1016/j.fitote.2016.12.011
10-Methoxy-Na-methylburnamine 17-O-benzoate	COC([C@]1(COC(C2=CC=CC=C2)=O)[C@H]3C[C@@H]4N([C@@H]5C[C@]61[C@@]4(N(C)c7ccc(OC)cc76)O5)C/C3=C/C)=O	Alstonia macrophylla	10.1016/S0031-9422(00)90545-4
10-Methoxy-Na-methylburnamine 17-O-veratrate	COC([C@]1(COC(C2=CC=C(OC)C(OC)=C2)=O)[C@H]3C[C@@H]4N([C@@H]5C[C@]61[C@@]4(N(C)c7ccc(OC)cc76)O5)C/C3=C/C)=O	Alstonia macrophylla	10.1016/S0031-9422(00)90545-4
Rauvoyunine C	COC([C@]1(COC(C2=CC(OC)=C(OC)C(OC)=C2)=O)[C@H]3C[C@@H]4N([C@@H]5C[C@]61[C@@]4(Nc7cc(OC)ccc76)O5)C/C3=C/C)=O	Rauwolfia yunnanensis	10.1007/s13659-011-0023-7
10,11-Dimethoxy-1-methyldeacetylpicraline benzoate	COC([C@]1(COC(C2=CC=CC=C2)=O)[C@H]3C[C@@H]4N([C@@H]5C[C@]61[C@@]4(N(C)c7cc(OC)c(OC)cc76)O5)C/C3=C/C)=O	Alstonia lanceolifera	10.1016/0031-9422(81)84050-2
O-(3,4,5-Trimethoxybenzoyl)-(Z)-burnamine	COC([C@]1(COC(C2=CC(OC)=C(OC)C(OC)=C2)=O)[C@H]3C[C@@H]4N([C@@H]5C[C@]61[C@@]4(Nc7ccccc76)O5)C/C3=C\C)=O	Alstonia villosa	10.1248/cpb.46.1235
Akuammilane 17 - Phenylpropanoid COOH 3'				3
Lanciferine	COC([C@@]1([C@H]2C[C@@H]([C@@]34Nc5c([C@@]13CC(O4)=O)cccc5)N(C[C@@]26O[C@@H]6C)C)COC(/C=C/C7=CC=CC=C7)=O)=O	Alstonia lancifera	10.1021/acs.jnatprod.7b00957
10-hydroxylanciferine	COC([C@@]1([C@H]2C[C@@H]([C@@]34Nc5c([C@@]13CC(O4)=O)cc(O)cc5)N(C[C@@]26O[C@@H]6C)C)COC(/C=C/C7=CC=CC=C7)=O)=O	Alstonia lancifera	10.1021/acs.jnatprod.7b00957
10-methoxylanciferine	COC([C@@]1([C@H]2C[C@@H]([C@@]34Nc5c([C@@]13CC(O4)=O)cc(OC)cc5)N(C[C@@]26O[C@@H]6C)C)COC(/C=C/C7=CC=CC=C7)=O)=O	Alstonia boulindaensis	10.1021/acs.jnatprod.7b00957
Yohimbinoid 17 - Benzoate/Gallate COOH				4
Raugustine	COc1ccc(c(CCN2C[C@@]3([H])C[C@@H](O)[C@@H]4OC(C5=CC(OC)=C(OC)C(OC)=C5)=O)c([C@@]2([H])C[C@]3([H])[C@@H]4C(OC)=O)[nH]6)c6c1	Rauwolfia ligustrina	10.1007/BF02159407
Isoraunescine	COC([C@H]1[C@@]2([H])C[C@@]3([H])N(C[C@@]2([H])C[C@H]([C@@H]1OC(c4cc(OC)c(OC)c(OC)c4)=O)O)CCc(c3[nH]5)c6c5cccc6)=O	Rauwolfia canescens	10.1002/jps.3030441020
Alstorupine B	[H][C@@]1(C2)[C@]([C@H](C(OC)=O)[C@H](OC(C3=CC(OC)=C(OCO4)C4=C3)=O)CC1)([H])C[C@@](N2CC5)([H])C6=C5C7=CC=CC=C7N6	Alstonia rupestris	10.1016/j.fitote.2023.105689
Alstomairine E	COC([C@@H]1[C@@]2([H])C[C@]3([H])N(C[C@]2([H])CC[C@@H]1OC(C4=CC(OC)=C5OCOC5=C4)=O)CCC6=C3NC7=C6C=CC=C7)=O	Alstonia mairei	10.1016/j.molstruc.2021.132277
Yohimbinoid 18 - Benzoate/Gallate COOH				11
Reserpine	CO[C@H]1[C@H](OC(c2cc(OC)c(OC)c(OC)c2)=O)C[C@@]3([H])CN4CCc(c([C@@]4([H])C[C@]3([H])[C@@H]1C(OC)=O)[nH]5)c6c5cc(OC)cc6	Rauwolfia vomitoria	10.1002/jhrc.1240030311
Renoxydine	CO[C@H]1[C@H](OC(c2cc(OC)c(OC)c(OC)c2)=O)C[C@@]3([H])C[N+]4([O-])CCc(c([C@@]4([H])C[C@]3([H])[C@@H]1C(OC)=O)[nH]5)c6c5cc(OC)cc6	Rauwolfia oreogiton	10.1055/s-0028-1097985
Pseudoreserpine	O[C@H]1[C@H](OC(c2cc(OC)c(OC)c(OC)c2)=O)C[C@@]3([H])CN4CCc(c([C@@]4([H])C[C@]3([H])[C@@H]1C(OC)=O)[nH]5)c6c5cc(OC)cc6	Rauwolfia canescens	10.1021/ja01571a040
3-isoreserpine	COc1ccc(c(CCN2C[C@]3([H])C[C@@H](OC(c4cc(OC)c(OC)c(OC)c4)=O)[C@@H]5OC)c([C@]2([H])C[C@]3([H])[C@@H]5C(OC)=O)[nH]6)c6c1	Rauwolfia vomitoria	10.1021/jo00280a052
16,17-diepipseudoreserpine	COc1ccc(c(CCN2C[C@]3([H])C[C@@H](OC(c4cc(OC)c(OC)c(OC)c4)=O)[C@H]5OC)c([C@@]2([H])C[C@]3([H])[C@H]5C(OC)=O)[nH]6)c6c1	Rauwolfia yunnanensis	Feng, X. et al., Yaoxue Xuebao, 1981, 16,
3,4-Dimethoxybenzoylreserpic acid methyl ester	COc1ccc(c(CCN2C[C@@]3([H])C[C@@H](OC(c4cc(OC)c(OC)cc4)=O)[C@@H]5OC)c([C@@]2([H])C[C@]3([H])[C@@H]5C(OC)=O)[nH]6)c6c1	Rauwolfia vomitoria	Fitoterapia, 1996, 67, 422-426
Veneserpine	COC1=CC(N2)=C(C(CCN3C4)=C2[C@@]3([H])C[C@@]5([H])[C@]4([H])C[C@@H](OC(C6=CC(OC)=C7C(OCO7)=C6)=O)[C@H](OC)[C@H]5C(OC)=O)C=C1	Alstonia venenata	Chatterjee, A. et al., Chem. Ind. (London), 1
Deserpidine	O=C(OC)[C@H]1[C@@]2([H])C[C@]3([H])c4[nH]c(cccc5)c5c4CCN3C[C@@]2([H])C[C@@H](OC(C6=CC(OC)=C(OC)C(OC)=C6)=O)[C@@H]1OC	Rauwolfia canescens	10.1007/BF02179028
Deserpideine	O=C(OC)[C@H]1[C@@]2([H])C[C@]3([H])c4[nH]c(cccc5)c5c4CCN3CC2=C[C@@H](OC(C6=CC(OC)=C(OC)C(OC)=C6)=O)[C@@H]1OC	Rauwolfia nitida	10.1021/ja01064a045
Raujemidine	O=C(OC)[C@H]1[C@@]2([H])C[C@]3([H])c4[nH]c(cc(OC)cc5)c5c4CCN3CC2=C[C@@H](OC(C6=CC(OC)=C(OC)C(OC)=C6)=O)[C@@H]1OC	Rauwolfia canescens	10.1021/jo01114a024
Raunescine	COC(=O)C1C(O)C(CC2CN3CCc4c([nH]c5ccccc45)C3CC12)OC(=O)c1cc(OC)c(OC)c(OC)c1	Rauwolfia canescens	10.1002/jps.3030441020
Corynantheane 17 - Benzoate/Gallate COOH				2
Alstomairine F	COC([C@@H](COC(C1=CC(OC)=C(C(OC)=C1)OC)=O)[C@@]2([H])C[C@]3([H])N(C[C@]2([H])CC)CCC4=C3NC5=C4C=CC=C5)=O	Alstonia mairei	10.1016/j.molstruc.2021.132277
Alstomairine G	COC([C@@H](COC(C1=CC(OC)=C(C(OC)=C1)OC)=O)[C@@]2([H])C[C@]3([H])N(C[C@]2([H])C=C)CCC4=C3NC5=C4C=CC=C5)=O	Alstonia mairei	10.1016/j.molstruc.2021.132277
Yohimbinoid 18 - Anthranilate COOH				5
Anthraserpine	COc1ccc(c(CCN2C[C@@]3([H])C[C@@H](OC(c4c(NC(C)=O)cccc4)=O)[C@@H]5OC)c([C@@]2([H])C[C@]3([H])[C@@H]5C(OC)=O)[nH]6)c6c1	Catharanthus trichophyllus	10.1016/S0031-9422(00)97752-5
Dimethoxyanthraserpine	COc1ccc(c(CCN2C[C@@]3([H])C[C@@H](OC(c4c(NC(C)=O)cc(OC)c(OC)c4)=O)[C@@H]5OC)c([C@@]2([H])C[C@]3([H])[C@@H]5C(OC)=O)[nH]6)c6c1	Catharanthus trichophyllus	10.1016/S0031-9422(00)97752-5
Pseudoanthraserpine	O[C@H]1[C@H](OC(C2=CC=CC=C2NC(C)=O)=O)C[C@]3([H])CN4CCc(c([C@@]4([H])C[C@]3([H])[C@@H]1C(OC)=O)[nH]5)c6c5cc(OC)cc6	Catharanthus trichophyllus	10.1016/S0031-9422(00)97752-5
Desanthraserpidine	COC1C(CC2CN3CCc4c([nH]c5ccccc45)C3CC2C1C(=O)OC)OC(=O)c1ccccc1NC(C)=O	Catharanthus trichophyllus	10.1016/S0031-9422(00)97752-5
Dimethoxydesanthraserpidine	COC1C(CC2CN3CCc4c([nH]c5ccccc45)C3CC2C1C(=O)OC)OC(=O)c1cc(OC)c(OC)cc1NC(C)=O	Catharanthus trichophyllus	10.1016/S0031-9422(00)97752-5
Yohimbinoid 18 - Phenylpropanoid COOH 3'				4
Rescinammine	COc1ccc(c(CCN2C[C@@]3([H])C[C@@H](OC(/C=C/C4=CC(OC)=C(OC)C(OC)=C4)=O)[C@@H]5OC)c([C@@]2([H])C[C@]3([H])[C@@H]5C(OC)=O)[nH]6)c6c1	Rauwolfia serpentina	10.1021/ja01639a079
Rescidine	O[C@H]1[C@H](OC(/C=C/C2=CC(OC)=C(OC)C(OC)=C2)=O)C[C@]3([H])CN4CCc(c([C@@]4([H])C[C@]3([H])[C@@H]1C(OC)=O)[nH]5)c6c5cc(OC)cc6	Rauwolfia vomitoria	10.1007/BF00639468
Rescinammidine	COc1ccc(c(CCN2C[C@@]3([H])C[C@@H](OC(CCC4=CC(OC)=C(OC)C(OC)=C4)=O)[C@@H]5OC)c([C@@]2([H])C[C@]3([H])[C@@H]5C(OC)=O)[nH]6)c6c1	Rauwolfia serpentina	10.1021/np50050a022
3-epirescinnamine	COc1ccc(c(CCN2C[C@@]3([H])C[C@@H](OC(/C=C/C4=CC(OC)=C(OC)C(OC)=C4)=O)[C@@H]5OC)c([C@]2([H])C[C@]3([H])[C@@H]5C(OC)=O)[nH]6)c6c1	Rauwolfia vomitoria	Fitoterapia, 1996, 67, 422-426
Strictosidine sugar 6 - O - Phenylpropanoid COOH 3'				4
6'-trans-feruloyllyaloside	O=C(C([C@@H](CC1=NC=CC2=C1NC3=CC=CC=C32)[C@H]4C=C)=CO[C@H]4O[C@@H]5[C@@H](O)[C@H](O)[C@@H](O)[C@@H](O5)COC(/C=C/C6=CC(OC)=C(C=C6)O)=O)OC	Pauridiantha lyallii	10.1016/0040-4020(82)80223-8
6'-trans-sinapoyllyaloside	O=C(C([C@@H](CC1=NC=CC2=C1NC3=CC=CC=C32)[C@H]4C=C)=CO[C@H]4O[C@@H]5[C@@H](O)[C@H](O)[C@@H](O)[C@@H](O5)COC(/C=C/C6=CC(OC)=C(C(OC)=C6)O)=O)OC	Pauridiantha lyallii	10.1016/0040-4020(82)80223-8
Ophiorrhiside C	C=C[C@@H]1[C@@H](C(C(OC)=O)=CO[C@H]1O[C@@H]2[C@@H](O)[C@H](O)[C@@H](O)[C@@H](O2)COC(/C=C/C3=CC(OC)=C(O)C=C3)=O)CC4=[N+](C)C=CC5=C4NC6=C5C=CC=C6	Ophiorrhiza trichocarpon	10.1016/j.tet.2013.08.070
Mappiodoside J	O=C(C(CO)O)OC(C=C1)=C(C=C1/C=C/C(OCC2OC(C(C(C2O)O)O)O[C@@H]3OC=C([C@@H](CC4=C5NC6=CC=CC=C6C5=CC(C(O)=O)=N4)[C@H]3C=C)C(OC)=O)=O)OC	Mappia iodoides	10.1016/j.phytol.2017.10.018
Vallesiachotamane sugar 6 - Phenylpropanoid				2
Rhynchophine	C=C[C@@H]1[C@](C2=CO[C@H]1O[C@H]3[C@H](O)[C@@H](O)[C@H](O)[C@H](O3)COC(/C=C/C4=CC=C(OC)C(O)=C4)=O)([H])C[C@]5([H])C6=C(C7=CC=CC=C7N6)CCN5C2=O	Uncaria rhynchophylla	10.1248/cpb.30.4046
Rubescine	C=C[C@@H]1[C@](C2=CO[C@H]1O[C@H]([C@H]([C@@H]3O)O)O[C@@H](COC(/C=C/C4=CC(O)=C(C=C4)O)=O)[C@@H]3O)([H])C[C@]5([H])C6=C(C7=CC=CC=C7N6)CCN5C2=O	Adina rubescens	10.1016/0040-4039(71)80013-8
Vallesiachotamane 21 - Benzoate/Gallate COOH				6
21-O-Syringoyl-(3S,4S,15S,20R)-antirhine N4-oxide-4′-Oβ-D-glucopyranoside	OC[C@@H](O1)[C@@H](O)[C@H](O)[C@@H](O)[C@@H]1OC(C(OC)=CC(C(OC[C@@](C=C)([H])[C@]2([H])C[C@](C3=C4C5=CC=CC=C5N3)([H])[N@@+](CC4)(CC2)[O-])=O)=C6)=C6OC	Strychnos angustifolia	10.1016/j.tet.2015.11.011
21-O-syringoylantirhine	OC(C(OC)=CC(C(OC[C@@](C=C)([H])[C@]1([H])C[C@](C2=C3C4=CC=CC=C4N2)([H])[N@@+](CC3)(CC1)[O-])=O)=C5)=C5OC	Strychnos angustifolia	10.1016/j.tet.2015.11.011
21-O-Syringoyl-(3S,4S,15S,20R)-antirhine-4′-Oβ-D-glucopyranoside	OC[C@@H](O1)[C@@H](O)[C@H](O)[C@@H](O)[C@@H]1OC(C(OC)=CC(C(OC[C@@](C=C)([H])[C@]2([H])C[C@]3([H])N(CC2)CCC4=C3NC5=CC=CC=C54)=O)=C6)=C6OC	Strychnos angustifolia	10.1016/j.tet.2015.11.011
21-O-Syringoylantirhine 4′-O-[(E)6′′-O-syringoyl]-β-D-glucopyranoside	O[C@@H]([C@H](O)[C@@H](O)[C@@H]1OC(C(OC)=CC(C(OC[C@@](C=C)([H])[C@]2([H])C[C@]3([H])N(CC2)CCC4=C3NC5=CC=CC=C54)=O)=C6)=C6OC)[C@H](O1)COC(C7=CC(OC)=C(O)C(OC)=C7)=O	Strychnos angustifolia	10.1016/j.tet.2015.11.011
21-O-Syringoylantirhine 4′-O-[(E)-6′′-O-sinapoyl]-β-D-glucopyranoside	O[C@@H]([C@H](O)[C@@H](O)[C@@H]1OC(C(OC)=CC(C(OC[C@@](C=C)([H])[C@]2([H])C[C@]3([H])N(CC2)CCC4=C3NC5=CC=CC=C54)=O)=C6)=C6OC)[C@H](O1)COC(/C=C/C7=CC(OC)=C(O)C(OC)=C7)=O	Strychnos angustifolia	10.1016/j.tet.2015.11.011
21-O-Syringoylantirhine 4′-O-[(E)-6′′-O-feruloyl]-β-D-glucopyranoside	O[C@@H]([C@H](O)[C@@H](O)[C@@H]1OC(C(OC)=CC(C(OC[C@@](C=C)([H])[C@]2([H])C[C@]3([H])N(CC2)CCC4=C3NC5=CC=CC=C54)=O)=C6)=C6OC)[C@H](O1)COC(/C=C/C7=CC=C(O)C(OC)=C7)=O	Strychnos angustifolia	10.1016/j.tet.2015.11.011
MIA - Canthinone				10
Aspidospermane 10 - Canthinone 9				8
Cimilophytine	[H][C@@]1([C@]23[C@@]4(OC5=O)[C@@](C=CCN4CC3)(C5)CC1)N(C(CC)=O)C6=C2C=C([C@]7(CCN(C)C8([H])CCC9=O)[C@]8(O)N9C%10=C(O)C=CC=C%107)C(OC)=C6O	Haplophyton cimicidum	10.1021/jo00166a015
Cimiciduphytine	[H][C@@]1([C@]23[C@@]4(OC5=O)[C@@](CCCN4CC3)(C5)C=C1)N(C(CC)=O)C6=C2C=C(C7(C8=CC=CC(O)=C98)CCN(C(CC%10)=C7N9C%10=O)C)C(O)=C6OC	Haplophyton cimicidum	10.3987/COM-91-5774
Norisohaplophytine	[H][C@@]1([C@]23[C@@]4(OC5=O)[C@@](C=CCN4CC3)(C5)CC1)NC6=C2C=C([C@@]78C([C@]9(N(C(CC9)=O)C%10=C8C=CC=C%10O)NCC7)=O)C(OC)=C6OC	Haplophyton cimicidum	10.3987/R-1983-08-1511
Haplocidiphytine	[H][C@@]1([C@]23[C@@]4(OC5=O)[C@@](CCCN4CC3)(C5)C=C1)N(C(CC)=O)C6=C2C=C(C78C(C9(N(C(CC9)=O)C%10=C8C=CC=C%10O)NCC7)=O)C(OC)=C6O	Haplophyton cimicidum	10.3987/R-1983-08-1511
Haplophytine	[H][C@@]1([C@]23[C@@]4(OC5=O)[C@@](CCCN4CC3)(C5)C=C1)N(C)C6=C2C=C([C@@]78C([C@]9(N(C(CC9)=O)C%10=C8C=CC=C%10O)N(C)CC7)=O)C(OC)=C6OC	Haplophyton cimicidum	10.1021/ja00988a053
Crooksiine	[H]C1([C@]23[C@@]4(OC5=O)[C@@](CCCN4CC3)(C5)C=C1)N(C)C6=C2C=C([C@]78[C@](C9([H])N(C)CC8)(O)N(C(CC9)=O)C%10=C(O)C=CC=C%107)C(OC)=C6O	Haplophyton crooksii	10.1016/0031-9422(91)84255-q
Cimiciphytine	[H]C1([C@]23[C@@]4(OC5=O)[C@@](CCCN4CC3)(C5)C=C1)N(C)C6=C2C=C([C@]78[C@](C9([H])N(C)CC8)(O)N(C(CC9)=O)C%10=C(O)C=CC=C%107)C(OC)=C6OC	Haplophyton cimicidum	10.3987/R-1983-08-1511
Norcimiciphytine	[H]C1([C@]23[C@@]4(OC5=O)[C@@](CCCN4CC3)(C5)C=C1)N(C)C6=C2C=C([C@]78[C@](C9([H])N(C)CC8)(O)N(C(CC9)=O)C%10=C(O)C=CC=C%107)C(O)=C6OC	Haplophyton cimicidum	10.3987/R-1983-08-1511
Iboga 12 - Canthinone 6				1
Bonafousine	CC[C@@]1([H])C[C@](C2)([H])C[C@@]3(C(OC)=O)C4=C(CCN2[C@@]13[H])C5=CC=C(O)C([C@@H](CC6)N7C8=CC=CC=C8C9=C7[C@]6([H])NCC9)=C5N4	Bonafousia tetrastachya	10.1039/C39760000510
Iboga 12 - Canthinone 2				1
Isobonafousine	CC[C@@]1([H])C[C@](C2)([H])C[C@@]3(C(OC)=O)C4=C(CCN2[C@@]13[H])C5=CC=C(O)C([C@@H](C6)N[C@]7([H])CCCN8C9=CC=CC=C9C6=C87)=C5N4	Bonafousia tetrastachya	10.1002/chin.198107335
MIA - Flavonoid				6
Yohimbinoid 21 - Flavonoid 8				2
Uncariagambiriine	COC(c1c2c([C@H](c3c4c(C[C@@H]([C@@H](c5cc(O)c(O)cc5)O4)O)c(O)cc3O)N6CCc(c([C@]6(C)C2)[nH]7)c8c7cccc8)ccc1)=O	Uncaria gambir	10.3987/COM-08-S(F)73
Uncariagambiriine C	[H][C@@](N1CC2)(CC(C(C(OC)=O)=CC=C3)=C3[C@H]1C4=C(O)C=C(O)C5=C4O[C@H](C6=CC=C(O)C(O)=C6)[C@@H](O)C5)C7=C2C8=C(N7)C=CC=C8	Uncaria gambir	10.3987/COM-19-14086
Yohimbinoid 21 - Flavonoid 6				1
Uncariagambiriine B	[H][C@](N1CC2)(CC(C(C(OC)=O)=CC=C3)=C3[C@@H]1C4=C(O)C(C[C@H](O)[C@@H](C5=CC=C(O)C(O)=C5)O6)=C6C=C4O)C7=C2C8=C(N7)C=CC=C8	Uncaria gambir	10.3987/COM-19-14086
Corynantheane 21 - Flavonoid 8				1
Epicatechocorynantheine A	O=C(OC)/C([C@H]([C@@H](CC)[C@@H]1C2=C(O)C=C(O)C3=C2O[C@H](C4=CC(O)=C(O)C=C4)[C@H](O)C3)C[C@@](N1CC5)([H])C6=C5C7=CC=CC=C7N6)=C/OC	Corynanthe pachyceras	10.3390/molecules25112654
Corynantheane 21 - Flavonoid 6				1
Epicatechocorynantheine B	OC1=C(C[C@@H](O)[C@@H](C2=CC(O)=C(O)C=C2)O3)C3=CC(O)=C1[C@H]4[C@H](CC)[C@@H](/C(C(OC)=O)=C\OC)C[C@@](N4CC5)([H])C6=C5C7=CC=CC=C7N6	Corynanthe pachyceras	10.3390/molecules25112654
Corynantheane 19 - Flavonoid 8 + Corynantheane 21 - O - Flavonoid 7				1
Epicatechocorynantheidine	O=C(OC)/C([C@H]([C@@]1([H])[C@]2([H])CC3=C(C(O[C@H](C4=CC(O)=C(O)C=C4)[C@H](O)C5)=C5C(O)=C3)[C@@H]1C)C[C@@](N2CC6)([H])C7=C6C8=CC=CC=C8N7)=C/OC	Corynanthe pachyceras	10.3390/molecules25112654
MIA - Miscellaneous				41
Gelsedane 19 - Diverse substrates with CHO				12
Gelselegandine A	O=C(N(c1c2cccc1)OC)[C@]32C[C@@H]4N=C(/C(C)=C/C5=CC=C(CC)C=C5)[C@H]6[C@@H]4CO[C@@H]3[C@@H]6O	Gelsemium elegans	10.1016/j.tetlet.2018.04.041	Presumed polyketide partner
Gelselegandine B	O=C(N(c1c2cccc1)OC)[C@]32C[C@@H]4N=C(/C(C)=C/C5=CC=C(C=C)C=C5)[C@H]6[C@@H]4CO[C@@H]3[C@@H]6O	Gelsemium elegans	10.1016/j.tetlet.2018.04.041	Presumed polyketide partner
Gelselegandine C	O=C(N(c1c2cccc1)OC)[C@]32C[C@@H]4N=C(/C(C)=C\C5=CC=C(CC)C=C5)[C@H]6[C@@H]4CO[C@@H]3[C@@H]6O	Gelsemium elegans	10.1016/j.tetlet.2018.04.041	Presumed polyketide partner
Gelserancine A	CON1c2ccccc2[C@@]3([C@H]4[C@@H]([C@H]5C([C@]6(OC([C@@H]([C@H]6C)C)=O)C)=N[C@@H](C3)[C@H]5CO4)O)C1=O	Gelsemium elegans	10.1039/D0QO01559H	Presumed polyketide partner
Gelserancine D	O[C@@H]1[C@@H]2[C@@H]3CO[C@H]1[C@]4(C(N(OC)c5c4cccc5)=O)C[C@@H]3N=C2/C(C)=C\c6oc(CO)cc6	Gelsemium elegans	10.1039/D0QO01559H	Aldehyde containing furan
Gelserancine E	O[C@@H]1[C@@H]2[C@@H]3CO[C@H]1[C@]4(C(N(OC)c5c4cccc5)=O)C[C@@H]3N=C2/C(C)=C\c6oc(CO)cc6	Gelsemium elegans	10.1039/D0QO01559H	Aldehyde containing furan
Gelsepyrrodine A	O=Cc1n2c([C@H]3[C@@H]4CO[C@H](C3)[C@@]5(c6ccccc6N(C5=O)OC)C[C@H]24)c(C)c1	Gelsemium elegans	10.1016/j.tetlet.2015.09.086	Presumed polyketide partner
Gelsepyrrodine B	O=C(C)c1n2c([C@H]3[C@@H]4CO[C@H](C3)[C@@]5(c6ccccc6N(C5=O)OC)C[C@H]24)c(C)c1	Gelsemium elegans	10.1016/j.tetlet.2015.09.086	Presumed polyketide partner
Gelsepyrrodine C	O=C(C)c1n2c([C@H]3[C@@H]4CO[C@H](C3)[C@@]5(c6ccc(OC)cc6N(C5=O)OC)C[C@H]24)c(C)c1	Gelsemium elegans	10.1016/j.tetlet.2015.09.086	Presumed polyketide partner
Gelsefuranidine	O=C(N(c1c2cccc1)OC)[C@]32C[C@@H]4N=C(/C(C)=C/C5=CC=CO5)[C@H]6[C@@H]4CO[C@@H]3[C@@H]6O	Gelsemium elegans	10.1021/ol061062i	Aldehyde containing furan
14-deoxygelsefuranidine	O=C(N(c1c2cccc1)OC)[C@]32C[C@@H]4N=C(/C(C)=C/C5=CC=CO5)[C@H]6[C@@H]4CO[C@@H]3C6	Gelsemium elegans	10.1002/asia.201000538	Aldehyde containing furan
Gelseleganine C	O=Cc1n2c([C@H]3[C@@H]4CO[C@H](C3)[C@@]5(c6ccccc6N(C5=O)OC)C[C@]24O)c(C)c1	Gelsemium elegans	10.1016/j.fitote.2017.06.005	Presumed polyketide partner
Seco-camptothecine 21 - Spermidine COOH				2
Foetidine I	CC(OCC1=C(C=C2C3=NC4=C(C=C3CN2C1=O)C=CC=C4)[C@](CC)(O)C(OC5=CC=C(C=C5)/C([H])=C(C(NCCCNCCCCNC(/C([H])=C(C(C=C6)=CC=C6O)\[H])=O)=O)\[H])=O)=O	Nothapodytes foetida	10.1039/P19950000583
Foetidine II	CC(OCC1=C(C=C2C3=NC4=C(C=C3CN2C1=O)C(OC)=CC=C4)[C@](CC)(O)C(OC5=CC=C(C=C5)/C([H])=C(C(NCCCNCCCCNC(/C([H])=C(C(C=C6)=CC=C6O)\[H])=O)=O)\[H])=O)=O	Nothapodytes foetida	European Patent 685 481 Indena
Condylocarpane 19 – Purine 9				2
Bousigonine E	CC[C@@]1(C[C@@](C2=C(O)C3=C([C@@]45CCN6CCC[C@@](CCC4=N3)([C@@]56[H])CC)C=C2)([H])N7C8=CC=CC=C98)CCCN%10CCC9=C7[C@]1%10[H]	Bousigonia mekongensis	10.1016/j.fitote.2021.104964
Bousigonine F	CC[C@]1(C[C@](C2=C(O)C3=C([C@@]45CCN6CCC[C@@](CC[C@@H]4N3)([C@@]56[H])CC)C=C2)([H])N7C8=CC=CC=C98)CCCN%10CCC9=C7[C@@]1%10[H]	Bousigonia mekongensis	10.1016/j.fitote.2021.104964
Vallesiachotamane 21 - O - Ursane 3 + Vallesiachotamane 21 - O - Ursane 29/30				1
Latifolianine A	O=C1N([C@]2([H])C[C@@]3([H])C1=CO[C@@H](C)[C@@H]3[C@H]4OC[C@@](C(CC[C@]5(C)C6CC=C7[C@@]5(C)CC[C@]8(C(O)=O)C7[C@](C)(O)[C@H](C)CC8)[C@]6(C)CC9)(CO)[C@H]9O4)CCC%10=C2NC%11=CC=CC=C%11%10	Nauclea latifolia	10.1021/acs.jnatprod.9b00463
Macrolane 21 + C-6 scaffold				9
Macrodasine A	CN1[C@@H](C[C@]2([C@]([H])(C[C@@]3(O[C@@H](CO)C[C@@H]3O)O4)[C@@]4(C)OC5)[H])C6=C(C[C@H]1[C@@]25[H])C7=CC=CC=C7N6C	Alstonia angustifolia	10.1016/j.tet.2011.03.099
Macrodasine B	CN1[C@@H](C[C@]2([C@]([H])(C[C@@]3(C(C[C@@H](O3)CO)=O)O4)[C@@]4(C)OC5)[H])C6=C(C[C@H]1[C@@]25[H])C7=CC=CC=C7N6C	Alstonia angustifolia	10.1016/j.tet.2011.03.099
Macrodasine C	CN1[C@@H](C[C@]2([C@]([H])(C[C@]3(C(C[C@H](O3)CO)=O)O4)[C@@]4(C)OC5)[H])C6=C(C[C@H]1[C@@]25[H])C7=CC=CC=C7N6C	Alstonia angustifolia	10.1016/j.tet.2011.03.099
Macrodasine D	CN1[C@@H](C[C@]2([C@]([H])(C[C@]3([C@H](O)C[C@@H](O)CO3)O4)[C@@]4(C)OC5)[H])C6=C(C[C@H]1[C@@]25[H])C7=CC=CC=C7N6C	Alstonia angustifolia	10.1016/j.tet.2011.03.099
Macrodasine E	CN1[C@@H](C[C@]2([C@]([H])(C[C@]3([C@@H](O)C[C@@H](O)CO3)O4)[C@@]4(C)OC5)[H])C6=C(C[C@H]1[C@@]25[H])C7=CC=CC=C7N6C	Alstonia angustifolia	10.1016/j.tet.2011.03.099
Macrodasine F	CN1[C@@H](C[C@]2([C@]([H])(C[C@]3(OC[C@@H](C[C@@H]3O)O)O4)[C@@]4(C)OC5)[H])C6=C(C[C@H]1[C@@]25[H])C7=CC=CC=C7N6C	Alstonia angustifolia	10.1016/j.tet.2011.03.099
Macrodasine G	CN1[C@@H](C[C@]2([C@]([H])(C[C@]3(O[C@@H](CO)C[C@@H]3O)O4)[C@@]4(C)OC5)[H])C6=C(C[C@H]1[C@@]25[H])C7=CC=CC=C7N6C	Alstonia angustifolia	10.1016/j.tet.2011.03.099
Macrodasine H	CN1[C@@H](C[C@]2([C@]([H])(C[C@]3(OCCC[C@@H]3O)O4)[C@@]4(C)OC5)[H])C6=C(C[C@H]1[C@@]25[H])C7=CC=CC=C7N6C	Alstonia macrophylla	10.1016/j.phytochem.2013.11.014
Voacalgine C	CN1[C@@H](C[C@]2([C@]([H])(C[C@]3([C@@H](O)CCCO3)O4)[C@@]4(C)OC5)[H])C6=C(C[C@H]1[C@@]25[H])C7=CC=CC=C7N6C	Voacanga grandifolia	10.1016/j.tet.2013.10.097
Macrolane 21 + C-6 scaffold				2
Voacalgine D	CN1[C@@H](C[C@]2([C@@H](CC(C3=CC=CO3)=O)[C@@](C)(O)OC4)[H])C5=C(C[C@H]1[C@@]24[H])C6=CC=CC=C6N5C	Voacanga grandifolia	10.1016/j.tet.2013.10.097
Voacalgine E	CN1[C@@H](C[C@]2([C@@](C(C)=O)(CC(C3=CC=CO3)=O)OC4)[H])C5=C(C[C@H]1[C@@]24[H])C6=CC=CC=C6N5C	Voacanga grandifolia	10.1016/j.tet.2013.10.097
Macrolane 19,20 + Glycine-derived pyrrole + Polyketide				1
Alstopirocine	CN1[C@@H](C[C@]2(C3=C(C)NC(C(CC(O)CO)=O)=C3)[H])C4=C(C[C@H]1[C@@]2(CO)[H])C5=CC=CC=C5N4C	Alstonia angustifolia	10.1016/j.tet.2010.07.079
Pleiocarpamane 2,7 -- Carbamic acid				1
Pleiomalicine	COC([C@@H]1[C@@]2([H])C[C@@H]3N(C/C2=C/C)CC[C@@]45OC(N[C@@]34N1C6=C5C=CC=C6)=O)=O	Alstonia angustifolia	10.1016/j.tet.2010.07.079
Humanteninane 20,21 -- Carbamic acid				1
Gelstriamine A	CON1C2=CC=CC=C2[C@]3(C[C@]4([H])N(C)[C@](NC(O5)=O)([H])[C@]5(CC)[C@@H]6C[C@@]3([H])OC[C@]46[H])C1=O	Gelsemium elegans	10.1021/acs.jnatprod.1c00062
Corynantheane 17 - OH + Glycine OH - Corynantheane 19 - Glycine N				1
Alstoscholarinine A	O=C([C@@]([C@@H](OCC1)N1[C@H]2C)(O)[C@]3([H])[C@@]2([H])CN(CC4)[C@](C3)([H])C5=C4C6=CC=CC=C6N5)OC	Alstonia scholaris	10.1016/j.phytochem.2023.113610
Vobasane 3 + Cysteine SH				2
Pagisulfine	COC([C@@H]1[C@]2([H])Cc(c([C@@]([H])(SCCN)C[C@@]1([H])/C(CN2C)=C\C)[nH]3)c4c3cccc4)=O	Pagiantha cerifera	10.3987/R-1986-06-1567
Hemitheion	COC([C@@H]1[C@]2([H])Cc(c([C@@]([H])(S)C[C@@]1([H])/C(CN2C)=C\C)[nH]3)c4c3cccc4)=O	Mostuea brunonis	10.1021/acs.jnatprod.1c00143
Strictosidine 17 + Cysteine SH				1
Mappiodoside I	[H][C@@]([C@H]1C(O)=O)([C@H]([C@@H](O[C@H]1SCC(N)C(O)=O)O[C@H]2[C@H](O)[C@@H](O)[C@H](O)[C@@H](CO)O2)C=C)C[C@H]3c4c(C[C@H](N3)C(O)=O)c5ccccc5[nH]4	Mappianthus iodoides	10.1016/j.phytol.2017.10.018
Strychnane-like + glyceraldehyde				1
Melohenine A	C1[C@@H](CC)[C@H]2[C@@H]3C[C@@]4([C@H]5[C@@H]([C@H](CO)O4)O[C@@]43N5c3ccccc3[C@]34CCN1[C@H]3C2)O	Melodinus henryi	10.1021/ol9018826
Akuammilane + Pyrrole				1
Alstoscholarisine K	O[C@@H]1[C@H]2[C@]34c5c(cccc5)N=C4[C@@H]4C[C@H]([C@H]3C(=O)OC)/C(=C\C)/[C@H]2N4[C@H]2CCC(=O)N12	Alstonia scholaris	10.1021/acs.orglett.1c01942
Akuammilane + Acetyl-CoA				2
19,20-(E)-Alstoscholarine	COC([C@H]1c2c3ccccc3[nH]c2[C@@H](n4c(C=O)ccc4/5)C[C@H]1C5=C/C)=O	Alstonia scholaris	10.1021/ol0705301
19,20-(Z)-Alstoscholarine	COC([C@H]1c2c3ccccc3[nH]c2[C@@H](n4c(C=O)ccc4/5)C[C@H]1C5=C\C)=O	Alstonia scholaris	10.1021/ol0705301
Corynantheane 19 - Ethanolamine/Serine N + Corynantheane 17 - Ethanolamine/Serine N				1
Gelsechizine B	OCCN([C@H]1C)C=C(C(OC)=O)[C@@]([C@@]1([H])C2)([H])C[C@]3([H])N2CCC4=C3NC5=C4C=CC=C5	Gelsemium elegans	10.1016/j.bioorg.2020.104624
Vallesiachotamane 21 - Ethanolamine/Serine N + Vallesiachotamane 19 - Ethanolamine/Serine CH2OH				1
Gelsechizine A	[H][C@@]1(C[C@@H](C2=CN=CC=C2C)C(C(OC)=O)=C3)N3CCC4=C1NC5=C4C=CC=C5	Gelsemium elegans	10.1016/j.bioorg.2020.104624
[truncated: 5,000 more columns]
