# Supplementary material for: Structural diversity and chemical logic underlying the assembly of monoterpene indole alkaloids oligomers
Source: Royal Society of Chemistry journal article supplement (doi:10.1039/d4np00011k), 2024-01-01
Supplement: d4np00011k1.zip [file skeletons_smiles.xlsx]

## Sheet: Feuil1
Skeletons		SMILES
Ajmalicine		CC1OCCC2CC3C4=C(CCN3CC12)C5=C(C=CC=C5)N4
Ajmalicine-spiro		CC1C2CN(C3CC2CCO1)CCC43C5=C(NC4=O)C=CC=C5
Ajmaline		CCC1CN2C3C(C45CC2C(C5)C1C3)NC6=C4C=CC=C6
Akagerane		CCCC1CC2NCCC3=C2N(CC1)C4=C3C=CC=C4
Correantane		CCC1CC2C(N(C3=CC=CC=C34)CC1C)=C4CCN2
Akuammicine		CCC1C2CC(C34C(N(CC4)C1)C2)NC5=C3C=CC=C5
Akuammiline		CCC1CN2CCC34C(C=CC=C5)=C5NC3C2CC1C4
seco-akuammiline		CCC1CNC2CC1CC3(CCO4)C24NC5=C3C=CC=C5
Arbornane		CCC1CN2CCC3=C4N(CCC1C24)C5=CC=CC=C35
Aspidofractane		C1(NC23CCC4(C5C36CCN5CCC4)CC2)=C6C=CC=C1
Aspidospermane		CCC12CCC(C34C1N(CCC2)CC4)NC5=C3C=CC=C5
Cadambane		C1(NC2=C3CCN4CCC(COCC5)C5CC24)=C3C=CC=C1
Camptothecin		O=C1CC(C=C2N3CC4=CC5=C(N=C24)C=CC=C5)=C(CO1)C3=O
Seco-camptothecin		CC1=C(C=C2C3=NC4=C(C=C3CN2C1=O)C=CC=C4)C(CC)C
Chanofruticosinate		O=C(C1)C2CN(CCC3)C4C13CCC5C42C(C=CC=C6)=C6N5
Chippiine		CCC1CC2CC(C1NCC3)C4=C3C5=C(C=CC=C5)N4C2
Cinchona		CCC1C(CCN2C1)CC2CC3=CC=NC4=C3C=CC=C4
indolocinchona		CCC1CN2C(CC1CC2)C3=C(C4=CC=CC=C4N3)CC
Condylocarpane		CCC1C2CC(C34C1N(CC4)CC2)NC5=C3C=CC=C5
goniomane		C12=CC=CC=C1C3(CCN4CCC5CC3)C4C5CN2
Corynantheane		CCC1C(CC)CN(C2C1)CCC3=C2NC4=CC=CC=C43
Spiro-Corynantheane		O=C1NC2=CC=CC=C2C13C4CC(C(CC)CN4CC3)C(C)C
Eburnane		CCC12CCCN3C1C(N(CC2)C4=C5C=CC=C4)=C5CC3
Ervatamia		CCC1CNCC2C1CCC3=C(C4=C(N3)C=CC=C4)C2
Gelseminane		CC(C1CCC23C([N]C4=CC=CC=C34)=O)C5C2C1(CC)CN5
Gelsedane		CCC1NC2CC3(CCC1C2)C(NC4=CC=CC=C34)=O
Gelseleginane		CC[C@@]1(C)[N][C@@H]2C[C@]3(CCC1[C@@H]2C)C4=CC=CC=C4NC3=O
Isohumanteninane		O=C1NC(C=CC=C2)=C2C1(C3)CCC4C(C)C(C)NC3C4C
Ibogane		CCC1C2N3CC(CC2C4=C(CC3)C5=C(N4)C=CC=C5)C1
Tabertingginane		C1(NC2=C3CCN4CC5CC42CCC5)=C3C=CC=C1
Andranginane		C12=CC=CC=C1C(CCN3C4C5CCCC4CCC3)=C5N2
Conolutinane		CCC1CC2CCC34N(C5=CC=CC=C5C3CCN4C1)C2
Lirofolane		C12CCC(C3C2)N(CN4C3=CC5=C4C=CC=C5)C1
Kopsane		C1(NC23CCC45CC2CC6C37C4N(CCC5)C6)=C7C=CC=C1
Lapidilectine		C1(NC23C4CCN5CCCC5(CC3)CC2)=C4C=CC=C1
Leuconoxane		CCC12CCCN3CCC4C5=CC=CC=C5N(CCC2)C143
Macroline		CC1C2NC(CC1C(C)CC)C3=C(C4=C(C=CC=C4)N3)C2
Malindane		CC1C2=C(CC3N1CCC4=C3NC5=CC=CC=C45)C=CN=C2
Melodinus		C1(NCC2C34C5C(CCCN5CC4)C2)=C3C=CC=C1
Mersinlonginane		C1(NC2NCCC34C2CCCC4)=C3C=CC=C1
Melonine		CCC12CCC(NC3=C4C=CC=C3)(C5CC2)C4CCN5C1
Nacycline		CCC1C2NCCC1CC3=NC=CC4=C3N2C5=C4C=CC=C5
Pandoline		CCC(C1)CN2C3C1CCC(C43CC2)NC5=C4C=CC=C5
Arboridinane		C12=NC3=CC=CC=C3C14CCN(CC2C5)CC5C4
Arborisidinane		C12C3CCN1CCC4(C5=CC=CC=C5N=C24)CC3
Pleiocarpamane		N12CCC(C3C2C4)C5=C(C=CC=C5)N3CC4CC1
Pyridocarbazole		CC1=C2C=CN=CC2=CC3=C1NC4=C3C=CC=C4
Quebrachamine		CCC12CN(CCC3=C(CC2)NC4=C3C=CC=C4)CCC1
Rhazidane		C12=CC=CC=C1C3CC[N+]45CCCC(C5)CCC43N2
Rhazinilam		O=C(CCC1C2C3=CCN2CCC1)NC4=C3C=CC=C4
sarpagane		C1(NC2=C3CC4N5C2CC(CC5)C4)=C3C=CC=C1
Schizozygane		C12CCN3CCCC4(CCN5C6=CC=CC=C26)CCC15C34
Seco-schizozygane		CCC1(CCC2)CCC34C1N2CCC3C5=CC=CC=C5N4
Strictosidine		CCC1C(C(COC1)C)CC2NCCC3=C2NC4=CC=CC=C34
Pauridianthinane		C12=CN=CC=C1C(CC2)C3=NC=CC4=C3NC5=C4C=CC=C5
Geissolaevane		C12=CC=CC=C1C(C=CN=C3C4OCCC4)=C3N2
Strychnidine		CCC1CN2C3CC1C4C(C35CC2)N(CCC4)C6=C5C=CC=C6
Uleane		CC1C2CCN(C)C(C2CC)C3=C1NC4=C3C=CC=C4
Vallesamane		CCC1CN2CC3=C(CC1CC2)NC4=C3C=CC=C4
Nor-seco-vallesamane		CCC1CNCCC1CC2=CC3=CC=CC=C3N2
Vallesiachotamane		CC1C(CC2C3=C(CCN2C1)C(C=CC=C4)=C4N3)C(CC)C
Vindolinine		C1(NC23CCC4(C5C36CCN5CCC4)C2)=C6C=CC=C1
Vobasine		O=C1C2=C(CC3NCCC(C3)C1)C(C=CC=C4)=C4N2
Ervitsinane		O=C1C2=C(C3CC(C1)C(CC)CN3)C4=CC=CC=C4N2
Yohimbinoid		C12=C(C=CC=C2)C3=C(C4N(CC3)CC5CCCCC5C4)N1
Criofolinane		C1(NC2=C3CCN(CC4C5CCCC4)C5C2)=C3C=CC=C1
scholarisiane		C12CNC3CC1CC4(CC2)C3NC5=CC=CC=C45
Goniomitinane		CCC1(CC2)CCCNC1N3C2=CC4=C3C=CC=C4
Spiro-aspidospermane		CCC1CCCN2CCC3(C(NC4=C3C=CC=C4)=O)C12
Seco-aspidospermane		CCC1(C)CCC2NC3=CC=CC=C3C24C1N(CC4)CC
Leucolusinane		CCC12CCCN(CCC3C(NC4=CC=CC=C34)=O)C1OCC2
Mersicarpinane		N12CCCC3C1C(C4=CC=CC=C24)NCCC3
Angustinane		CCC1=CN=CC(C2)=C1CC(N2CC3)C4=C3C5=CC=CC=C5N4
Fruticosinane		C1(NC23C45C(N(CCC6)CC5CC7C3)C76CC2)=C4C=CC=C1
Dasyrachinane		C1(NC23C45C(N(CCC6)CC5C(C7)C3)C76CC2)=C4C=CC=C1
Antirhinane		CCC(C)C1CCN(C2C1)CCC3=C2NC4=C3C=CC=C4
Sempervirinane		C12=CN3C=CC4=C5C=CC=CC5=NC4=C3C=C1CCCC2
Vincorinane		CCC1CN2CCC34C5=CC=CC=C5NC23CCC1C4
Stemmadeninane		CCC1CN2CCC3=C(NC4=C3C=CC=C4)CC1CC2
Seco-strychnidine		CCC1CNCCC23C4C(COCCN4C5=CC=CC=C35)C1CC2
Isocorymane		O=C(O1)C2CCC1C34C(C5=CC=CC=C5N4)2CCN3
Cymosidane		CCC1COCC2C1CC3NCCC4C5=C(NC234)C=CC=C5
Arbophyllidinane		CCC1CN2CCC13CC4=C(CC32)C5=CC=CC=C5N4
Arbophyllinane		CCC12CN(C3CC1CCO2)CCC4=C3NC5=CC=CC=C45
Arboricinane		CCC1CCN(C2C1CC)CCC3=C2NC4=CC=CC=C43
Apogissoschizane		CCC1C2CC3C4C(C5=CC=CC=C5N4CC2)CCN3C1
Arboflorinane		O=C1NCC2CCCN3C2C1C4=C(CC3)C5=CC=CC=C5N4
Arboduridinane		C12NC3=CC=CC=C3C14CCN5CCC(C5C4)C2
Alstoscholactane		C12CCNCC1CCC(C3=C(N4)C=CC=C3)=C4C2
Mappianinane		C1(NC2=C3CCN(CC4C5CCOC4)C5C2)=C3C=CC=C1
Meloteninane		CC1C2CCC(C34C2N(CCC1)CC4)NC5=C3C=CC=C5
Iboluteninane		CCC1CC2CC3C1N(CCC34NC5=C(C=CC=C5)C4=O)C2
Ervaoffinane		O=C1C2N(CCN3C4C2CC(CC4)C3)C5=C1C=CC=C5
Nor-ibogane		CCC1C2N3CC(C1)CC2C4=C(C5=C(C=CC=C5)N4)C3
Nor-seco-ibogane		CCC1C2NCC(C1)CC2C3=CC4=C(C=CC=C4)N3
Voatingginane		C1(NC23C4CCN2CC5CCCC3C5)=C4C=CC=C1
Isoconolutinane		CCC12CCC34N(C5=CC=CC=C5C3CCN4CCC2)C1
Hunteracinane		CCC1C[N+]23CCC4C5=C(C=CC=C5)NC24CC1CC3
Koumine		CCC12CNC3CC1CCC(NC4=C5C=CC=C4)C25C3
Tacamane		CCC1CC2CCN3C4=C(CCN(C42)C1)C5=C3C=CC=C5
Tronocarpinane		C1(CCNCC2(CCC3)CC3C4)=C2N4C5=C1C=CC=C5
Secodine		CCC1CCCN(CCC2=C(NC3=C2C=CC=C3)CC)C1
Meloscandoninane		CC1CC2(C34C5C(CCCN5CC4)1C2)CNC6=C3C=CC=C6
spiroeburnane		CCC12CCCN3CCC4(N(C5=C(C4=O)C=CC=C5)CC2)C13
Meloyuninane		CCC12CCN3C4=C(C(C5=CC=CC=C35)=O)CN(CCC2)C41
Gelsemamidane		NC1=C(C23CC4C5COC2CC5C(CC)CN4C3=O)C=CC=C1
Humanteninane		O=C1NC2=C(C=CC=C2)C13CC4CC(C(CC)CN4)CC3
Seco-koumine		CNC1CC(CCC2NC3=C4C=CC=C3)C(CC)C24C1
Flabelliformidane		CCC1CNCC2C1CCC3=C(C4=C(N3)C=CC=C4)CC2
Pandinane		C1(NC2C34CCN(C5CC6)C4C6C5C2)=C3C=CC=C1
Cleavincathicane		CC1C2=NC3=C(C24C5C(C1)CN(CC5CC)CC4)C=CC=C3
Cleavincaroseane		CCC(C1)C2CCN1CCC3C4=C(N=C32)C=CC=C4
Kopsifolane		C1(NC2C3CC4(C5C26CCN5CCC4)CC3)=C6C=CC=C1
spirosarpagane		CCC(CN12)C3CC2C4(C(NC5=CC=CC=C54)=O)CC1C3
Meloyinane		CC12NC3=C(C=CC=C3)C1(CCN4CCC5)C4C65C(C)C2C6
Cleavamin		CCC1CC2CCC3=C(CCN(C2)C1)C4=CC=CC=C4N3
Cleaisovincathicane		CCC12CC3CCC4=NC5=CC=CC=C5C14CCN(C2)C3
Cleavincazalidane		CCC1(C2)C[N+]34CC2CC(C4(OC)O1)C([N]C5=C6C=CC=C5)=C6CC3
Ellipticinane		CC1=C2C=CN=CC2=C(C)C3=C1NC4=CC=CC=C43
Isopandolinane		CCC1(O)CN2CCC34C5=C(NC3=C(C)CC2(C4)C1)C=CC=C5
Seco-stemmadeninane		CC(C1=CC=CC=C1N2)=C2[C@@H](C)[C@@H](CCN(C)C/3)C3=C/C
Nor-seco-stemmadeninane		CC(C1=CC=CC=C1N2)=C2[C@@H](C)[C@@H](CCNC/3)C3=C/C
Dinor-seco-stemmadeninane		C/C=C1[C@@H]([C@H](C)C2=CC3=CC=CC=C3N2)CC[N]C\1
