# Supplementary material for: Structural diversity and chemical logic underlying the assembly of monoterpene indole alkaloids oligomers
Source: Royal Society of Chemistry journal article supplement (doi:10.1039/d4np00011k), 2024-01-01
Supplement: d4np00011k2.pdf [file d4np00011k2.pdf]

Electronic Supplementary Information (ESI)

## **Structural Diversity and Chemical Logic Underlying the Assembly of Monoterpene Indole Alkaloids Oligomers**

Pierre Le Pogam<sup>\*a</sup> and Mehdi A. Beniddir<sup>\*a</sup>

---

<sup>a</sup>Équipe « Chimie des Substances Naturelles » Université Paris-Saclay, CNRS, BioCIS, 17 avenue des Sciences, 91400 Orsay, France. E-mail: [pierre.le-pogam-alluard@universite-paris-saclay.fr](mailto:pierre.le-pogam-alluard@universite-paris-saclay.fr); [mehdi.beniddir@universite-paris-saclay.fr](mailto:mehdi.beniddir@universite-paris-saclay.fr)

## Summary

|      |                                                                 |   |
|------|-----------------------------------------------------------------|---|
| S1   | Bridging sites by skeleton .....                                | 2 |
| 1.1  | Ajmalane skeleton reactivity mapping .....                      | 3 |
| 1.2  | Ajmalicine skeleton reactivity mapping.....                     | 3 |
| 1.3  | Akuammicine skeleton reactivity mapping.....                    | 3 |
| 1.4  | Akuammilane skeleton reactivity mapping .....                   | 3 |
| 1.5  | Aspidofractane skeleton reactivity mapping .....                | 3 |
| 1.6  | Aspidospermane skeleton-cotaining based oligomers .....         | 3 |
| 1.7  | Chippiine skeleton reactivity mapping .....                     | 3 |
| 1.8  | Cleavamine skeleton and its derivatives reactivity mapping..... | 3 |
| 1.9  | Condylocarpane skeleton reactivity mapping .....                | 3 |
| 1.10 | Corynantheane skeleton reactivity mapping.....                  | 3 |
| 1.11 | Eburnane skeleton reactivity mapping .....                      | 3 |
| 1.12 | Ellipticine skeleton reactivity mapping .....                   | 3 |
| 1.13 | Gelsemium skeletons reactivity mapping.....                     | 3 |
| 1.14 | Hunteracinane skeleton reactivity mapping.....                  | 3 |
| 1.15 | Ibogane skeleton reactivity mapping.....                        | 3 |
| 1.16 | Isopandolinane skeleton reactivity mapping.....                 | 3 |
| 1.17 | Koumine skeletons reactivity mapping.....                       | 3 |
| 1.18 | Lapidilectinane skeleton reactivity mapping .....               | 4 |
| 1.19 | Macrolane skeletons reactivity mapping.....                     | 4 |
| 1.20 | Melodinus skeleton reactivity mapping .....                     | 4 |
| 1.21 | Melonine skeleton reactivity mapping .....                      | 4 |
| 1.22 | Meloscandoninane skeleton reactivity mapping.....               | 4 |
| 1.23 | Pleiocarpamane skeleton reactivity mapping.....                 | 4 |
| 1.24 | Quebrachamine skeleton reactivity mapping.....                  | 4 |
| 1.25 | Rhazidine skeleton reactivity mapping .....                     | 4 |
| 1.26 | Rhazinilam skeleton reactivity mapping .....                    | 4 |
| 1.27 | Sarpagane and spirosarpagnane skeleton reactivity mapping ..... | 4 |
| 1.28 | Secodine skeleton reactivity mapping .....                      | 4 |
| 1.29 | Seco-camptothecine skeleton reactivity mapping.....             | 4 |
| 1.30 | Seco-schizozygane skeleton reactivity mapping.....              | 4 |
| 1.31 | Seco-stemmadeninane skeleton reactivity mapping.....            | 4 |
| 1.32 | Stemmadeninane skeleton reactivity mapping .....                | 4 |
| 1.33 | Strictosidine skeleton reactivity mapping.....                  | 5 |
| 1.34 | Strychnane skeleton reactivity mapping .....                    | 5 |
| 1.35 | Vallesamane skeleton reactivity mapping .....                   | 5 |
| 1.36 | Vallesiachotamane skeleton reactivity mapping .....             | 5 |
| 1.37 | Vincorinane skeleton reactivity mapping .....                   | 5 |

|                                                                     |    |
|---------------------------------------------------------------------|----|
| 1.38 Vindoline skeleton reactivity mapping .....                    | 5  |
| 1.39 Vobasane skeleton reactivity mapping .....                     | 5  |
| 1.40 Yohimbineoid skeleton reactivity mapping .....                 | 5  |
| S2 MIA oligomers classified according to their assembly logic ..... | 5  |
| S3 The puzzling case of tenuiphylline .....                         | 14 |
| S4 Summarized figures for MIA oligomerization chemical logic. ....  | 17 |
| S5 References .....                                                 | 18 |

# 1 Bridging sites by skeleton

## 1.1 Ajmalane skeleton reactivity mapping

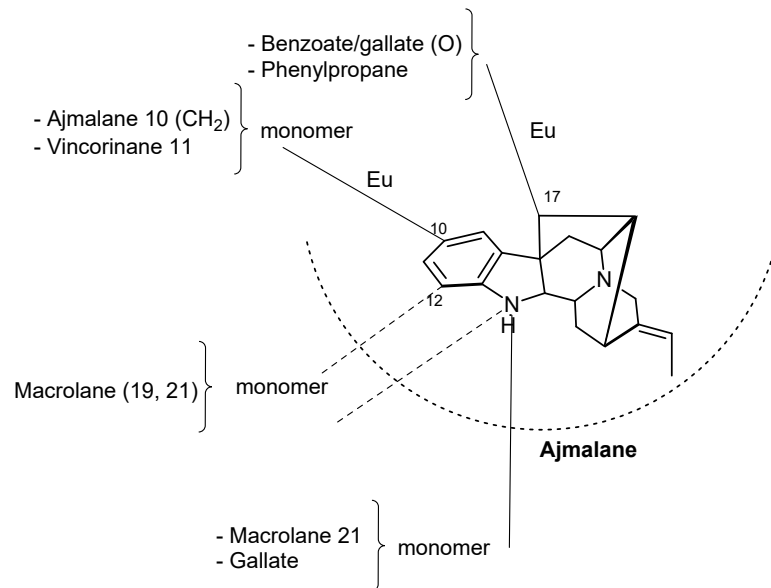

## 1.2 Ajmalicine skeleton reactivity mapping

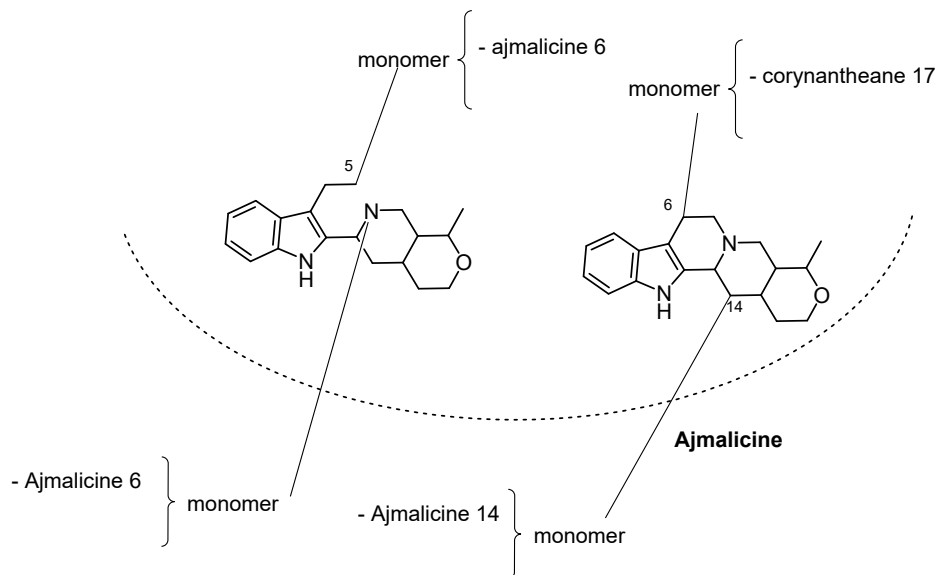

### 1.3 Akuammicine skeleton reactivity mapping

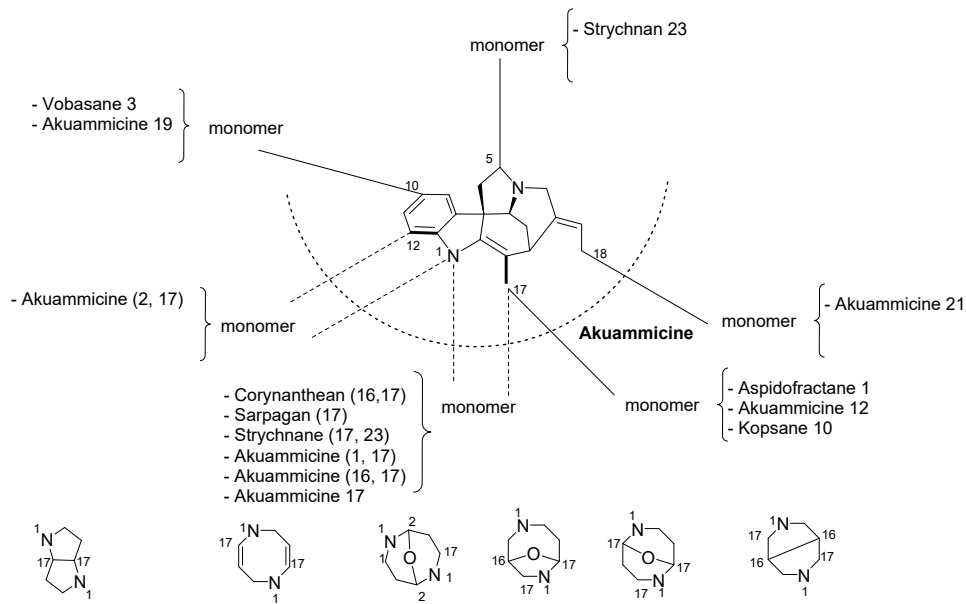

### 1.4 Akuammilane skeleton reactivity mapping

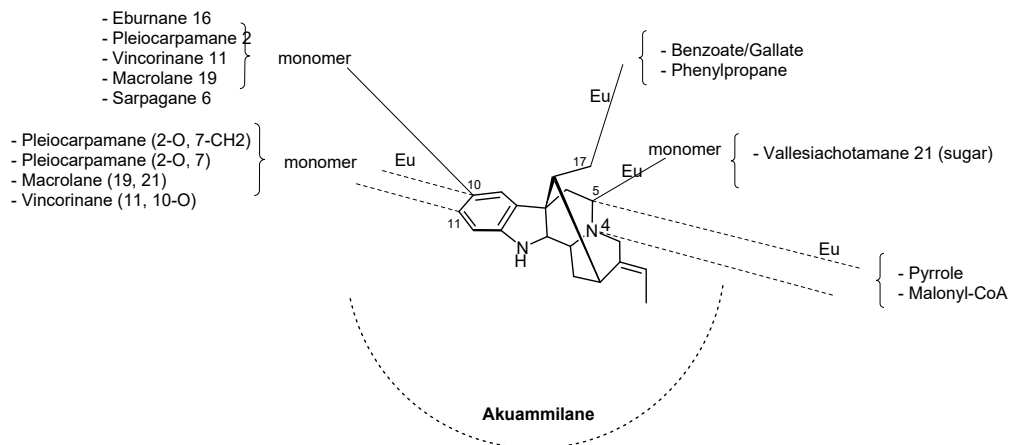

### 1.5 Aspidofractane skeleton reactivity mapping

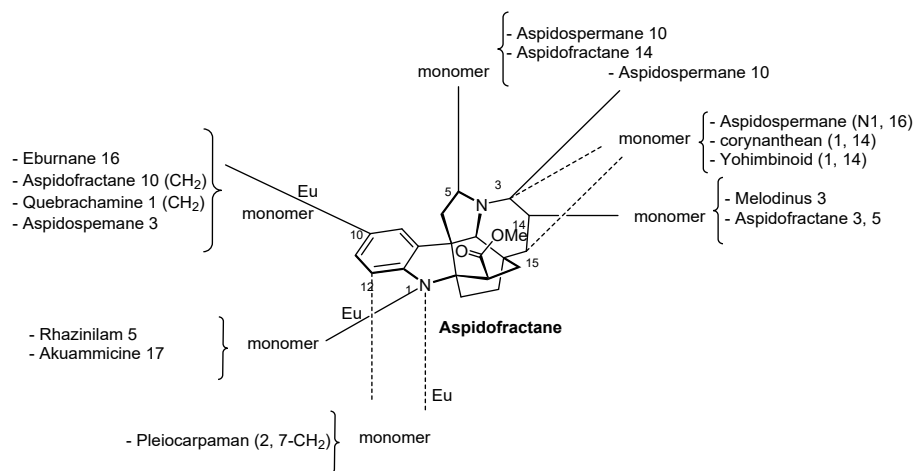

## 1.6 Aspidospermane skeleton-containing based oligomers

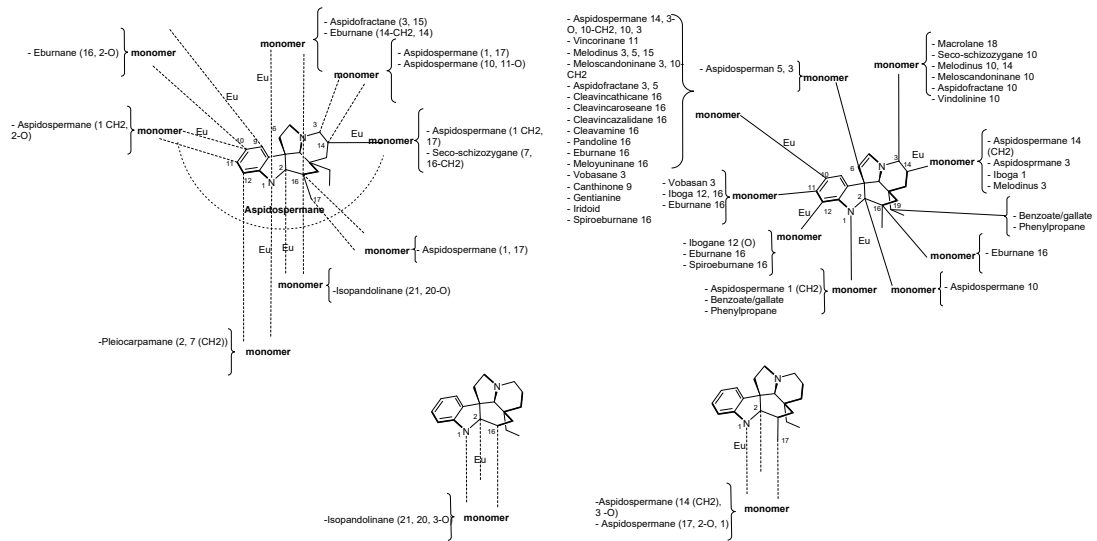

## 1.7 Chippiine skeleton reactivity mapping

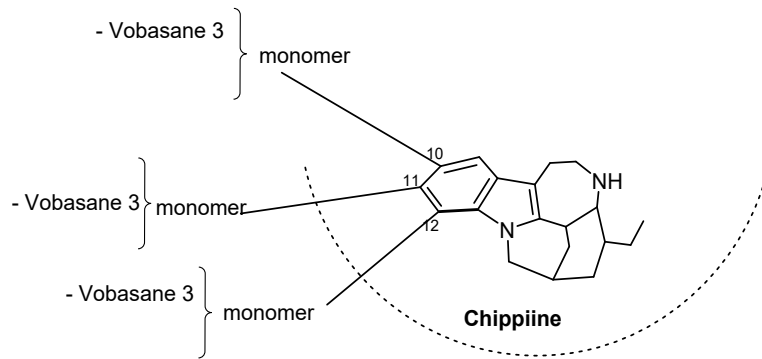

## 1.8 Cleavamine skeleton and its derivatives reactivity mapping

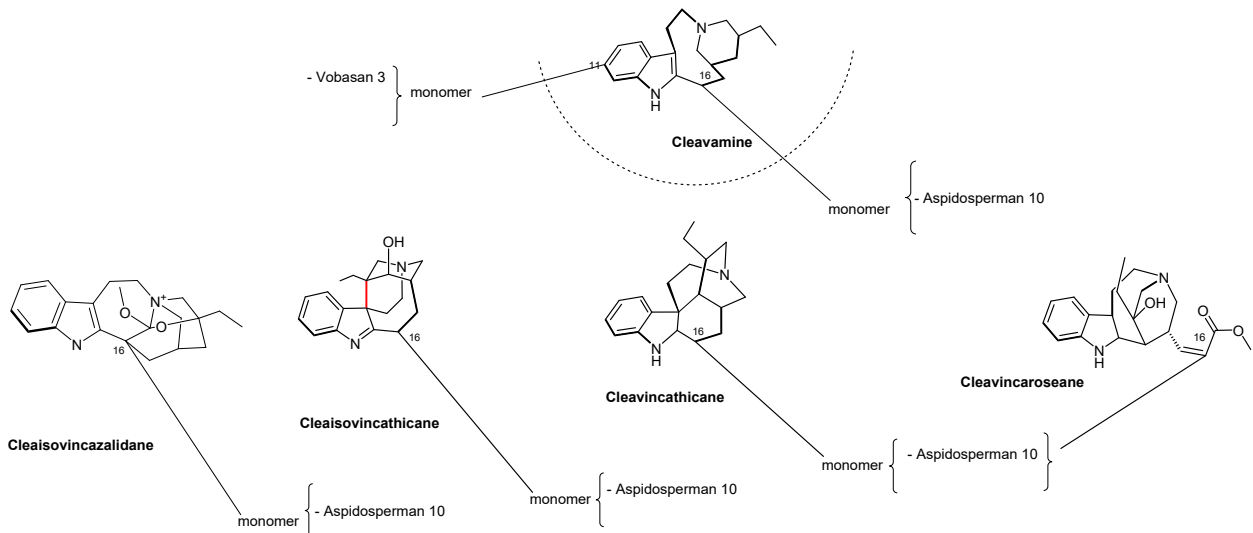

## 1.9 Condylcarpane skeleton reactivity mapping

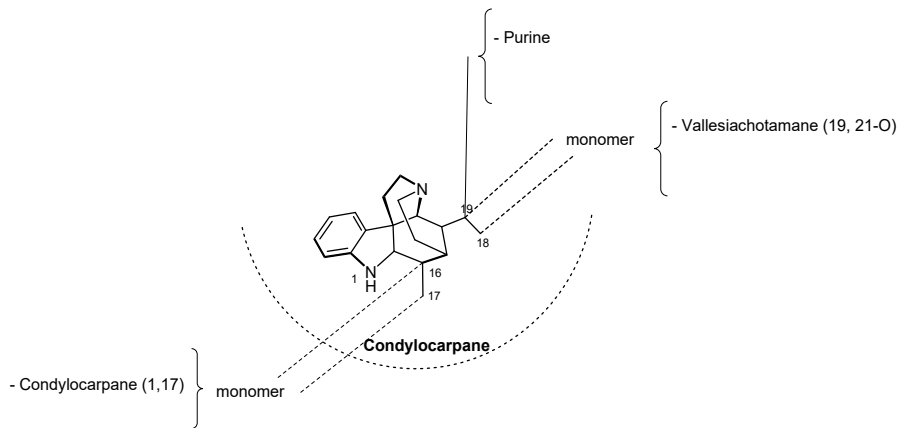

## 1.10 Corynantheane skeleton reactivity mapping

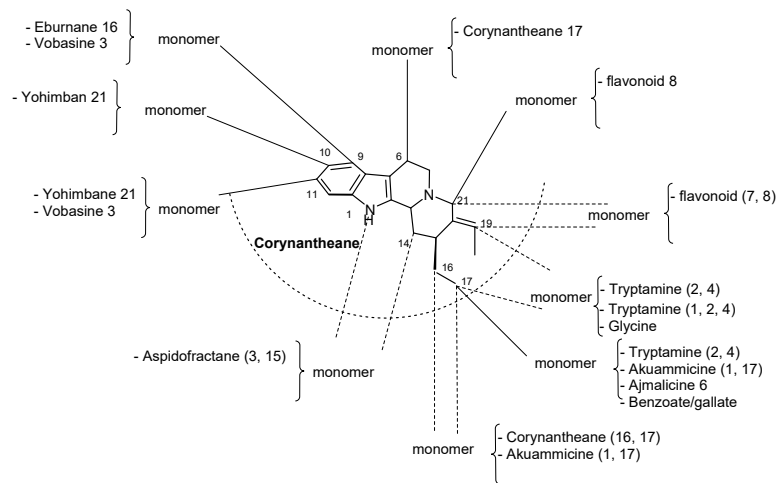

## 1.11 Eburnane skeleton reactivity mapping

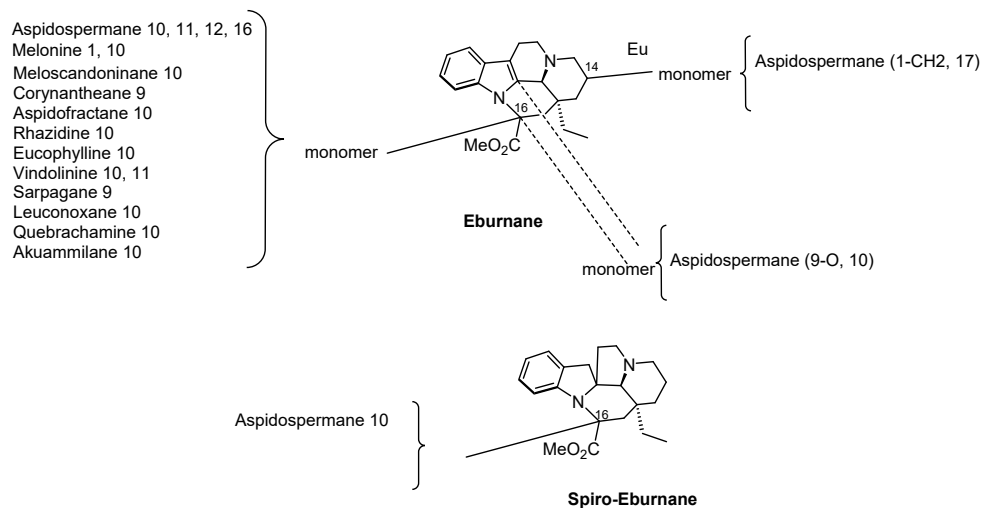

## 1.12 Ellipticine skeleton reactivity mapping

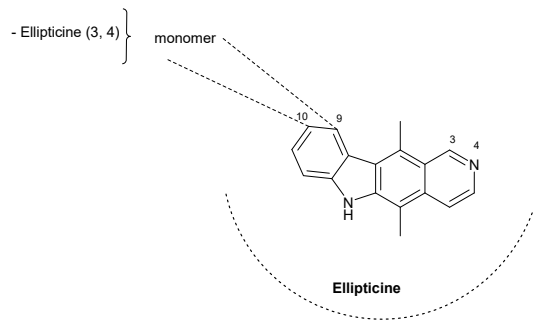

## 1.13 Gelsemium skeletons reactivity mapping

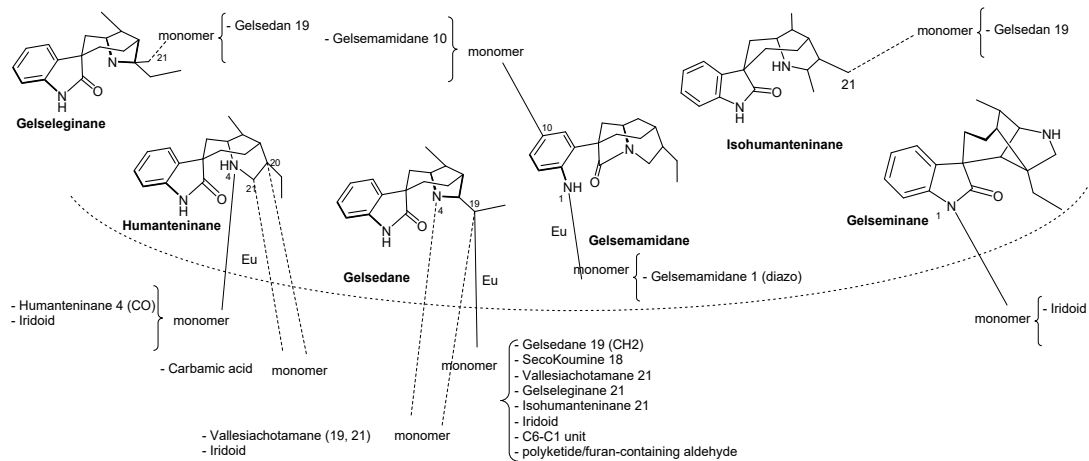

## 1.14 Hunteracinane skeleton reactivity mapping

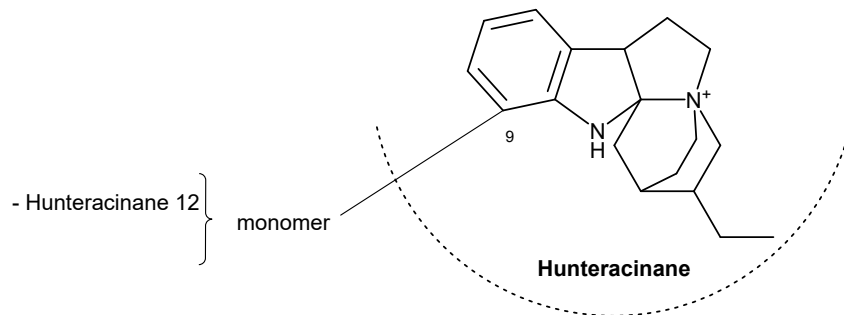

## 1.15 Ibogane skeleton reactivity mapping

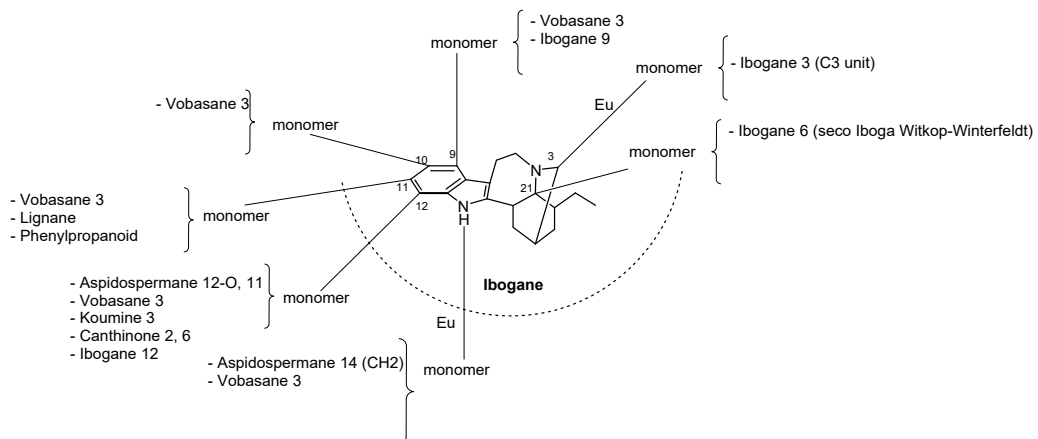



### 1.16 Isopandolinane skeleton reactivity mapping

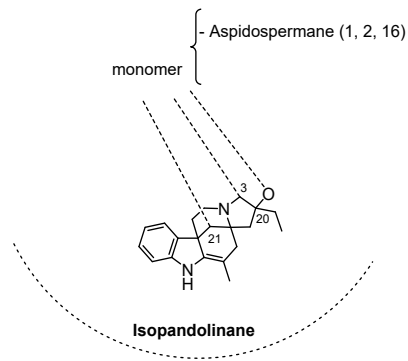

### 1.17 Koumine skeletons reactivity mapping

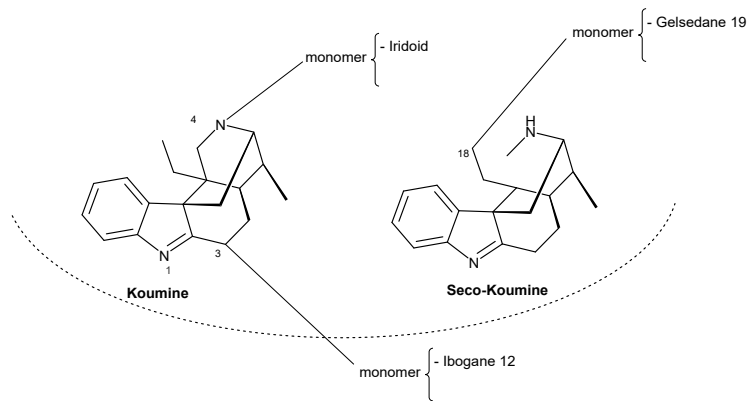

### 1.18 Lapidilectinane skeleton reactivity mapping

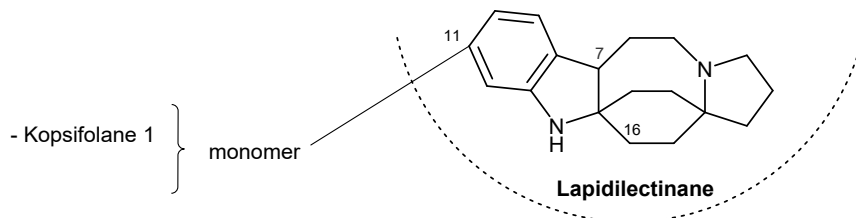

### 1.19 Macrolane skeletons reactivity mapping

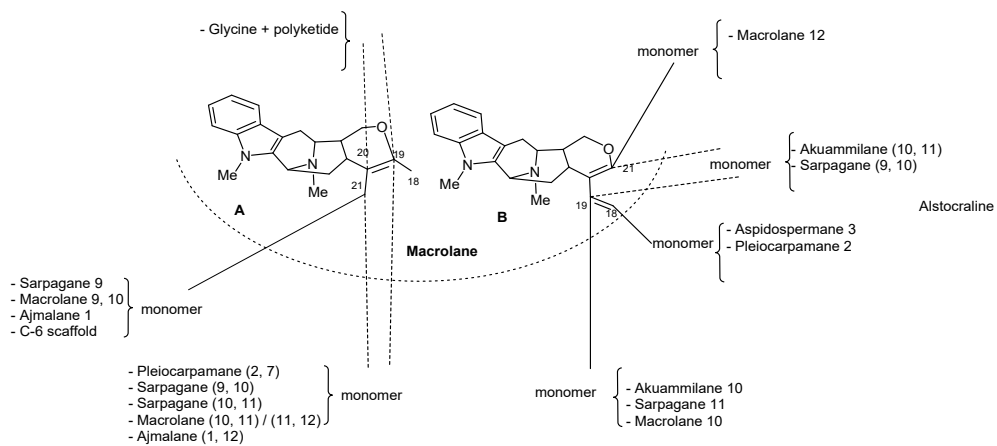

## 1.20 Melodinus skeleton reactivity mapping

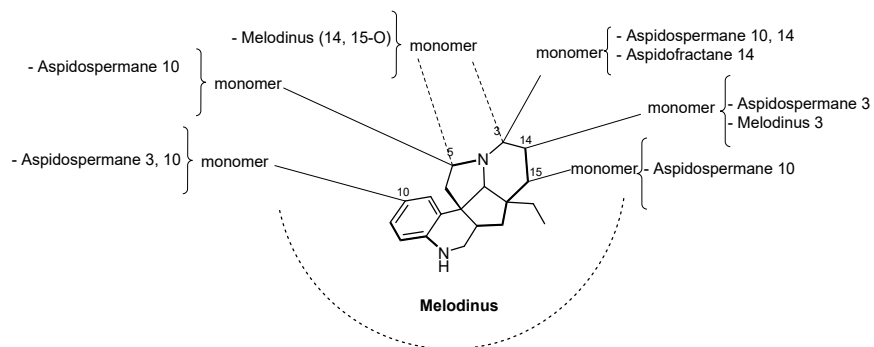

## 1.21 Melonine skeleton reactivity mapping

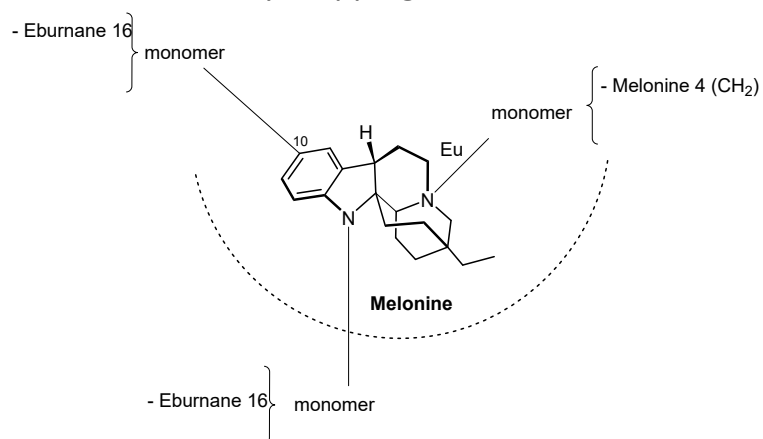

## 1.22 Meloscandoninane skeleton reactivity mapping

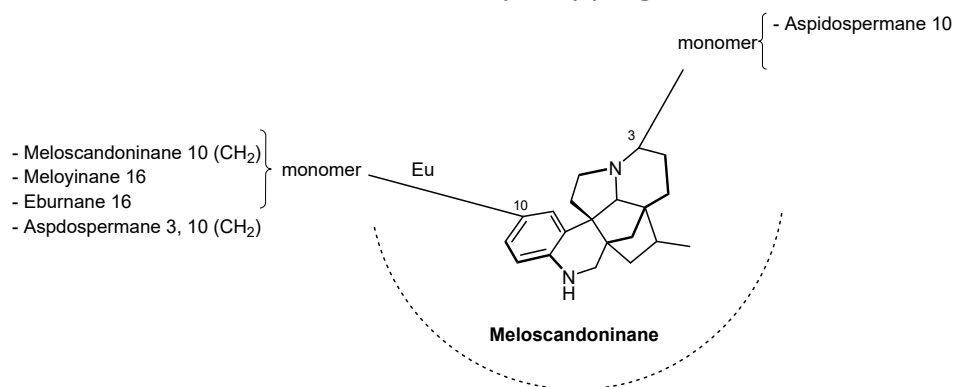

### 1.23 Pleiocarpamane skeleton reactivity mapping

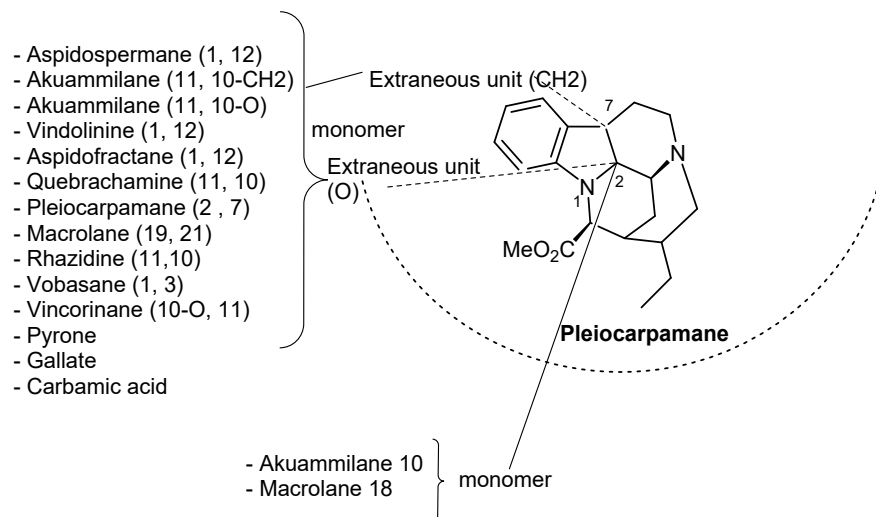

### 1.24 Quebrachamine skeleton reactivity mapping

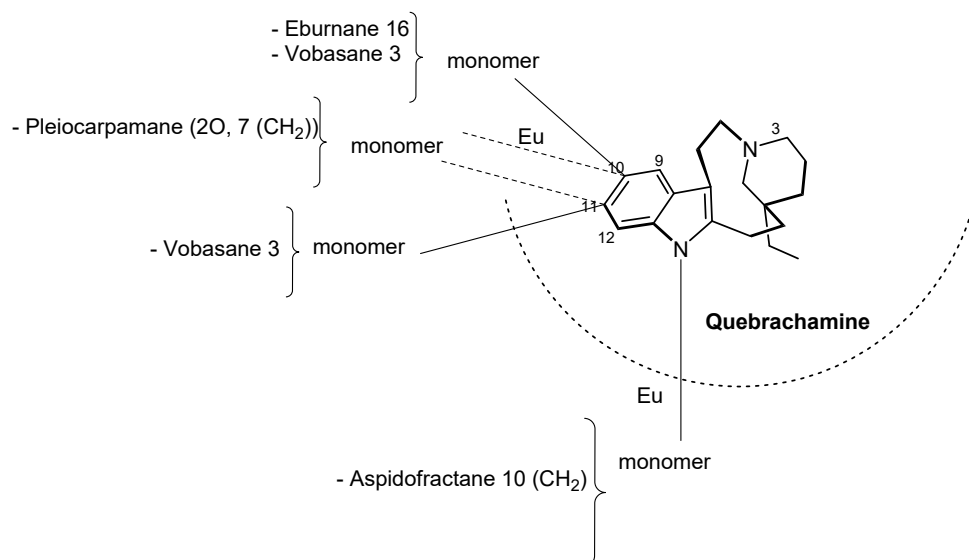

### 1.25 Rhazidine skeleton reactivity mapping

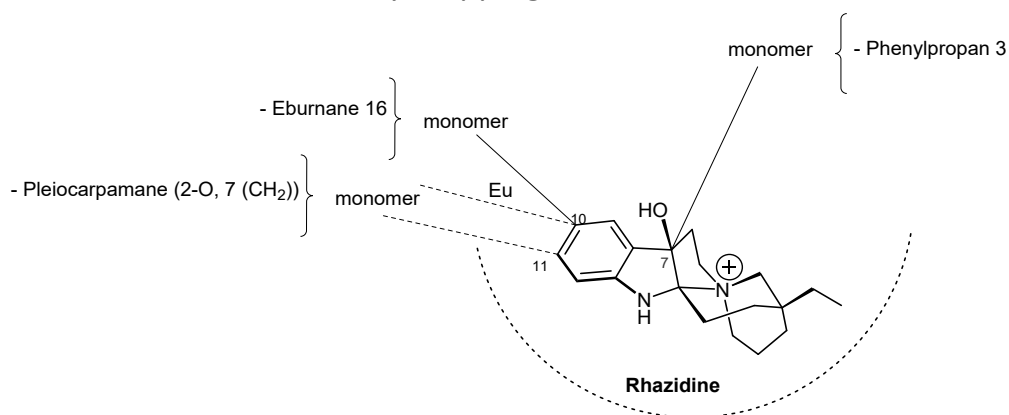

## 1.26 Rhazinilam skeleton reactivity mapping

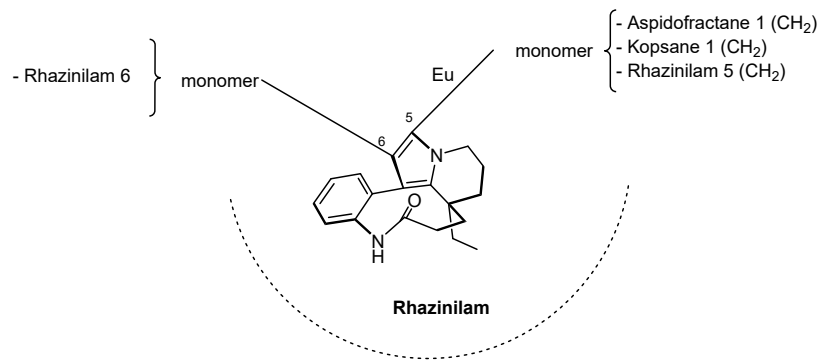

## 1.27 Sarpagane and spirosarpagane skeleton reactivity mapping

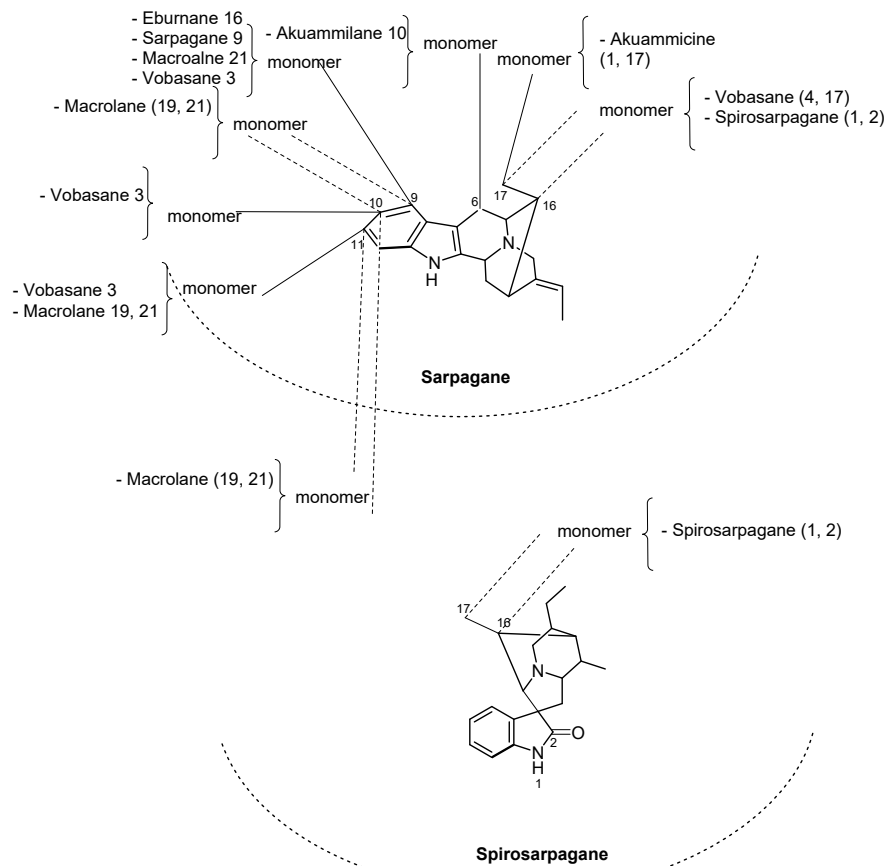

## 1.28 Secodine skeleton reactivity mapping

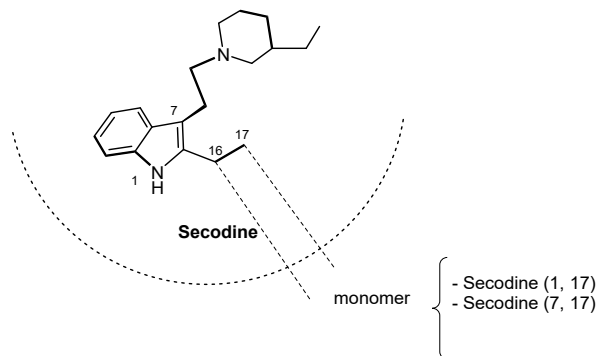

### 1.29 Seco-camptothecin skeleton reactivity mapping

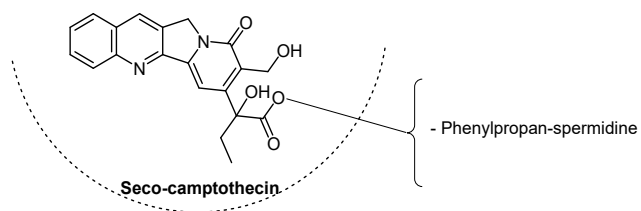

### 1.30 Seco-schizogyane skeleton reactivity mapping

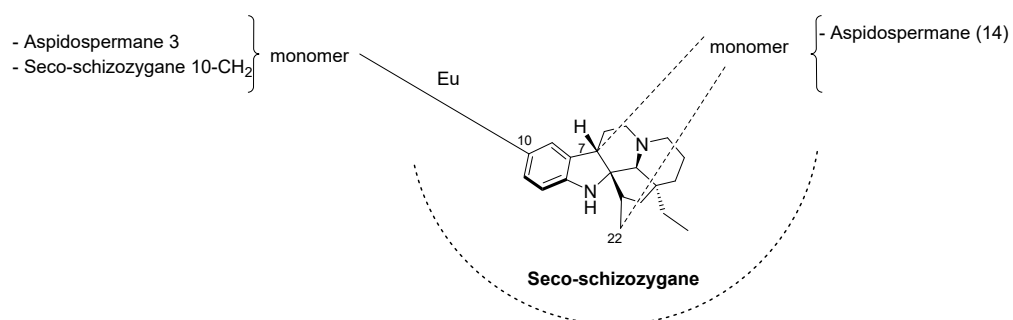

### 1.31 Seco-stemmadeninane skeleton reactivity mapping

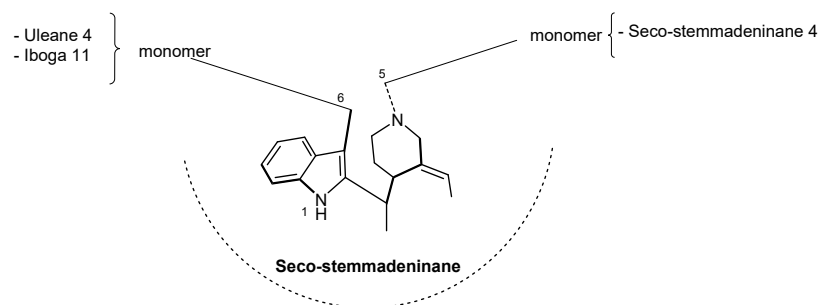

### 1.32 Stemmadeninane skeleton reactivity mapping

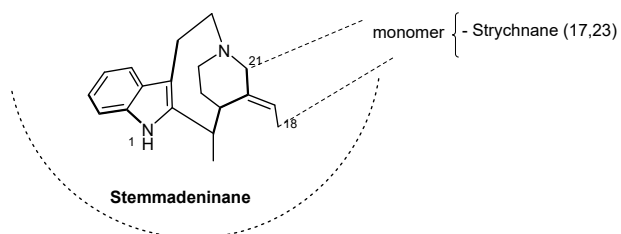

### 1.33 Strictosidine skeleton reactivity mapping

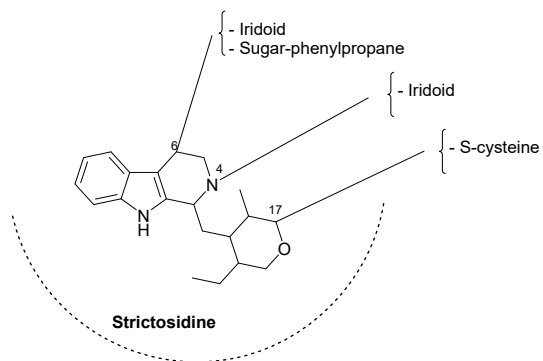

### 1.34 Strychnane skeleton reactivity mapping

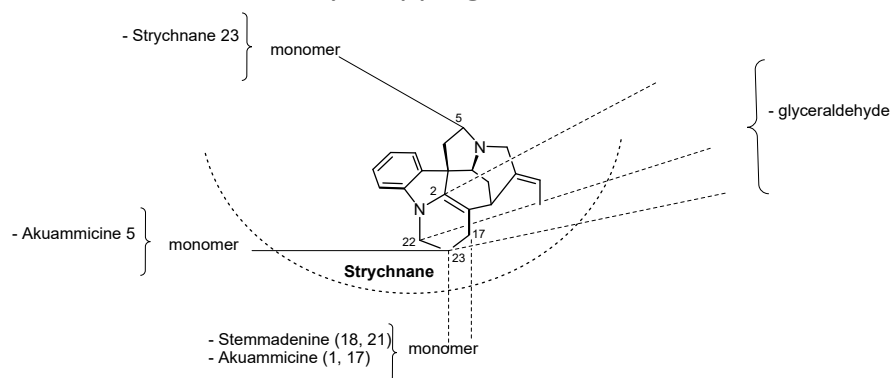

### 1.35 Vallesamane skeleton reactivity mapping

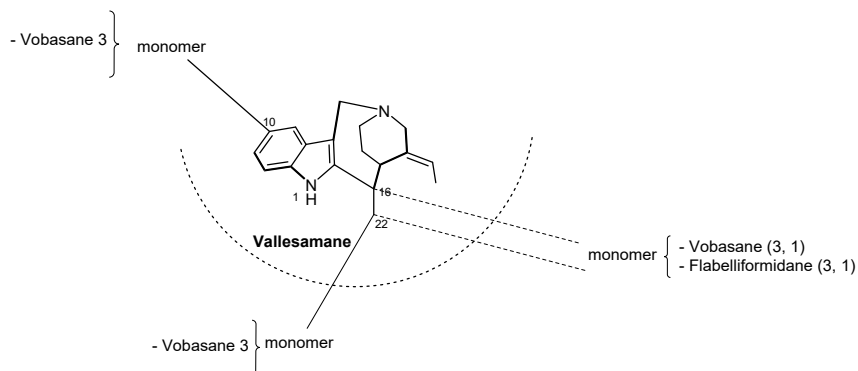

### 1.36 Vallesiachotamane skeleton reactivity mapping

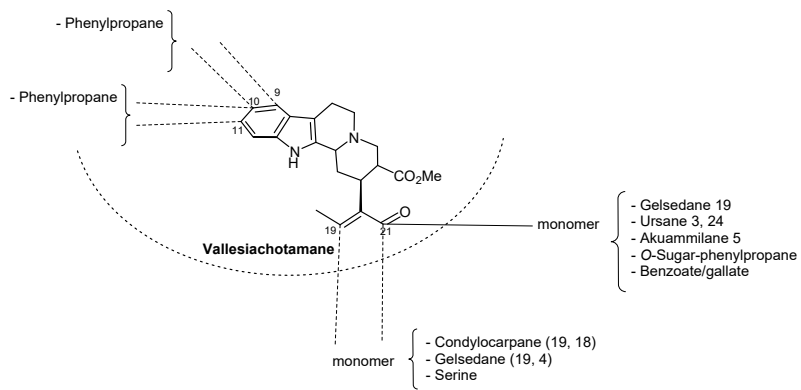

### 1.37 Vincorinane skeleton reactivity mapping

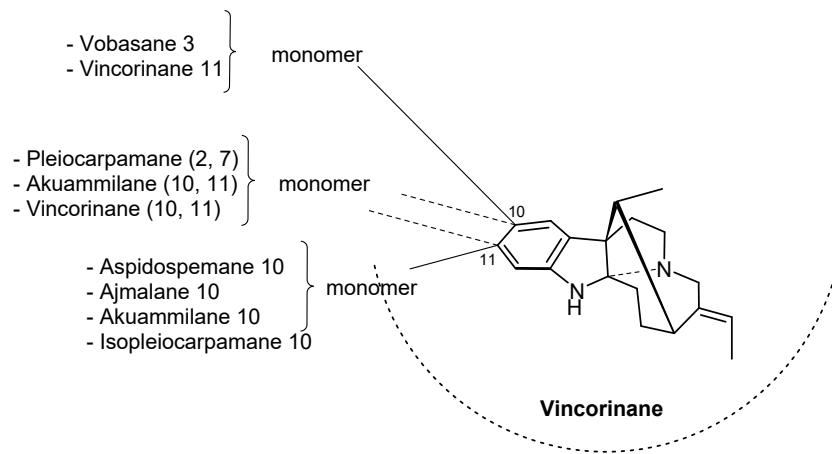

### 1.38 Vindolinine skeleton reactivity mapping

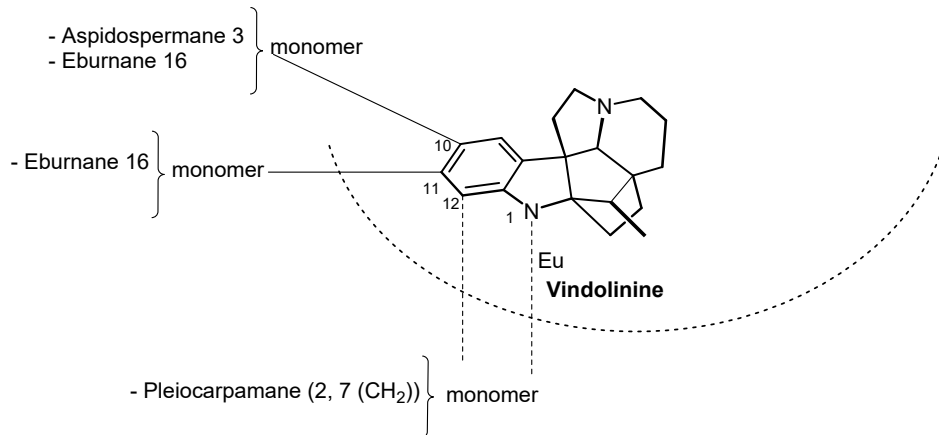

### 1.39 Vobasane skeleton reactivity mapping

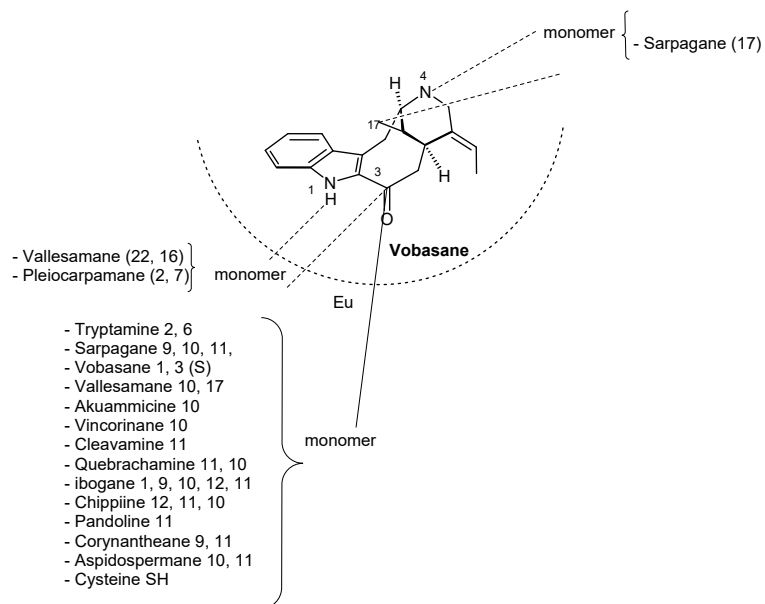

### 1.40 Yohimbinoid skeleton reactivity mapping

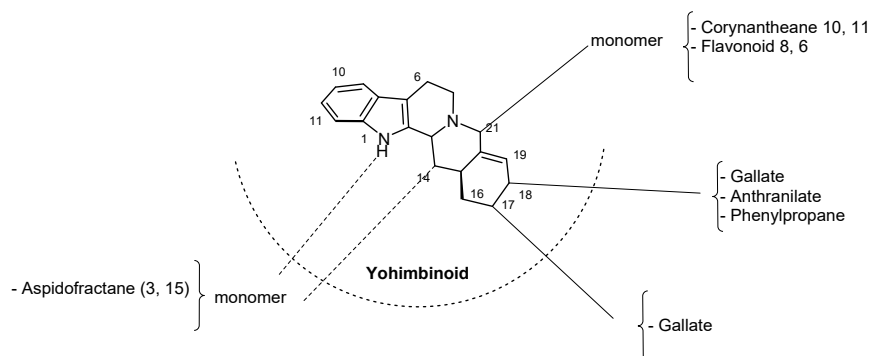



## 2 MIA oligomers classified according to their assembly logic

| Tethering mode                                    | Reactivity                                                     | Oligomers                                                                                                                                                                                                                                                                                                                                                                                                                                                                                                                                                                                                                                                                                                                                                                                                                                                                                                                                                                                                                                                                                                                                                                                                                                                                                                                                                                                                                                                                                                                                                                                                                                                                                                                                                                                                                                                                                                                                                                                                                                                                                                                                                                                                                                                                                                                                                                                                                                                                                                                                                                                            |
|---------------------------------------------------|----------------------------------------------------------------|------------------------------------------------------------------------------------------------------------------------------------------------------------------------------------------------------------------------------------------------------------------------------------------------------------------------------------------------------------------------------------------------------------------------------------------------------------------------------------------------------------------------------------------------------------------------------------------------------------------------------------------------------------------------------------------------------------------------------------------------------------------------------------------------------------------------------------------------------------------------------------------------------------------------------------------------------------------------------------------------------------------------------------------------------------------------------------------------------------------------------------------------------------------------------------------------------------------------------------------------------------------------------------------------------------------------------------------------------------------------------------------------------------------------------------------------------------------------------------------------------------------------------------------------------------------------------------------------------------------------------------------------------------------------------------------------------------------------------------------------------------------------------------------------------------------------------------------------------------------------------------------------------------------------------------------------------------------------------------------------------------------------------------------------------------------------------------------------------------------------------------------------------------------------------------------------------------------------------------------------------------------------------------------------------------------------------------------------------------------------------------------------------------------------------------------------------------------------------------------------------------------------------------------------------------------------------------------------------|
| <b>3.1.1. Electrophilic aromatic substitution</b> |                                                                |                                                                                                                                                                                                                                                                                                                                                                                                                                                                                                                                                                                                                                                                                                                                                                                                                                                                                                                                                                                                                                                                                                                                                                                                                                                                                                                                                                                                                                                                                                                                                                                                                                                                                                                                                                                                                                                                                                                                                                                                                                                                                                                                                                                                                                                                                                                                                                                                                                                                                                                                                                                                      |
| 1                                                 | Electrophilic aromatic substitution onto formaldehyde          | raureflexine, kopoffine C, melotenuine A pleiokomenines A-B, methylenebismehranine, vindolicine, melomorsine I, meloyine II-III, 10,10'-methylenebis[norvallesamidine], taberdisine F                                                                                                                                                                                                                                                                                                                                                                                                                                                                                                                                                                                                                                                                                                                                                                                                                                                                                                                                                                                                                                                                                                                                                                                                                                                                                                                                                                                                                                                                                                                                                                                                                                                                                                                                                                                                                                                                                                                                                                                                                                                                                                                                                                                                                                                                                                                                                                                                                |
| 1                                                 | Electrophilic aromatic substitution quinone methide            | conoliferine, isoconoliferine, conomicidines A-B, isoconomicidines A-B,                                                                                                                                                                                                                                                                                                                                                                                                                                                                                                                                                                                                                                                                                                                                                                                                                                                                                                                                                                                                                                                                                                                                                                                                                                                                                                                                                                                                                                                                                                                                                                                                                                                                                                                                                                                                                                                                                                                                                                                                                                                                                                                                                                                                                                                                                                                                                                                                                                                                                                                              |
| 1                                                 | Electrophilic aromatic substitution via conjugate addition 1,6 | tabernaemontabovine, tabernaemontavine, accedinisine, demethylaccedinisine, accedinine, bisnaecarpamines A-B, pseudovobparicine, coryzeylamine, deformylcoryzeylamine, voacalgine F, vobatensine E, voacamidine, 3'oxotabernaegantine B, tabernaegantine B,(3'R)-tabernaegantinal B, conodiparine A, ervahanine B, N-demethylervahanine B, 3'-hydroxy-N4-demethylervahanine B, ervahaimine B, ervahainamidine B, polyneurine P, conoduramine, 19,20-epoxyconoduramine, 3'(R)-hydroxyconoduramine, 3'(S)-hydroxyconoduramine, 3' (R/S)-hydroxy-N(4)-demethylervahanines B, 11' - demethylconoduramine, 19' (R)-hydroxyconoduramine, 19' (S)-hydroxyconoduramine, gabunamine (N-demethylconoduramine), 3 (R/S)-hydroxytabernaegantine B, conodiparine C conodirinine A, tabernaegantinine D, tabernaegantine D, (3'R)-hydroxytabernaegantine D, ervachinines C-D, tabernaricatine C, tabernaricatine E, tabernaegantinine B, taberdivarines C- D, 3'-(2-oxopropyl)-ervahanine B, 3'-oxotabernaegantine D, taburnaemine D taburnaemine H, taberyunines H-I, taberine D, tabernaricatines A-B, tabernaricatine D, 3'-oxotabernaegantine A, 3'-(R/S)-hydroxytabernaegantine A, tabernaegantine C, 3'-S-hydroxytabernaegantine C, 3-R/S-methoxytabernaegantine C, tabernaegantinine A, 3-(2-oxopropyl)conodurine, tabernaegantine A, 19' R-tabernaegantine A, conodiparine B, conodurine, gabunine, 19'(S)-hydroxyconodurine, conodurine, ervahanine C, 3' (R/S)-hydroxyconodurine, 3' (R/S)-hydroxy-16-decarbomethoxyconodurine, 19' (R)-hydroxyconodurine, conodiparines D-F, conodutarines A-B, cononitarines A-B, conodirinine B, tabernaegantinine C, tabernaegantinal A, (3' R)-tabernaegantinal E, tabercorines A-C, tabernaecorymbosine A, 17-acetyltabernaecorymbosine A, tabercorymine B, taburnaemines A-C, taburnaemines E-G, taberines A-C, (19'S)-hydroxytabernaegantine A, (19'S)-hydroxytabernaegantine C, 3'-oxotabernaegantine C, 3'-oxoconodurine, 3'S-hydroxy, ervahanine A, 19'(S)-hydroxyervahanine A, 3'-(2-oxopropyl)ervahanine A, 3'-hydroxy-N4-demethylervahanine A, ervahaimine A, ervahainamidine A, 16'-decarbomethoxyvoacamine, 16'-decarbomethoxyvoacaminepseudoindoxyl, 16'-decarbomethoxy-20-epidihydrovoacamine, 16'-decarbomethoxy-19,20-dihydrovoacamine, Voacamine (20alphaH/20betaH), voacamine A, 3' (R/S)-hydroxyvoacamine, 3' (R/S)-hydroxytabernamine, N4-demethyltabernamine, 3' (R/S)-hydroxy-N(4)-demethyltabernamine, 3' (R/S)-hydroxy-N(4)-demethylervahanines A, voacorine, epivoacorine, 19,20-dihydro-20(S)-tabernamine, conodurarine, ervachinines A-B, |

|   |                                                                                                                       |                                                                                                                                                                                                                                                                                                                                                                                                                                                                                                                                                                                                                                                                                                                                                                                                                                                                                                                                                                                                                                                                                                 |
|---|-----------------------------------------------------------------------------------------------------------------------|-------------------------------------------------------------------------------------------------------------------------------------------------------------------------------------------------------------------------------------------------------------------------------------------------------------------------------------------------------------------------------------------------------------------------------------------------------------------------------------------------------------------------------------------------------------------------------------------------------------------------------------------------------------------------------------------------------------------------------------------------------------------------------------------------------------------------------------------------------------------------------------------------------------------------------------------------------------------------------------------------------------------------------------------------------------------------------------------------|
|   |                                                                                                                       | ervatensine B, 19,20-dehydrotabernamine, 19,20-dihydroervahanine A, 3'-hydroxyvoacamine, voacamine Nb-oxide, N-demethylvoacamine, 10'-demethoxy-19,20-dihydrovobatsensine D, taberdivarine E, vobatsensines A-D, vobatsensine F, tabernamine, 19'(R/S)-hydroxytabernamine, tabernadimines A-B, ervadivaricatines A-B, 3'-(2-oxopropyl)-19,20-dihydrotabernamine, capuvosine, N-demethylcapuvosine, dehydroxycapuvosine, taberdivarines A-B, bistabercarpamines A-B, tabercarpamines A-B, capuvosidine, 1'-2'-dihydrocapuvosidine, tabercorymine A, hunterizeyline A-E, vobatricine, ceridimine, demethylceridimine, hunteriatryptamine, pyrrovobasine                                                                                                                                                                                                                                                                                                                                                                                                                                           |
| 1 | Polonovski-Potier fragmentation + Electrophilic aromatic substitution via conjugate addition 1,6                      | vinblastine, vincristine, leurocolumbine, anhydrovinblastine, leurosine, vinblastine Nb'-oxide, isoleurosine (20'-deoxyvinblastine, vincovaline), leurosine (vinrosidine ou 20'-epivinblastine), leurosine Nb'-oxide, 20'-deoxyleurosine, isoleurosine N4'-oxide (20'-deoxyvinblastine N4'-oxide), leurosine (=vinleurosine), pleurosine, catharine, vinamidine (syn catharinine), (3R)-hydroxyvinamidine, vincovaline, catharanthamine, vinformide, 17-deacetoxyvinamidine, 17-deacetoxyleurosine, 17-deacetoxyvinblastine, 17-deacetoxyvinblastine N'b-oxide, 20'-deoxyvinblastine N'b-oxide, 21'-hydroxyleurosine, 21'-oxoleurosine, vincadioline, N-demethylvinblastine (N-deformylvincristine), vincovalicine, cycloleurosine, 14',15'-didehydrocyclovinblastine, cyclovinblastines A-B, 17-deacetoxyvinblastine, roseadine, vincathicine, isovincathicine, vincalidine A                                                                                                                                                                                                                  |
| 1 | Electrophilic aromatic substitution onto iminium                                                                      | tabernaebovine, peduncularidine, pedunculine/conofoline, melosuavines A-H, melofusines C-H, taberyunines D-F, taberdivarine B, taberdivarine H, axidimins A-D, scandomelone, episcandomelone, scandomeline, episcandomeline, melokhanines L-M, scandomelidine, plumocraline, suadimin J, pleiomutine, norpleiomutine, kopsoffine, kopsoffinol, demethylnorpleiomutine, insulopinine, tenuicausine, demethyltenuicausine, strempeliopidine, melodinine J, mekongenines A-F, melofusine A, melotenuines B-C, bousigonine H, bousigonines C-D, bisleuconothine A, melodinine V, celastromelidine, bisnicalaterines B-D, leucophyllines A-B, melaxillaridine, leucophyllidine, melodinines H-I, melodinhenines A-B, leuconoline, melodinines Y1-Y2, bousigonine A, bousigonine G, umbellamine/hunterine, bisleuconothines C-D, angustifonines A-B, criophylline, 14'-hydroxycriophylline, 14'-sulfocriophylline, uncaramine, callophyllines A-B, callophylline, taberdisines D-E, melofusines A-B, gentiacraline, bonafousine, isobonafousine, uncariagambiriines A-C, epicatechocorynantheines A-B |
| 1 | Electrophilic aromatic substitution onto $\alpha,\beta$ -unsaturated carbonyl and $\alpha,\beta$ -unsaturated iminium | leucoridine D, lumusidines A-D, panganensines X-Y, arbolodine C, suadimin I, alstomacrophylline, angusticaline, angustilongine A, angustilongines C-K, perhentisines A-C, perhentidines A-C, vincarubine, undulatine, macralstonine, O-methylmacralstonine, des-N1a-methylanhidromacralstonine, perhentine, taberdisines A-B, alstomaphyllines A-C, F-I, vindogentianine                                                                                                                                                                                                                                                                                                                                                                                                                                                                                                                                                                                                                                                                                                                        |
| 1 | Electrophilic aromatic substitution onto oxygenated functionality, onto epoxide and dehydration                       | undulatine, deformoundulatine, tabernaemontine L, melokhanine K                                                                                                                                                                                                                                                                                                                                                                                                                                                                                                                                                                                                                                                                                                                                                                                                                                                                                                                                                                                                                                 |

| 3.1.2. Radical coupling              |                                                                                                                                                 |                                                                                                                                                                                                                                                                                                                                                                                                                                                                                                                                                                                                                                                                                                                                                                                                                |
|--------------------------------------|-------------------------------------------------------------------------------------------------------------------------------------------------|----------------------------------------------------------------------------------------------------------------------------------------------------------------------------------------------------------------------------------------------------------------------------------------------------------------------------------------------------------------------------------------------------------------------------------------------------------------------------------------------------------------------------------------------------------------------------------------------------------------------------------------------------------------------------------------------------------------------------------------------------------------------------------------------------------------|
| 1                                    | Radical coupling                                                                                                                                | 11-[10-(11-methoxyvincamajinyl)]-vincorine, 11-[10-(11-methoxy-17- <i>epi</i> -vincamajinyl)]-vincorine, 11-[10-(11-methoxyvincamedinyl)]-vincorine, flexicorine, cabufile, deoxycabufile, rausutrine, rausutranine, vingramine, methylvingramine, ceylanine, peceylanine, 10,10'-bis[ <i>N</i> -acetyl-11,12-dihydroxyaspidospermidine], dispegatrine, geleganamide, rausutrine, rausutranine geleganidine B (N=N bond), 11-demethoxygelsemazonamide (N=N bond), obovatine, 12,12'-Bis[11-hydroxycoronaridine]-12, pendulifloramine, blumeanine, tetrastachyne (ether bond), 14-dehydrotetrastachyne (ether bond), tetrastachynine, 14-dehydrotetrastachynine, bousangustine C, cimilophytine, cimiduphytine, norisohaplophytine, haplocidiphytine, haplophytine, crooksiine, cimiciphytine, norcimiciphytine |
| 3.1.3. Enamine reactivity            |                                                                                                                                                 |                                                                                                                                                                                                                                                                                                                                                                                                                                                                                                                                                                                                                                                                                                                                                                                                                |
| 1                                    | Enamine nucleophilic attack onto quinone methide                                                                                                | inaequalisines A-B                                                                                                                                                                                                                                                                                                                                                                                                                                                                                                                                                                                                                                                                                                                                                                                             |
| 1                                    | Enamine nucleophilic attack onto aldehyde (or ketone)                                                                                           | serpentinine, 20'-episerpentinine, 16'-demethoxy- <i>epi</i> -serpentinine, alstonine-6-ethylpropionate (presumed dimer catabolite), moandaensine, moandaensines B-C, gelsekoumidines A-B, gelsecorydine A, gelsecorydines C-E, gelsekoumidine A, alstorupine A (ketone), gelsegedines A-B, <b>neonaucleosides B-C</b> (+ oxidation and lactonization for neonaucleoside C), <b>hirsutaside D</b> , <b>gelsevanillidine</b> , <b>gelsesyringalidine</b> , gelselegandines A-C, gelsefuranidine, 14-deoxygelsefuranidine, gelsefuranidines D-E                                                                                                                                                                                                                                                                  |
| 1                                    | Enamine nucleophilic attack onto formaldehyde                                                                                                   | kopoffines A-B (dienamine), bousangustines A-B (dienamine), geleganimine A (+ epoxidation and enamine reactivity), geleganimine B                                                                                                                                                                                                                                                                                                                                                                                                                                                                                                                                                                                                                                                                              |
| 1                                    | Enamine nucleophilic attack onto iminium                                                                                                        | panganensines R-S (dienamine), gabonine, arbolodinine A, melosine A, paucivenine                                                                                                                                                                                                                                                                                                                                                                                                                                                                                                                                                                                                                                                                                                                               |
| 1                                    | Enamine nucleophilic attack onto $\alpha,\beta$ -unsaturated carbonyl                                                                           | <b>gelsamydine</b> , <b>14<math>\alpha</math>-hydroxygelsamydine</b> , <b>19<math>\alpha</math>-hydroxygelsamydine</b> , <b>elegansamine</b> , <b>14-hydroxyelegansamine</b> , <b>eleganine A</b> , <b>gelsegansymines A-B</b>                                                                                                                                                                                                                                                                                                                                                                                                                                                                                                                                                                                 |
| 1                                    | Trienamine nucleophilic attack via 1,6 addition                                                                                                 | vobparicine, 19,20-dihydrovobparicine, vobparicine N <sub>4</sub> -oxide                                                                                                                                                                                                                                                                                                                                                                                                                                                                                                                                                                                                                                                                                                                                       |
| 3.1.4. (Hetero)nucleophilic coupling |                                                                                                                                                 |                                                                                                                                                                                                                                                                                                                                                                                                                                                                                                                                                                                                                                                                                                                                                                                                                |
| 1                                    | Heteronucleophilic coupling following Ring-closure driven nucleophilic attack into formaldehyde +/- double bond regeneration via ring reopening | voacinol, voacandimine C, biscarpamontamine A                                                                                                                                                                                                                                                                                                                                                                                                                                                                                                                                                                                                                                                                                                                                                                  |

|   |                                                                                                          |                                                                                                                                                                                                                                                                                                                                                                                                                                                                                                                                                                                                                                                                                                                                                                                                                                                                                                                                                                                                                                                                                                                                                                                                                                                                                                                                                                                                                                                                                                                                                                                                                                                                                                               |
|---|----------------------------------------------------------------------------------------------------------|---------------------------------------------------------------------------------------------------------------------------------------------------------------------------------------------------------------------------------------------------------------------------------------------------------------------------------------------------------------------------------------------------------------------------------------------------------------------------------------------------------------------------------------------------------------------------------------------------------------------------------------------------------------------------------------------------------------------------------------------------------------------------------------------------------------------------------------------------------------------------------------------------------------------------------------------------------------------------------------------------------------------------------------------------------------------------------------------------------------------------------------------------------------------------------------------------------------------------------------------------------------------------------------------------------------------------------------------------------------------------------------------------------------------------------------------------------------------------------------------------------------------------------------------------------------------------------------------------------------------------------------------------------------------------------------------------------------|
| 1 | $\Delta^{14,15}$ hydration-driven nucleophilic attack into iminium (or ring closure driven)              | voafrines A and B, 3-hydroxy-14'-(3 $\alpha''$ -tabersonyl)voafrine B, voacafrines A-G, 3-oxovoafriine B, melosine B, melosine H, melosuavine I, melodinusines A and B, tabernaemontines A-K, bis-19 $\beta$ -hydroxyvenalstonidine, sungucine, isosungucine, 18-hydroxysungucine, 18-hydroxyisosungucine, Melodinusines B, Tabernaemontines A-K, Sungucine, isosungucine, 18-hydroxysungucine, 18-hydroxyisosungucine, strychnogucine A (ring-closure driven), strychnogucine B, strychnogucine C (ring-closure driven), suadimins A-B, suadimins D-G, H, nitaphylline                                                                                                                                                                                                                                                                                                                                                                                                                                                                                                                                                                                                                                                                                                                                                                                                                                                                                                                                                                                                                                                                                                                                       |
| 1 | Heteronucleophilic attack (onto aldehydic or alcohol carbon)                                             | neonaucleoside A (= bahienoside A), bousigionines E-F, mappidoside I (S-triggered)                                                                                                                                                                                                                                                                                                                                                                                                                                                                                                                                                                                                                                                                                                                                                                                                                                                                                                                                                                                                                                                                                                                                                                                                                                                                                                                                                                                                                                                                                                                                                                                                                            |
| 1 | heteronucleophilic attack into iminium                                                                   | kisantine (O-triggered), celastromeline (N-triggered),                                                                                                                                                                                                                                                                                                                                                                                                                                                                                                                                                                                                                                                                                                                                                                                                                                                                                                                                                                                                                                                                                                                                                                                                                                                                                                                                                                                                                                                                                                                                                                                                                                                        |
| 1 | Nucleophilic attack of dienol ether onto iminium                                                         | macrocarpamine, 10-methoxymacrocarpamine, 10-methoxymacrocarpamine N <sub>4</sub> -oxide, angustilongine L, pandicine, alstomaphylline J.                                                                                                                                                                                                                                                                                                                                                                                                                                                                                                                                                                                                                                                                                                                                                                                                                                                                                                                                                                                                                                                                                                                                                                                                                                                                                                                                                                                                                                                                                                                                                                     |
| 1 | Heteronucleophilic coupling onto formaldehyde                                                            | melofusine I, Nb, Nb'-methylenebismeloninium, geleganidine C                                                                                                                                                                                                                                                                                                                                                                                                                                                                                                                                                                                                                                                                                                                                                                                                                                                                                                                                                                                                                                                                                                                                                                                                                                                                                                                                                                                                                                                                                                                                                                                                                                                  |
| 1 | Heteronucleophilic attack via conjugate addition 1,6                                                     | hazuntamine, vobasonidine, bisnicalaterine A, theionbrunonines A-C (S-triggered), pagisulfine, hemitheion                                                                                                                                                                                                                                                                                                                                                                                                                                                                                                                                                                                                                                                                                                                                                                                                                                                                                                                                                                                                                                                                                                                                                                                                                                                                                                                                                                                                                                                                                                                                                                                                     |
| 1 | Nucleophilic attack onto iminium (X2) (triggered by acetone as an extraneous unit)                       | tabercrassine A, 3,3'-(oxopropyl)diconaridine                                                                                                                                                                                                                                                                                                                                                                                                                                                                                                                                                                                                                                                                                                                                                                                                                                                                                                                                                                                                                                                                                                                                                                                                                                                                                                                                                                                                                                                                                                                                                                                                                                                                 |
| 1 | Heteronucleophilic attack onto $\alpha,\beta$ -unsaturated ketone or $\alpha,\beta$ -unsaturated iminium | angustiphylline (after Polonovski-Potier fragmentation), arbolodinine B, alstomacroline, alsmaphyllines B-C, scholaphylline, alstomaphyllines D-E, rankiniridine, humanteniridine, gelseiridone, gelseganines A-D, gelsebanine                                                                                                                                                                                                                                                                                                                                                                                                                                                                                                                                                                                                                                                                                                                                                                                                                                                                                                                                                                                                                                                                                                                                                                                                                                                                                                                                                                                                                                                                                |
| 1 | Esterification with C6-C1, C6-C3 units, anthranilate derivatives                                         | 19-epi-(+)-echitoveniline, echitoveniline, 11-methoxyechitoveniline, echitoserpidine, echitoserpine, maireines A-B, ajmalimine, O-benzoylvincamajine, vincamajine-17-O-veratrate, vincamajine-17-O-veratrate N <sub>4</sub> -oxide, O-(4-Hydroxy-3,5-dimethoxybenzoyl)vincamajine, O-(3,4,5-trimethoxybenzoyl)vincamajine, O-(3,4,5-trimethoxybenzoyl)vincamajine N <sub>4</sub> -oxide, (3,4,5-trimethoxybenzoyl)quebrachidine, 10-Hydroxy-O <sup>17</sup> -(3,4,5-trimethoxybenzoyl)vincamajine, rauvomitine, norrauvoimitine, 3,4,5-trimethoxybenzoylseredamine, 3,4,5-Trimethoxycinnamoylvincamajine, 10-hydroxy-O <sup>17</sup> -(3,4,5-trimethoxycinnamoyl)vincamajine, 10-methoxy-O <sup>17</sup> -(3,4,5-trimethoxycinnamoyl)vincamajine, alstiphyllanines B-F, O-(3,4,5-Trimethoxybenzoyl)burnamine, alstiyunnanenine B, 10-methoxy-N <sub>3</sub> -methylburnamine 17-O-benzoate, 10-Methoxy-N <sub>3</sub> -methylburnamine 17-O-veratrate, rauvoyunine C, 10,11-dimethoxy-1-methyldeacetylpicraline benzoate, O-(3,4,5-trimethoxybenzoyl)-(Z)-burnamine, lanciferine, 10-hydroxylanciferine, 10-methoxylanciferine, raugustine, isoraunescine, alstorupine B, alstomairine E, reserpine, renoxydine, pseudoreserpine, 3-isoreserpine, 16,17-diepipseudoreserpine, 3,4-dimethoxybenzoylreserpine acid methyl ester, veneserpine, deserpidine, deserpideine, raujemidine, raunescine, alstomairines F-G, anthraserpine, dimethoxyanthraserpine, pseudoanthraserpine, desanthraserpine, dimethoxydesanthraserpine, rescinnamine, rescidine, rescinnamidine, 3-epirescinnamine, rhyncophine, rubescine, 6'-trans-feruloyllyaloside, 6'-trans-sinapoyllyaloside, ophiorrhiside C, mappidoside J, 21-O- |

|                                                                                                                                          |                                                                                                                                                 |                                                                                                                                                                                                                                                                                                                                                                                                                                                                                      |
|------------------------------------------------------------------------------------------------------------------------------------------|-------------------------------------------------------------------------------------------------------------------------------------------------|--------------------------------------------------------------------------------------------------------------------------------------------------------------------------------------------------------------------------------------------------------------------------------------------------------------------------------------------------------------------------------------------------------------------------------------------------------------------------------------|
|                                                                                                                                          |                                                                                                                                                 | Syringoyl-(3 <i>S</i> ,4 <i>S</i> ,15 <i>S</i> ,20 <i>R</i> )-antirhine N <sub>4</sub> -oxide-4'-O-β-D-glucopyranoside, 21-O-syringoylantirhine, 21-O-syringoyl-(3 <i>S</i> ,4 <i>S</i> ,15 <i>S</i> ,20 <i>R</i> )-antirhine 4'-O-β-D-glucopyranoside, 21-O-syringoylantirhine 4'-O-[6''-O-syringoyl]-β-D-glucopyranoside, 21-O-syringoylantirhine 4'-O-[(E)-6''-O-sinapoyl]-β-D-glucopyranoside, 21-O-syringoylantirhine 4'-O-[6''-O-feruloyl]-β-D-glucopyranoside, foetidins I-II |
| 1                                                                                                                                        | Amidification                                                                                                                                   | <i>N</i> -benzoylcylindrocarine, <i>N</i> -benzoyldemethoxycylindrocarine, <i>N</i> -benzoyl-19-hydroxycylindrocarine, <i>N</i> -cinnamoyldemethoxycylindrocarine, cylindrocarpine, <i>N</i> -dihydrocinnamoyl-19-hydroxycylindrocarpine, <i>N</i> -cinnamoyl-19-hydroxycylindrocarpine, alstiphyllanines I-O                                                                                                                                                                        |
| <b>3.2.1. Doubly tethered oligomers resulting from an electrophilic aromatic substitution associated to an heteronucleophilic attack</b> |                                                                                                                                                 |                                                                                                                                                                                                                                                                                                                                                                                                                                                                                      |
| 2                                                                                                                                        | Electrophilic aromatic substitution (onto quinone methide) + lactonization                                                                      | kanluaengosides C-D                                                                                                                                                                                                                                                                                                                                                                                                                                                                  |
| 2                                                                                                                                        | Electrophilic aromatic substitution α,β-unsaturated carbonyle + hemiketalization + ketalization                                                 | angustilongines G-H, lumutinines A-E, macralstonidine                                                                                                                                                                                                                                                                                                                                                                                                                                |
| 2                                                                                                                                        | Electrophilic aromatic substitution α,β-unsaturated carbonyle + hemiacetalization + acetalization                                               | Alstocraline, foliacraline, angustilongine B, macrospogatrine,                                                                                                                                                                                                                                                                                                                                                                                                                       |
| 2                                                                                                                                        | Electrophilic aromatic substitution via conjugate addition 1,6 + heteronucleophilic attack on addition 1,6                                      | divaricamine A, ervadivamine A                                                                                                                                                                                                                                                                                                                                                                                                                                                       |
| 2                                                                                                                                        | Electrophilic aromatic substitution (onto iminium 3,4) + heteronucleophilic annulation (onto epoxide)                                           | Conophylline, conophyllidine, conophyllinine, conofolidine, polyervinine, conolodinines A-D, melodinine K, 19-hydroxymelodinine K, taberyunines A-C, Taberdivarine A, Taberdivarine B, taberdivarines C-G, taberdisine C                                                                                                                                                                                                                                                             |
| 2                                                                                                                                        | Electrophilic aromatic substitution (onto iminium 1,16) + heteronucleophilic annulation                                                         | bisleuconothine B                                                                                                                                                                                                                                                                                                                                                                                                                                                                    |
| 2                                                                                                                                        | Electrophilic aromatic substitution (10-formylation) + enamine nucleophilic attack OR Heteronucleophilic attack + heteronucleophilic annulation | goniomedines A-B, goniomedine A <i>N</i> -oxide, goniomedinone, hunzeylanines A-E, melomorsine (electrophilic aromatic substitution + Heteronucleophilic attack + heteronucleophilic annulation)                                                                                                                                                                                                                                                                                     |
| <b>3.2.2. Doubly tethered oligomers resulting from two electrophilic aromatic substitution</b>                                           |                                                                                                                                                 |                                                                                                                                                                                                                                                                                                                                                                                                                                                                                      |
| 2                                                                                                                                        | Double electrophilic aromatic substitutions onto iminiums                                                                                       | bousigonine B, vincarostine A                                                                                                                                                                                                                                                                                                                                                                                                                                                        |
| <b>3.2.3. <i>N</i>-mediated heteronucleophilic attack doubly tethered oligomers</b>                                                      |                                                                                                                                                 |                                                                                                                                                                                                                                                                                                                                                                                                                                                                                      |
| 2                                                                                                                                        | Heteronucleophilic attack (1-formamide) + enamine nucleophilic attack + electrophilic aromatic substitution                                     | pycnanthinine, huncaniterines A-B, 16-epipleiomutinine, N <sub>4</sub> -chloromethylpleiomutinine, pycnanthine, pleiomutinine, 19'-epipleiomutinine, contortarine A                                                                                                                                                                                                                                                                                                                  |
| 2                                                                                                                                        | (Heteronucleophilic attack) Aza-Michael 1,4 + hemiketalization + electrophilic aromatic substitution                                            | alstonisidine, alsmaphyline A                                                                                                                                                                                                                                                                                                                                                                                                                                                        |
| 2                                                                                                                                        | Heteronucleophilic attack Aza-Michael 1,4 + electrophilic aromatic substitution                                                                 | bisleucocurine A                                                                                                                                                                                                                                                                                                                                                                                                                                                                     |
| 2                                                                                                                                        | Stepwise Aza-Michael                                                                                                                            | leucoridines A-C, leucoridine A <i>N</i> -oxide, leucofoline, hazuntiphyllidine (DMSO- <i>d</i> <sub>6</sub> ), anhydrohazuntiphyllidine                                                                                                                                                                                                                                                                                                                                             |
| 2                                                                                                                                        | Mannich-type reactivity + enamine reactivity + dehydration                                                                                      | gelsechizine A                                                                                                                                                                                                                                                                                                                                                                                                                                                                       |
| 2                                                                                                                                        | Mannich-type reactivity + Aza-Michael addition                                                                                                  | gelsechizine B                                                                                                                                                                                                                                                                                                                                                                                                                                                                       |

|   |                                                                                             |                                                                                                                                                                                                                                                                                                                                                                                                                                                                                                                                                                                                                                                                                                                                                                                                                                                                                                                                                                                                                                                                                                                                                                                                                                                                                                                                                                                                                                                                                                                                                                                                                                                                                                                                                                                                          |
|---|---------------------------------------------------------------------------------------------|----------------------------------------------------------------------------------------------------------------------------------------------------------------------------------------------------------------------------------------------------------------------------------------------------------------------------------------------------------------------------------------------------------------------------------------------------------------------------------------------------------------------------------------------------------------------------------------------------------------------------------------------------------------------------------------------------------------------------------------------------------------------------------------------------------------------------------------------------------------------------------------------------------------------------------------------------------------------------------------------------------------------------------------------------------------------------------------------------------------------------------------------------------------------------------------------------------------------------------------------------------------------------------------------------------------------------------------------------------------------------------------------------------------------------------------------------------------------------------------------------------------------------------------------------------------------------------------------------------------------------------------------------------------------------------------------------------------------------------------------------------------------------------------------------------|
| 2 | Double Mannich-type reactivity (double hemiaminalization) + double dehydration              | toxiferine I (C-toxiferine I, Toxiferine V or Toxiferine XI), C-alkaloid H, Caracurine VI (bisnor-C-alkaloid H, 18-hydroxynordihydrotoxiferine or dinor-C-alkaloid H), bisnor-C-alkaloid H <i>N</i> -oxide, bisnor-C-alkaloid H di- <i>N</i> -oxide, 18,18'-dideoxytoxiferine I (C-deoxytoxiferine, C-alkaloid K or C-dihydrotoxiferine I), bisnordihydrotoxiferine (4,4'-dimethyl-18,18'-dideoxytoxiferine I), bisnordihydrotoxiferine <i>N</i> -oxide, bisnordihydrotoxiferine di- <i>N</i> -oxide, gardovatine                                                                                                                                                                                                                                                                                                                                                                                                                                                                                                                                                                                                                                                                                                                                                                                                                                                                                                                                                                                                                                                                                                                                                                                                                                                                                        |
| 2 | Double Mannich-type reactivity (double hemiaminalization) + dehydrative cyclizations (side) | caracurine V, caracurine V mono-oxide, caracurine V di-oxide                                                                                                                                                                                                                                                                                                                                                                                                                                                                                                                                                                                                                                                                                                                                                                                                                                                                                                                                                                                                                                                                                                                                                                                                                                                                                                                                                                                                                                                                                                                                                                                                                                                                                                                                             |
| 2 | Mannich-type reactivity + dehydrative cyclization OR aldolization                           | longicaudatine, longicaudatine F, longicaudatine Y, 3',4',5',6'-tetrahydrolongicaudatine Y, longicaudatine Z, dihydrolongicaudatine, dihydrolongicaudatine Y, 3-hydroxylongicaudatine Y, longicaudatine N <sub>4</sub> -oxide, guianensine, guaiflavine, guiachryrine, 5',6'-dehydroguaichryrine, 5',6'-dehydroguaiflavine, strychnochryrine, demethoxyguaiflavine, N <sub>b</sub> -methyl-longicaudatine, strychnoflavine, afrocurarine                                                                                                                                                                                                                                                                                                                                                                                                                                                                                                                                                                                                                                                                                                                                                                                                                                                                                                                                                                                                                                                                                                                                                                                                                                                                                                                                                                 |
| 2 | Aza-Michael 1,4 + heteronucleophilic annulation                                             | strellidimine                                                                                                                                                                                                                                                                                                                                                                                                                                                                                                                                                                                                                                                                                                                                                                                                                                                                                                                                                                                                                                                                                                                                                                                                                                                                                                                                                                                                                                                                                                                                                                                                                                                                                                                                                                                            |
| 2 | Aza-Michael 1,4 + aldolization                                                              | strychnobaillonine                                                                                                                                                                                                                                                                                                                                                                                                                                                                                                                                                                                                                                                                                                                                                                                                                                                                                                                                                                                                                                                                                                                                                                                                                                                                                                                                                                                                                                                                                                                                                                                                                                                                                                                                                                                       |
| 2 | Hemiaminalization (+ heteronucleophilic annulation)                                         | geissospermine, 3',4',5',6'-tetrahydrogeissospermine, geissolosimine, divaricine, strychnobiline, isostrychnobiline, 12'-hydroxystrychnobiline, 16,17-dehydroisostrychnobiline, 12'-hydroxyisostrychnobiline, ligustrinine, gardmultine, 18-demethoxygardmultine                                                                                                                                                                                                                                                                                                                                                                                                                                                                                                                                                                                                                                                                                                                                                                                                                                                                                                                                                                                                                                                                                                                                                                                                                                                                                                                                                                                                                                                                                                                                         |
| 2 | Pictet-Spengler + heteronucleophilic attack (heminalization) + dehydration                  | usambarine, usambarensine, 10-hydroxyusambarine, N <sub>b</sub> -methyl-10-hydroxyusambarine, N <sub>b</sub> -methyl-11-hydroxyusambarine, 10'-hydroxyusambarensine, 4',17-dihydro-17 $\alpha$ -tchibangensine, 4',17-dihydro-17 $\beta$ -tchibangensine, 10'-hydroxy-4',17-dihydro-17 $\alpha$ -tchibangensine, N <sub>b</sub> -oxide-usambarensine, N <sub>b</sub> -methylusambarensine, 3',4'-dihydrousambarensine N <sub>b</sub> -oxide (=5',6'-dihydrousambarensine <i>N</i> -oxide), N <sub>b</sub> -Methyl-3',4'-dihydrousambarensine (= N <sub>b</sub> -methyltchibangensine), N <sub>2</sub> -methyl-3',4'-dihydrousambarensine (=N <sub>2</sub> -methyltchibangensine), 19,20( $\beta$ )-dihydro-usambarensine, N <sub>b</sub> -carbomethoxy-17 <i>R</i> -tetrahydrousambarensine, N <sub>b</sub> -carboethoxy-17 <i>R</i> -tetrahydrousambarensine, 4',5',6',17-tetrahydro-17 <i>R</i> -usambarensine <i>N</i> -oxide, tchibangensine (3',4'-dihydro-usambarensine = 3',4'-Dihydrousambarensine = 5',6'-dihydrousambarensine), ramiflorines A-B, 6',10-dihydroxy,1'S,2',3',4'-tetrahydro-usambarensine = 10,10'-dihydroxytetrahydrousambarensine, N <sub>2</sub> -Me-usambarensine = 10,10'-dihydroxy-N <sub>4</sub> -methyltetrahydrousambarensine, 10-hydroxy-10'-methoxytetrahydrousambarensine, 10-hydroxy-10'-methoxy-N <sub>4</sub> -methyltetrahydrousambarensine, 10,10'-dimethoxytetrahydrousambarensine, 10,10'-dimethoxy-N <sub>4</sub> -methyltetrahydrousambarensine, 1',2',3',4'-tetrahydro-6'-hydroxy-10-methoxy-N <sub>2</sub> -methylusambarensine (= 10'-Hydroxy-10-methoxy-N <sub>4</sub> -methyl-17,4',5',6'-tetrahydrousambarensine), buchtienine, cinchophylline, isocinchophylline, 17-epicinchophyllamine, 3-epiconchophyllamine, 17,4',5',6'-tetrahydro-3 $\alpha$ - |

|                                                                                          |                                                                                                                                                                                      |                                                                                                                                                                                                                                                                                                                                                                                                                                                                                                                                                                                                                          |
|------------------------------------------------------------------------------------------|--------------------------------------------------------------------------------------------------------------------------------------------------------------------------------------|--------------------------------------------------------------------------------------------------------------------------------------------------------------------------------------------------------------------------------------------------------------------------------------------------------------------------------------------------------------------------------------------------------------------------------------------------------------------------------------------------------------------------------------------------------------------------------------------------------------------------|
|                                                                                          |                                                                                                                                                                                      | cinchophyllamine (tetradehydroisocinchophyllamine), dehydroisocinchophyllamine, 18,19-dihydro-3 $\beta$ ,17 $\beta$ -cinchophyllamine, strychnopentamine, isostrychnopentamine A, ochrolifuanines A-F, 18-dehydroochrolifuanine A, 18-dehydroochrolifuanine E, 18-dehydroochrolifuanine F, nigritanine (=18,19-dihydrousambarine), 18,19-dihydrousambaridine Vi, 10-methoxy,18,19-didehydro-ochrolifuanine B, 18,19-dihydrousambaridine Br., usambaridine Br., strychnofoline, isostrychnofoline, barterine, 10-hydroxybarterine, taipinisine, strychnophylline, isostrychnophylline, chrysopentamine                    |
| 2                                                                                        | Carbamoylation + heteronucleophilic attack onto iminium                                                                                                                              | gelstriamine A                                                                                                                                                                                                                                                                                                                                                                                                                                                                                                                                                                                                           |
| <b>3.2.4. C- and O-mediated nucleophilic attack generating doubly tethered oligomers</b> |                                                                                                                                                                                      |                                                                                                                                                                                                                                                                                                                                                                                                                                                                                                                                                                                                                          |
| 2                                                                                        | $\Delta^{14,15}$ hydration-driven nucleophilic attack into iminium heteronucleophilic annulation into other iminium= doubly tethered                                                 | suadimin C                                                                                                                                                                                                                                                                                                                                                                                                                                                                                                                                                                                                               |
| 1                                                                                        | Aldolization                                                                                                                                                                         | voacalgine D (+ hemiketalization), voacalgine E (+ Oxa-Michael 1,4)                                                                                                                                                                                                                                                                                                                                                                                                                                                                                                                                                      |
| 2                                                                                        | Ring-closure driven Michael addition + heteronucleophilic annulation (into iminium 3,4)                                                                                              | voacandimine A                                                                                                                                                                                                                                                                                                                                                                                                                                                                                                                                                                                                           |
| 2                                                                                        | Ring-closure driven nucleophilic attack into formamide + double bond regeneration via ring reopening + ring closure driven double bond nucleophilic attack onto methylester carbonyl | vobtusine, biscarpamontamine B (3'-hydroxy-18-oxovobtusine, 3'-hydroxyvobtusine lactone), vobtusine lactone (10-oxovobtusine), 12-demethylvobtusine, 3'-hydroxyvobtusine, globospiramine, deoxyvobtusine lactone (2-deoxy-18-oxovobtusine), deoxyvobtusine (goziline), 3'-oxovobtusine (vobtusine lactame), N-oxide-3'-oxovobtusine, 2-deoxy-3'-oxovobtusine (2-deoxyvobtusine lactame), voafolidine, 2-deoxyvoafolidine (voafoline), 14'epimervoafolidine (isovoafolidine), 14'epimer, 2-deoxyvoafolidine (isovoafoline), owerrine (anhydrodihydroamataine), quimbeline, voacandimine B, tabernaesines A-J, vobtusamine |
| 2                                                                                        | Aldolization + dehydration + allylic oxidation + hemiketalization                                                                                                                    | strychnofuranine                                                                                                                                                                                                                                                                                                                                                                                                                                                                                                                                                                                                         |
| 2                                                                                        | Aldolization + Mannich + aldolization                                                                                                                                                | gelsepyrrodines A-C                                                                                                                                                                                                                                                                                                                                                                                                                                                                                                                                                                                                      |
| 2                                                                                        | Aldolization + Mannich                                                                                                                                                               | alstopirocine                                                                                                                                                                                                                                                                                                                                                                                                                                                                                                                                                                                                            |
| 2                                                                                        | Aldolization + hydration + hemiaminalization                                                                                                                                         | 19,20-(E)-alstoscholarine, 19,20-(Z)-alstoscholarine                                                                                                                                                                                                                                                                                                                                                                                                                                                                                                                                                                     |
| 2                                                                                        | Aldolization + tandem hemiketalization                                                                                                                                               | macrodasines A-H, voacalgine C                                                                                                                                                                                                                                                                                                                                                                                                                                                                                                                                                                                           |
| 2                                                                                        | Mannich-type heteronucleophilic attack (x2) + dehydrative etherification                                                                                                             | alstoscholarinine A                                                                                                                                                                                                                                                                                                                                                                                                                                                                                                                                                                                                      |
| 2                                                                                        | Ring-closure driven Michael addition + rearrangement<br>aspidospermane=>vallesamidine + enamine nucleophilic attack (onto indoleninium system)                                       | callichiline                                                                                                                                                                                                                                                                                                                                                                                                                                                                                                                                                                                                             |
| 2                                                                                        | Ketalization                                                                                                                                                                         | alstoniasidines A-B, latifolianine A                                                                                                                                                                                                                                                                                                                                                                                                                                                                                                                                                                                     |
| 2                                                                                        | Enolization-driven nucleophilic attack (monomer rearrangement) + amination + Mannich-type heteronucleophilic attack                                                                  | alstoscholarisine K                                                                                                                                                                                                                                                                                                                                                                                                                                                                                                                                                                                                      |
| <b>3.2.5. Doubly tethered oligomers generated through an enamine reactivity</b>          |                                                                                                                                                                                      |                                                                                                                                                                                                                                                                                                                                                                                                                                                                                                                                                                                                                          |

|                                                                                      |                                                                                                                                                                           |                                                                                                                                                                                                                                                                                                                                             |
|--------------------------------------------------------------------------------------|---------------------------------------------------------------------------------------------------------------------------------------------------------------------------|---------------------------------------------------------------------------------------------------------------------------------------------------------------------------------------------------------------------------------------------------------------------------------------------------------------------------------------------|
| 2                                                                                    | Enamine nucleophilic attack onto $\alpha,\beta$ -unsaturated ketone (Michael acceptor) + translactamization                                                               | gelseserancines B-C                                                                                                                                                                                                                                                                                                                         |
| 2                                                                                    | Enamine reactivity + Heteronucleophilic annulation onto iminium                                                                                                           | rupestrisines A-B, meloyine I                                                                                                                                                                                                                                                                                                               |
| 2                                                                                    | Enamine reactivity + Imine formation (mannich)                                                                                                                            | gelsecorydine B                                                                                                                                                                                                                                                                                                                             |
| 2                                                                                    | Enamine nucleophilic attack (Michael addition) + hemiketalization + heteronucleophilic annulation                                                                         | villalstonine, villalstonine $N_4'$ -oxide, 10-methoxyvillalstonine, 10-methoxyvillalstonine $N_4'$ -oxide, villalstonidines A-F, alstomaphyline K                                                                                                                                                                                          |
| 2                                                                                    | Enamine nucleophilic attack (conjugate addition 1,6) + heteronucleophilic annulation                                                                                      | hunterizeyline F                                                                                                                                                                                                                                                                                                                            |
| 2                                                                                    | Enamine nucleophilic attack (Michael addition (1,4) + heteronucleophilic annulation                                                                                       | voacalgine A, pleiomaltinine                                                                                                                                                                                                                                                                                                                |
| 2                                                                                    | Enamine nucleophilic attack (Michael addition (1,4) + heteronucleophilic annulation + Enamine nucleophilic attack (Michael addition (1,6) + heteronucleophilic annulation | bipleiophylline                                                                                                                                                                                                                                                                                                                             |
| 2                                                                                    | Enamine reactivity + Heteronucleophilic-driven addition 1,6 by exomethylene                                                                                               | monogagine, flabelliparine                                                                                                                                                                                                                                                                                                                  |
| 2                                                                                    | Enamine nucleophilic attack + Enolate-driven epoxide opening + lactonization                                                                                              | gelseserancine A, gelseleganin C                                                                                                                                                                                                                                                                                                            |
| 2                                                                                    | Enamine nucleophilic attack (O+) + heteronucleophilic attack on carbamate + heteronucleophilic annulation                                                                 | pleiomalicine                                                                                                                                                                                                                                                                                                                               |
| 2                                                                                    | Enamine nucleophilic attack onto aldehyde + heteronucleophilic attack on ketone                                                                                           | trirosaline                                                                                                                                                                                                                                                                                                                                 |
| 2                                                                                    | Enamine nucleophilic attack onto iminium + heteronucleophilic annulation                                                                                                  | ervafolidene, 3-epiervafolidene, ervafolidine, 3-epiervafolidine, 19'-R-hydroxyervafolidine, 19'-S-hydroxy-3-epiervafolidine                                                                                                                                                                                                                |
| <b>3.2.6. Cycloaddition and radical coupling-generated doubly tethered oligomers</b> |                                                                                                                                                                           |                                                                                                                                                                                                                                                                                                                                             |
| 2                                                                                    | Cycloaddition + Aza-conjugate addition 1,6 OR hetero-Diels Alder                                                                                                          | Presecamine, dihydropresecamine, tetrahydropresecamine, secamine, dihydrosecamine, decarbomethoxytetrahydrosecamine, tetrahydrosecamine, 16-demethoxycarbonyltetrahydrosecamine, didemethoxycarbonyltetrahydrosecamine, 16-hydroxy-16-demethoxycarbonyltetrahydrosecamine, 16-hydroxytetrahydrosecamine, kopsiyunnanine M, kopsiyunnanine A |
| 2                                                                                    | Ortho oxygenated radical coupling + dehydrative etherification                                                                                                            | peceyline, pelankine, ceylanicine                                                                                                                                                                                                                                                                                                           |
| 2                                                                                    | Radical oxidative coupling + intramolecular iminium trapping                                                                                                              | pleiocorine, N-demethylpleiocorine, pleiocraline                                                                                                                                                                                                                                                                                            |
| <b>3.3. Oligomers with a mixed tethering mode</b>                                    |                                                                                                                                                                           |                                                                                                                                                                                                                                                                                                                                             |
| Mixed tethering                                                                      |                                                                                                                                                                           | voatriafricanines A/B, alsamontamine A, strychnohexamine,                                                                                                                                                                                                                                                                                   |
| <b>3.4. Triply-tethered oligomers</b>                                                |                                                                                                                                                                           |                                                                                                                                                                                                                                                                                                                                             |
| 3                                                                                    | Double Mannich-type reactivity (double hemiaminalization) + dehydrative etherification                                                                                    | matopensine, matopensine <i>N</i> -oxide, 16-methoxyisomatopensine, 16-ethoxyisomatopensine, 18-hydroxymatopensine, 18,18'-dihydroxymatopensine                                                                                                                                                                                             |
| 3                                                                                    | Double Mannich-type reactivity (double hemiaminalization) + unilateral                                                                                                    | divarine                                                                                                                                                                                                                                                                                                                                    |



|       |                                                                                                                                                                                                                      |                                                                                             |
|-------|----------------------------------------------------------------------------------------------------------------------------------------------------------------------------------------------------------------------|---------------------------------------------------------------------------------------------|
|       | dehydration/epoxidation + hemiaminal OH-driven epoxide ring opening                                                                                                                                                  |                                                                                             |
| 3     | Double Mannich-type reactivity (double hemiaminalization) + enamine-driven C-2 dioxygenation + enamine-driven O <sub>2</sub> elimination + heteronucleophilic attack-driven iminium trapping                         | C-Alkaloid D, bisnor-C-alkaloid D, caracurine II, toxiferine IX, dolichocurine              |
| 3     | Double Mannich-type reactivity (double hemiaminalization) + double indoleninium generation + unilateral C-2 hydroxylation + heteronucleophilic attack-driven iminium trapping                                        | C-Curarine, bisnor C-Curarine, C-Alkaloid G, C-Alkaloid E                                   |
| 3     | Double Mannich-type reactivity (double hemiaminalization) + putative photochemical-generated C-C bond                                                                                                                | calebassine, C-alkaloid F, C-alkaloid A                                                     |
| 3 (2) | Pictet-Spengler + Mannich                                                                                                                                                                                            | janussines A-B, , oxojanussine (doubly-tethered deoxygenation product)                      |
| 3     | Mannich + heteronucleophilic annulation + Winterfeldt rearrangement (Bischler-Napieralski-type)                                                                                                                      | roxburghines A-E, roxburghine X,                                                            |
| 3     | Enamine nucleophilic attack (onto iminium 3,4) + heteronucleophilic annulation (iminium trapping) + heteronucleophilic annulation                                                                                    | ervafoline, 19'-hydroxyervafoline, ervafolene, 19'-hydroxyervafolene                        |
| 3     | Double aza michael + heteronucleophilic annulation                                                                                                                                                                   | Hazuntiphylline                                                                             |
| 3     | Ring-closure driven nucleophilic attack into formamide + double bond regeneration via ring reopening + ring closure driven double bond nucleophilic attack onto methylester carbonyl + heteronucleophilic annulation | Subsessiline (grandifoline ou amataine), 18-oxoamataine (subsessiline lactone), folicangine |
| 3     | (Heteronucleophilic attack) Aza-Michael 1,4 + enamine Michael addition + heteronucleophilic annulation onto iminium                                                                                                  | hazuntiphyllidine (C <sub>6</sub> D <sub>6</sub> )                                          |
| 3     | Aldolization + 2 heteronucleophilic annulation                                                                                                                                                                       | meloheanine A                                                                               |

\*Color code: no highlight = MIA/MIA or MIA/MIA/MIA or MIA/MIA/MIA, blue = MIA/tryptamine pseudodimer, green = MIA/monoterpene pseudodimer, yellow = MIA + phenylpropanoid (*sensu lato*, including lignan-derived dimers and C6-C1 derivatives) or gallate (*sensu lato*) or anthranilate, gray = MIA + other biosynthetic adduct.

### 3 The puzzling case of tenuiphylline

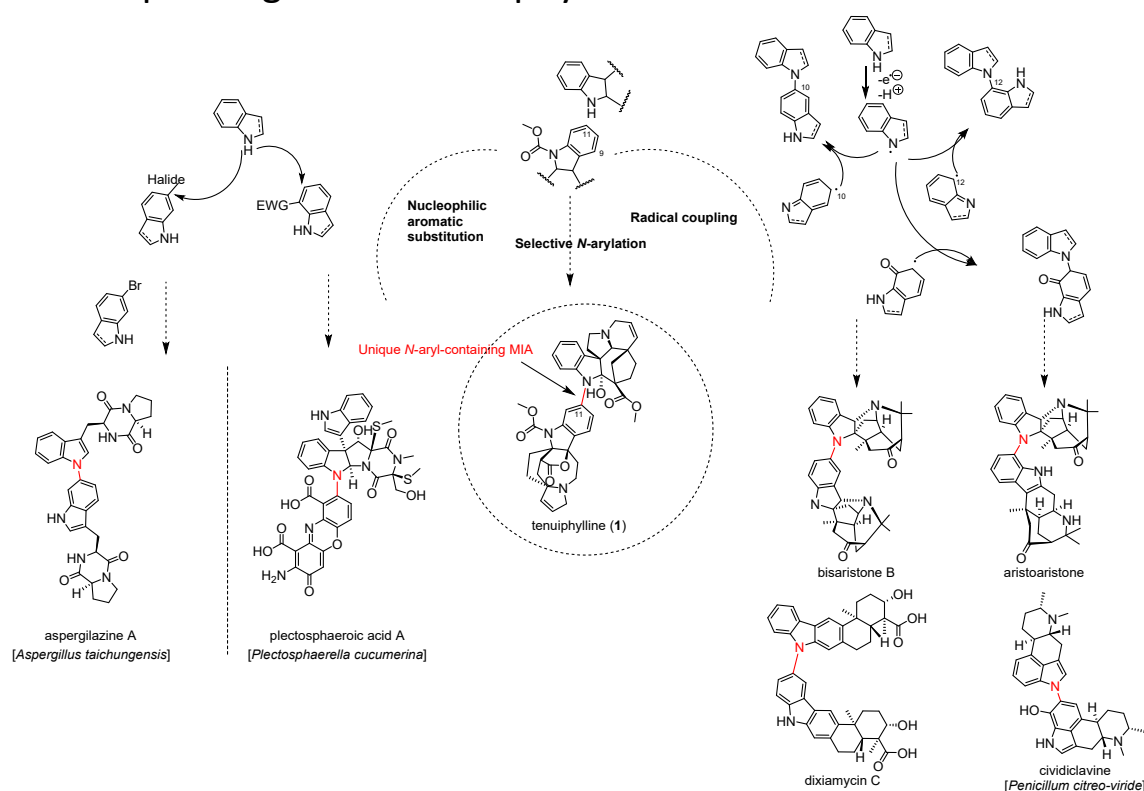

**Fig. S1.** The puzzling case of tenuiphylline intermonomeric assembly mode: comparison with some natural products revealing a C-aryl-N bonding

During this endeavour towards the classification of the MIA oligomer chemical space, only one molecule, tenuiphylline<sup>1</sup> (Fig. 1) could not be deciphered in terms of chemical logic assembly. For this reason, it has not been added in the table above. Remarkably, tenuiphylline (**1**) features a unique *N*-aryl bond among the MIA oligomer chemical space. Although this linkage (*i.e.* *N*-Aryl) is not forbidden from a biosynthetic perspective<sup>2</sup>, it requires specific structural features to follow either a radical coupling or a nucleophilic aromatic substitution.

Concerning radical coupling-mediated *N*-aryl bonding, a radical can appear at the nitrogen atom of the indoline ring or on the oxygen atom of a phenol group either by deprotonation and single-electron transfer or by abstraction of a hydrogen radical. The generated radical will give rise to a possible set of regiodivergent products with *N*-C linkages at *ortho* or *para* positions (see the examples of bisaristone B, aristoaristone, dixiamycin C and cividiclavine).<sup>3</sup> Notably, Hertweck *et al.* were able to explain the biosynthesis of *N,N*-coupled indolosesquiterpene dimers dixiamycines<sup>4</sup> following the identification of a single bacterial flavoenzyme.

Regarding nucleophilic aromatic substitution, it can occur when strong electron-withdrawing groups are *ortho* or *para*-disposed to the linking site as in the case of plectosphaeroic acid A.<sup>5</sup> Interestingly, during the total synthesis of this molecule, Overman *et al.*<sup>6</sup> used a copper-mediated *N*-arylation of an halogenated form of cinnabaric acid to install the challenging *N*-C bond. An alternative scenario for nucleophilic aromatic substitution can rely on an *N*-arylation mechanism with the presence of aryl halides. In this regard, the case of aspergilazine A<sup>7</sup> has attracted our attention because it contains an *N*-aryl bonding on a yet non compatible radical position. Moreover, it does not feature any strong electron-withdrawing groups at the *ortho* neither *para* position to the linking site. Arguably, the assembly of aspergilazine A should follow aryl halide-mediated nucleophilic aromatic substitution. Interestingly, Sperry *et al.*<sup>8</sup> ascertained the structure of aspergilazine A through its total synthesis and used a palladium-catalyzed *N*-arylation in the presence of bromobrevianamide F to forge selectively the *N*-C bond at the desired position. Due to the similarity between aspergilazine A and tenuiphylline in terms of *N*-arylation substitution pattern, it is tempting to suggest that tenuiphylline (**1**) assembly process could obey to an aryl halide-mediated nucleophilic aromatic substitution. Although aryl halides are widespread in the marine ecosystem (aspergilazine A has been isolated from a marine source) to the best of our knowledge, no natural aryl halide-containing MIA has been described to

date. The unprecedented nature of this C-N bond in the vast ensemble of MIA oligomers appeals for further spectroscopic evidence before speculating on the possible biosynthetic mechanisms by which this bond was established.

## 4 Summarized figures for MIA oligomerization chemical logic.

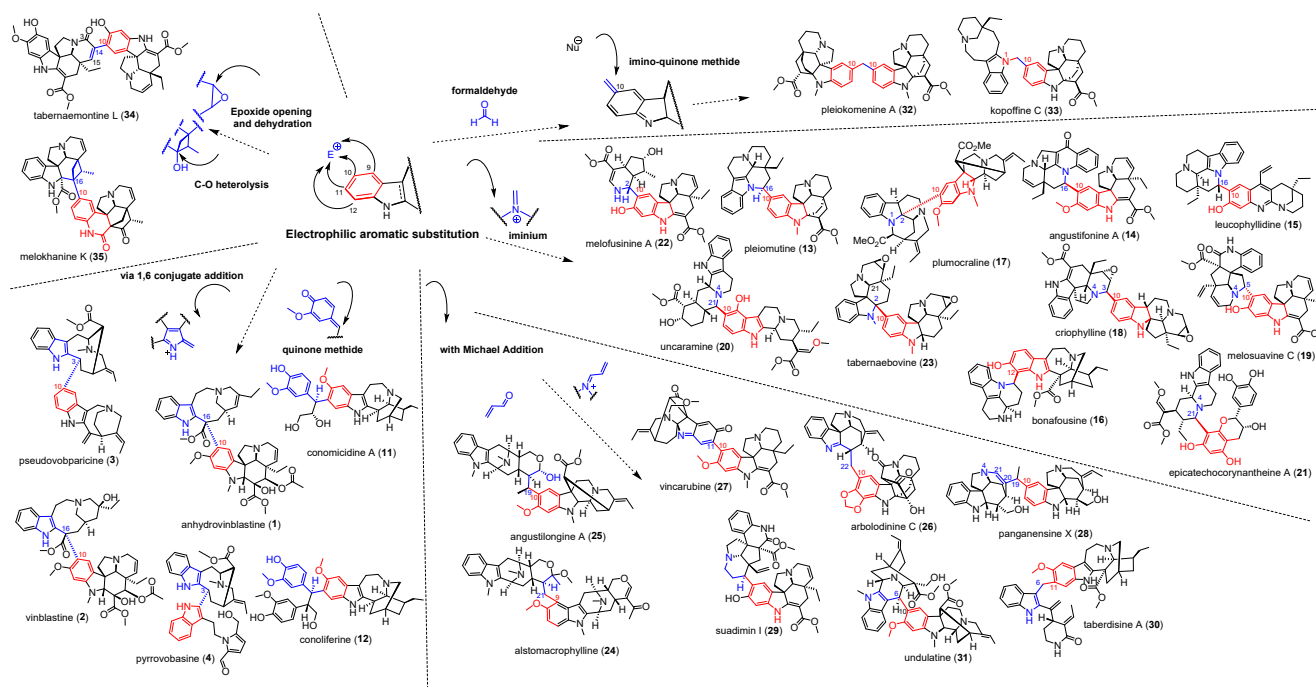

**Fig. S2** Singly tethered oligomers resulting from an electrophilic aromatic substitution reactivity (see S2 for a comprehensive listing, red- and blue-colored moieties refer to nucleophilic and electrophilic sites, respectively)

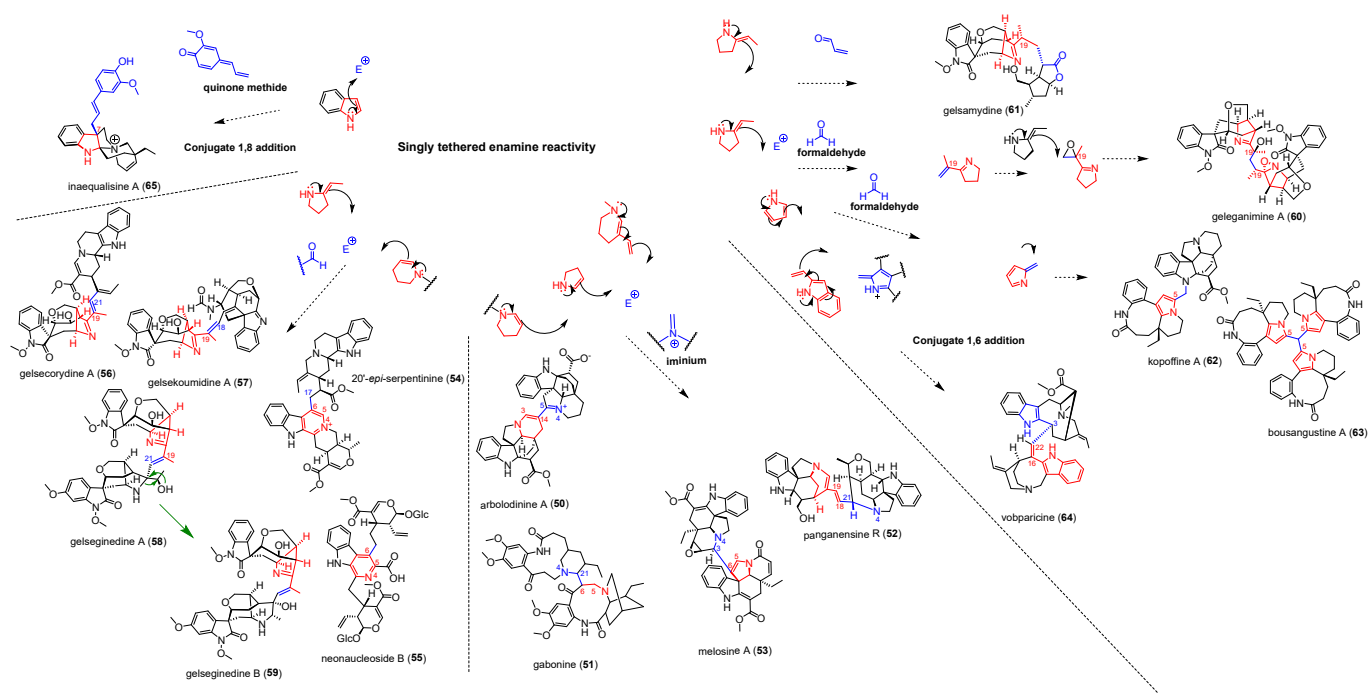

**Fig. S3** Singly tethered oligomers resulting from an enamine reactivity (see S2 for a comprehensive listing, red and blue colored moieties refer to nucleophilic and electrophilic sites, respectively)

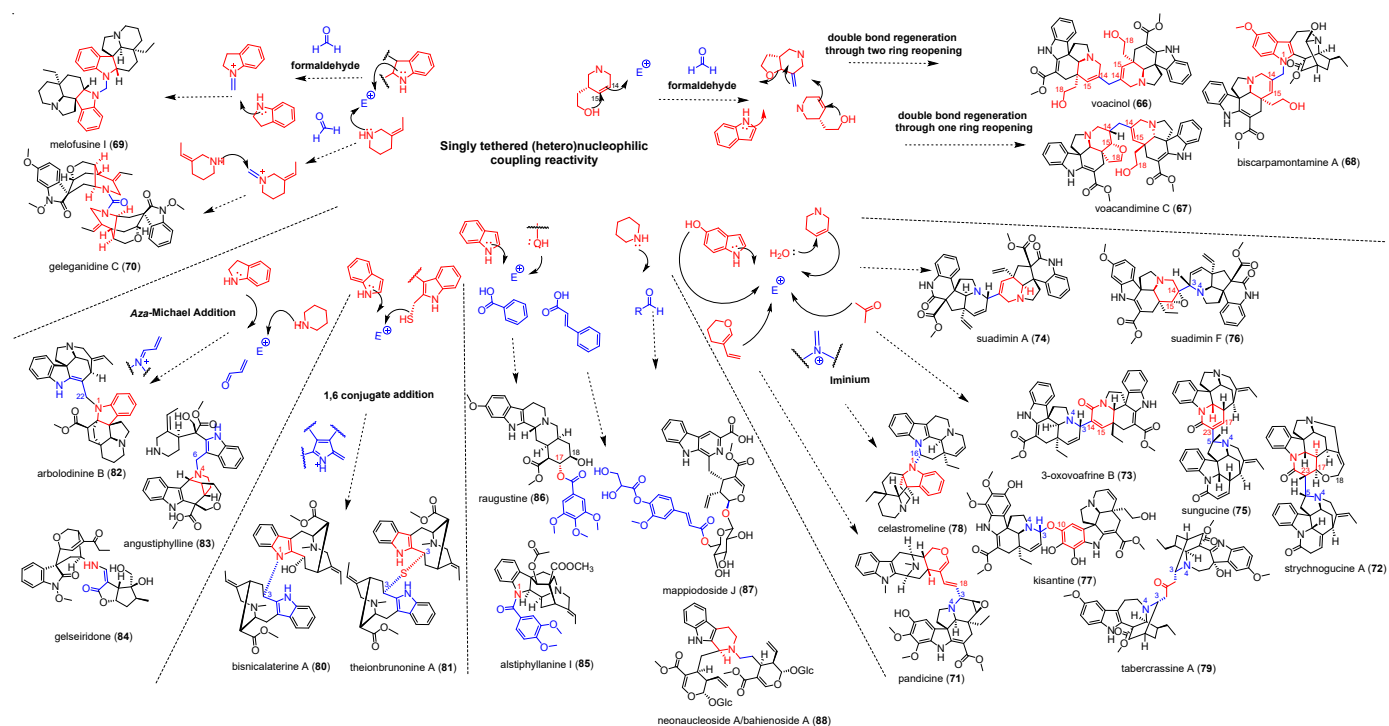

**Fig. S4** Singly tethered oligomers resulting from an (hetero)nucleophilic coupling reactivity (see S2 for a comprehensive listing, red and blue colored moieties refer to nucleophilic and electrophilic sites, respectively)

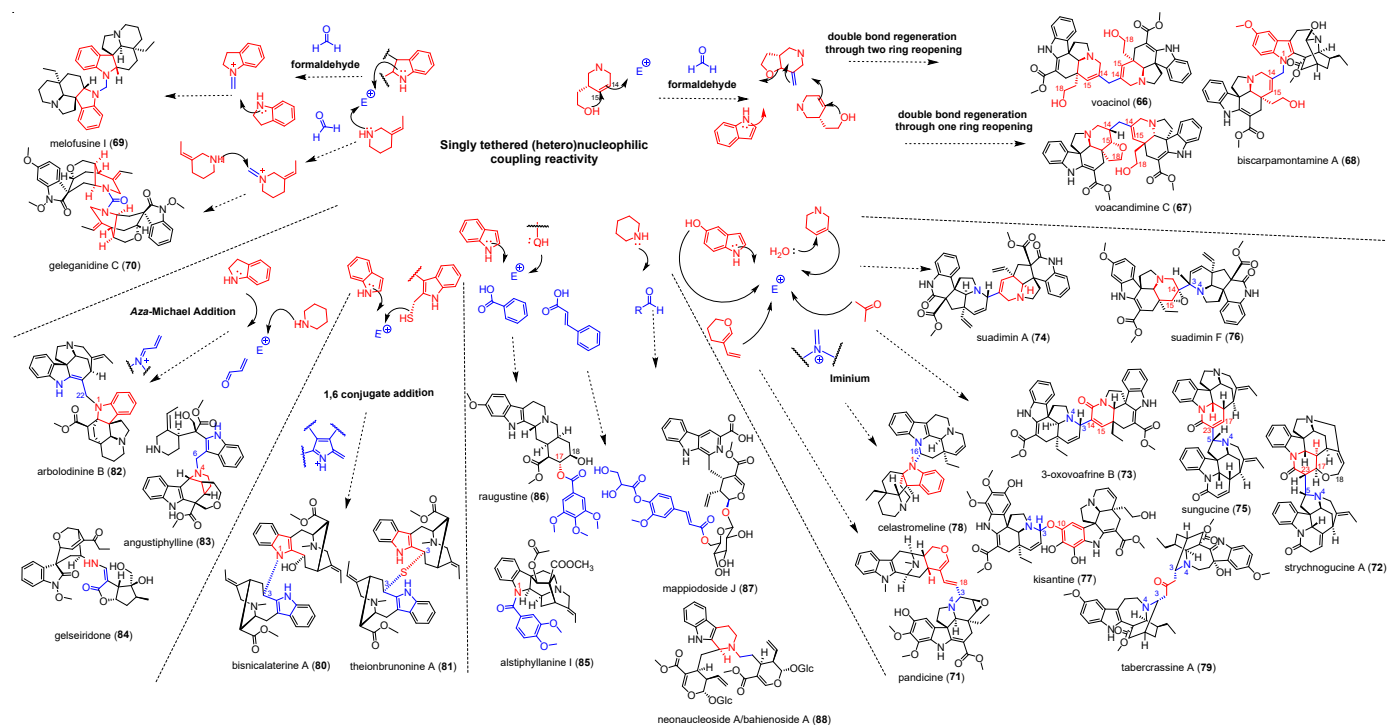

**Fig. S5** Singly tethered oligomers resulting from an (hetero)nucleophilic coupling reactivity (see S2 for a comprehensive listing, red and blue colored moieties refer to nucleophilic and electrophilic sites, respectively).

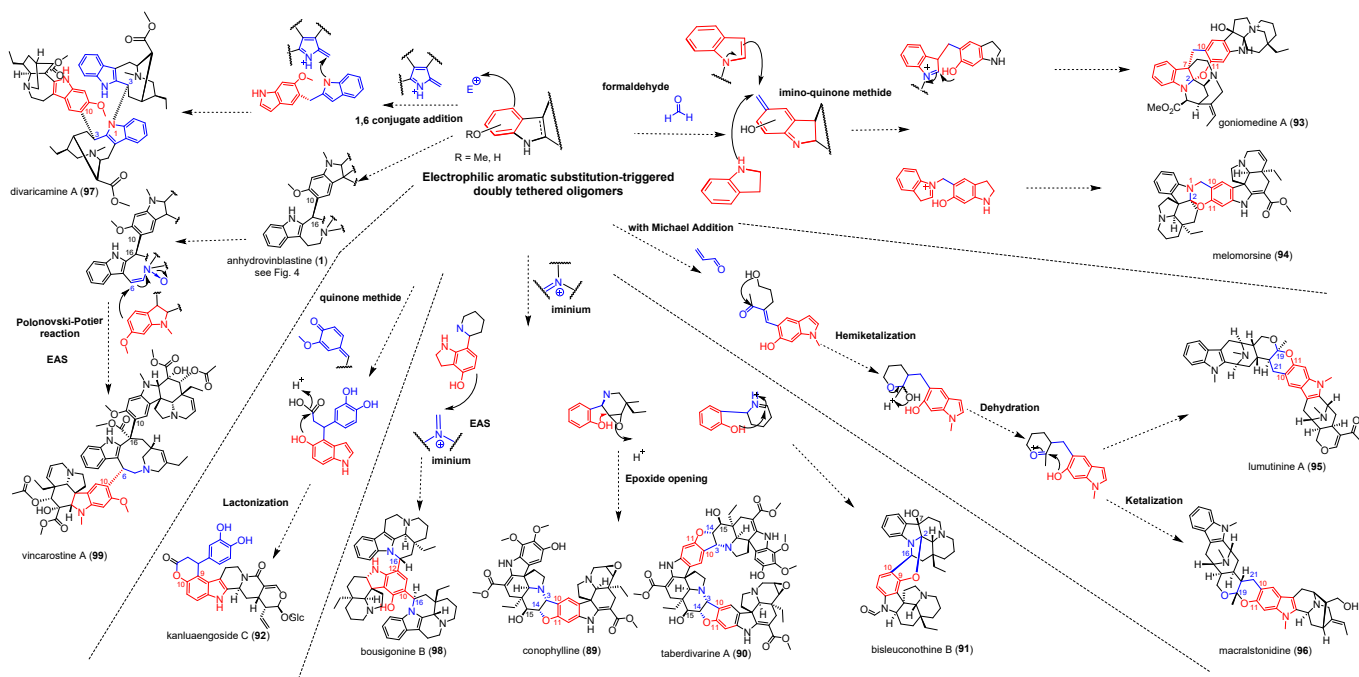

**Fig. S6** Doubly tethered oligomers resulting from an electrophilic aromatic substitution and an heteronucleophilic attack (see S2 for a comprehensive listing, red and blue colored moieties refer to nucleophilic and electrophilic sites, respectively)

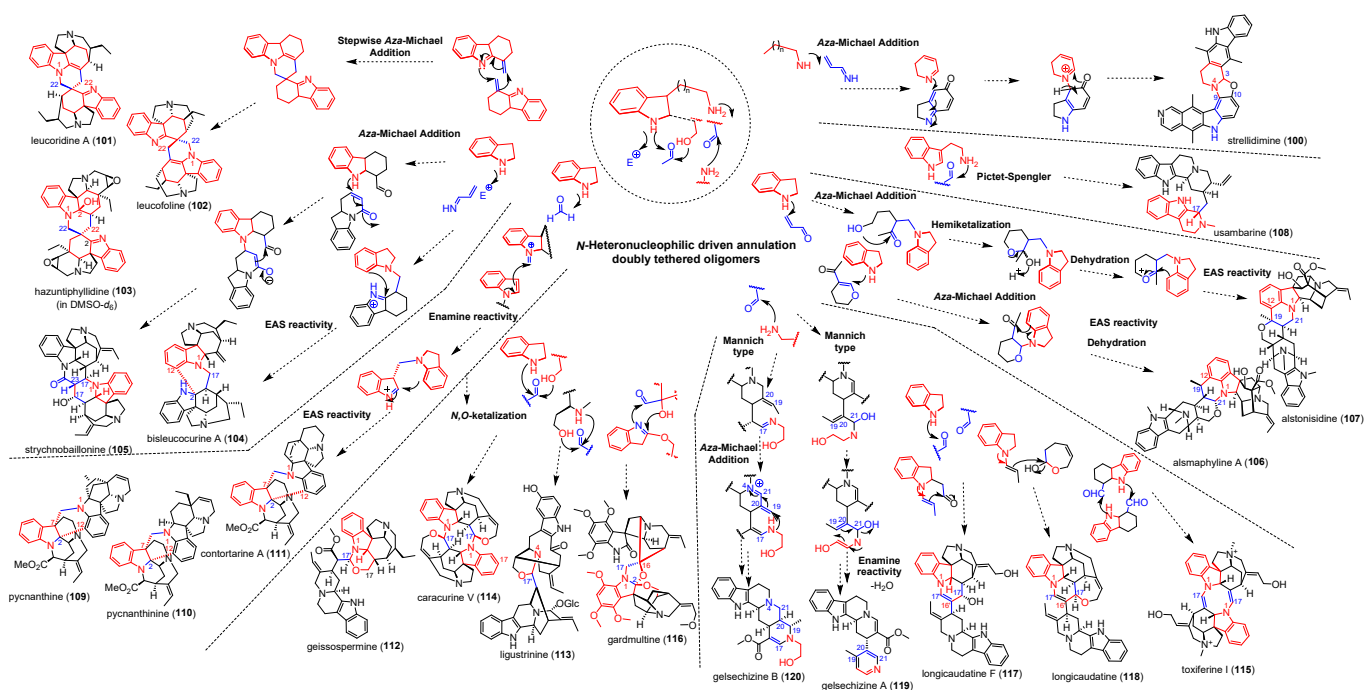

**Fig. S7** Doubly tethered oligomers resulting from *N*-mediated nucleophilic attack (see S2 for a comprehensive listing, red and blue colored moieties refer to nucleophilic and electrophilic sites, respectively).

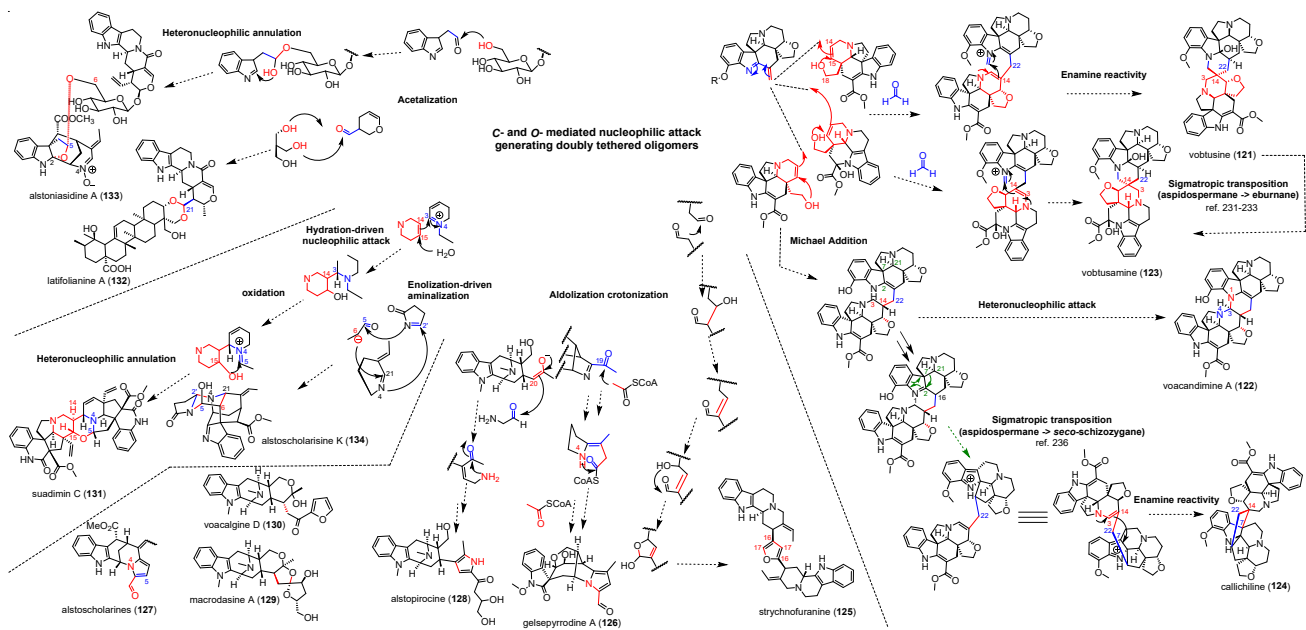

**Fig. S8** Doubly tethered oligomers resulting from C- and O-mediated nucleophilic attack (see S2 for a comprehensive listing, red and blue colored moieties refer to nucleophilic and electrophilic sites, respectively)

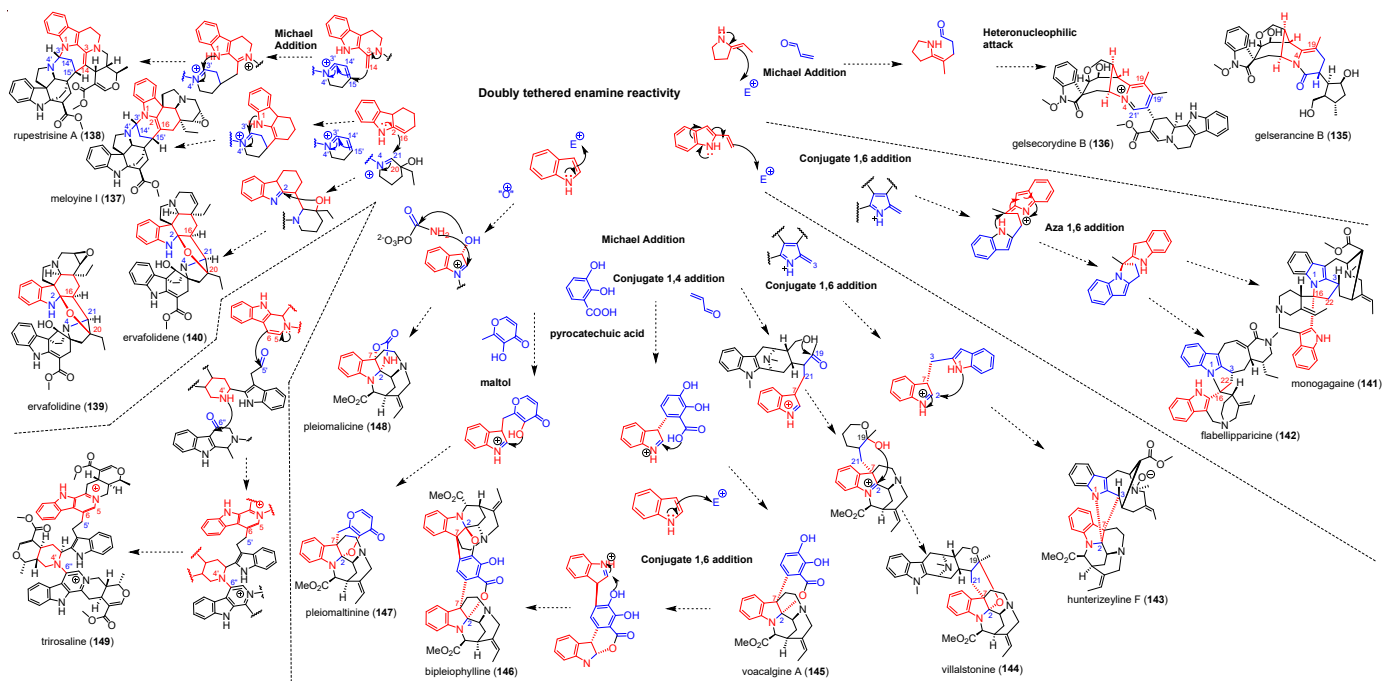

**Fig. S9** Doubly tethered oligomers resulting from an enamine reactivity (see S2 for a comprehensive listing, red- and blue-colored moieties refer to nucleophilic and electrophilic sites, respectively).



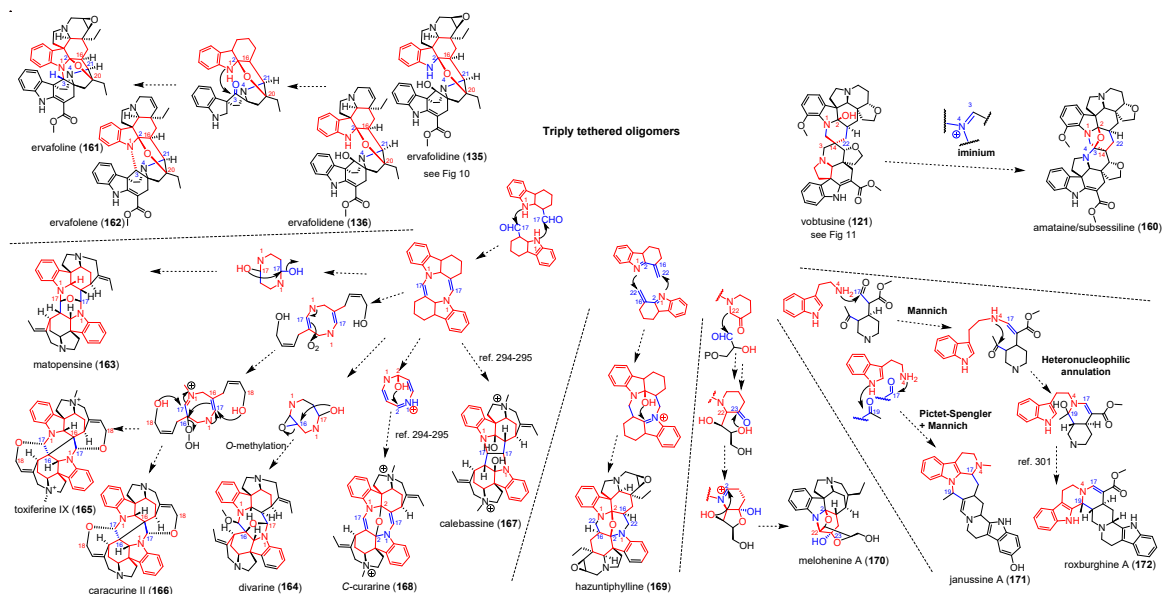

**Fig. S10** Triply tethered oligomers (see S2 for a comprehensive listing, red and blue colored moieties refer to nucleophilic and electrophilic sites, respectively)

## 5 References

1. T.-S. Kam, K. Yoganathan, H.-Y. Li and N. Harada, *Tetrahedron*, 1997, **53**, 12661-12670.
2. P. Pal, J. R. Alley and C. A. Townsend, *ACS Chemical Biology*, 2023, **18**, 304-314.
3. H. Aldemir, R. Richarz and T. A. M. Gulder, *Angewandte Chemie International Edition*, 2014, **53**, 8286-8293.
4. M. Baunach, L. Ding, T. Bruhn, G. Bringmann and C. Hertweck, *Angewandte Chemie International Edition*, 2013, **52**, 9040-9043.
5. G. Carr, W. Tay, H. Bottrill, S. K. Andersen, A. G. Mauk and R. J. Andersen, *Organic Letters*, 2009, **11**, 2996-2999.
6. S. Y. Jabri and L. E. Overman, *Journal of the American Chemical Society*, 2013, **135**, 4231-4234.
7. S. Cai, X. Kong, W. Wang, H. Zhou, T. Zhu, D. Li and Q. Gu, *Tetrahedron Letters*, 2012, **53**, 2615-2617.
8. E. M. Boyd and J. Sperry, *Organic Letters*, 2014, **16**, 5056-5059.
